# Supplementary material for: Pyroptotic Patterns in Blood Leukocytes Predict Disease Severity and Outcome in COVID-19 Patients
Source: Front Immunol. 2022 Jul 19;13:888661. doi: 10.3389/fimmu.2022.888661 (PMC9343985; doi:10.3389/fimmu.2022.888661)
Supplement: Supplementary file 2 [file Table_1.xlsx]

## Sheet: Description
Table	Description	Table	Description
Table 1	Gene set variation analysis (GVSA) analysis of COVID-19 patients' leukocytes RNA-seq data.	Table 1	Gene set variation analysis (GVSA) analysis of COVID-19 patients’ leukocytes RNA-seq data
Table 2	The abundance of leukocytes between the different types of patients.	Table 2	Differences in leukocyte count between types of patients
Table 3	Differentially Expressed Genes between two PYRclusters.	Table 3	Differentially Expressed Genes between the two PYRclusters
Table 4	The abundance of leukocytes between two PYRclusters.	Table 4	GSEA results of 763 proteins
Table 5	KEGG enrichment of DEGs between two PYRclusters.	Table 5	KEGG enrichment of DEGs in the two PYRclusters
Table 6	GO enrichment of DEGs between two PYRclusters.	Table 6	GO enrichment of DEGs in the two PYRclusters
Table 7	Transcription factors regulating pyroptotic patterns.	Table 7	Leukocyte count in the two PYRclusters
Table 8	Compounds targeted transcription factors that regulate different pyroptotic patterns.	Table 8	Transcription factors that regulate pyroptotic patterns
		Table 9	Targeted transcription factors that regulate pyroptotic patterns

## Sheet: Table 1
id	logFC	AveExpr	t	P.Value	adj.P.Val	B
KEGG_CELL_CYCLE	0.473247	-0.000658716	10.4449	5.19369e-19	9.60832e-17	32.6646
KEGG_OOCYTE_MEIOSIS	0.386466	0.00140837	9.43783	1.70464e-16	1.57679e-14	26.9963
KEGG_ONE_CARBON_POOL_BY_FOLATE	0.368994	0.0024067	7.61887	4.30002e-12	2.65168e-10	17.0931
KEGG_PROGESTERONE_MEDIATED_OOCYTE_MATURATION	0.287819	-0.0063022	7.50798	7.8038e-12	3.60926e-10	16.512
KEGG_P53_SIGNALING_PATHWAY	0.265626	-0.00637455	7.04279	9.16253e-11	3.39014e-09	14.1123
KEGG_GLYCOSAMINOGLYCAN_BIOSYNTHESIS_KERATAN_SULFATE	0.348319	-0.0182037	7.00121	1.13838e-10	3.51001e-09	13.9011
KEGG_FRUCTOSE_AND_MANNOSE_METABOLISM	-0.280994	-0.0303761	-6.60426	8.78374e-10	2.32142e-08	11.9142
KEGG_HOMOLOGOUS_RECOMBINATION	0.348327	-0.00373242	5.63791	9.90382e-08	2.29026e-06	7.33704
KEGG_HEMATOPOIETIC_CELL_LINEAGE	-0.18461	-0.00336793	-5.54196	1.54882e-07	3.18368e-06	6.90562
KEGG_UBIQUITIN_MEDIATED_PROTEOLYSIS	0.243621	-0.00425192	5.2469	5.95744e-07	1.10213e-05	5.60829
KEGG_MISMATCH_REPAIR	0.327549	-0.00542202	4.9449	2.25907e-06	3.66727e-05	4.32883
KEGG_SMALL_CELL_LUNG_CANCER	0.189387	-0.00180927	4.92969	2.41288e-06	3.66727e-05	4.26573
KEGG_BASAL_TRANSCRIPTION_FACTORS	0.305892	0.0159906	4.91446	2.577e-06	3.66727e-05	4.2027
KEGG_GLIOMA	0.229561	0.00199923	4.87939	2.99706e-06	3.71966e-05	4.05811
KEGG_DNA_REPLICATION	0.375543	-0.00450956	4.87793	3.01594e-06	3.71966e-05	4.0521
KEGG_PROSTATE_CANCER	0.216409	-0.0014233	4.74413	5.33229e-06	6.16546e-05	3.50707
KEGG_ABC_TRANSPORTERS	0.185903	0.00559502	4.68132	6.94383e-06	7.55652e-05	3.25487
KEGG_PROTEIN_EXPORT	0.350566	-0.0143695	4.66016	7.58587e-06	7.79659e-05	3.17047
KEGG_CYSTEINE_AND_METHIONINE_METABOLISM	0.168936	0.00515413	4.3132	3.11505e-05	0.000273442	1.82632
KEGG_RIBOSOME	-0.49716	-0.027248	-4.30717	3.19055e-05	0.000273442	1.8036
KEGG_ASTHMA	-0.288681	-0.0215471	-4.30446	3.22494e-05	0.000273442	1.79343
KEGG_LYSINE_DEGRADATION	0.220114	0.000777035	4.30237	3.25174e-05	0.000273442	1.78558
KEGG_PANCREATIC_CANCER	0.213377	0.00288983	4.1621	5.6325e-05	0.000453049	1.26527
KEGG_ARACHIDONIC_ACID_METABOLISM	-0.172347	-0.000596791	-4.10121	7.12195e-05	0.000548984	1.04351
KEGG_GLYCOLYSIS_GLUCONEOGENESIS	-0.160302	-0.00142286	-4.05622	8.45742e-05	0.000625849	0.881268
KEGG_PENTOSE_AND_GLUCURONATE_INTERCONVERSIONS	-0.190476	0.0257006	-3.82913	0.000197351	0.00140423	0.0838768
KEGG_N_GLYCAN_BIOSYNTHESIS	0.239194	-0.00841261	3.7996	0.000219786	0.00150594	-0.0171153
KEGG_PENTOSE_PHOSPHATE_PATHWAY	-0.184393	-0.0113079	-3.72388	0.000288907	0.00190124	-0.27324
KEGG_NUCLEOTIDE_EXCISION_REPAIR	0.219549	0.00313126	3.71521	0.000298032	0.00190124	-0.30233
KEGG_TGF_BETA_SIGNALING_PATHWAY	0.133976	0.00475788	3.66888	0.000351543	0.00216785	-0.456692
KEGG_GLYCOSAMINOGLYCAN_BIOSYNTHESIS_HEPARAN_SULFATE	-0.139749	8.61758e-05	-3.65038	0.000375348	0.00223998	-0.517883
KEGG_STEROID_BIOSYNTHESIS	0.240046	-0.00691201	3.53431	0.000563201	0.00325601	-0.896062
KEGG_MELANOMA	0.131289	0.00606655	3.39166	0.000915515	0.00513244	-1.34694
KEGG_TYROSINE_METABOLISM	-0.148384	0.0101456	-3.34038	0.00108642	0.00576329	-1.50523
KEGG_CARDIAC_MUSCLE_CONTRACTION	-0.163126	-0.010619	-3.33929	0.00109035	0.00576329	-1.50857
KEGG_NON_HOMOLOGOUS_END_JOINING	0.17744	-0.00950943	3.28654	0.00129769	0.00666867	-1.66924
KEGG_AUTOIMMUNE_THYROID_DISEASE	-0.175335	-0.00492997	-3.23272	0.00154671	0.00773355	-1.83093
KEGG_METABOLISM_OF_XENOBIOTICS_BY_CYTOCHROME_P450	-0.172486	0.013646	-3.21409	0.00164279	0.00799779	-1.88636
KEGG_DRUG_METABOLISM_OTHER_ENZYMES	-0.13915	0.0180573	-3.16719	0.00190984	0.00905948	-2.02469
KEGG_PATHWAYS_IN_CANCER	0.10089	0.00319772	3.14114	0.00207509	0.0095973	-2.10079
KEGG_BIOSYNTHESIS_OF_UNSATURATED_FATTY_ACIDS	0.139968	0.00377796	3.10218	0.00234709	0.0103533	-2.21357
KEGG_PANTOTHENATE_AND_COA_BIOSYNTHESIS	-0.148471	-0.00928014	-3.10172	0.00235047	0.0103533	-2.21489
KEGG_DRUG_METABOLISM_CYTOCHROME_P450	-0.160534	0.0253045	-3.07208	0.00257938	0.011002	-2.29985
KEGG_WNT_SIGNALING_PATHWAY	0.103084	-0.00196138	3.06749	0.0026167	0.011002	-2.31298
KEGG_NON_SMALL_CELL_LUNG_CANCER	0.159154	-0.00214447	3.03777	0.0028701	0.0117993	-2.39735
KEGG_RENAL_CELL_CARCINOMA	0.167878	-0.00231558	3.00324	0.00319294	0.0128073	-2.49449
KEGG_GLYCOSYLPHOSPHATIDYLINOSITOL_GPI_ANCHOR_BIOSYNTHESIS	0.171778	3.59301e-05	2.9818	0.00340993	0.0128073	-2.55433
KEGG_STEROID_HORMONE_BIOSYNTHESIS	-0.153592	0.0246433	-2.98058	0.00342268	0.0128073	-2.55773
KEGG_BETA_ALANINE_METABOLISM	0.134728	0.00122529	2.97689	0.00346144	0.0128073	-2.56797
KEGG_NEUROACTIVE_LIGAND_RECEPTOR_INTERACTION	-0.134251	0.0240263	-2.94478	0.00381678	0.0138452	-2.65677
KEGG_PROPANOATE_METABOLISM	0.177583	0.00371604	2.9311	0.00397811	0.0140644	-2.69434
KEGG_RNA_DEGRADATION	0.167324	-0.00994964	2.92687	0.00402926	0.0140644	-2.70593
KEGG_ALPHA_LINOLENIC_ACID_METABOLISM	-0.125593	0.00276308	-2.83406	0.00531436	0.0182066	-2.95641
KEGG_CHRONIC_MYELOID_LEUKEMIA	0.149278	0.000354436	2.81189	0.00567218	0.0190792	-3.01518
KEGG_RETINOL_METABOLISM	-0.141073	0.035563	-2.79688	0.00592691	0.01958	-3.05476
KEGG_VASOPRESSIN_REGULATED_WATER_REABSORPTION	0.109508	-0.0119982	2.76369	0.00652733	0.0211852	-3.14157
KEGG_TAURINE_AND_HYPOTAURINE_METABOLISM	-0.174316	-0.0109023	-2.71645	0.00747745	0.0234462	-3.26354
KEGG_PHOSPHATIDYLINOSITOL_SIGNALING_SYSTEM	0.141906	-0.00209004	2.69681	0.0079082	0.0243836	-3.3137
KEGG_GLYCOSAMINOGLYCAN_BIOSYNTHESIS_CHONDROITIN_SULFATE	-0.102823	-0.0115907	-2.6526	0.0089609	0.0271765	-3.4254
KEGG_TYPE_I_DIABETES_MELLITUS	-0.138109	-0.0108262	-2.63983	0.00928787	0.0277138	-3.45737
KEGG_ALDOSTERONE_REGULATED_SODIUM_REABSORPTION	0.123208	-0.0044517	2.61172	0.0100455	0.0290378	-3.52723
KEGG_COLORECTAL_CANCER	0.13328	0.000860685	2.5773	0.0110488	0.0314466	-3.61185
KEGG_GLYCINE_SERINE_AND_THREONINE_METABOLISM	0.114372	-0.00620244	2.50604	0.0134166	0.0376073	-3.78381
KEGG_CIRCADIAN_RHYTHM_MAMMAL	0.153598	-0.0101381	2.47907	0.014425	0.0392446	-3.84775
KEGG_SELENOAMINO_ACID_METABOLISM	0.111095	3.89669e-05	2.45681	0.0153077	0.0410423	-3.90005
KEGG_ALLOGRAFT_REJECTION	-0.154589	-0.0185565	-2.42165	0.0168004	0.044401	-3.98181

## Sheet: Table 2
id	C1	C2	C3	C4	C5	C6	C7	C8	C9	C10	C11	C12	C13	C14	C15	C16	C17	C18	C19	C20	C21	C22	C23	C24	C25	C26	C27	C28	C29	C30	C31	C32	C33	C34	C35	C36	C37	C38	C39	C40	C41	C42	C43	C44	C45	C46	C47	C48	C49
Activated.B.cell	0.0963646	0.443475	0.278637	0.525727	0.430643	0.461428	0.53455	0.320795	0.508016	0.398302	0.537714	0.419999	0.471071	0.460816	0.404171	0.422637	0.442363	0.475315	0.494199	0.420726	0.350649	0.345456	0.312633	0.391178	0.406711	0.49668	0.405627	0.415309	0.360069	0.495626	0.499857	0.26965	0.464538	0.461825	0.475248	0.380682	0.360436	0.424356	0.411746	0.400491	0.40921	0.515563	0.31511	0.483077	0.406849	0.445298	0.442232	0.426108	0.429499
Activated.CD4.T.cell	0.379966	0.437817	0.370778	0.444987	0.411239	0.468287	0.498204	0.401954	0.427191	0.421425	0.560681	0.431184	0.513912	0.410617	0.398556	0.459882	0.440848	0.397097	0.408803	0.367136	0.393332	0.406676	0.355003	0.351121	0.484336	0.400473	0.454005	0.343045	0.32355	0.438564	0.483947	0.479064	0.40381	0.438933	0.485232	0.395997	0.405234	0.400822	0.426991	0.420501	0.337979	0.457362	0.385205	0.386102	0.420361	0.385901	0.440438	0.353262	0.317017
Activated.CD8.T.cell	0.681263	0.712714	0.663599	0.760064	0.682462	0.773064	0.775794	0.509439	0.663311	0.641486	0.797695	0.693571	0.761731	0.57432	0.638203	0.773184	0.752677	0.738497	0.700614	0.63256	0.643796	0.522821	0.589201	0.611355	0.736689	0.69288	0.721291	0.554582	0.587152	0.724632	0.636087	0.636579	0.706813	0.730838	0.699886	0.670555	0.70729	0.6434	0.665431	0.627777	0.556307	0.679068	0.618687	0.625417	0.683497	0.742135	0.697304	0.637239	0.74338
Activated.dendritic.cell	0.616943	0.650664	0.653084	0.57619	0.607489	0.597434	0.549846	0.65972	0.630257	0.641641	0.578395	0.640484	0.599087	0.60234	0.659987	0.622685	0.622306	0.677622	0.604525	0.621985	0.64311	0.626368	0.620385	0.641151	0.614959	0.630368	0.638883	0.630131	0.600972	0.608996	0.629417	0.63321	0.641811	0.643322	0.611588	0.640761	0.607707	0.585757	0.649802	0.63399	0.634492	0.58655	0.588438	0.6389	0.584641	0.610876	0.616719	0.621538	0.611211
CD56bright.natural.killer.cell	0.34748	0.359162	0.357612	0.368463	0.344807	0.366156	0.348393	0.316536	0.309677	0.318847	0.353861	0.317862	0.356617	0.331805	0.345654	0.34893	0.333576	0.364635	0.342343	0.304371	0.328569	0.312782	0.320328	0.289415	0.326658	0.313965	0.331572	0.336206	0.366734	0.34409	0.349924	0.345596	0.343662	0.376788	0.344494	0.34961	0.339953	0.304246	0.351146	0.33191	0.348998	0.335441	0.367562	0.355676	0.352411	0.337549	0.340809	0.33046	0.383156
CD56dim.natural.killer.cell	0.196274	0.222357	0.189667	0.250738	0.217526	0.255614	0.263064	0.190671	0.19303	0.199097	0.271708	0.185607	0.281612	0.159899	0.193244	0.276553	0.260336	0.198128	0.166808	0.182734	0.235481	0.167238	0.219278	0.219164	0.223251	0.225479	0.209782	0.150884	0.178694	0.196666	0.190811	0.309443	0.26812	0.195279	0.215006	0.185709	0.284284	0.205893	0.188873	0.232672	0.169484	0.198371	0.186331	0.175374	0.184685	0.209712	0.187809	0.20736	0.302202
Eosinophil	0.181513	0.318685	0.246135	0.377809	0.363722	0.365978	0.272884	0.325705	0.212638	0.24815	0.266745	0.24637	0.337632	0.290871	0.310296	0.262245	0.294723	0.330817	0.303988	0.298006	0.260592	0.280874	0.341393	0.283888	0.253204	0.319603	0.329907	0.321364	0.21908	0.252026	0.372762	0.322871	0.204621	0.422305	0.340223	0.273971	0.333364	0.366434	0.29771	0.242243	0.279162	0.291696	0.374662	0.309904	0.469607	0.357744	0.313078	0.303887	0.284085
Gamma.delta.T.cell	0.568701	0.545788	0.5456	0.560808	0.54097	0.547577	0.560358	0.553944	0.546292	0.543361	0.556201	0.537968	0.560885	0.539568	0.528665	0.567776	0.556804	0.569612	0.569012	0.528893	0.557935	0.520846	0.53363	0.52615	0.544367	0.543889	0.545359	0.529642	0.559205	0.580055	0.53738	0.537392	0.560666	0.540751	0.536518	0.552197	0.571089	0.543182	0.554109	0.566932	0.537933	0.53766	0.525042	0.556255	0.545788	0.567185	0.544435	0.529332	0.546091
Immature.B.cell	0.543979	0.646463	0.613311	0.7518	0.661518	0.649207	0.726094	0.571509	0.63091	0.602624	0.754092	0.628519	0.663582	0.643089	0.600795	0.663723	0.638449	0.67947	0.751843	0.62078	0.59907	0.574845	0.577046	0.601458	0.634903	0.684282	0.618854	0.606057	0.527529	0.694212	0.680705	0.524247	0.64169	0.712944	0.638106	0.595272	0.631217	0.557654	0.553393	0.59267	0.571352	0.694542	0.52916	0.692574	0.647267	0.624291	0.654929	0.555386	0.554603
Immature.dendritic.cell	0.489224	0.542173	0.482195	0.517947	0.475636	0.522019	0.507789	0.553427	0.462416	0.533094	0.503856	0.500342	0.501761	0.507378	0.494753	0.512363	0.512099	0.502892	0.512808	0.494078	0.479859	0.545851	0.537295	0.513723	0.564676	0.495267	0.52893	0.486568	0.49514	0.47362	0.529698	0.532182	0.507544	0.536335	0.525981	0.540379	0.522056	0.486092	0.525416	0.493157	0.488849	0.508218	0.527861	0.510763	0.523181	0.513985	0.517712	0.515316	0.514647
MDSC	0.908959	0.905092	0.893829	0.909656	0.88647	0.905018	0.910893	0.857601	0.882053	0.879251	0.911105	0.88679	0.891502	0.855008	0.854948	0.920022	0.908204	0.922717	0.884157	0.869122	0.847214	0.822789	0.877973	0.876074	0.905673	0.881064	0.89743	0.864915	0.859679	0.871087	0.87451	0.843789	0.902859	0.900429	0.883704	0.894245	0.899544	0.864119	0.881154	0.872323	0.876181	0.882156	0.867965	0.886487	0.884945	0.926077	0.877026	0.89736	0.922493
Macrophage	0.552145	0.543187	0.546233	0.53146	0.517167	0.53273	0.52469	0.528215	0.517372	0.521362	0.483216	0.513239	0.534011	0.504316	0.514405	0.535246	0.545657	0.55884	0.550853	0.530805	0.516117	0.517162	0.561726	0.526155	0.552807	0.525319	0.524442	0.535582	0.529049	0.525795	0.54421	0.446782	0.520753	0.556367	0.539263	0.544126	0.552267	0.517251	0.529598	0.508895	0.521332	0.526947	0.543062	0.533816	0.543999	0.551572	0.540351	0.537449	0.55007
Mast.cell	0.496692	0.628924	0.500545	0.600845	0.522923	0.619123	0.509555	0.609822	0.470515	0.570404	0.550931	0.538523	0.551838	0.503125	0.581568	0.581101	0.55271	0.602826	0.551229	0.547638	0.490024	0.611183	0.616151	0.564307	0.611235	0.529431	0.594161	0.511518	0.503124	0.543943	0.584024	0.55643	0.517358	0.620957	0.592572	0.565703	0.514933	0.52395	0.549779	0.507756	0.481534	0.572561	0.663759	0.561464	0.601253	0.56691	0.521052	0.584643	0.563884
Monocyte	0.783972	0.767794	0.760789	0.764594	0.722998	0.755788	0.74376	0.741598	0.727777	0.742809	0.742223	0.70391	0.734255	0.710276	0.710735	0.747783	0.770475	0.780818	0.749316	0.738826	0.708414	0.708088	0.74293	0.741187	0.749532	0.746214	0.715881	0.73694	0.763092	0.726082	0.733713	0.720771	0.76551	0.762093	0.751567	0.759277	0.748785	0.736051	0.752581	0.704847	0.756612	0.738001	0.732557	0.750785	0.732923	0.786472	0.721974	0.759704	0.781157
Natural.killer.T.cell	0.301019	0.261114	0.269027	0.328577	0.27376	0.286618	0.286072	0.230131	0.21547	0.253969	0.294998	0.306746	0.290992	0.219156	0.252774	0.318986	0.270135	0.305656	0.298427	0.267986	0.189027	0.186812	0.26173	0.235398	0.269772	0.256421	0.277819	0.23607	0.201522	0.290369	0.233384	0.266609	0.245233	0.276442	0.255427	0.281853	0.272226	0.197986	0.20503	0.249815	0.219315	0.235372	0.251867	0.27594	0.290655	0.267659	0.302893	0.213532	0.235706
Natural.killer.cell	0.409754	0.372267	0.402498	0.384496	0.389885	0.383057	0.387266	0.347105	0.368249	0.36071	0.385176	0.394153	0.388839	0.38348	0.386532	0.382719	0.383802	0.390305	0.386183	0.396652	0.404396	0.346515	0.377899	0.382477	0.372693	0.425683	0.369764	0.387178	0.373818	0.38306	0.359667	0.370808	0.376241	0.401578	0.366835	0.3689	0.396993	0.401754	0.353169	0.393003	0.364345	0.363935	0.363474	0.397371	0.407939	0.393791	0.389838	0.381647	0.360562
Neutrophil	0.880307	0.893542	0.983577	0.895779	0.974087	0.901951	0.867195	0.96921	0.922329	0.873948	0.830548	0.933891	0.912411	0.967944	0.956906	0.86186	0.925333	0.906884	0.921439	0.982858	1	0.972262	0.984284	0.985516	0.88715	0.981038	0.885512	0.993739	0.965956	0.961127	0.928223	0.876047	0.898591	0.951749	0.943009	0.933579	0.969317	0.985665	0.917078	0.977779	0.955667	0.965587	0.9565	0.925387	0.926442	0.953429	0.953923	0.9396	0.871513
Plasmacytoid.dendritic.cell	0.689895	0.746118	0.699176	0.713311	0.704183	0.72821	0.721268	0.712756	0.733348	0.712793	0.713565	0.719252	0.711612	0.717054	0.717407	0.723369	0.734263	0.724332	0.708631	0.722466	0.713532	0.701066	0.704487	0.713966	0.718836	0.722294	0.731931	0.718768	0.709404	0.729769	0.74141	0.719552	0.736788	0.724806	0.736155	0.721376	0.714866	0.708303	0.720808	0.72607	0.722198	0.733881	0.711496	0.726678	0.715549	0.703938	0.72198	0.71286	0.710266
Regulatory.T.cell	0.528119	0.476698	0.45072	0.457663	0.425817	0.45221	0.456196	0.419313	0.450075	0.467548	0.400491	0.481039	0.430115	0.430009	0.393393	0.476096	0.437313	0.54019	0.468187	0.398587	0.408142	0.383983	0.439924	0.399216	0.453341	0.440859	0.457942	0.395793	0.45548	0.4555	0.39637	0.380927	0.495379	0.426413	0.423438	0.440518	0.43593	0.412602	0.417852	0.449174	0.43437	0.423194	0.398433	0.464438	0.399611	0.444638	0.4148	0.451416	0.497209
T.follicular.helper.cell	0.355601	0.344498	0.350009	0.363705	0.339354	0.34477	0.351658	0.298978	0.280669	0.303698	0.363854	0.305542	0.339272	0.273398	0.297806	0.357731	0.361658	0.372668	0.358573	0.317564	0.307991	0.28385	0.320103	0.306965	0.356434	0.335604	0.315904	0.290651	0.298063	0.304443	0.286629	0.288633	0.346533	0.3447	0.309234	0.349712	0.3378	0.316037	0.302808	0.309335	0.290482	0.327736	0.299641	0.346646	0.315582	0.347655	0.309733	0.297155	0.365158
Type.1.T.helper.cell	0.33054	0.358987	0.325459	0.372795	0.34889	0.365205	0.37634	0.31167	0.322015	0.340419	0.372639	0.340453	0.346089	0.321895	0.348235	0.365074	0.356791	0.358591	0.332273	0.32631	0.336679	0.309243	0.332151	0.318849	0.359046	0.338344	0.348267	0.316189	0.326769	0.337663	0.344092	0.338857	0.344464	0.354069	0.345935	0.3455	0.355505	0.320441	0.33021	0.327687	0.328	0.352675	0.332122	0.350626	0.354362	0.34535	0.335085	0.315177	0.35371
Type.17.T.helper.cell	0.170528	0.149881	0.143509	0.136909	0.191359	0.136096	0.171593	0.11156	0.085346	0.154088	0.147691	0.165321	0.136998	0.128002	0.141523	0.131831	0.133622	0.148438	0.140483	0.1261	0.145415	0.117179	0.145664	0.100415	0.127494	0.131318	0.134284	0.0967222	0.11692	0.116329	0.174626	0.124326	0.167233	0.126954	0.128378	0.150772	0.144317	0.125338	0.125626	0.12583	0.12823	0.163426	0.149979	0.155656	0.169343	0.0944519	0.144514	0.125679	0.131348
Type.2.T.helper.cell	0.101716	0.10103	0.0965645	0.0910437	0.128089	0.10263	0.0961841	0.117718	0.0808987	0.109418	0.121709	0.0967383	0.116514	0.0829442	0.0780396	0.110961	0.14951	0.0868457	0.0975878	0.0856749	0.064409	0.127435	0.106731	0.0996391	0.105384	0.10938	0.138426	0.0908967	0.0827215	0.10425	0.115663	0.108522	0.0782395	0.106784	0.141068	0.101532	0.0783577	0.0576154	0.12249	0.1169	0.0762677	0.165212	0.0811679	0.120456	0.144955	0.0320321	0.114061	0.0719995	0.078643
[truncated: 77 more columns]

## Sheet: Table 3
	Gene	logFC	AveExpr	t	P.Value	adj.P.Val	B
1	C16orf72	-1.07542	5.28334	-13.5066	3.58584e-24	6.56853e-20	44.4117
2	FPR1	-1.06734	11.3982	-12.8731	7.51754e-23	6.28603e-19	41.4321
3	TGFA	-1.56971	4.19126	-12.8081	1.02948e-22	6.28603e-19	41.1241
4	TLR5	-1.74865	4.81355	-12.7188	1.5869e-22	7.26722e-19	40.7001
6	RALB	-1.00667	7.9566	-12.5892	2.97806e-22	9.05682e-19	40.0832
7	SH3GLB1	-1.1884	6.20751	-12.5424	3.74014e-22	9.05682e-19	39.8599
9	PPP1R3B	-1.26507	5.64219	-12.3114	1.15409e-21	2.25642e-18	38.7553
10	HSDL2	-1.02448	5.44492	-12.2943	1.25453e-21	2.25642e-18	38.6735
12	AQP9	-1.26848	9.74334	-12.2488	1.5678e-21	2.39325e-18	38.4549
14	FAM160B1	-1.10106	4.35192	-12.1082	3.12243e-21	4.08548e-18	37.7794
15	FAM126B	-1.5668	4.7699	-12.0461	4.23343e-21	5.16986e-18	37.4808
17	BASP1	-1.26532	8.65748	-11.9793	5.87879e-21	6.33457e-18	37.1588
18	IPMK	-1.40477	3.79929	-11.8909	9.08259e-21	9.24305e-18	36.7321
21	SLC22A4	-1.37502	5.01177	-11.8286	1.23454e-20	1.07687e-17	36.431
22	UBXN2B	-1.07695	5.55196	-11.8097	1.35552e-20	1.12865e-17	36.3393
23	STK3	-1.04449	2.90832	-11.777	1.59269e-20	1.24172e-17	36.1811
27	UBE2D1	-1.19836	6.49258	-11.5022	6.19351e-20	4.20195e-17	34.8486
28	CYB5R4	-1.02656	4.65498	-11.4837	6.78766e-20	4.44059e-17	34.7587
30	ALPK1	-1.09596	4.95291	-11.416	9.49654e-20	5.79859e-17	34.4292
33	RAB33B	-1.19387	4.07691	-11.371	1.18691e-19	6.48232e-17	34.2103
34	FCGR2A	-1.14032	9.55189	-11.3683	1.20318e-19	6.48232e-17	34.197
37	SRPK1	-1.41871	5.76789	-11.2973	1.71155e-19	8.47358e-17	33.8511
38	EGLN1	-1.08948	6.2131	-11.2803	1.86212e-19	8.8246e-17	33.7683
39	EXOC6	-1.11916	4.54716	-11.2744	1.9174e-19	8.8246e-17	33.7396
44	ATXN1	-1.01667	3.03261	-11.2385	2.29153e-19	9.54007e-17	33.5646
45	MAPK14	-1.34098	7.27639	-11.199	2.78953e-19	1.13552e-16	33.3716
46	PPP1R3D	-1.2584	4.28631	-11.1906	2.90766e-19	1.13885e-16	33.3309
53	HCST	1.06247	7.4871	11.0593	5.58883e-19	1.93163e-16	32.6895
57	WDFY3	-1.39979	3.82286	-10.9875	7.99283e-19	2.56864e-16	32.3383
60	UBE2W	-1.01006	4.135	-10.921	1.11328e-18	3.39884e-16	32.013
61	TLE5	1.4784	6.76856	10.9138	1.15433e-18	3.46492e-16	31.9775
64	KIF1B	-1.2554	3.39466	-10.9041	1.21135e-18	3.46712e-16	31.9301
69	KCNJ2	-1.61431	4.77223	-10.8563	1.53807e-18	4.05401e-16	31.6957
73	MANSC1	-1.39074	4.76639	-10.8232	1.8141e-18	4.49046e-16	31.5337
75	SEPTIN9	1.1184	5.81123	10.8205	1.83854e-18	4.49046e-16	31.5205
79	RPL36	1.68226	7.69042	10.7881	2.16128e-18	5.01144e-16	31.3617
80	SIPA1L2	-1.68401	3.72225	-10.7837	2.20923e-18	5.05858e-16	31.3402
83	EIF3G	1.13595	6.42347	10.765	2.42559e-18	5.35326e-16	31.2485
84	LMNB1	-1.28417	7.12865	-10.7546	2.5555e-18	5.57281e-16	31.1972
88	KLHL2	-1.6028	6.11588	-10.7376	2.78198e-18	5.79094e-16	31.1139
89	TAS2R40	-1.75772	2.13179	-10.7344	2.82664e-18	5.81779e-16	31.0982
90	FNIP1	-1.27996	4.08504	-10.7304	2.88352e-18	5.86892e-16	31.0787
94	NKG7	1.76282	8.32774	10.6851	3.61532e-18	7.04526e-16	30.8566
96	CTBS	-1.08595	4.66829	-10.6622	4.05403e-18	7.73559e-16	30.7442
98	SULT1B1	-1.60795	5.40997	-10.6296	4.7717e-18	8.91919e-16	30.5841
99	TMC6	1.03091	4.2235	10.5798	6.1219e-18	1.13057e-15	30.3395
101	MCTP2	-1.26398	4.86959	-10.571	6.39639e-18	1.15668e-15	30.2964
103	SEPTIN14	-1.19436	1.59211	-10.5575	6.84406e-18	1.21718e-15	30.23
104	FNDC3B	-1.15	4.06101	-10.5449	7.29049e-18	1.28168e-15	30.1679
107	GALNT3	-1.34393	3.87482	-10.5394	7.49319e-18	1.28281e-15	30.141
109	MTF1	-1.01031	3.8417	-10.5203	8.24334e-18	1.38534e-15	30.0473
111	NAMPT	-1.4639	10.5475	-10.5005	9.10258e-18	1.50217e-15	29.95
112	CD81	1.36834	4.89349	10.4943	9.39069e-18	1.53588e-15	29.9194
113	CNEP1R1	-1.00464	4.96157	-10.4824	9.9648e-18	1.61536e-15	29.8611
119	RPS2	1.05441	9.59602	10.4563	1.13595e-17	1.74701e-15	29.7325
121	RPS19	1.46663	7.76334	10.4531	1.15399e-17	1.74701e-15	29.717
122	RPS15	1.33157	8.81827	10.4506	1.16879e-17	1.75491e-15	29.7045
124	CR1	-1.4675	5.63795	-10.4217	1.35094e-17	1.99568e-15	29.5623
126	F5	-1.23373	3.79373	-10.4145	1.40038e-17	2.03588e-15	29.527
127	REPS2	-1.20987	3.9101	-10.4106	1.42812e-17	2.05334e-15	29.5077
135	RPL35	1.24729	9.79169	10.3947	1.54628e-17	2.09813e-15	29.4297
137	ATP6V1C1	-1.15903	4.67778	-10.3807	1.65876e-17	2.2179e-15	29.3607
139	MAN2C1	1.06931	3.99066	10.3667	1.7795e-17	2.3451e-15	29.2917
142	SLC2A3	-1.14777	8.18678	-10.3398	2.03594e-17	2.62636e-15	29.1595
143	IRAG1	-1.15411	4.51846	-10.3069	2.40118e-17	3.07586e-15	28.9975
144	KIAA0825	-1.15901	1.80054	-10.2986	2.5025e-17	3.17632e-15	28.9569
145	NIBAN1	-1.32178	6.48159	-10.2977	2.51428e-17	3.17632e-15	28.9523
156	MAP3K20	-1.12466	2.87112	-10.2262	3.59802e-17	4.22491e-15	28.6004
157	LRRC4	-1.03876	4.57885	-10.2239	3.63983e-17	4.24678e-15	28.589
158	ACSL1	-1.62921	9.19236	-10.2215	3.68304e-17	4.25078e-15	28.5774
161	GPR27	-1.15451	5.36326	-10.2175	3.75865e-17	4.25078e-15	28.5575
162	MCTP1	-1.08773	3.90407	-10.2174	3.75929e-17	4.25078e-15	28.5573
167	RNF24	-1.25781	5.51079	-10.1918	4.27512e-17	4.68932e-15	28.4311
172	TRIM25	-1.08167	6.50129	-10.1775	4.59146e-17	4.88991e-15	28.361
173	NABP1	-1.03275	5.17283	-10.1679	4.81872e-17	5.10227e-15	28.3135
176	PRMT1	1.10641	4.81284	10.1589	5.04114e-17	5.24679e-15	28.2692
178	FPR2	-1.2332	8.20835	-10.1514	5.23323e-17	5.3628e-15	28.2325
180	GSTP1	1.347	7.11935	10.1501	5.2697e-17	5.3628e-15	28.2257
183	EDF1	1.1307	7.44493	10.1437	5.44057e-17	5.41871e-15	28.1943
184	SSR4	1.24005	7.42258	10.1436	5.44296e-17	5.41871e-15	28.1939
185	GNG10	-1.42695	9.3611	-10.1329	5.74414e-17	5.68763e-15	28.141
198	PYGL	-1.21621	8.32216	-10.0932	7.00722e-17	6.48274e-15	27.9458
199	RPS21	1.14344	9.78298	10.0891	7.15277e-17	6.58414e-15	27.9256
204	MAK	-1.60027	3.14297	-10.0708	7.84052e-17	7.04033e-15	27.8355
207	KREMEN1	-1.58584	4.3342	-10.0588	8.33032e-17	7.37173e-15	27.776
208	NRBF2	-1.00248	7.2383	-10.057	8.40344e-17	7.40069e-15	27.7674
215	SDCBP	-1.22808	9.89305	-10.0307	9.58975e-17	8.17047e-15	27.6377
217	CARD6	-1.20202	4.33723	-10.0287	9.68821e-17	8.17827e-15	27.6277
220	PPP4R2	-1.15218	5.25802	-10.0235	9.94118e-17	8.27739e-15	27.6024
222	CUTA	1.1738	5.63756	10.018	1.02209e-16	8.43364e-15	27.5751
223	SNRPD2	1.06348	7.7668	10.0166	1.02932e-16	8.45517e-15	27.5682
225	ST6GALNAC6	1.11088	4.04399	10.0119	1.05362e-16	8.54895e-15	27.5453
229	MAP4K1	1.15133	3.72069	10.005	1.09098e-16	8.71555e-15	27.5111
230	GK	-1.25512	5.61556	-10.0035	1.09903e-16	8.71555e-15	27.5039
232	GCA	-1.36029	8.63946	-10.0022	1.10643e-16	8.73603e-15	27.4973
233	MAP2K6	-1.40284	2.89958	-9.99965	1.12055e-16	8.80955e-15	27.4848
236	ICAM2	1.2668	5.83791	9.99073	1.17186e-16	9.0958e-15	27.4409
240	STXBP5	-1.16295	3.94913	-9.97889	1.24358e-16	9.49164e-15	27.3825
243	TLR4	-1.32065	5.68672	-9.95123	1.4287e-16	1.07699e-14	27.2462
244	FEM1C	-1.03015	3.43259	-9.94709	1.45872e-16	1.09512e-14	27.2258
249	FGD4	-1.28646	3.38598	-9.93143	1.57797e-16	1.16085e-14	27.1487
250	HAUS4	-1.00356	6.69227	-9.92558	1.62497e-16	1.18457e-14	27.1198
264	VNN2	-1.38188	10.3094	-9.87471	2.09755e-16	1.45542e-14	26.8692
265	NME2	1.02501	7.51148	9.86317	2.22259e-16	1.53636e-14	26.8123
266	SLC37A3	-1.37267	4.51783	-9.86171	2.23894e-16	1.53897e-14	26.8051
268	RPL18A	1.32647	9.28563	9.85666	2.29636e-16	1.56958e-14	26.7802
271	E2F3	-1.14858	4.77592	-9.84341	2.45428e-16	1.65895e-14	26.7149
273	ZAP70	1.75028	4.46904	9.83514	2.55829e-16	1.71659e-14	26.6742
278	ZNF438	-1.08792	4.62645	-9.82514	2.69001e-16	1.7725e-14	26.6249
279	NDUFB2	1.04859	6.98301	9.81933	2.76954e-16	1.81836e-14	26.5963
281	LPCAT2	-1.17125	5.05422	-9.81778	2.7911e-16	1.81948e-14	26.5886
286	NHP2	1.10157	4.79472	9.80308	3.0049e-16	1.92461e-14	26.5162
293	RPL13A	1.0557	10.3432	9.78396	3.30743e-16	2.06777e-14	26.422
296	CREB5	-1.32276	5.45215	-9.77046	3.53936e-16	2.19034e-14	26.3554
297	RPLP1	1.49108	7.95378	9.76967	3.55331e-16	2.19156e-14	26.3516
300	DOK2	1.23926	5.65311	9.76551	3.62835e-16	2.21547e-14	26.331
301	GPAT3	-1.00536	5.27813	-9.76422	3.65191e-16	2.22245e-14	26.3247
305	ADA	1.1517	3.76803	9.75316	3.86039e-16	2.31851e-14	26.2702
306	RALGAPA2	-1.19758	3.96878	-9.74945	3.93294e-16	2.35436e-14	26.2519
310	PXK	-1.04299	4.91708	-9.74279	4.06669e-16	2.40244e-14	26.219
311	MRPL54	1.14989	5.74664	9.74219	4.07882e-16	2.40244e-14	26.2161
317	SLC25A6	1.25396	6.7203	9.707	4.86682e-16	2.81232e-14	26.0427
321	RPL18	1.09697	9.32703	9.69271	5.22864e-16	2.98375e-14	25.9722
324	C19orf53	1.00397	5.60858	9.68662	5.39097e-16	3.04739e-14	25.9422
325	SPOPL	-1.06046	4.9837	-9.68603	5.40671e-16	3.04739e-14	25.9394
326	HRH2	-1.06099	6.3351	-9.68142	5.53337e-16	3.10094e-14	25.9166
329	NFIL3	-1.10526	7.30711	-9.66993	5.86178e-16	3.25392e-14	25.86
331	MBOAT2	-1.21602	3.69152	-9.66768	5.92827e-16	3.28079e-14	25.8489
340	PAG1	-1.2301	4.17112	-9.64052	6.794e-16	3.66037e-14	25.7151
346	PLXNC1	-1.2751	6.64401	-9.6213	7.48211e-16	3.96119e-14	25.6204
349	ACSL4	-1.27635	5.60656	-9.6182	7.59935e-16	3.98868e-14	25.6051
350	HMGA1	1.0117	4.95804	9.6141	7.75745e-16	4.06003e-14	25.5849
356	LSM7	1.06293	5.80883	9.59687	8.45777e-16	4.35195e-14	25.5
358	LIN7A	-1.1628	4.44622	-9.59314	8.61787e-16	4.40956e-14	25.4816
359	PLSCR3	1.11127	4.87945	9.58917	8.79122e-16	4.47738e-14	25.462
360	BCL6	-1.3946	8.14983	-9.58899	8.79931e-16	4.47738e-14	25.4611
363	SRGN	-1.24485	12.2743	-9.58594	8.9349e-16	4.5088e-14	25.4461
367	TLR8	-1.28793	6.46049	-9.5726	9.55324e-16	4.76829e-14	25.3804
369	RPLP2	1.33722	9.4811	9.56642	9.85439e-16	4.89195e-14	25.3499
372	NDUFV1	1.19824	4.61962	9.55854	1.02515e-15	5.04803e-14	25.3111
374	BCL2A1	-1.28654	10.1432	-9.55658	1.0353e-15	5.07076e-14	25.3015
378	CPEB2	-1.06392	2.85193	-9.54629	1.09017e-15	5.283e-14	25.2508
382	CDK14	-1.07006	3.11871	-9.53736	1.14011e-15	5.46714e-14	25.2068
384	LAT	1.31815	4.98778	9.52997	1.18318e-15	5.64413e-14	25.1704
390	RPL8	1.09012	9.54879	9.51519	1.27428e-15	5.97007e-14	25.0975
398	PCNX1	-1.09789	4.73282	-9.48207	1.50464e-15	6.9251e-14	24.9344
401	NOP53	1.39586	5.95978	9.46681	1.6243e-15	7.41993e-14	24.8592
404	HLA.DPB1	1.55202	5.40222	9.45454	1.72743e-15	7.83243e-14	24.7988
407	RPL38	1.0669	7.88611	9.44753	1.78927e-15	8.05302e-14	24.7643
412	SYCP2	-1.02514	1.61479	-9.44209	1.83879e-15	8.16903e-14	24.7375
415	RPL27A	1.10104	7.21883	9.43616	1.89433e-15	8.36151e-14	24.7082
417	RPL37A	1.04486	7.73216	9.42628	1.99057e-15	8.74421e-14	24.6596
431	TSEN54	1.05946	3.06136	9.39025	2.38481e-15	1.01357e-13	24.4822
441	ABHD14B	1.04472	4.0201	9.35924	2.78606e-15	1.15726e-13	24.3295
442	ETS2	-1.3598	5.5341	-9.35831	2.79912e-15	1.15811e-13	24.3249
443	PHPT1	1.31133	5.08224	9.35819	2.80076e-15	1.15811e-13	24.3243
444	SNRPN	1.05496	5.42225	9.35172	2.89321e-15	1.19364e-13	24.2924
447	KCNJ15	-1.11487	7.33606	-9.34249	3.03026e-15	1.2418e-13	24.247
448	MOSPD2	-1.09611	5.13641	-9.34009	3.06687e-15	1.25399e-13	24.2352
464	RPS28	1.75925	6.20249	9.27918	4.16214e-15	1.64315e-13	23.9354
477	B3GNT2	-1.12662	4.93918	-9.25747	4.64083e-15	1.78219e-13	23.8285
478	SIGIRR	1.35271	3.70707	9.25182	4.77412e-15	1.82955e-13	23.8007
483	ADGRE2	-1.00916	5.79594	-9.23255	5.25814e-15	1.99417e-13	23.7059
485	TRIQK	-1.11142	3.60667	-9.22606	5.43209e-15	2.05165e-13	23.6739
487	RPL13	1.30937	8.03749	9.22415	5.48428e-15	2.0599e-13	23.6646
489	B4GALT5	-1.17571	6.41643	-9.22177	5.55005e-15	2.07527e-13	23.6528
493	NDUFA13	1.2225	7.603	9.21385	5.7748e-15	2.1457e-13	23.6139
497	USP32	-1.08245	5.35384	-9.20284	6.10241e-15	2.24917e-13	23.5597
506	CD55	-1.14734	7.76646	-9.1762	6.97375e-15	2.52461e-13	23.4287
512	ATP11B	-1.27733	5.17028	-9.16931	7.21863e-15	2.58263e-13	23.3948
517	TECR	1.10434	5.02115	9.16423	7.40449e-15	2.62351e-13	23.3698
519	CTSW	1.70889	6.14199	9.15827	7.62897e-15	2.69263e-13	23.3405
525	SLC40A1	-1.02333	6.40308	-9.15039	7.93615e-15	2.76903e-13	23.3018
527	AKR1B1	1.00505	4.76118	9.14904	7.99018e-15	2.77731e-13	23.2951
528	SOS2	-1.22501	4.99331	-9.14645	8.09436e-15	2.80819e-13	23.2824
545	GABRR2	-1.36597	1.82805	-9.10421	1.00014e-14	3.36158e-13	23.0747
546	APC	-1.00122	2.90691	-9.10085	1.0171e-14	3.41231e-13	23.0582
548	RPS5	1.18818	8.91532	9.09918	1.02563e-14	3.42837e-13	23.05
556	CPEB4	-1.35828	4.18206	-9.08329	1.11057e-14	3.65887e-13	22.9719
557	C12orf57	1.66402	5.12195	9.07768	1.14223e-14	3.75204e-13	22.9443
558	MAP3K2	-1.01956	4.71717	-9.07755	1.14294e-14	3.75204e-13	22.9437
563	TMED8	-1.28329	3.42989	-9.06112	1.24097e-14	4.03662e-13	22.8629
565	MGAM	-1.59314	6.35987	-9.06027	1.24622e-14	4.03921e-13	22.8588
580	FBL	1.15532	6.45992	9.03762	1.39588e-14	4.40857e-13	22.7474
582	RPL3	1.09251	9.92565	9.0324	1.4328e-14	4.50964e-13	22.7218
586	SEPTIN1	1.44145	4.77611	9.02403	1.49407e-14	4.67038e-13	22.6807
587	CDC25B	1.24915	4.44201	9.02299	1.50189e-14	4.68414e-13	22.6756
590	CPD	-1.24335	5.3601	-9.02149	1.51321e-14	4.69378e-13	22.6682
594	AGFG1	-1.28408	4.63881	-9.01815	1.5387e-14	4.74511e-13	22.6518
599	TLR10	-1.10286	3.51992	-9.01164	1.58969e-14	4.86144e-13	22.6198
602	BMX	-1.7333	3.55662	-9.0036	1.65497e-14	5.03583e-13	22.5803
608	GAS7	-1.05904	5.32247	-8.99239	1.75042e-14	5.26543e-13	22.5253
613	BRWD3	-1.01511	2.62784	-8.9787	1.87448e-14	5.60143e-13	22.4581
619	ZNF281	-1.15132	4.16728	-8.96506	2.00682e-14	5.93875e-13	22.3911
621	SOD2	-1.07993	10.2011	-8.95895	2.06917e-14	6.10356e-13	22.3611
637	APRT	1.3108	5.4574	8.92675	2.43064e-14	6.98971e-13	22.203
645	KLHL8	-1.32641	3.85935	-8.91443	2.58513e-14	7.33039e-13	22.1426
649	SLC22A15	-1.21297	3.55232	-8.91024	2.63982e-14	7.45088e-13	22.122
653	MPP7	-1.14956	3.61691	-8.90191	2.75208e-14	7.72014e-13	22.0811
664	PHTF1	-1.13493	3.97725	-8.88964	2.92621e-14	8.07265e-13	22.0209
667	NSUN7	-1.51515	2.53714	-8.88652	2.97214e-14	8.16247e-13	22.0056
672	MRPL38	1.10539	3.69423	8.87615	3.1303e-14	8.53286e-13	21.9547
673	SLC8A1	-1.29552	2.19079	-8.87548	3.1408e-14	8.54876e-13	21.9515
674	ASPH	-1.80324	4.53822	-8.87226	3.19174e-14	8.67454e-13	21.9357
677	FCHO2	-1.1738	3.64941	-8.85224	3.52747e-14	9.54448e-13	21.8375
683	IGF1R	-1.17173	2.8893	-8.83466	3.85135e-14	1.03293e-12	21.7513
684	ABHD14A	1.019	2.55822	8.83084	3.92554e-14	1.05129e-12	21.7326
707	SELL	-1.22231	10.661	-8.79235	4.75774e-14	1.2327e-12	21.5439
712	TP53I13	1.23001	2.48583	8.78101	5.03473e-14	1.29531e-12	21.4883
726	ATP6V0E2	1.10864	2.61739	8.74471	6.03496e-14	1.52271e-12	21.3105
729	IRAK3	-1.66524	5.35408	-8.73942	6.19639e-14	1.557e-12	21.2846
731	FCAR	-1.30931	6.50122	-8.73531	6.32473e-14	1.5849e-12	21.2645
732	RPL32	1.00268	8.62251	8.73148	6.44679e-14	1.61328e-12	21.2457
739	BIN1	1.27877	3.87438	8.72541	6.64507e-14	1.64695e-12	21.216
742	RNF144B	-1.1442	5.02443	-8.72092	6.7957e-14	1.67768e-12	21.194
749	SBF2	-1.11816	3.21416	-8.70778	7.25619e-14	1.77462e-12	21.1297
750	PFKFB3	-1.45027	5.26167	-8.70605	7.31879e-14	1.78754e-12	21.1212
751	MEF2A	-1.08754	4.51742	-8.70488	7.36163e-14	1.79433e-12	21.1155
756	PCED1A	1.01632	4.17449	8.69225	7.84028e-14	1.89971e-12	21.0537
764	EVL	1.46391	5.37677	8.67641	8.48491e-14	2.03438e-12	20.9762
778	KLF7	-1.23998	3.70277	-8.65527	9.42793e-14	2.2198e-12	20.8728
781	PAXX	1.31819	4.04265	8.65311	9.53024e-14	2.23527e-12	20.8622
786	TLR2	-1.10833	7.91166	-8.65032	9.66338e-14	2.25208e-12	20.8486
788	BOLA2B	1.18029	5.73364	8.64415	9.96519e-14	2.31653e-12	20.8184
790	MGAM2	-1.68105	1.87824	-8.63716	1.03185e-13	2.39258e-12	20.7842
794	IL1R1	-1.84262	3.66956	-8.63046	1.06689e-13	2.46138e-12	20.7514
796	RPL28	1.10897	8.85177	8.62682	1.08644e-13	2.50018e-12	20.7336
801	ITGB7	1.37704	4.83661	8.62209	1.11233e-13	2.54377e-12	20.7105
806	MICOS13	1.31958	4.65763	8.61443	1.1556e-13	2.62566e-12	20.673
808	EEF1D	1.04742	8.01323	8.61188	1.17039e-13	2.65336e-12	20.6606
813	MATK	1.40167	2.31141	8.603	1.22335e-13	2.75637e-12	20.6172
818	GZMM	1.69912	2.42042	8.59442	1.27675e-13	2.8591e-12	20.5752
828	CRIP1	1.67435	6.73555	8.58514	1.33712e-13	2.95813e-12	20.5299
835	DPP7	1.49644	3.71766	8.56781	1.45765e-13	3.19775e-12	20.4452
840	DSC2	-1.42357	2.69645	-8.56442	1.48248e-13	3.23287e-12	20.4287
843	GPR160	-1.18297	5.40118	-8.56091	1.50863e-13	3.27819e-12	20.4115
846	ANXA3	-1.7688	7.97797	-8.55719	1.53678e-13	3.32653e-12	20.3934
857	TET2	-1.11612	4.51855	-8.52998	1.75967e-13	3.76122e-12	20.2605
867	DOCK4	-1.05847	1.97254	-8.5069	1.97385e-13	4.17035e-12	20.1478
874	PDZD8	-1.03169	3.28084	-8.49626	2.08112e-13	4.36179e-12	20.0959
875	DACH1	-1.08509	1.7208	-8.49253	2.12009e-13	4.43838e-12	20.0777
879	TLR6	-1.04098	4.61861	-8.49018	2.145e-13	4.4701e-12	20.0662
883	GNLY	2.22559	7.75424	8.48595	2.19068e-13	4.54461e-12	20.0456
891	RNH1	1.17019	4.18206	8.46416	2.4413e-13	5.01904e-12	19.9393
894	LCK	1.54404	5.39383	8.4569	2.53099e-13	5.18597e-12	19.9039
904	CD6	1.53097	3.82911	8.44778	2.6484e-13	5.36652e-12	19.8594
924	RP2	-1.20401	5.23652	-8.41433	3.12734e-13	6.19985e-12	19.6964
930	HIP1	-1.13888	3.61824	-8.40735	3.23755e-13	6.37693e-12	19.6624
931	PTPRCAP	1.77279	4.7409	8.40342	3.30136e-13	6.49562e-12	19.6432
932	ABHD5	-1.03529	5.95982	-8.39902	3.37433e-13	6.63208e-12	19.6218
950	RUNX3	1.06719	4.20992	8.36278	4.03945e-13	7.78891e-12	19.4453
958	QTRT1	1.08647	1.81726	8.34078	4.5055e-13	8.615e-12	19.3382
960	UCP2	1.02191	6.95124	8.33742	4.58128e-13	8.73939e-12	19.3219
963	ZNF486	-1.07908	2.61857	-8.33439	4.65065e-13	8.84638e-12	19.3071
971	CCPG1	-1.06435	6.26244	-8.32449	4.88472e-13	9.21506e-12	19.259
973	OMG	-1.21992	2.06378	-8.32075	4.97614e-13	9.36823e-12	19.2408
975	CD247	1.5484	5.60314	8.31757	5.05514e-13	9.49744e-12	19.2253
994	TRMT2A	1.00675	2.78338	8.27726	6.17333e-13	1.13766e-11	19.0294
995	EEF2	1.04205	6.95979	8.27589	6.21537e-13	1.14425e-11	19.0227
997	ABI3	1.09546	4.15819	8.27247	6.32153e-13	1.16146e-11	19.0061
1000	IL32	1.67975	7.64724	8.27105	6.36631e-13	1.16569e-11	18.9992
1014	IRF2BPL	-1.3026	4.2846	-8.25843	6.77695e-13	1.22426e-11	18.9379
1015	SRM	1.02124	3.64314	8.25805	6.78994e-13	1.2254e-11	18.936
1026	SLCO4C1	-1.18195	3.10215	-8.24084	7.39377e-13	1.32007e-11	18.8525
1030	ADM	-1.01802	6.10344	-8.23297	7.68769e-13	1.36722e-11	18.8142
1040	EVI2B	-1.17884	10.053	-8.21951	8.21755e-13	1.44739e-11	18.7489
1042	PROK2	-1.26833	8.34383	-8.2171	8.31615e-13	1.46195e-11	18.7372
1044	WDR54	1.00999	2.80931	8.21193	8.53184e-13	1.49699e-11	18.7121
1047	TDRD9	-1.46996	2.90715	-8.20867	8.67037e-13	1.51601e-11	18.6963
1059	NCR3	1.36515	3.31723	8.18556	9.72094e-13	1.68147e-11	18.5841
1062	CREBRF	-1.01847	4.97161	-8.1806	9.96208e-13	1.71832e-11	18.5601
1095	CHCHD10	1.14023	3.75841	8.12451	1.31453e-12	2.19904e-11	18.2882
1099	HLA.DMA	1.20217	6.46583	8.11914	1.34984e-12	2.2499e-11	18.2622
1101	QPCT	-1.01666	8.04521	-8.11216	1.39721e-12	2.32463e-11	18.2284
1103	B3GNT5	-1.3168	3.89958	-8.10991	1.41285e-12	2.34638e-11	18.2175
1117	LRRN1	-1.17615	1.65318	-8.09673	1.50784e-12	2.47275e-11	18.1537
1119	ADAM17	-1.53214	4.1819	-8.09486	1.52184e-12	2.49125e-11	18.1447
1125	HLA.DRB1	1.48275	8.41541	8.08898	1.56667e-12	2.55096e-11	18.1162
1130	HLA.DPA1	1.50369	7.0467	8.08381	1.6072e-12	2.60538e-11	18.0912
1132	CXCR2	-1.14247	9.46383	-8.08268	1.61619e-12	2.61531e-11	18.0857
1133	SSH2	-1.04376	6.16051	-8.08133	1.62693e-12	2.63037e-11	18.0792
1151	ADAM9	-1.12542	3.82822	-8.05657	1.83844e-12	2.92584e-11	17.9594
1157	CEP19	-1.01805	5.62483	-8.04963	1.90246e-12	3.01204e-11	17.9258
1162	EXOSC5	1.05325	2.45188	8.04525	1.94393e-12	3.06445e-11	17.9047
1169	DHRS3	1.13297	2.42711	8.04157	1.97956e-12	3.10193e-11	17.8869
1176	JAK2	-1.02211	5.15203	-8.02794	2.11714e-12	3.29777e-11	17.821
1179	PEBP1	1.03002	5.21002	8.02557	2.14211e-12	3.32817e-11	17.8095
1187	GPR141	-1.16887	4.19318	-8.01797	2.22388e-12	3.43193e-11	17.7728
1198	PRF1	1.72083	5.8681	8.00603	2.35862e-12	3.60644e-11	17.7152
1199	HIPK3	-1.08145	5.37345	-8.00562	2.36335e-12	3.61066e-11	17.7132
1207	ROCK1	-1.02393	4.76333	-7.99704	2.4655e-12	3.74177e-11	17.6717
1215	FKBP2	1.02582	5.47982	7.98794	2.57847e-12	3.88744e-11	17.6278
1219	SH2D2A	1.1205	2.72912	7.98184	2.65714e-12	3.99291e-11	17.5983
1220	IFI27L2	1.03976	6.33573	7.98148	2.66182e-12	3.99349e-11	17.5966
1221	ITPRID2	-1.01186	5.09695	-7.98148	2.66189e-12	3.99349e-11	17.5966
1232	NDUFA11	1.22256	5.87474	7.96812	2.84283e-12	4.22687e-11	17.5321
1268	FLT3LG	1.36512	3.39106	7.89816	4.01057e-12	5.79382e-11	17.1949
1281	LRRC70	-1.75888	2.91253	-7.87768	4.43528e-12	6.34235e-11	17.0962
1285	CD7	1.53707	3.09233	7.87241	4.55154e-12	6.48833e-11	17.0709
1286	DNPH1	1.01443	2.44049	7.87096	4.58397e-12	6.52949e-11	17.0639
1308	ADGRG1	1.40908	3.12547	7.84491	5.20938e-12	7.29552e-11	16.9386
1314	H1.10	1.16299	3.81582	7.83883	5.36725e-12	7.48228e-11	16.9093
1320	NAIP	-1.25823	6.17374	-7.8244	5.761e-12	7.9942e-11	16.84
1321	DGCR6L	1.19903	3.66714	7.82426	5.765e-12	7.9942e-11	16.8393
1334	HRAS	1.04666	2.74055	7.80243	6.41634e-12	8.81068e-11	16.7344
1354	SMAP2	-1.17922	9.62786	-7.77629	7.29356e-12	9.86731e-11	16.6089
1359	STMN3	1.16279	3.07756	7.76929	7.54793e-12	1.01739e-10	16.5753
1372	CENPX	1.02214	4.07485	7.75374	8.14502e-12	1.08747e-10	16.5007
1400	SLC12A6	-1.04972	5.37603	-7.70671	1.02529e-11	1.34121e-10	16.2753
1432	NLRC4	-1.01758	5.42624	-7.65682	1.30835e-11	1.67363e-10	16.0365
1442	IL1RAP	-1.49301	4.09951	-7.65038	1.35011e-11	1.71507e-10	16.0057
1452	SIT1	1.11122	3.94939	7.63931	1.42506e-11	1.79781e-10	15.9528
1455	CCDC167	1.09592	5.30214	7.63798	1.43435e-11	1.8058e-10	15.9464
1469	CD3E	1.53577	6.32556	7.62101	1.55818e-11	1.94301e-10	15.8653
1476	OSBPL8	-1.1575	5.66287	-7.61329	1.61796e-11	2.00798e-10	15.8285
1482	PRDM5	-1.16461	1.94769	-7.61098	1.63627e-11	2.02248e-10	15.8174
1483	FGFBP2	1.68124	5.45931	7.60953	1.64793e-11	2.03471e-10	15.8105
1486	PLEKHF1	1.07187	1.81382	7.6091	1.65138e-11	2.03567e-10	15.8084
1489	SPOCK2	1.15457	4.31625	7.60089	1.71875e-11	2.11445e-10	15.7693
1491	CD274	-1.59729	3.76428	-7.60029	1.72386e-11	2.11789e-10	15.7664
1492	YOD1	-1.09189	3.42449	-7.59996	1.72663e-11	2.11987e-10	15.7648
1494	SLC26A8	-1.33263	3.61322	-7.59841	1.73972e-11	2.13308e-10	15.7574
1497	NEK7	-1.04975	5.47832	-7.59452	1.77301e-11	2.16875e-10	15.7388
1505	FBXL13	-1.11453	2.30048	-7.58797	1.8305e-11	2.22797e-10	15.7076
1508	CRISPLD2	-1.02766	5.67848	-7.58618	1.84653e-11	2.24302e-10	15.6991
1512	SORL1	-1.17649	7.18644	-7.57792	1.92235e-11	2.32894e-10	15.6597
1523	GYG1	-1.22771	6.91098	-7.55927	2.10517e-11	2.53201e-10	15.5707
1531	NUDT1	1.14057	3.94537	7.55212	2.17969e-11	2.60795e-10	15.5366
1533	ALOX5AP	-1.02642	10.3892	-7.54982	2.20419e-11	2.63381e-10	15.5257
1535	CD2	1.4246	5.54485	7.54353	2.27277e-11	2.71222e-10	15.4957
1538	TNFAIP6	-1.48472	6.48854	-7.54212	2.28838e-11	2.72552e-10	15.489
1541	CXCR3	1.00454	1.57554	7.5407	2.30432e-11	2.73917e-10	15.4822
1556	TSPAN2	-1.11635	4.68057	-7.52237	2.51914e-11	2.96565e-10	15.3949
1569	TRAPPC6A	1.31635	3.32929	7.51047	2.66916e-11	3.11623e-10	15.3383
1574	CD3D	1.49454	6.94889	7.50047	2.80214e-11	3.26109e-10	15.2907
1581	VNN1	-1.94929	5.78965	-7.49721	2.84685e-11	3.29845e-10	15.2752
1582	TMEM252	-1.0094	1.77826	-7.4958	2.86653e-11	3.31916e-10	15.2685
1587	TBX21	1.28905	3.64074	7.49153	2.92652e-11	3.37795e-10	15.2482
1601	TLR1	-1.03396	6.57414	-7.47725	3.1367e-11	3.58888e-10	15.1803
1614	ANO9	1.1436	1.88029	7.46163	3.3838e-11	3.84043e-10	15.1061
1616	KIF27	-1.11449	2.5297	-7.46098	3.39449e-11	3.84779e-10	15.103
1617	C8orf88	-1.0144	1.51272	-7.46052	3.40212e-11	3.85405e-10	15.1008
1623	GZMA	1.49965	6.84399	7.45354	3.51937e-11	3.97214e-10	15.0676
1628	FUOM	1.20759	2.60905	7.44739	3.62594e-11	4.07985e-10	15.0384
1631	MTARC1	-1.17626	4.23322	-7.44321	3.70023e-11	4.15487e-10	15.0186
1637	SDHAF3	-1.02928	4.63514	-7.43741	3.80578e-11	4.25866e-10	14.991
1650	DICER1	-1.07331	4.32821	-7.42313	4.07851e-11	4.52789e-10	14.9233
1651	CCL5	1.25379	8.02405	7.42252	4.09054e-11	4.53849e-10	14.9204
1653	MEGF9	-1.14313	6.90975	-7.42184	4.10406e-11	4.54798e-10	14.9172
1660	EPAS1	-1.12737	1.63388	-7.41688	4.20405e-11	4.63914e-10	14.8936
1666	KBTBD7	-1.37695	3.62319	-7.41089	4.32781e-11	4.75852e-10	14.8652
1667	GZMB	1.59594	6.55765	7.41043	4.33755e-11	4.7642e-10	14.863
1668	SAMSN1	-1.6139	6.84891	-7.41039	4.33818e-11	4.7642e-10	14.8629
1679	TXNIP	-1.08005	11.4193	-7.39804	4.60563e-11	5.02477e-10	14.8043
1698	CCNJL	-1.0727	3.85921	-7.37803	5.07434e-11	5.47419e-10	14.7095
1701	RPS27	1.02264	13.2867	7.37382	5.17858e-11	5.5768e-10	14.6896
1727	METTL26	1.1011	3.68293	7.34104	6.06822e-11	6.43646e-10	14.5345
1737	ST6GALNAC3	-1.27104	2.17052	-7.32124	6.67748e-11	7.04191e-10	14.4408
1749	ZNF608	-1.80114	2.39824	-7.30883	7.08974e-11	7.42538e-10	14.3822
1765	KCNE1	-1.33174	2.23561	-7.29703	7.50527e-11	7.78932e-10	14.3265
1766	PRR5	1.05817	2.2608	7.29569	7.55393e-11	7.83538e-10	14.3202
1768	NDUFS8	1.12653	3.51378	7.29347	7.6354e-11	7.91093e-10	14.3097
1772	HGF	-1.11049	2.72793	-7.29136	7.71347e-11	7.97378e-10	14.2997
1807	CDK5RAP2	-1.44455	4.17811	-7.24506	9.64243e-11	9.77477e-10	14.0814
1808	APBB1	1.03352	2.55906	7.24349	9.71546e-11	9.84335e-10	14.074
1838	CLEC4D	-1.54349	6.34904	-7.21822	1.09721e-10	1.09351e-09	13.955
1839	CASP5	-1.35287	4.65497	-7.21764	1.10032e-10	1.09602e-09	13.9523
1856	PCED1B	1.06298	3.13308	7.20244	1.18378e-10	1.16835e-09	13.8807
1867	CD5	1.20361	3.08584	7.19381	1.23391e-10	1.21065e-09	13.8402
1878	PRDX2	1.19709	5.36289	7.18233	1.30392e-10	1.27169e-09	13.7862
1893	CD27	1.35547	4.58864	7.16416	1.42278e-10	1.37678e-09	13.7009
1902	GRAP	1.10036	3.26137	7.15818	1.46423e-10	1.41019e-09	13.6728
1908	IL18R1	-2.21662	5.26298	-7.15515	1.48572e-10	1.42578e-09	13.6586
1938	FKBP5	-1.7917	7.30524	-7.12443	1.7216e-10	1.62726e-09	13.5145
1961	LSMEM1	-1.00794	3.96267	-7.10625	1.8783e-10	1.75455e-09	13.4293
1962	RPS6KA3	-1.06132	4.76411	-7.10571	1.88313e-10	1.75816e-09	13.4268
1976	MCEMP1	-1.62972	7.86875	-7.08057	2.124e-10	1.969e-09	13.3091
1996	RGS2	-1.00017	11.8517	-7.05624	2.38619e-10	2.1899e-09	13.1953
2002	CCDC71L	-1.00459	3.63435	-7.04659	2.49886e-10	2.28548e-09	13.1502
2012	PDZD4	1.06851	1.98876	7.03846	2.59782e-10	2.36516e-09	13.1123
2022	S100A12	-1.40758	12.1734	-7.03149	2.68575e-10	2.43312e-09	13.0797
2036	PSTPIP2	-1.15254	5.79172	-7.01697	2.87857e-10	2.58986e-09	13.012
2060	ARL4C	1.12147	4.6132	6.98162	3.40716e-10	3.02972e-09	12.8472
2064	HOPX	1.11417	4.51407	6.97845	3.45902e-10	3.06937e-09	12.8324
2066	TBC1D8	-1.04889	3.67004	-6.97749	3.47478e-10	3.08088e-09	12.828
2071	CSGALNACT2	-1.43758	6.10123	-6.97478	3.52001e-10	3.11345e-09	12.8154
2080	GZMH	1.80501	6.3299	6.96116	3.75577e-10	3.30761e-09	12.752
2086	TCP11L2	-1.09914	4.39879	-6.95076	3.94646e-10	3.46554e-09	12.7036
2104	KLRK1	1.42762	5.52368	6.92868	4.38358e-10	3.81646e-09	12.601
2106	MYDGF	1.04716	6.03242	6.92408	4.4804e-10	3.89705e-09	12.5796
2107	SELENOM	1.06675	1.69589	6.92223	4.51991e-10	3.92955e-09	12.5711
2109	PADI2	-1.01613	6.43191	-6.92069	4.55318e-10	3.95472e-09	12.5639
2118	DDX60L	-1.06008	6.02134	-6.91558	4.66508e-10	4.03432e-09	12.5402
2156	RRAS	1.03271	4.115	6.87715	5.59892e-10	4.757e-09	12.3619
2166	HMGB2	-1.12919	9.37137	-6.86831	5.83845e-10	4.93762e-09	12.321
2175	LRRK2	-1.21763	6.53309	-6.86002	6.07244e-10	5.11425e-09	12.2826
2187	MIF	1.30642	3.7594	6.85112	6.33417e-10	5.30541e-09	12.2414
2198	IL18RAP	-1.6041	7.40478	-6.8424	6.60137e-10	5.50154e-09	12.201
2216	ALPL	-1.2903	7.92036	-6.81912	7.37012e-10	6.09233e-09	12.0935
2219	TARP	1.28617	5.10463	6.81675	7.45313e-10	6.15261e-09	12.0825
2220	KATNBL1	-1.03608	4.70978	-6.81585	7.48504e-10	6.17617e-09	12.0783
2239	CD74	1.05203	9.50178	6.79412	8.2949e-10	6.78341e-09	11.978
2257	PRRG4	-1.24262	3.98285	-6.7797	8.87963e-10	7.20678e-09	11.9115
2259	CD320	1.20112	3.01736	6.7781	8.94698e-10	7.25502e-09	11.9041
2264	TSC22D3	-1.0592	10.3221	-6.77403	9.12054e-10	7.37942e-09	11.8854
2291	IL2RB	1.19938	3.54857	6.74369	1.05239e-09	8.41451e-09	11.7456
2292	TNFRSF25	1.25804	2.64158	6.74276	1.05698e-09	8.44754e-09	11.7414
2328	GRB10	-1.75126	3.50621	-6.70015	1.29179e-09	1.01645e-08	11.5456
2336	F2RL1	-1.06843	4.90946	-6.68979	1.35628e-09	1.06354e-08	11.498
2348	CD52	1.12265	10.6466	6.6845	1.39043e-09	1.08475e-08	11.4737
2354	KLRB1	1.252	4.92067	6.67654	1.44342e-09	1.12294e-08	11.4372
2356	SKAP1	1.09455	4.37539	6.67596	1.44737e-09	1.12534e-08	11.4346
2358	S1PR5	1.29981	3.1263	6.67454	1.45706e-09	1.13191e-08	11.4281
2367	CD79B	1.20916	5.23116	6.66694	1.51003e-09	1.16859e-08	11.3932
2378	HLA.DMB	1.09852	6.10166	6.65834	1.57222e-09	1.21084e-08	11.3538
2386	HERC3	-1.06771	4.36965	-6.65168	1.62209e-09	1.24532e-08	11.3234
2400	BCL7C	1.13442	3.94243	6.64261	1.69259e-09	1.29187e-08	11.2818
2426	GADD45GIP1	1.1789	2.84632	6.61926	1.88837e-09	1.42585e-08	11.175
2432	POLR2L	1.12401	3.88756	6.61531	1.92365e-09	1.44891e-08	11.157
2444	NDUFB7	1.34766	4.71807	6.60293	2.03843e-09	1.52782e-08	11.1004
2465	C19orf48	1.02872	2.85911	6.5827	2.24066e-09	1.66509e-08	11.0082
2467	SAMD3	1.06381	3.64515	6.5818	2.25016e-09	1.67079e-08	11.004
2478	GALNT14	-1.25317	3.63943	-6.57432	2.33021e-09	1.72255e-08	10.9699
2487	ZNF593	1.0442	2.86151	6.56186	2.46992e-09	1.81844e-08	10.9131
2495	OSBPL1A	-1.14913	2.60011	-6.55886	2.50475e-09	1.83896e-08	10.8995
2519	NME3	1.0868	1.94807	6.54144	2.7168e-09	1.97498e-08	10.8202
2546	ZNF683	1.1671	1.21461	6.51418	3.08486e-09	2.2195e-08	10.6963
2547	HLA.DQA1	1.27725	4.86676	6.51392	3.08869e-09	2.22138e-08	10.6951
2565	AVIL	-1.02543	2.91659	-6.49853	3.31806e-09	2.36848e-08	10.6252
2568	HIF1A	-1.01842	5.83727	-6.49793	3.32731e-09	2.37343e-08	10.6225
2577	CLEC4E	-1.18538	8.14711	-6.49012	3.45054e-09	2.45274e-08	10.5871
2596	PELI1	-1.0511	6.16136	-6.47978	3.62039e-09	2.55464e-08	10.5402
2602	PPDPF	1.18471	4.26654	6.46958	3.7963e-09	2.67258e-08	10.494
2603	IL1R2	-2.48452	8.65767	-6.4685	3.81531e-09	2.68494e-08	10.4891
2617	ROPN1L	-1.01046	4.55828	-6.45667	4.03079e-09	2.8214e-08	10.4355
2644	ABCA1	-1.15726	3.5138	-6.4229	4.7144e-09	3.2662e-08	10.2828
2652	MRPL41	1.033	2.93836	6.41924	4.79489e-09	3.31194e-08	10.2663
2656	PFKFB2	-2.00261	3.8564	-6.41562	4.87592e-09	3.36187e-08	10.25
2677	RASSF7	1.04395	2.27843	6.39528	5.35755e-09	3.66603e-08	10.1582
2684	RGS18	-1.04	8.06909	-6.38872	5.5224e-09	3.76898e-08	10.1287
2703	CYSTM1	-1.14907	7.84623	-6.37082	5.99889e-09	4.0654e-08	10.048
2714	SIRPG	1.07554	3.15889	6.35691	6.39693e-09	4.31757e-08	9.98541
2721	AQP3	1.05021	4.09596	6.35395	6.48473e-09	4.36558e-08	9.97212
2744	ERV3.1.ZNF117	-1.01329	2.22895	-6.33797	6.98094e-09	4.66023e-08	9.90029
2762	SPON2	1.2226	2.66532	6.32679	7.35022e-09	4.87478e-08	9.85007
2777	CYP1B1	-1.40185	4.77809	-6.31312	7.82791e-09	5.16355e-08	9.78873
2792	FCGR3B	-1.11715	11.7692	-6.30159	8.25428e-09	5.41554e-08	9.73707
2801	FAM174C	1.25163	2.62463	6.29464	8.52241e-09	5.57349e-08	9.70594
2813	LRRC6	-1.099	2.69163	-6.28678	8.83617e-09	5.75403e-08	9.67072
2822	IRS2	-1.25139	4.12084	-6.28013	9.11032e-09	5.91364e-08	9.64097
2828	C7orf50	1.09484	2.80287	6.27421	9.3615e-09	6.06379e-08	9.61448
2840	SORT1	-1.0188	4.71647	-6.26262	9.87328e-09	6.36827e-08	9.56264
2873	CLIC3	1.01656	1.14023	6.23591	1.11599e-08	7.11549e-08	9.44336
2877	FAM102A	1.00963	2.85064	6.23124	1.14014e-08	7.2593e-08	9.42253
2887	UGCG	-1.15451	4.89814	-6.2208	1.19598e-08	7.5885e-08	9.37597
2894	LIME1	1.23451	2.67705	6.21529	1.22651e-08	7.76337e-08	9.35143
2904	PXYLP1	-1.09346	3.13123	-6.20323	1.29608e-08	8.17549e-08	9.29772
2915	CNTNAP3	-1.3334	2.47497	-6.19266	1.3602e-08	8.54756e-08	9.25072
2917	CD4	1.26123	5.2801	6.18893	1.38363e-08	8.68886e-08	9.23409
2921	C3orf86	-1.15403	6.04032	-6.18361	1.41764e-08	8.89022e-08	9.21046
2929	IDI1	-1.00066	6.05273	-6.1759	1.46843e-08	9.18355e-08	9.1762
2968	ZNF429	-1.0552	3.23104	-6.14259	1.70934e-08	1.05497e-07	9.02836
2996	DUSP1	-1.07273	10.0807	-6.11515	1.93669e-08	1.18412e-07	8.90686
3039	MZT2B	1.1647	3.26172	6.07755	2.29725e-08	1.3847e-07	8.74077
3058	DUSP2	1.15468	2.91353	6.06631	2.41733e-08	1.44803e-07	8.69122
3066	ATP5F1D	1.302	3.18512	6.05933	2.49503e-08	1.49067e-07	8.66045
3071	SOCS3	-1.03025	6.6939	-6.05374	2.559e-08	1.5264e-07	8.63583
3074	PLAAT4	1.16544	6.82871	6.05287	2.56916e-08	1.53097e-07	8.63197
3088	SDF2L1	1.08375	3.50514	6.04653	2.64389e-08	1.56835e-07	8.60409
3106	SIVA1	1.05061	2.70042	6.02669	2.89216e-08	1.70569e-07	8.51681
3113	AIM2	-1.22829	5.42959	-6.02101	2.96732e-08	1.74608e-07	8.49187
3170	CA4	-1.3017	6.19028	-5.97053	3.72594e-08	2.15305e-07	8.27055
3171	RESF1	-1.06292	7.09912	-5.96974	3.73924e-08	2.16006e-07	8.26709
3191	ELOB	1.0643	6.56064	5.94556	4.16882e-08	2.39312e-07	8.1614
3198	RPS26	1.1512	7.64977	5.93904	4.29287e-08	2.45893e-07	8.13291
3199	GADD45A	-1.25759	5.04831	-5.93836	4.30601e-08	2.46569e-07	8.12994
3261	ERLIN1	-1.05306	4.66332	-5.88125	5.56218e-08	3.12444e-07	7.88124
3281	HLA.DQB1	1.32695	5.76365	5.86566	5.96383e-08	3.32964e-07	7.81352
3304	PTPRC	-1.0815	9.01025	-5.84789	6.45624e-08	3.57946e-07	7.73648
3331	HPGD	-1.7276	3.45763	-5.83559	6.8205e-08	3.75076e-07	7.68318
3373	LFNG	1.00701	4.89124	5.80786	7.71692e-08	4.19088e-07	7.5633
3389	CD8A	1.23967	4.74239	5.79819	8.05592e-08	4.35433e-07	7.52156
3525	OLAH	-2.70368	3.71892	-5.69316	1.28261e-07	6.66523e-07	7.07029
3536	CD177	-2.62689	6.3119	-5.68134	1.35115e-07	6.99956e-07	7.0198
3587	NDUFS7	1.11399	2.56612	5.65045	1.54787e-07	7.9046e-07	6.888
3630	C20orf27	1.03822	4.20823	5.61595	1.80088e-07	9.08777e-07	6.74123
3638	CD8B	1.21262	3.79177	5.60631	1.87861e-07	9.45916e-07	6.70028
3639	CD160	1.10573	2.20459	5.6056	1.88441e-07	9.48577e-07	6.69729
3664	HSPB1	1.16053	2.91723	5.58207	2.08869e-07	1.04423e-06	6.59755
3687	MZT2A	1.09188	2.04078	5.56727	2.22818e-07	1.10691e-06	6.53492
3698	CSF1R	1.02513	4.67949	5.56282	2.2719e-07	1.12538e-06	6.51609
3701	TRABD2A	1.08654	2.69801	5.55951	2.30489e-07	1.1408e-06	6.50212
3720	FCRL6	1.26131	3.30466	5.5435	2.47144e-07	1.21699e-06	6.43453
3738	TPST1	-1.64477	5.09642	-5.52681	2.65767e-07	1.30239e-06	6.36417
3742	IL1RL1	-1.13584	1.63995	-5.52456	2.68379e-07	1.31378e-06	6.3547
3787	TPPP3	1.21837	1.78385	5.48682	3.1617e-07	1.52934e-06	6.19601
3824	FLT3	-1.31056	3.04936	-5.45806	3.58082e-07	1.71531e-06	6.07551
3849	XCL2	1.11777	3.31528	5.4399	3.87305e-07	1.84325e-06	5.99958
3857	ARG1	-2.28054	6.55263	-5.43547	3.94786e-07	1.87495e-06	5.98107
3898	GZMK	1.13704	4.48043	5.4069	4.46518e-07	2.09833e-06	5.86193
3902	TCF7	1.2535	4.08855	5.40233	4.5538e-07	2.13779e-06	5.84292
3915	SLC5A9	-1.09452	1.98382	-5.39397	4.7205e-07	2.20869e-06	5.80814
3971	TIAM2	-1.16399	1.79399	-5.35474	5.586e-07	2.57679e-06	5.64533
3997	LGALS2	2.30427	5.13925	5.33528	6.07135e-07	2.78246e-06	5.56478
3998	EIF2AK2	-1.00128	4.2219	-5.33279	6.13634e-07	2.81154e-06	5.55449
4001	LIPN	-1.15691	3.42832	-5.32962	6.22e-07	2.84774e-06	5.5414
4050	DPM3	1.04239	3.55431	5.29327	7.2634e-07	3.28521e-06	5.39151
4119	CSGALNACT1	-1.0095	4.59631	-5.24817	8.79805e-07	3.91267e-06	5.20633
4129	MAL	1.29329	3.8577	5.23989	9.11266e-07	4.04276e-06	5.1724
4164	DHRS9	-1.13587	6.42861	-5.21082	1.03055e-06	4.53353e-06	5.05362
4227	TRIM22	-1.04318	8.213	-5.16419	1.25442e-06	5.43613e-06	4.86388
4234	PLSCR1	-1.01293	6.62293	-5.15912	1.28146e-06	5.54413e-06	4.8433
4250	KLRF1	1.12784	4.51301	5.15054	1.32854e-06	5.72617e-06	4.80848
4254	CARD17	-1.2264	2.86158	-5.14755	1.3453e-06	5.79265e-06	4.79639
4435	GIMAP5	1.09876	5.74762	5.01368	2.35147e-06	9.71234e-06	4.25805
4454	PLIN5	-1.00671	3.58016	-5.00014	2.48697e-06	1.02282e-05	4.20409
4479	ANKRD34B	-1.17057	1.98255	-4.97921	2.71169e-06	1.10901e-05	4.12079
4526	CCR7	1.1562	4.27263	4.94265	3.15236e-06	1.27585e-05	3.97584
4563	ANKRD22	-1.2026	3.42635	-4.91759	3.49402e-06	1.40237e-05	3.87682
4598	FFAR3	-1.02315	2.04184	-4.8921	3.87825e-06	1.54506e-05	3.77646
4640	PRUNE2	-1.02911	1.56344	-4.86699	4.297e-06	1.69639e-05	3.67787
4647	MACIR	-1.57221	3.55423	-4.85721	4.47167e-06	1.76242e-05	3.63956
4675	IGHM	1.82405	7.71959	4.83737	4.84765e-06	1.89945e-05	3.56196
4796	TGFBI	1.02	5.37473	4.74544	7.02919e-06	2.68475e-05	3.20508
4823	ITM2C	1.14766	5.05803	4.72969	7.48821e-06	2.84406e-05	3.14437
4905	CD79A	1.10848	5.3014	4.67526	9.30991e-06	3.47613e-05	2.9355
5001	CLEC10A	1.03111	2.72786	4.60813	1.2154e-05	4.45184e-05	2.68003
5075	TMIGD3	-1.40605	2.96365	-4.5668	1.43064e-05	5.16347e-05	2.5239
5132	DAAM2	-1.76337	2.58493	-4.52885	1.6604e-05	5.92658e-05	2.38139
5147	IGHA2	1.6821	5.3846	4.51985	1.71992e-05	6.12115e-05	2.34769
5223	TNNT1	1.2939	2.84517	4.46766	2.10796e-05	7.39298e-05	2.1532
5458	ZDHHC19	-1.46579	2.60374	-4.31015	3.86233e-05	0.000129627	1.57532
5465	SAP30	-1.0804	5.07468	-4.30578	3.92697e-05	0.000131627	1.5595
5605	MZB1	1.59815	6.02223	4.23008	5.22837e-05	0.000170871	1.28697
5708	TMEM119	-1.0289	2.11662	-4.16192	6.7475e-05	0.000216539	1.04445
5747	HLA.DQA2	1.49985	2.6658	4.13996	7.32139e-05	0.000233362	0.966916
5827	CCNA1	-1.22554	2.22762	-4.09018	8.80103e-05	0.000276673	0.792207
5989	PTGDS	1.04104	2.52767	3.98662	0.000128507	0.000393053	0.433532
6036	ADAMTS2	-1.06564	2.01088	-3.96059	0.000141199	0.000428509	0.344423
6050	CX3CR1	1.07525	5.29329	3.95192	0.000145687	0.000441106	0.31483
6057	IGHG3	1.82614	6.41607	3.9479	0.000147811	0.000447021	0.301141
6096	ECHDC3	-1.23337	3.14782	-3.92978	0.000157772	0.000474092	0.239493
6161	ZBTB16	-1.05481	2.42562	-3.90853	0.00017027	0.000506251	0.167459
6184	IGHA1	1.91432	8.23624	3.8993	0.000175987	0.000521302	0.136269
6298	S100P	-1.14396	10.1653	-3.82953	0.000225534	0.000655976	-0.0977954
6323	MAOA	-1.58172	1.87529	-3.81346	0.000238699	0.000691521	-0.151265
6408	RPH3A	-1.13788	3.97807	-3.76198	0.000285973	0.000817487	-0.32142
6500	MT2A	1.11553	6.03976	3.69698	0.000358444	0.00101015	-0.533776
6645	CD163	-1.093	6.03949	-3.621	0.000465252	0.00128254	-0.778477
6670	FCER1A	1.28928	3.08983	3.61169	0.000480247	0.00131891	-0.8082
6731	GATD3B	1.03027	4.16922	3.5796	0.000535502	0.00145733	-0.910183
6756	CA1	-1.39853	2.69006	-3.56659	0.000559585	0.0015171	-0.951349
6769	IGHG4	1.40791	4.37335	3.55931	0.000573484	0.00155194	-0.974301
6792	IGLC7	1.36229	3.20451	3.54521	0.000601365	0.00162188	-1.01869
6881	IGLC3	1.68468	9.23533	3.50045	0.000698604	0.00185976	-1.15872
6900	IGLL5	1.37061	5.61689	3.48774	0.000728825	0.00193487	-1.19825
7004	RPSAP58	1.0697	4.92291	3.42695	0.000891103	0.00233056	-1.38566
7025	IGHG2	1.51364	6.89257	3.41269	0.000933816	0.00243497	-1.42924
7313	CLC	1.07178	8.02864	3.2561	0.00154808	0.00387772	-1.89839
7603	IGLC2	1.59715	10.6223	3.10772	0.00246247	0.00593285	-2.32654
7800	HLA.DRB5	1.38312	4.66131	3.02037	0.00321385	0.00754761	-2.57091
7825	IGLC1	1.44716	9.01468	3.01002	0.00331569	0.00776189	-2.59947
7856	ORM1	-1.03036	6.42657	-2.99297	0.00349008	0.0081379	-2.64636
7903	VSIG4	-1.11219	4.07298	-2.96865	0.00375354	0.00870015	-2.71287
7963	HLA.DRB4	1.7641	4.29751	2.93745	0.00411832	0.00947292	-2.79752
8093	IGHG1	1.60091	9.54086	2.87838	0.00489992	0.0110907	-2.95574
8345	IFI27	1.64005	6.92822	2.76864	0.00672325	0.0147581	-3.24245
8425	IGKC	1.32556	12.0261	2.73139	0.00747092	0.0162436	-3.3376
8686	HBA2	1.13051	10.6622	2.6112	0.0104283	0.0219923	-3.63706
9586	MMP8	-1.05711	5.28182	-2.26689	0.0255768	0.0488751	-4.42908

## Sheet: Table 4
ID	Description	setSize	enrichmentScore	NES	pvalue	p.adjust	qvalues	rank	leading_edge	core_enrichment
GOBP_DEFENSE_RESPONSE	GOBP_DEFENSE_RESPONSE	213	-0.532611	-1.61686	5.77e-06	0.10495	0.10339	155	tags=25%, list=21%, signal=28%	IGFBP4/VNN1/HSP90AB1/SAA1/PSG3/KRT16/KRT1/NCAM1/PSMB3/DEFA3/PSMA2/SAA2/REG3A/WFDC2/PSMA4/LCN2/ACTR2/PSMB4/CORO1A/CSF1R/COLEC10/SNCA/ACTR3/SDC1/CHGA/LTF/PSMB9/PSMA1/SPP1/DHX9/CD163/IL1RL1/IGHV3-16/PSMA3/IGHA2/PLA2G2A/ICAM1/MPO/VSIG4/MMP9/PRG2/PTX3/TIMP1/DDT/PSMA5/S100A8/ELANE/PSMA7/B4GALT1/PSMB8/MRC1/CHI3L1/S100A9
WP_IL1_AND_MEGAKARYOCYTES_IN_OBESITY	WP_IL1_AND_MEGAKARYOCYTES_IN_OBESITY	6	-0.969383	-1.70671	1.7e-05	0.154267	0.151974	28	tags=83%, list=4%, signal=81%	ICAM1/MMP9/TIMP1/S100A9/SELENBP1
ZAK_PBMC_MRKAD5_HIV_1_GAG_POL_NEF_AGE_20_50YO_1DY_UP	ZAK_PBMC_MRKAD5_HIV_1_GAG_POL_NEF_AGE_20_50YO_1DY_UP	51	-0.676779	-1.78063	2.6e-05	0.15744	0.155099	105	tags=33%, list=14%, signal=31%	TYMP/PSMA4/CSF1R/CLIC1/LAP3/SNCA/GOLM1/CTSD/LTF/PSMB9/CSRP1/CD163/ICAM1/TIMP1/PSMB8/S100A9/NUCB1
GOBP_INFLAMMATORY_RESPONSE	GOBP_INFLAMMATORY_RESPONSE	83	-0.604719	-1.69951	3.89e-05	0.177041	0.17441	155	tags=33%, list=21%, signal=29%	IGFBP4/VNN1/SAA1/KRT16/KRT1/SAA2/REG3A/PSMB4/CSF1R/SNCA/SDC1/PSMA1/SPP1/DHX9/CD163/IL1RL1/PLA2G2A/ICAM1/MMP9/PTX3/TIMP1/DDT/S100A8/ELANE/B4GALT1/CHI3L1/S100A9
GOBP_CARTILAGE_DEVELOPMENT	GOBP_CARTILAGE_DEVELOPMENT	11	-0.892575	-1.79484	5.85e-05	0.177574	0.174934	21	tags=27%, list=3%, signal=27%	TIMP1/TSKU/CHI3L1
GOBP_CONNECTIVE_TISSUE_DEVELOPMENT	GOBP_CONNECTIVE_TISSUE_DEVELOPMENT	11	-0.892575	-1.79484	5.85e-05	0.177574	0.174934	21	tags=27%, list=3%, signal=27%	TIMP1/TSKU/CHI3L1
GOBP_REGULATION_OF_RESPONSE_TO_STRESS	GOBP_REGULATION_OF_RESPONSE_TO_STRESS	101	-0.571031	-1.64058	7.43e-05	0.193238	0.190365	154	tags=32%, list=21%, signal=29%	VNN1/HSPA1B/HSP90AB1/SAA1/NPM1/KRT1/PSMB3/PSMA2/REG3A/PSMA4/ACTR2/PSMB4/SNCA/PSMB9/PSMA1/SPP1/TXN/NUP214/FBLN5/DHX9/IL1RL1/PSMA3/PLA2G2A/VSIG4/MMP9/DDT/PSMA5/S100A8/ELANE/PSMA7/PSMB8/S100A9
GOBP_POST_TRANSLATIONAL_PROTEIN_MODIFICATION	GOBP_POST_TRANSLATIONAL_PROTEIN_MODIFICATION	61	-0.648579	-1.75489	8.76e-05	0.199339	0.196376	102	tags=34%, list=14%, signal=32%	PSMB3/PSMA2/PSMA4/PSMB4/FSTL1/GOLM1/TNC/PSMB9/PSMA1/SPP1/IGFBP1/APOA5/PRKCSH/PSMA3/LGALS1/TIMP1/SPARCL1/PSMA5/PSMA7/PSMB8/NUCB1
REACTOME_DISEASES_OF_IMMUNE_SYSTEM	REACTOME_DISEASES_OF_IMMUNE_SYSTEM	6	-0.952935	-1.67775	0.000122657	0.223236	0.219918	16	tags=50%, list=2%, signal=49%	CD14/S100A8/S100A9
REACTOME_IRAK4_DEFICIENCY_TLR2_4	REACTOME_IRAK4_DEFICIENCY_TLR2_4	6	-0.952935	-1.67775	0.000122657	0.223236	0.219918	16	tags=50%, list=2%, signal=49%	CD14/S100A8/S100A9
GOBP_REGULATION_OF_CELLULAR_KETONE_METABOLIC_PROCESS	GOBP_REGULATION_OF_CELLULAR_KETONE_METABOLIC_PROCESS	24	-0.775778	-1.82754	0.000143888	0.238069	0.23453	129	tags=62%, list=18%, signal=53%	PSMB3/FABP3/CES1/PSMA2/PSMA4/FABP1/PSMB4/PSMB9/PSMA1/BHMT/APOA5/PSMA3/PSMA5/PSMA7/PSMB8
GOBP_NEGATIVE_REGULATION_OF_RESPONSE_TO_STIMULUS	GOBP_NEGATIVE_REGULATION_OF_RESPONSE_TO_STIMULUS	104	-0.561337	-1.61994	0.000158718	0.240723	0.237144	172	tags=35%, list=23%, signal=31%	HYOU1/PSMB5/NRP1/SEMA4B/YWHAB/IGFBP4/VNN1/HSPA1B/SAA1/KRT1/PSMB3/PSMA2/PEBP1/PSMA4/PSMB4/SNCA/IGFBP2/LTF/PSMB9/PSMA1/SPP1/TXN/ACAA2/IGFBP1/IL1RL1/PSMA3/DAG1/ICAM1/VSIG4/MMP9/DDT/PSMA5/TSKU/ELANE/PSMA7/PSMB8
MARTENS_TRETINOIN_RESPONSE_UP	MARTENS_TRETINOIN_RESPONSE_UP	39	-0.681929	-1.72335	0.000185769	0.244228	0.240597	33	tags=26%, list=4%, signal=26%	CTSD/CD93/PLA2G2A/ICAM1/TSKU/S100A8/KRT9/CHI3L1/COL6A1/S100A9
CHEOK_RESPONSE_TO_HD_MTX_UP	CHEOK_RESPONSE_TO_HD_MTX_UP	6	-0.947027	-1.66735	0.000188198	0.244228	0.240597	27	tags=50%, list=4%, signal=49%	MPO/S100A8/S100A9
GOBP_REGULATION_OF_DEFENSE_RESPONSE	GOBP_REGULATION_OF_DEFENSE_RESPONSE	57	-0.626121	-1.67371	0.000201286	0.244228	0.240597	150	tags=40%, list=20%, signal=35%	HSP90AB1/SAA1/KRT1/PSMB3/PSMA2/PSMA4/PSMB4/SNCA/PSMB9/PSMA1/DHX9/IL1RL1/PSMA3/PLA2G2A/VSIG4/MMP9/DDT/PSMA5/S100A8/ELANE/PSMA7/PSMB8/S100A9
BOYLAN_MULTIPLE_MYELOMA_PCA1_UP	BOYLAN_MULTIPLE_MYELOMA_PCA1_UP	22	-0.77064	-1.78505	0.000234728	0.267003	0.263035	60	tags=45%, list=8%, signal=43%	PRTN3/LCN2/LTF/IGHA2/MPO/MMP9/PRG2/S100A8/ELANE/S100A9
GOBP_DEFENSE_RESPONSE_TO_OTHER_ORGANISM	GOBP_DEFENSE_RESPONSE_TO_OTHER_ORGANISM	166	-0.511871	-1.5327	0.000292343	0.312978	0.308326	137	tags=22%, list=19%, signal=23%	KRT16/KRT1/NCAM1/PSMB3/DEFA3/PSMA2/WFDC2/PSMA4/LCN2/ACTR2/PSMB4/CORO1A/CSF1R/COLEC10/SNCA/ACTR3/CHGA/LTF/PSMB9/PSMA1/DHX9/IGHV3-16/PSMA3/IGHA2/PLA2G2A/ICAM1/MPO/VSIG4/PRG2/PTX3/PSMA5/S100A8/ELANE/PSMA7/PSMB8/MRC1/S100A9
GSE6269_E_COLI_VS_STREP_PNEUMO_INF_PBMC_DN	GSE6269_E_COLI_VS_STREP_PNEUMO_INF_PBMC_DN	30	-0.709288	-1.73109	0.000311278	0.314736	0.310058	134	tags=43%, list=18%, signal=37%	PRTN3/ASL/PYGL/LCN2/CTSD/MYO5A/LTF/CD163/MMP9/PTX3/ELANE/CHI3L1/S100A9
REACTOME_REGULATION_OF_INSULIN_LIKE_GROWTH_FACTOR_IGF_TRANSPORT_AND_UPTAKE_BY_INSULIN_LIKE_GROWTH_FACTOR_BINDING_PROTEINS_IGFBPS	REACTOME_REGULATION_OF_INSULIN_LIKE_GROWTH_FACTOR_IGF_TRANSPORT_AND_UPTAKE_BY_INSULIN_LIKE_GROWTH_FACTOR_BINDING_PROTEINS_IGFBPS	52	-0.632686	-1.6637	0.000371285	0.332455	0.327514	85	tags=23%, list=12%, signal=22%	FSTL1/GOLM1/IGFBP2/TNC/SPP1/IGFBP1/APOA5/PRKCSH/LGALS1/TIMP1/SPARCL1/NUCB1
GOBP_REGULATION_OF_SMALL_MOLECULE_METABOLIC_PROCESS	GOBP_REGULATION_OF_SMALL_MOLECULE_METABOLIC_PROCESS	40	-0.673497	-1.7041	0.000383974	0.332455	0.327514	155	tags=50%, list=21%, signal=42%	PSMB5/IGFBP4/SLC4A1/PSMB3/FABP3/CES1/PSMA2/PSMA4/FABP1/PSMB4/SNCA/PSMB9/PSMA1/BHMT/NUP214/APOA5/PSMA3/PSMA5/PSMA7/PSMB8
GSE21360_PRIMARY_VS_TERTIARY_MEMORY_CD8_TCELL_DN	GSE21360_PRIMARY_VS_TERTIARY_MEMORY_CD8_TCELL_DN	12	-0.836798	-1.72954	0.000416196	0.332455	0.327514	105	tags=58%, list=14%, signal=51%	TYMP/BPGM/PSMB9/TXN/ICAM1/PSMB8/NUCB1
TAKEDA_TARGETS_OF_NUP98_HOXA9_FUSION_8D_DN	TAKEDA_TARGETS_OF_NUP98_HOXA9_FUSION_8D_DN	19	-0.756567	-1.69237	0.000458645	0.332455	0.327514	118	tags=37%, list=16%, signal=32%	PYGL/KRT86/CD163/MMP9/MRC1/CHI3L1/S100A9
GOBP_RESPONSE_TO_FUNGUS	GOBP_RESPONSE_TO_FUNGUS	11	-0.860861	-1.73106	0.00046846	0.332455	0.327514	64	tags=73%, list=9%, signal=67%	DEFA3/CHGA/LTF/MPO/PTX3/S100A8/ELANE/S100A9
GOBP_CELLULAR_KETONE_METABOLIC_PROCESS	GOBP_CELLULAR_KETONE_METABOLIC_PROCESS	31	-0.706582	-1.73882	0.000496312	0.332455	0.327514	129	tags=52%, list=18%, signal=44%	PSMB3/FABP3/CES1/PSMA2/GOT2/PSMA4/FABP1/PSMB4/PSMB9/PSMA1/BHMT/APOA5/PSMA3/PSMA5/PSMA7/PSMB8
GOBP_ANTIMICROBIAL_HUMORAL_RESPONSE	GOBP_ANTIMICROBIAL_HUMORAL_RESPONSE	32	-0.688832	-1.69514	0.000534097	0.332455	0.327514	134	tags=41%, list=18%, signal=35%	PRTN3/DEFA3/REG3A/WFDC2/LCN2/CHGA/REG1A/LTF/IGHA2/PLA2G2A/S100A8/ELANE/S100A9
GOBP_EPITHELIUM_DEVELOPMENT	GOBP_EPITHELIUM_DEVELOPMENT	65	-0.600715	-1.63856	0.00056639	0.332455	0.327514	190	tags=54%, list=26%, signal=44%	KRT75/PSMA6/MTHFD1/ACTG1/COL18A1/PSMB5/NRP1/VASP/KRT16/KRT1/CPS1/PSMB3/CES1/KRT85/PSMA2/REG3A/PSMA4/PSMB4/KRT86/CSF1R/FSTL1/KRT31/TNC/SDC1/PSMB9/PSMA1/PSMA3/DAG1/ICAM1/MMP9/PSMA5/KRT9/PSMA7/B4GALT1/PSMB8
GOBP_POSITIVE_REGULATION_OF_SIGNALING	GOBP_POSITIVE_REGULATION_OF_SIGNALING	89	-0.558406	-1.58074	0.00056916	0.332455	0.327514	102	tags=27%, list=14%, signal=26%	PSMA4/PSMB4/CSF1R/SNCA/CHGA/LTF/PSMB9/PSMA1/SPP1/TXN/PSMA3/LGALS1/PLA2G2A/ICAM1/MMP9/DDT/PSMA5/S100A8/ELANE/PSMA7/CSH2/PSMB8/CHI3L1/S100A9
GSE42021_CD24HI_VS_CD24LOW_TREG_THYMUS_UP	GSE42021_CD24HI_VS_CD24LOW_TREG_THYMUS_UP	6	-0.93069	-1.63859	0.000593826	0.332455	0.327514	16	tags=50%, list=2%, signal=49%	ITIH3/S100A8/MRC1
GOMF_THIOREDOXIN_PEROXIDASE_ACTIVITY	GOMF_THIOREDOXIN_PEROXIDASE_ACTIVITY	2	0.994846	1.41751	0.000603876	0.332455	0.327514	2	tags=50%, list=0%, signal=50%	PRDX1
GOBP_MAPK_CASCADE	GOBP_MAPK_CASCADE	56	-0.616566	-1.64341	0.000616663	0.332455	0.327514	169	tags=45%, list=23%, signal=37%	PSMB5/NRP1/YWHAB/IGFBP4/SAA1/NCAM1/PSMB3/PSMA2/PEBP1/PSMA4/PSMB4/CSF1R/SPTB/PSMB9/PSMA1/PSMA3/DAG1/PLA2G2A/ICAM1/DDT/PSMA5/ELANE/PSMA7/PSMB8/CHI3L1
REACTOME_REGULATION_OF_TLR_BY_ENDOGENOUS_LIGAND	REACTOME_REGULATION_OF_TLR_BY_ENDOGENOUS_LIGAND	8	-0.89664	-1.68819	0.000616713	0.332455	0.327514	16	tags=38%, list=2%, signal=37%	LBP/S100A8/S100A9
GOBP_RESPONSE_TO_BIOTIC_STIMULUS	GOBP_RESPONSE_TO_BIOTIC_STIMULUS	188	-0.491542	-1.48264	0.000621155	0.332455	0.327514	137	tags=23%, list=19%, signal=25%	KRT16/PRTN3/KRT1/NCAM1/CPS1/PSMB3/DEFA3/PSMA2/PYGL/REG3A/WFDC2/PSMA4/LCN2/ACTR2/PSMB4/CORO1A/CSF1R/COLEC10/SNCA/ACTR3/CHGA/REG1A/LTF/PSMB9/PSMA1/DHX9/IGHV3-16/PSMA3/IGHA2/PLA2G2A/ICAM1/MPO/VSIG4/PRG2/PTX3/PSMA5/S100A8/ELANE/CA3/PSMA7/PSMB8/MRC1/S100A9
REACTOME_INNATE_IMMUNE_SYSTEM	REACTOME_INNATE_IMMUNE_SYSTEM	184	-0.490858	-1.47974	0.000640415	0.332455	0.327514	134	tags=23%, list=18%, signal=25%	PRTN3/KRT1/PSMB3/DEFA3/PSMA2/FTH1/PYGL/REG3A/GPI/PSMA4/LCN2/ACTR2/PSMB4/COLEC10/CTSD/ACTR3/CHGA/MYO5A/LTF/PSMB9/PSMA1/TXN/DHX9/GDI2/PRKCSH/PSMA3/FTL/CD93/LTA4H/PLA2G2A/MPO/MMP9/PRG2/PTX3/PSMA5/S100A8/ELANE/PSMA7/B4GALT1/PSMB8/SERPINB1/CHI3L1/S100A9
KEGG_COMPLEMENT_AND_COAGULATION_CASCADES	KEGG_COMPLEMENT_AND_COAGULATION_CASCADES	53	0.530918	1.75965	0.000645715	0.332455	0.327514	50	tags=6%, list=7%, signal=6%	CD59/SERPINE1/F7
GOBP_RESPONSE_TO_INTERLEUKIN_1	GOBP_RESPONSE_TO_INTERLEUKIN_1	17	-0.784445	-1.71768	0.000656687	0.332455	0.327514	129	tags=76%, list=18%, signal=65%	PSMB3/PSMA2/PSMA4/PSMB4/SNCA/PSMB9/PSMA1/PSMA3/ICAM1/PSMA5/PSMA7/PSMB8/CHI3L1
GSE4984_UNTREATED_VS_GALECTIN1_TREATED_DC_UP	GSE4984_UNTREATED_VS_GALECTIN1_TREATED_DC_UP	12	-0.825627	-1.70645	0.000675898	0.332455	0.327514	16	tags=50%, list=2%, signal=50%	GSR/VASP/S100A8/ELANE/SERPINB1/S100A9
NOUSHMEHR_GBM_SILENCED_BY_METHYLATION	NOUSHMEHR_GBM_SILENCED_BY_METHYLATION	6	-0.928128	-1.63407	0.000692165	0.332455	0.327514	25	tags=50%, list=3%, signal=49%	MMP9/CA3/CHI3L1
BORCZUK_MALIGNANT_MESOTHELIOMA_DN	BORCZUK_MALIGNANT_MESOTHELIOMA_DN	11	-0.852163	-1.71358	0.000694138	0.332455	0.327514	29	tags=36%, list=4%, signal=35%	PLA2G2A/AMY1A/DDT/B4GALT1
GSE41867_NAIVE_VS_DAY6_LCMV_ARMSTRONG_EFFECTOR_CD8_TCELL_DN	GSE41867_NAIVE_VS_DAY6_LCMV_ARMSTRONG_EFFECTOR_CD8_TCELL_DN	10	-0.861822	-1.70732	0.000737584	0.334575	0.329602	43	tags=60%, list=6%, signal=57%	PRTN3/IL1RL1/MPO/S100A8/B4GALT1/SELENBP1
GOCC_GOLGI_CISTERNA	GOCC_GOLGI_CISTERNA	3	-0.981743	-1.4653	0.000758894	0.334575	0.329602	11	tags=67%, list=1%, signal=66%	B4GALT1/NUCB1
GOBP_ASTROCYTE_DIFFERENTIATION	GOBP_ASTROCYTE_DIFFERENTIATION	4	-0.976514	-1.57128	0.000758962	0.334575	0.329602	16	tags=50%, list=2%, signal=49%	S100A8/S100A9
GOBP_INNATE_IMMUNE_RESPONSE	GOBP_INNATE_IMMUNE_RESPONSE	151	-0.498898	-1.48653	0.000772096	0.334575	0.329602	154	tags=24%, list=21%, signal=24%	VNN1/HSP90AB1/SAA1/KRT16/KRT1/NCAM1/PSMB3/DEFA3/PSMA2/WFDC2/PSMA4/LCN2/ACTR2/PSMB4/CORO1A/CSF1R/COLEC10/SNCA/ACTR3/CHGA/LTF/PSMB9/PSMA1/DHX9/IGHV3-16/PSMA3/IGHA2/ICAM1/VSIG4/PTX3/PSMA5/S100A8/PSMA7/PSMB8/MRC1/S100A9
GSE24574_BCL6_HIGH_TFH_VS_TFH_CD4_TCELL_UP	GSE24574_BCL6_HIGH_TFH_VS_TFH_CD4_TCELL_UP	13	0.8016	1.87638	0.000907801	0.384232	0.378521	48	tags=15%, list=7%, signal=15%	RAB11A/GSTP1
RODWELL_AGING_KIDNEY_UP	RODWELL_AGING_KIDNEY_UP	58	-0.596188	-1.59515	0.000973354	0.390611	0.384805	110	tags=31%, list=15%, signal=29%	SRGN/WFDC2/TYMP/RPS2/TKT/CORO1A/CSF1R/CLIC1/SNCA/TNC/LASP1/LTF/PSMB9/MCAM/TIMP1/SPARCL1/PSMB8/MRC1
WP_VITAMIN_D_RECEPTOR_PATHWAY	WP_VITAMIN_D_RECEPTOR_PATHWAY	17	-0.773139	-1.69292	0.000975458	0.390611	0.384805	55	tags=35%, list=7%, signal=33%	SPP1/IGFBP1/IL1RL1/S100A8/SERPINB1/S100A9
WALLACE_PROSTATE_CANCER_RACE_UP	WALLACE_PROSTATE_CANCER_RACE_UP	34	-0.672308	-1.67397	0.000990981	0.390611	0.384805	110	tags=29%, list=15%, signal=26%	SRGN/TYMP/CORO1A/IGKV1D-13/PSMB9/CD93/VSIG4/MMP9/PSMB8/MRC1
DARWICHE_SKIN_TUMOR_PROMOTER_UP	DARWICHE_SKIN_TUMOR_PROMOTER_UP	23	-0.731818	-1.71008	0.00100872	0.390611	0.384805	55	tags=35%, list=7%, signal=33%	SPP1/MCAM/FTL/ICAM1/S100A8/CA3/CHI3L1/S100A9
GOBP_REGULATION_OF_CELLULAR_CATABOLIC_PROCESS	GOBP_REGULATION_OF_CELLULAR_CATABOLIC_PROCESS	55	-0.609265	-1.62031	0.00104605	0.396628	0.390732	200	tags=49%, list=27%, signal=39%	UBC/GPD1/PSMA6/HNRNPC/PCSK9/PSMB5/YWHAB/HSPA1B/HSP90AB1/NPM1/PSMB3/HNRNPM/PSMA2/PSMA4/FABP1/PSMB4/SNCA/PSMB9/PSMA1/NUP214/DHX9/APOA5/PSMA3/TIMP1/PSMA5/PSMA7/PSMB8
DARWICHE_PAPILLOMA_RISK_HIGH_UP	DARWICHE_PAPILLOMA_RISK_HIGH_UP	16	-0.778003	-1.69793	0.0011045	0.410244	0.404146	54	tags=50%, list=7%, signal=47%	WFDC2/TXN/MCAM/FTL/ICAM1/S100A8/CHI3L1/S100A9
DARWICHE_SQUAMOUS_CELL_CARCINOMA_UP	DARWICHE_SQUAMOUS_CELL_CARCINOMA_UP	21	-0.742853	-1.70315	0.00118913	0.430494	0.424095	55	tags=38%, list=7%, signal=36%	SPP1/TXN/MCAM/FTL/ICAM1/S100A8/CHI3L1/S100A9
GSE21670_STAT3_KO_VS_WT_CD4_TCELL_TGFB_TREATED_DN	GSE21670_STAT3_KO_VS_WT_CD4_TCELL_TGFB_TREATED_DN	6	0.919583	1.74137	0.00120633	0.430494	0.424095	24	tags=50%, list=3%, signal=49%	NT5DC3/PSAT1/FHL1
GOBP_RESPONSE_TO_ABIOTIC_STIMULUS	GOBP_RESPONSE_TO_ABIOTIC_STIMULUS	75	-0.565561	-1.56917	0.00123337	0.431678	0.425262	153	tags=48%, list=21%, signal=42%	SOD2/PSMA6/P4HB/COL18A1/HYOU1/PSMB5/HSPA1B/HSP90AB1/NPM1/PDLIM1/PSMB3/PSMA2/SORD/PSMA4/FABP1/PSMB4/PKLR/IGFBP2/TNC/REG1A/PSMB9/PSMA1/TXN/ACAA2/NUP214/PSMA3/DAG1/ICAM1/MPO/MMP9/TIMP1/PSMA5/ELANE/PSMA7/PSMB8/CHI3L1
GOBP_ASTROCYTE_DEVELOPMENT	GOBP_ASTROCYTE_DEVELOPMENT	3	-0.9776	-1.45912	0.00128059	0.432632	0.426202	16	tags=67%, list=2%, signal=65%	S100A8/S100A9
GSE360_HIGH_DOSE_B_MALAYI_VS_M_TUBERCULOSIS_DC_DN	GSE360_HIGH_DOSE_B_MALAYI_VS_M_TUBERCULOSIS_DC_DN	23	-0.722788	-1.68898	0.00128363	0.432632	0.426202	68	tags=43%, list=9%, signal=41%	TYMP/SPTB/TXN/CD163/PSMA3/ICAM1/MMP9/TIMP1/S100A8/S100A9
GOBP_DEFENSE_RESPONSE_TO_FUNGUS	GOBP_DEFENSE_RESPONSE_TO_FUNGUS	10	-0.849902	-1.6837	0.00131661	0.435678	0.429202	64	tags=70%, list=9%, signal=65%	DEFA3/CHGA/LTF/MPO/S100A8/ELANE/S100A9
GSE1432_1H_VS_6H_IFNG_MICROGLIA_DN	GSE1432_1H_VS_6H_IFNG_MICROGLIA_DN	13	-0.808915	-1.70736	0.00138597	0.450439	0.443744	120	tags=54%, list=16%, signal=46%	PSMA2/TYMP/PSMA4/LAP3/PSMB9/PSMA3/PSMB8
GOBP_POSITIVE_REGULATION_OF_DEFENSE_RESPONSE	GOBP_POSITIVE_REGULATION_OF_DEFENSE_RESPONSE	32	-0.669686	-1.64802	0.00141116	0.450557	0.44386	129	tags=53%, list=18%, signal=46%	PSMB3/PSMA2/PSMA4/PSMB4/SNCA/PSMB9/PSMA1/DHX9/IL1RL1/PSMA3/PLA2G2A/DDT/PSMA5/S100A8/PSMA7/PSMB8/S100A9
GOBP_NEGATIVE_REGULATION_OF_WNT_SIGNALING_PATHWAY	GOBP_NEGATIVE_REGULATION_OF_WNT_SIGNALING_PATHWAY	18	-0.759767	-1.67739	0.0014675	0.450557	0.44386	129	tags=83%, list=18%, signal=70%	PSMB5/IGFBP4/PSMB3/PSMA2/PSMA4/PSMB4/IGFBP2/PSMB9/PSMA1/IGFBP1/PSMA3/PSMA5/TSKU/PSMA7/PSMB8
GOBP_CELLULAR_TRANSITION_METAL_ION_HOMEOSTASIS	GOBP_CELLULAR_TRANSITION_METAL_ION_HOMEOSTASIS	12	-0.806558	-1.66704	0.00149297	0.450557	0.44386	119	tags=58%, list=16%, signal=50%	FTH1/MT1X/LCN2/LTF/FTL/S100A8/S100A9
GOBP_REGULATION_OF_CATABOLIC_PROCESS	GOBP_REGULATION_OF_CATABOLIC_PROCESS	65	-0.582127	-1.58786	0.00154265	0.450557	0.44386	200	tags=45%, list=27%, signal=36%	UBC/GPD1/PSMA6/HNRNPC/PCSK9/PSMB5/YWHAB/HSPA1B/SLC4A1/CDH1/HSP90AB1/NPM1/PSMB3/HNRNPM/PSMA2/PSMA4/FABP1/PSMB4/SNCA/PSMB9/PSMA1/NUP214/DHX9/APOA5/PSMA3/TIMP1/PSMA5/PSMA7/PSMB8
GOBP_MAINTENANCE_OF_LOCATION_IN_CELL	GOBP_MAINTENANCE_OF_LOCATION_IN_CELL	20	-0.748266	-1.70231	0.00154379	0.450557	0.44386	119	tags=45%, list=16%, signal=39%	FTH1/SRGN/LCN2/CORO1A/SNCA/TXN/FTL/S100A8/S100A9
GSE6875_TCONV_VS_FOXP3_KO_TREG_UP	GSE6875_TCONV_VS_FOXP3_KO_TREG_UP	10	-0.846709	-1.67738	0.00156558	0.450557	0.44386	65	tags=40%, list=9%, signal=37%	SDC1/DAG1/CA3/COL6A1
WP_HUMAN_COMPLEMENT_SYSTEM	WP_HUMAN_COMPLEMENT_SYSTEM	55	-0.601292	-1.59911	0.00157408	0.450557	0.44386	55	tags=13%, list=7%, signal=13%	SPP1/TXN/CD93/ICAM1/VSIG4/PTX3/ELANE
ZHENG_IL22_SIGNALING_UP	ZHENG_IL22_SIGNALING_UP	15	-0.795222	-1.70153	0.00158438	0.450557	0.44386	22	tags=33%, list=3%, signal=33%	REG3A/PTX3/TIMP1/S100A8/S100A9
GOBP_RESPONSE_TO_OXYGEN_LEVELS	GOBP_RESPONSE_TO_OXYGEN_LEVELS	37	-0.638434	-1.60446	0.00181456	0.454611	0.447854	189	tags=57%, list=26%, signal=44%	SOD2/PSMA6/P4HB/HYOU1/PSMB5/PDLIM1/PSMB3/PSMA2/PSMA4/FABP1/PSMB4/PKLR/REG1A/PSMB9/PSMA1/ACAA2/PSMA3/ICAM1/PSMA5/PSMA7/PSMB8
HP_HEMOGLOBINURIA	HP_HEMOGLOBINURIA	3	0.980651	1.53298	0.00181905	0.454611	0.447854	1	tags=33%, list=0%, signal=33%	CD59
TARTE_PLASMA_CELL_VS_PLASMABLAST_UP	TARTE_PLASMA_CELL_VS_PLASMABLAST_UP	63	-0.570648	-1.55099	0.00182982	0.454611	0.447854	157	tags=35%, list=21%, signal=30%	PTGDS/IGFBP4/HSPA1B/KRT1/NCAM1/FABP3/CES1/LCN2/RPS2/FSTL1/SNCA/SPTB/TNC/SDC1/REG1A/MCAM/FTL/MPO/MMP9/S100A8/ELANE/S100A9
BARRIER_COLON_CANCER_RECURRENCE_DN	BARRIER_COLON_CANCER_RECURRENCE_DN	1	-1	-1.32332	0.00183541	0.454611	0.447854	2	tags=100%, list=0%, signal=100%
GOBP_RESPONSE_TO_CISPLATIN	GOBP_RESPONSE_TO_CISPLATIN	1	-1	-1.32332	0.00183541	0.454611	0.447854	2	tags=100%, list=0%, signal=100%
GOCC_CIS_GOLGI_NETWORK	GOCC_CIS_GOLGI_NETWORK	1	-1	-1.32332	0.00183541	0.454611	0.447854	2	tags=100%, list=0%, signal=100%
GOMF_GUANYL_NUCLEOTIDE_EXCHANGE_FACTOR_ACTIVITY	GOMF_GUANYL_NUCLEOTIDE_EXCHANGE_FACTOR_ACTIVITY	1	-1	-1.32332	0.00183541	0.454611	0.447854	2	tags=100%, list=0%, signal=100%
GOMF_G_PROTEIN_ALPHA_SUBUNIT_BINDING	GOMF_G_PROTEIN_ALPHA_SUBUNIT_BINDING	1	-1	-1.32332	0.00183541	0.454611	0.447854	2	tags=100%, list=0%, signal=100%
ZHAN_MULTIPLE_MYELOMA_CD1_DN	ZHAN_MULTIPLE_MYELOMA_CD1_DN	1	1	1.31957	0.0018799	0.454611	0.447854	1	tags=100%, list=0%, signal=100%	CD59
BLANCO_MELO_HUMAN_PARAINFLUENZA_VIRUS_3_INFECTION_A594_CELLS_DN	BLANCO_MELO_HUMAN_PARAINFLUENZA_VIRUS_3_INFECTION_A594_CELLS_DN	7	-0.884528	-1.59316	0.00189823	0.454611	0.447854	3	tags=29%, list=0%, signal=29%	SERPINF2/SELENBP1
GOBP_ORGANONITROGEN_COMPOUND_CATABOLIC_PROCESS	GOBP_ORGANONITROGEN_COMPOUND_CATABOLIC_PROCESS	80	-0.555465	-1.55335	0.00193249	0.454611	0.447854	159	tags=35%, list=22%, signal=31%	VCAN/HSPA1B/CDH1/HSP90AB1/LIPC/ENPP2/PSMB3/PSMA2/TYMP/GOT2/PSMA4/PSMB4/HINT1/SNCA/CTSD/SDC1/PSMB9/PSMA1/BHMT/OGN/PSMA3/LTA4H/TIMP1/PSMA5/ELANE/PSMA7/PSMB8/CHI3L1
GSE2128_C57BL6_VS_NOD_THYMOCYTE_DN	GSE2128_C57BL6_VS_NOD_THYMOCYTE_DN	9	-0.875273	-1.6889	0.0019404	0.454611	0.447854	19	tags=44%, list=3%, signal=44%	LBP/SPARCL1/S100A8/SELENBP1
GOCC_ENDOPLASMIC_RETICULUM_LUMEN	GOCC_ENDOPLASMIC_RETICULUM_LUMEN	69	-0.569627	-1.56654	0.00197578	0.454611	0.447854	85	tags=33%, list=12%, signal=33%	P4HB/PCSK9/COL18A1/HYOU1/VCAN/IGFBP4/LIPC/CES1/COL6A3/FSTL1/GOLM1/TNC/SPP1/GANAB/IGFBP1/APOA5/PRKCSH/DAG1/LGALS1/TIMP1/SPARCL1/COL6A1/NUCB1
GSE13306_LAMINA_PROPRIA_VS_SPLEEN_TREG_UP	GSE13306_LAMINA_PROPRIA_VS_SPLEEN_TREG_UP	6	-0.907417	-1.59761	0.00203213	0.454611	0.447854	66	tags=67%, list=9%, signal=61%	LASP1/LTF/ICAM1/S100A8
GSE36078_UNTREATED_VS_AD5_INF_MOUSE_LUNG_DC_DN	GSE36078_UNTREATED_VS_AD5_INF_MOUSE_LUNG_DC_DN	3	-0.972856	-1.45204	0.00204923	0.454611	0.447854	17	tags=67%, list=2%, signal=65%	TSKU/NUCB1
GAL_LEUKEMIC_STEM_CELL_DN	GAL_LEUKEMIC_STEM_CELL_DN	28	-0.685103	-1.64776	0.0020514	0.454611	0.447854	72	tags=39%, list=10%, signal=37%	TYMP/IGFBP2/ACAA2/CD163/CD93/LGALS1/VSIG4/MMP9/S100A8/ELANE/S100A9
PLASARI_TGFB1_TARGETS_10HR_DN	PLASARI_TGFB1_TARGETS_10HR_DN	11	-0.825124	-1.6592	0.00205814	0.454611	0.447854	50	tags=55%, list=7%, signal=52%	SORD/OGN/CD93/PTX3/SERPINB1/MRC1
GSE22140_GERMFREE_VS_SPF_ARTHRITIC_MOUSE_CD4_TCELL_DN	GSE22140_GERMFREE_VS_SPF_ARTHRITIC_MOUSE_CD4_TCELL_DN	18	-0.749405	-1.65451	0.00208001	0.454611	0.447854	105	tags=33%, list=14%, signal=29%	TYMP/PSMA4/PSMB9/S100A8/PSMB8/CHI3L1
HP_HYPOLIPOPROTEINEMIA	HP_HYPOLIPOPROTEINEMIA	8	-0.867921	-1.63412	0.00210801	0.454611	0.447854	42	tags=25%, list=6%, signal=24%	APOA5/PSMB8
GOBP_NEGATIVE_REGULATION_OF_SIGNALING	GOBP_NEGATIVE_REGULATION_OF_SIGNALING	70	-0.566913	-1.56144	0.00213504	0.454611	0.447854	189	tags=43%, list=26%, signal=35%	SOD2/PSMA6/PCSK9/HYOU1/PSMB5/YWHAB/IGFBP4/VNN1/HSPA1B/PSMB3/PSMA2/PEBP1/PSMA4/PSMB4/SNCA/IGFBP2/CHGA/LTF/PSMB9/PSMA1/ACAA2/IGFBP1/PSMA3/DAG1/ICAM1/MMP9/PSMA5/TSKU/PSMA7/PSMB8
GSE19825_NAIVE_VS_IL2RALOW_DAY3_EFF_CD8_TCELL_DN	GSE19825_NAIVE_VS_IL2RALOW_DAY3_EFF_CD8_TCELL_DN	3	0.979611	1.53135	0.00223544	0.454611	0.447854	15	tags=67%, list=2%, signal=66%	PRDX1/ILK
DELYS_THYROID_CANCER_UP	DELYS_THYROID_CANCER_UP	46	-0.614459	-1.588	0.00226351	0.454611	0.447854	101	tags=26%, list=14%, signal=24%	LCN2/CSF1R/CTSD/TNC/SDC1/SPP1/ACAA2/LGALS1/ICAM1/TIMP1/MRC1/CHI3L1
GSE15767_MED_VS_SCS_MAC_LN_UP	GSE15767_MED_VS_SCS_MAC_LN_UP	8	-0.866588	-1.63161	0.0022849	0.454611	0.447854	3	tags=25%, list=0%, signal=25%	FCGR3A/SELENBP1
GOBP_AMINE_METABOLIC_PROCESS	GOBP_AMINE_METABOLIC_PROCESS	17	-0.752225	-1.64713	0.00229371	0.454611	0.447854	129	tags=71%, list=18%, signal=60%	PSMB3/PSMA2/PSMA4/PSMB4/SNCA/PSMB9/PSMA1/BHMT/PSMA3/PSMA5/PSMA7/PSMB8
GOBP_CELLULAR_RESPONSE_TO_OXYGEN_LEVELS	GOBP_CELLULAR_RESPONSE_TO_OXYGEN_LEVELS	21	-0.723652	-1.65913	0.00234047	0.454611	0.447854	200	tags=86%, list=27%, signal=64%	UBC/PSMA6/P4HB/HYOU1/PSMB5/PSMB3/PSMA2/PSMA4/FABP1/PSMB4/PSMB9/PSMA1/ACAA2/PSMA3/ICAM1/PSMA5/PSMA7/PSMB8
KENNEDY_PBMC_DRYVAX_AGE_18_40YO_STIMULATED_VS_UNSTIMULATED_1_TO_48MO_TOP_DEG_DN	KENNEDY_PBMC_DRYVAX_AGE_18_40YO_STIMULATED_VS_UNSTIMULATED_1_TO_48MO_TOP_DEG_DN	5	-0.937821	-1.5864	0.00235399	0.454611	0.447854	16	tags=60%, list=2%, signal=59%	CD14/S100A8/S100A9
GOBP_TRANSITION_METAL_ION_HOMEOSTASIS	GOBP_TRANSITION_METAL_ION_HOMEOSTASIS	13	-0.797056	-1.68233	0.00236272	0.454611	0.447854	119	tags=54%, list=16%, signal=46%	FTH1/MT1X/LCN2/LTF/FTL/S100A8/S100A9
GOBP_RESPONSE_TO_AXON_INJURY	GOBP_RESPONSE_TO_AXON_INJURY	9	-0.869901	-1.67853	0.0023716	0.454611	0.447854	67	tags=44%, list=9%, signal=41%	TNC/SPP1/DAG1/LGALS1
GOBP_REGULATION_OF_CELLULAR_AMINE_METABOLIC_PROCESS	GOBP_REGULATION_OF_CELLULAR_AMINE_METABOLIC_PROCESS	14	-0.776593	-1.65103	0.0023857	0.454611	0.447854	129	tags=79%, list=18%, signal=66%	PSMB3/PSMA2/PSMA4/PSMB4/PSMB9/PSMA1/BHMT/PSMA3/PSMA5/PSMA7/PSMB8
GOBP_REGULATION_OF_CELLULAR_AMINO_ACID_METABOLIC_PROCESS	GOBP_REGULATION_OF_CELLULAR_AMINO_ACID_METABOLIC_PROCESS	14	-0.776593	-1.65103	0.0023857	0.454611	0.447854	129	tags=79%, list=18%, signal=66%	PSMB3/PSMA2/PSMA4/PSMB4/PSMB9/PSMA1/BHMT/PSMA3/PSMA5/PSMA7/PSMB8
GOBP_RESPONSE_TO_OXYGEN_CONTAINING_COMPOUND	GOBP_RESPONSE_TO_OXYGEN_CONTAINING_COMPOUND	111	-0.521302	-1.51016	0.00240306	0.454611	0.447854	130	tags=32%, list=18%, signal=31%	CPS1/FABP3/DEFA3/CES1/YWHAG/REG3A/GOT2/FABP1/ACTR2/MB/PKLR/SNCA/IGFBP2/TNC/SDC1/MYO5A/REG1A/LTF/SPP1/TXN/FBLN5/IGFBP1/DAG1/LGALS1/ICAM1/MPO/MMP9/TIMP1/S100A8/ELANE/CA3/CSH2/MRC1/COL6A1/S100A9
REACTOME_FACTORS_INVOLVED_IN_MEGAKARYOCYTE_DEVELOPMENT_AND_PLATELET_PRODUCTION	REACTOME_FACTORS_INVOLVED_IN_MEGAKARYOCYTE_DEVELOPMENT_AND_PLATELET_PRODUCTION	14	0.745525	1.81334	0.00240547	0.454611	0.447854	47	tags=29%, list=6%, signal=27%	CAPZA1/TUBB8/TUBA8/RAC1
GOMF_CALCIUM_DEPENDENT_PROTEIN_BINDING	GOMF_CALCIUM_DEPENDENT_PROTEIN_BINDING	7	-0.878201	-1.58176	0.00242293	0.454611	0.447854	16	tags=43%, list=2%, signal=42%	MBL2/S100A8/S100A9
GSE26030_TH1_VS_TH17_RESTIMULATED_DAY15_POST_POLARIZATION_UP	GSE26030_TH1_VS_TH17_RESTIMULATED_DAY15_POST_POLARIZATION_UP	9	-0.86738	-1.67367	0.00251533	0.464075	0.457177	39	tags=44%, list=5%, signal=43%	PRKCSH/LTA4H/SPARCL1/S100A9
GOBP_NEGATIVE_REGULATION_OF_CANONICAL_WNT_SIGNALING_PATHWAY	GOBP_NEGATIVE_REGULATION_OF_CANONICAL_WNT_SIGNALING_PATHWAY	17	-0.749411	-1.64096	0.00252436	0.464075	0.457177	129	tags=82%, list=18%, signal=70%	PSMB5/IGFBP4/PSMB3/PSMA2/PSMA4/PSMB4/IGFBP2/PSMB9/PSMA1/IGFBP1/PSMA3/PSMA5/PSMA7/PSMB8
GOMF_CARBOHYDRATE_BINDING	GOMF_CARBOHYDRATE_BINDING	38	-0.635002	-1.60235	0.00255822	0.465595	0.458675	135	tags=42%, list=18%, signal=36%	ENPP2/KRT1/GBE1/PYGL/REG3A/SORD/GPI/COLEC10/REG1A/GANAB/CD93/LGALS1/PRG2/PTX3/MRC1/CHI3L1
KONDO_EZH2_TARGETS	KONDO_EZH2_TARGETS	11	0.798419	1.78829	0.00263307	0.471368	0.464361	24	tags=36%, list=3%, signal=36%	CD59/SPARC/SERPINE1/FHL1
GSE24634_TEFF_VS_TCONV_DAY10_IN_CULTURE_DN	GSE24634_TEFF_VS_TCONV_DAY10_IN_CULTURE_DN	18	-0.74394	-1.64244	0.00264173	0.471368	0.464361	55	tags=28%, list=7%, signal=26%	SPP1/FTL/S100A8/MRC1/S100A9
GSE13484_3H_UNSTIM_VS_YF17D_VACCINE_STIM_PBMC_DN	GSE13484_3H_UNSTIM_VS_YF17D_VACCINE_STIM_PBMC_DN	12	-0.790323	-1.63348	0.00278442	0.480471	0.473329	54	tags=33%, list=7%, signal=31%	TXN/ICAM1/B4GALT1/PSMB8
GOBP_TOLL_LIKE_RECEPTOR_SIGNALING_PATHWAY	GOBP_TOLL_LIKE_RECEPTOR_SIGNALING_PATHWAY	12	-0.788952	-1.63065	0.00289255	0.480471	0.473329	60	tags=42%, list=8%, signal=39%	LBP/UBC/LTF/S100A8/S100A9
GSE22140_GERMFREE_VS_SPF_MOUSE_CD4_TCELL_UP	GSE22140_GERMFREE_VS_SPF_MOUSE_CD4_TCELL_UP	12	-0.789165	-1.63109	0.00289255	0.480471	0.473329	84	tags=50%, list=11%, signal=45%	PSMB3/CLIC1/GDI2/ICAM1/MRC1/NUCB1
GSE11961_UNSTIM_VS_ANTI_IGM_AND_CD40_STIM_6H_FOLLICULAR_BCELL_UP	GSE11961_UNSTIM_VS_ANTI_IGM_AND_CD40_STIM_6H_FOLLICULAR_BCELL_UP	11	-0.814329	-1.6375	0.00291509	0.480471	0.473329	57	tags=36%, list=8%, signal=34%	PSMA1/TXN/LGALS1/PSMA5
LEE_LIVER_CANCER_CIPROFIBRATE_DN	LEE_LIVER_CANCER_CIPROFIBRATE_DN	11	-0.814144	-1.63712	0.00291509	0.480471	0.473329	61	tags=45%, list=8%, signal=42%	REG1A/BHMT/ELANE/CA3/SELENBP1
GSE23321_CENTRAL_MEMORY_VS_NAIVE_CD8_TCELL_UP	GSE23321_CENTRAL_MEMORY_VS_NAIVE_CD8_TCELL_UP	14	-0.772684	-1.64272	0.00294058	0.480471	0.473329	101	tags=50%, list=14%, signal=44%	LCN2/LTF/SPP1/MMP9/S100A8/CHI3L1/S100A9
REACTOME_CROSS_PRESENTATION_OF_SOLUBLE_EXOGENOUS_ANTIGENS_ENDOSOMES	REACTOME_CROSS_PRESENTATION_OF_SOLUBLE_EXOGENOUS_ANTIGENS_ENDOSOMES	13	-0.792738	-1.67322	0.0029448	0.480471	0.473329	129	tags=85%, list=18%, signal=71%	PSMB3/PSMA2/PSMA4/PSMB4/PSMB9/PSMA1/PSMA3/PSMA5/PSMA7/PSMB8/MRC1
NABA_MATRISOME	NABA_MATRISOME	125	-0.503149	-1.47478	0.00294598	0.480471	0.473329	113	tags=21%, list=15%, signal=21%	REG3A/SRGN/COL6A3/COLEC10/FSTL1/CTSD/IGFBP2/TNC/SDC1/REG1A/SPP1/OGN/FBLN5/IGFBP1/LGALS1/MMP9/PRG2/TIMP1/SPARCL1/TSKU/S100A8/ELANE/CSH2/SERPINB1/COL6A1/S100A9
GOBP_MYELOID_LEUKOCYTE_ACTIVATION	GOBP_MYELOID_LEUKOCYTE_ACTIVATION	104	-0.512851	-1.48002	0.0029979	0.480471	0.473329	157	tags=33%, list=21%, signal=30%	PTGDS/VNN1/HSPA1B/HSP90AB1/PRTN3/KRT1/PSMA2/FTH1/PYGL/GPI/LCN2/ACTR2/SNCA/CTSD/CHGA/LTF/GDI2/IL1RL1/FTL/CD93/LTA4H/PLA2G2A/MPO/VSIG4/MMP9/PRG2/PTX3/PSMA5/S100A8/ELANE/B4GALT1/SERPINB1/CHI3L1/S100A9
GSE7831_CPG_VS_INFLUENZA_STIM_PDC_4H_DN	GSE7831_CPG_VS_INFLUENZA_STIM_PDC_4H_DN	12	-0.787799	-1.62827	0.00300068	0.480471	0.473329	27	tags=50%, list=4%, signal=49%	HYOU1/CES1/MPO/PRG2/SERPINB1/COL6A1
GOBP_REGULATION_OF_RESPONSE_TO_EXTERNAL_STIMULUS	GOBP_REGULATION_OF_RESPONSE_TO_EXTERNAL_STIMULUS	89	-0.530531	-1.50183	0.00304484	0.480471	0.473329	102	tags=33%, list=14%, signal=32%	PSMB5/NRP1/SEMA4B/HSP90AB1/SAA1/KRT1/PSMB3/PSMA2/PSMA4/PSMB4/CSF1R/SNCA/LTF/PSMB9/PSMA1/SPP1/DHX9/IL1RL1/PSMA3/PLA2G2A/VSIG4/MMP9/DDT/PSMA5/S100A8/ELANE/PSMA7/PSMB8/S100A9
GSE1460_DP_VS_CD4_THYMOCYTE_UP	GSE1460_DP_VS_CD4_THYMOCYTE_UP	12	-0.786216	-1.62499	0.00310881	0.480471	0.473329	121	tags=58%, list=16%, signal=50%	ASL/FSTL1/CLIC1/TXN/PSMA3/PSMA5/PSMA7
REACTOME_TRANSCRIPTIONAL_REGULATION_BY_RUNX3	REACTOME_TRANSCRIPTIONAL_REGULATION_BY_RUNX3	14	-0.769956	-1.63692	0.00320549	0.480471	0.473329	129	tags=79%, list=18%, signal=66%	PSMB3/PSMA2/PSMA4/PSMB4/PSMB9/PSMA1/SPP1/PSMA3/PSMA5/PSMA7/PSMB8
COATES_MACROPHAGE_M1_VS_M2_UP	COATES_MACROPHAGE_M1_VS_M2_UP	5	0.919355	1.66058	0.00320561	0.480471	0.473329	1	tags=20%, list=0%, signal=20%	CD59
GSE1432_6H_VS_24H_IFNG_MICROGLIA_UP	GSE1432_6H_VS_24H_IFNG_MICROGLIA_UP	19	-0.712161	-1.59304	0.00326782	0.480471	0.473329	84	tags=42%, list=11%, signal=38%	CLIC1/SNCA/GDI2/CD163/LGALS1/MRC1/COL6A1/S100A9
GOMF_TRANSITION_METAL_ION_BINDING	GOMF_TRANSITION_METAL_ION_BINDING	52	-0.585917	-1.54072	0.00328648	0.480471	0.473329	142	tags=37%, list=19%, signal=32%	PAPPA/ENPP2/FTH1/MT1X/SORD/LCN2/LAP3/SNCA/LTF/CSRP1/BHMT/FTL/LTA4H/MMP9/TIMP1/S100A8/CA3/B4GALT1/S100A9
GSE1432_CTRL_VS_IFNG_6H_MICROGLIA_DN	GSE1432_CTRL_VS_IFNG_6H_MICROGLIA_DN	18	-0.739798	-1.6333	0.00330856	0.480471	0.473329	125	tags=56%, list=17%, signal=47%	CES1/PSMA2/TYMP/PSMA4/LAP3/PSMB9/GDI2/PSMA3/ICAM1/PSMB8
GOCC_GOLGI_CISTERNA_MEMBRANE	GOCC_GOLGI_CISTERNA_MEMBRANE	2	-0.989101	-1.37457	0.00336411	0.480471	0.473329	11	tags=100%, list=1%, signal=99%	NUCB1
GOBP_HEMATOPOIETIC_STEM_CELL_DIFFERENTIATION	GOBP_HEMATOPOIETIC_STEM_CELL_DIFFERENTIATION	12	-0.783938	-1.62029	0.00337914	0.480471	0.473329	129	tags=83%, list=18%, signal=70%	PSMB3/PSMA2/PSMA4/PSMB4/PSMB9/PSMA1/PSMA3/PSMA5/PSMA7/PSMB8
GOBP_PROTEASOMAL_UBIQUITIN_INDEPENDENT_PROTEIN_CATABOLIC_PROCESS	GOBP_PROTEASOMAL_UBIQUITIN_INDEPENDENT_PROTEIN_CATABOLIC_PROCESS	12	-0.783938	-1.62029	0.00337914	0.480471	0.473329	129	tags=83%, list=18%, signal=70%	PSMB3/PSMA2/PSMA4/PSMB4/PSMB9/PSMA1/PSMA3/PSMA5/PSMA7/PSMB8
GOBP_REGULATION_OF_HEMATOPOIETIC_PROGENITOR_CELL_DIFFERENTIATION	GOBP_REGULATION_OF_HEMATOPOIETIC_PROGENITOR_CELL_DIFFERENTIATION	12	-0.783938	-1.62029	0.00337914	0.480471	0.473329	129	tags=83%, list=18%, signal=70%	PSMB3/PSMA2/PSMA4/PSMB4/PSMB9/PSMA1/PSMA3/PSMA5/PSMA7/PSMB8
GOBP_REGULATION_OF_HEMATOPOIETIC_STEM_CELL_DIFFERENTIATION	GOBP_REGULATION_OF_HEMATOPOIETIC_STEM_CELL_DIFFERENTIATION	12	-0.783938	-1.62029	0.00337914	0.480471	0.473329	129	tags=83%, list=18%, signal=70%	PSMB3/PSMA2/PSMA4/PSMB4/PSMB9/PSMA1/PSMA3/PSMA5/PSMA7/PSMB8
GOBP_SCF_DEPENDENT_PROTEASOMAL_UBIQUITIN_DEPENDENT_PROTEIN_CATABOLIC_PROCESS	GOBP_SCF_DEPENDENT_PROTEASOMAL_UBIQUITIN_DEPENDENT_PROTEIN_CATABOLIC_PROCESS	12	-0.783938	-1.62029	0.00337914	0.480471	0.473329	129	tags=83%, list=18%, signal=70%	PSMB3/PSMA2/PSMA4/PSMB4/PSMB9/PSMA1/PSMA3/PSMA5/PSMA7/PSMB8
GOCC_PROTEASOME_CORE_COMPLEX	GOCC_PROTEASOME_CORE_COMPLEX	12	-0.783938	-1.62029	0.00337914	0.480471	0.473329	129	tags=83%, list=18%, signal=70%	PSMB3/PSMA2/PSMA4/PSMB4/PSMB9/PSMA1/PSMA3/PSMA5/PSMA7/PSMB8
KEGG_PROTEASOME	KEGG_PROTEASOME	12	-0.783938	-1.62029	0.00337914	0.480471	0.473329	129	tags=83%, list=18%, signal=70%	PSMB3/PSMA2/PSMA4/PSMB4/PSMB9/PSMA1/PSMA3/PSMA5/PSMA7/PSMB8
REACTOME_METABOLISM_OF_POLYAMINES	REACTOME_METABOLISM_OF_POLYAMINES	12	-0.783938	-1.62029	0.00337914	0.480471	0.473329	129	tags=83%, list=18%, signal=70%	PSMB3/PSMA2/PSMA4/PSMB4/PSMB9/PSMA1/PSMA3/PSMA5/PSMA7/PSMB8
GOBP_REGULATION_OF_INFLAMMATORY_RESPONSE	GOBP_REGULATION_OF_INFLAMMATORY_RESPONSE	34	-0.642915	-1.60079	0.00344133	0.482927	0.475749	93	tags=32%, list=13%, signal=30%	PSMB4/SNCA/PSMA1/DHX9/IL1RL1/PLA2G2A/MMP9/DDT/S100A8/ELANE/S100A9
CHIBA_RESPONSE_TO_TSA	CHIBA_RESPONSE_TO_TSA	3	0.975029	1.52419	0.00348893	0.482927	0.475749	2	tags=33%, list=0%, signal=33%	PRDX1
TAKEDA_TARGETS_OF_NUP98_HOXA9_FUSION_3D_DN	TAKEDA_TARGETS_OF_NUP98_HOXA9_FUSION_3D_DN	7	-0.869232	-1.56561	0.00356706	0.482927	0.475749	46	tags=43%, list=6%, signal=41%	CD163/S100A8/S100A9
GSE36078_WT_VS_IL1R_KO_LUNG_DC_AFTER_AD5_T425A_HEXON_INF_UP	GSE36078_WT_VS_IL1R_KO_LUNG_DC_AFTER_AD5_T425A_HEXON_INF_UP	6	-0.895842	-1.57723	0.00359299	0.482927	0.475749	53	tags=67%, list=7%, signal=62%	ACAA2/LGALS1/B4GALT1/NUCB1
GSE37301_MULTIPOTENT_PROGENITOR_VS_GRAN_MONO_PROGENITOR_DN	GSE37301_MULTIPOTENT_PROGENITOR_VS_GRAN_MONO_PROGENITOR_DN	12	-0.782562	-1.61744	0.00364946	0.482927	0.475749	101	tags=42%, list=14%, signal=37%	LCN2/PSMB9/ICAM1/PSMA7/PSMB8
REACTOME_CLASS_I_MHC_MEDIATED_ANTIGEN_PROCESSING_PRESENTATION	REACTOME_CLASS_I_MHC_MEDIATED_ANTIGEN_PROCESSING_PRESENTATION	29	-0.659812	-1.59943	0.00366994	0.482927	0.475749	129	tags=45%, list=18%, signal=38%	PSMB3/PSMA2/PSMA4/PSMB4/PSMB9/PSMA1/PSMA3/PSMA5/S100A8/PSMA7/PSMB8/MRC1/S100A9
REACTOME_DISORDERS_OF_TRANSMEMBRANE_TRANSPORTERS	REACTOME_DISORDERS_OF_TRANSMEMBRANE_TRANSPORTERS	17	-0.740551	-1.62156	0.00368292	0.482927	0.475749	169	tags=88%, list=23%, signal=70%	UBC/PSMA6/PSMB5/SLC4A1/PSMB3/PSMA2/PSMA4/PSMB4/PSMB9/PSMA1/NUP214/PSMA3/PSMA5/PSMA7/PSMB8
GOBP_MACROMOLECULE_CATABOLIC_PROCESS	GOBP_MACROMOLECULE_CATABOLIC_PROCESS	83	-0.524964	-1.47536	0.003691	0.482927	0.475749	169	tags=41%, list=23%, signal=36%	PSMA6/HNRNPC/PCSK9/PSMB5/PYGM/VCAN/YWHAB/HSPA1B/CDH1/HSP90AB1/NPM1/PSMB3/HNRNPM/PSMA2/PYGL/PSMA4/RPS2/LSM1/PSMB4/SNCA/CTSD/SDC1/PSMB9/PSMA1/NUP214/OGN/DHX9/PSMA3/TIMP1/PSMA5/ELANE/PSMA7/PSMB8/CHI3L1
GSE360_CTRL_VS_M_TUBERCULOSIS_DC_DN	GSE360_CTRL_VS_M_TUBERCULOSIS_DC_DN	23	-0.692943	-1.61924	0.0037855	0.482927	0.475749	110	tags=57%, list=15%, signal=50%	GSR/VCAN/CDH1/SRGN/TYMP/KRT86/TXN/CD163/ICAM1/MMP9/PSMA5/S100A8/S100A9
GOCC_INTRINSIC_COMPONENT_OF_EXTERNAL_SIDE_OF_PLASMA_MEMBRANE	GOCC_INTRINSIC_COMPONENT_OF_EXTERNAL_SIDE_OF_PLASMA_MEMBRANE	4	0.945608	1.57784	0.00379767	0.482927	0.475749	1	tags=25%, list=0%, signal=25%	CD59
MEBARKI_HCC_PROGENITOR_WNT_DN_BLOCKED_BY_FZD8CRD	MEBARKI_HCC_PROGENITOR_WNT_DN_BLOCKED_BY_FZD8CRD	2	-0.988052	-1.37311	0.00383945	0.482927	0.475749	7	tags=100%, list=1%, signal=99%	MRC1
MEBARKI_HCC_PROGENITOR_WNT_DN_CTNNB1_DEPENDENT	MEBARKI_HCC_PROGENITOR_WNT_DN_CTNNB1_DEPENDENT	2	-0.988052	-1.37311	0.00383945	0.482927	0.475749	7	tags=100%, list=1%, signal=99%	MRC1
MEBARKI_HCC_PROGENITOR_WNT_DN_CTNNB1_DEPENDENT_BLOCKED_BY_FZD8CRD	MEBARKI_HCC_PROGENITOR_WNT_DN_CTNNB1_DEPENDENT_BLOCKED_BY_FZD8CRD	2	-0.988052	-1.37311	0.00383945	0.482927	0.475749	7	tags=100%, list=1%, signal=99%	MRC1
CHIARADONNA_NEOPLASTIC_TRANSFORMATION_KRAS_UP	CHIARADONNA_NEOPLASTIC_TRANSFORMATION_KRAS_UP	12	-0.781975	-1.61623	0.00386572	0.482927	0.475749	55	tags=50%, list=7%, signal=47%	NCAM1/SPP1/DHX9/IL1RL1/PSMA3/TIMP1
NAKAMURA_TUMOR_ZONE_PERIPHERAL_VS_CENTRAL_DN	NAKAMURA_TUMOR_ZONE_PERIPHERAL_VS_CENTRAL_DN	53	-0.582014	-1.53836	0.00391374	0.482927	0.475749	130	tags=34%, list=18%, signal=30%	CPS1/FTH1/SRGN/WFDC2/LCN2/SDC1/SPP1/IGFBP1/IL1RL1/LTA4H/UGP2/TIMP1/TSKU/S100A8/SERPINB1/CHI3L1/COL6A1/S100A9
SEKI_INFLAMMATORY_RESPONSE_LPS_DN	SEKI_INFLAMMATORY_RESPONSE_LPS_DN	2	-0.987509	-1.37236	0.00397536	0.482927	0.475749	3	tags=100%, list=0%, signal=100%	SELENBP1
REACTOME_ABC_FAMILY_PROTEINS_MEDIATED_TRANSPORT	REACTOME_ABC_FAMILY_PROTEINS_MEDIATED_TRANSPORT	14	-0.762115	-1.62025	0.00400023	0.482927	0.475749	129	tags=93%, list=18%, signal=78%	UBC/PSMA6/PSMB5/PSMB3/PSMA2/PSMA4/PSMB4/PSMB9/PSMA1/PSMA3/PSMA5/PSMA7/PSMB8
REACTOME_ABC_TRANSPORTER_DISORDERS	REACTOME_ABC_TRANSPORTER_DISORDERS	14	-0.762115	-1.62025	0.00400023	0.482927	0.475749	129	tags=93%, list=18%, signal=78%	UBC/PSMA6/PSMB5/PSMB3/PSMA2/PSMA4/PSMB4/PSMB9/PSMA1/PSMA3/PSMA5/PSMA7/PSMB8
GSE6269_HEALTHY_VS_STAPH_PNEUMO_INF_PBMC_DN	GSE6269_HEALTHY_VS_STAPH_PNEUMO_INF_PBMC_DN	28	-0.66726	-1.60484	0.00402661	0.482927	0.475749	101	tags=36%, list=14%, signal=32%	LCN2/SNCA/LTF/CD163/CD93/MPO/S100A8/ELANE/SERPINB1/S100A9
GOCC_MICROTUBULE	GOCC_MICROTUBULE	19	0.672387	1.8269	0.00404571	0.482927	0.475749	108	tags=47%, list=15%, signal=41%	DCXR/RAB11A/TUBB8/CCT2/CCT6A/TUBA8/CLTC/HNRNPU/TUBA1C
YAGI_AML_WITH_T_8_21_TRANSLOCATION	YAGI_AML_WITH_T_8_21_TRANSLOCATION	26	-0.676996	-1.60902	0.00406365	0.482927	0.475749	134	tags=46%, list=18%, signal=39%	PTGDS/PRTN3/PSMB3/SORD/PEBP1/NUP214/FBLN5/LGALS1/UGP2/MPO/DDT/ELANE
WP_MICROGLIA_PATHOGEN_PHAGOCYTOSIS_PATHWAY	WP_MICROGLIA_PATHOGEN_PHAGOCYTOSIS_PATHWAY	5	0.912623	1.64842	0.00410227	0.482927	0.475749	47	tags=40%, list=6%, signal=38%	ARPC1B/RAC1
REACTOME_DOWNSTREAM_SIGNALING_EVENTS_OF_B_CELL_RECEPTOR_BCR	REACTOME_DOWNSTREAM_SIGNALING_EVENTS_OF_B_CELL_RECEPTOR_BCR	14	-0.761516	-1.61898	0.00421216	0.482927	0.475749	129	tags=93%, list=18%, signal=78%	UBC/PSMA6/PSMB5/PSMB3/PSMA2/PSMA4/PSMB4/PSMB9/PSMA1/PSMA3/PSMA5/PSMA7/PSMB8
REACTOME_NEGATIVE_REGULATION_OF_NOTCH4_SIGNALING	REACTOME_NEGATIVE_REGULATION_OF_NOTCH4_SIGNALING	14	-0.760598	-1.61702	0.00431812	0.482927	0.475749	129	tags=93%, list=18%, signal=78%	UBC/PSMA6/PSMB5/PSMB3/PSMA2/PSMA4/PSMB4/PSMB9/PSMA1/PSMA3/PSMA5/PSMA7/PSMB8
REACTOME_SIGNALING_BY_NOTCH4	REACTOME_SIGNALING_BY_NOTCH4	14	-0.760598	-1.61702	0.00431812	0.482927	0.475749	129	tags=93%, list=18%, signal=78%	UBC/PSMA6/PSMB5/PSMB3/PSMA2/PSMA4/PSMB4/PSMB9/PSMA1/PSMA3/PSMA5/PSMA7/PSMB8
BOYLAN_MULTIPLE_MYELOMA_C_D_DN	BOYLAN_MULTIPLE_MYELOMA_C_D_DN	29	-0.6548	-1.58728	0.00434155	0.482927	0.475749	134	tags=34%, list=18%, signal=29%	PRTN3/PYGL/LCN2/LTF/MPO/MMP9/PRG2/S100A8/ELANE/S100A9
MCLACHLAN_DENTAL_CARIES_UP	MCLACHLAN_DENTAL_CARIES_UP	63	-0.546817	-1.48622	0.00436593	0.482927	0.475749	117	tags=25%, list=16%, signal=23%	MT1X/SRGN/TYMP/CORO1A/CSF1R/IGKV1D-13/SPP1/CD163/CD93/ICAM1/MMP9/TIMP1/S100A8/MRC1/CHI3L1/S100A9
GSE40273_EOS_KO_VS_WT_TREG_UP	GSE40273_EOS_KO_VS_WT_TREG_UP	14	-0.760108	-1.61598	0.0043711	0.482927	0.475749	39	tags=29%, list=5%, signal=28%	PRKCSH/FTL/B4GALT1/NUCB1
GSE20715_0H_VS_24H_OZONE_LUNG_UP	GSE20715_0H_VS_24H_OZONE_LUNG_UP	13	-0.782168	-1.6509	0.00443042	0.482927	0.475749	90	tags=38%, list=12%, signal=34%	CORO1A/CSRP1/S100A8/SERPINB1/S100A9
LENAOUR_DENDRITIC_CELL_MATURATION_DN	LENAOUR_DENDRITIC_CELL_MATURATION_DN	29	-0.652554	-1.58184	0.0044375	0.482927	0.475749	90	tags=31%, list=12%, signal=28%	CORO1A/CSF1R/NUP214/CD163/LTA4H/MMP9/S100A8/CHI3L1/S100A9
REACTOME_FCERI_MEDIATED_NF_KB_ACTIVATION	REACTOME_FCERI_MEDIATED_NF_KB_ACTIVATION	20	-0.719365	-1.63657	0.00444322	0.482927	0.475749	129	tags=70%, list=18%, signal=59%	UBC/IGHE/PSMA6/PSMB5/PSMB3/PSMA2/PSMA4/PSMB4/PSMB9/PSMA1/PSMA3/PSMA5/PSMA7/PSMB8
GOBP_PROTEIN_CATABOLIC_PROCESS	GOBP_PROTEIN_CATABOLIC_PROCESS	49	-0.586646	-1.53292	0.00448296	0.482927	0.475749	153	tags=39%, list=21%, signal=33%	PCSK9/PSMB5/HSPA1B/CDH1/HSP90AB1/PSMB3/PSMA2/PSMA4/PSMB4/SNCA/CTSD/PSMB9/PSMA1/PSMA3/TIMP1/PSMA5/ELANE/PSMA7/PSMB8
GSE5589_LPS_AND_IL10_VS_LPS_AND_IL6_STIM_IL10_KO_MACROPHAGE_45MIN_UP	GSE5589_LPS_AND_IL10_VS_LPS_AND_IL6_STIM_IL10_KO_MACROPHAGE_45MIN_UP	13	-0.781895	-1.65033	0.00448348	0.482927	0.475749	53	tags=46%, list=7%, signal=44%	ACAA2/DAG1/PRG2/DDT/S100A8/S100A9
GOBP_POSITIVE_REGULATION_OF_CALCIUM_MEDIATED_SIGNALING	GOBP_POSITIVE_REGULATION_OF_CALCIUM_MEDIATED_SIGNALING	2	0.986376	1.40544	0.00457878	0.482927	0.475749	12	tags=100%, list=2%, signal=99%	CDH13/PTBP1
GOBP_IMMUNE_SYSTEM_DEVELOPMENT	GOBP_IMMUNE_SYSTEM_DEVELOPMENT	48	-0.588099	-1.5358	0.0046523	0.482927	0.475749	154	tags=40%, list=21%, signal=33%	VNN1/HSPA1B/SLC4A1/PRTN3/PSMB3/PSMA2/PSMA4/PSMB4/CSF1R/BPGM/LTF/PSMB9/PSMA1/PSMA3/LGALS1/MMP9/PSMA5/PSMA7/PSMB8
GSE42021_TCONV_PLN_VS_CD24HI_TCONV_THYMUS_UP	GSE42021_TCONV_PLN_VS_CD24HI_TCONV_THYMUS_UP	12	-0.778436	-1.60891	0.00473077	0.482927	0.475749	102	tags=67%, list=14%, signal=58%	SOD2/PSMA6/PSMA4/LAP3/PSMB9/PSMA3/ICAM1/PSMB8
PHONG_TNF_TARGETS_UP	PHONG_TNF_TARGETS_UP	3	-0.962736	-1.43693	0.00484358	0.482927	0.475749	28	tags=67%, list=4%, signal=64%	ICAM1/PTX3
GSE13485_PRE_VS_POST_YF17D_VACCINATION_PBMC_UP	GSE13485_PRE_VS_POST_YF17D_VACCINATION_PBMC_UP	5	-0.925529	-1.5656	0.00498189	0.482927	0.475749	25	tags=60%, list=3%, signal=58%	ORM1/MMP9/CHI3L1
GOCC_EXTERNAL_ENCAPSULATING_STRUCTURE	GOCC_EXTERNAL_ENCAPSULATING_STRUCTURE	119	-0.496447	-1.4467	0.00499219	0.482927	0.475749	74	tags=15%, list=10%, signal=16%	CTSD/TNC/OGN/FBLN5/DAG1/LGALS1/ICAM1/MMP9/PRG2/PTX3/TIMP1/SPARCL1/S100A8/ELANE/SERPINB1/CHI3L1/COL6A1/S100A9
GSE6269_FLU_VS_STAPH_AUREUS_INF_PBMC_DN	GSE6269_FLU_VS_STAPH_AUREUS_INF_PBMC_DN	23	-0.684435	-1.59936	0.00508845	0.482927	0.475749	119	tags=43%, list=16%, signal=38%	FTH1/SRGN/TKT/CTSD/CD93/ICAM1/TIMP1/S100A8/SERPINB1/S100A9
REACTOME_ANTIGEN_PROCESSING_CROSS_PRESENTATION	REACTOME_ANTIGEN_PROCESSING_CROSS_PRESENTATION	27	-0.663685	-1.58168	0.00509097	0.482927	0.475749	129	tags=48%, list=18%, signal=41%	PSMB3/PSMA2/PSMA4/PSMB4/PSMB9/PSMA1/PSMA3/PSMA5/S100A8/PSMA7/PSMB8/MRC1/S100A9
GOBP_REGULATION_OF_DNA_TEMPLATED_TRANSCRIPTION_IN_RESPONSE_TO_STRESS	GOBP_REGULATION_OF_DNA_TEMPLATED_TRANSCRIPTION_IN_RESPONSE_TO_STRESS	14	-0.756882	-1.60912	0.00511286	0.482927	0.475749	129	tags=93%, list=18%, signal=78%	UBC/PSMA6/PSMB5/PSMB3/PSMA2/PSMA4/PSMB4/PSMB9/PSMA1/PSMA3/PSMA5/PSMA7/PSMB8
GOCC_FIBRILLAR_CENTER	GOCC_FIBRILLAR_CENTER	1	-0.998639	-1.32152	0.00514987	0.482927	0.475749	3	tags=100%, list=0%, signal=100%
HP_HALITOSIS	HP_HALITOSIS	1	-0.998639	-1.32152	0.00514987	0.482927	0.475749	3	tags=100%, list=0%, signal=100%
GOCC_ER_TO_GOLGI_TRANSPORT_VESICLE_MEMBRANE	GOCC_ER_TO_GOLGI_TRANSPORT_VESICLE_MEMBRANE	5	0.904224	1.63325	0.00518135	0.482927	0.475749	10	tags=40%, list=1%, signal=40%	CD59/HLA-C
GOBP_REGULATION_OF_INNATE_IMMUNE_RESPONSE	GOBP_REGULATION_OF_INNATE_IMMUNE_RESPONSE	27	-0.662833	-1.57965	0.00518982	0.482927	0.475749	129	tags=52%, list=18%, signal=44%	PSMB5/HSP90AB1/PSMB3/PSMA2/PSMA4/PSMB4/PSMB9/PSMA1/DHX9/PSMA3/VSIG4/PSMA5/PSMA7/PSMB8
GOBP_REGULATION_OF_MRNA_CATABOLIC_PROCESS	GOBP_REGULATION_OF_MRNA_CATABOLIC_PROCESS	25	-0.682618	-1.61564	0.00519891	0.482927	0.475749	200	tags=76%, list=27%, signal=57%	UBC/PSMA6/HNRNPC/PSMB5/YWHAB/NPM1/PSMB3/HNRNPM/PSMA2/PSMA4/PSMB4/PSMB9/PSMA1/NUP214/DHX9/PSMA3/PSMA5/PSMA7/PSMB8
DITTMER_PTHLH_TARGETS_UP	DITTMER_PTHLH_TARGETS_UP	5	-0.924723	-1.56424	0.00523255	0.482927	0.475749	5	tags=60%, list=1%, signal=60%	TPI1/COL6A1/NUCB1
REACTOME_REGULATION_OF_MRNA_STABILITY_BY_PROTEINS_THAT_BIND_AU_RICH_ELEMENTS	REACTOME_REGULATION_OF_MRNA_STABILITY_BY_PROTEINS_THAT_BIND_AU_RICH_ELEMENTS	19	-0.703481	-1.57362	0.00524418	0.482927	0.475749	169	tags=79%, list=23%, signal=62%	UBC/PSMA6/PSMB5/YWHAB/PSMB3/PSMA2/PSMA4/PSMB4/PSMB9/PSMA1/NUP214/PSMA3/PSMA5/PSMA7/PSMB8
HP_ABNORMALITY_OF_KREBS_CYCLE_METABOLISM	HP_ABNORMALITY_OF_KREBS_CYCLE_METABOLISM	1	0.998639	1.31778	0.00527472	0.482927	0.475749	2	tags=100%, list=0%, signal=100%	PRDX1
HP_CYSTATHIONINEMIA	HP_CYSTATHIONINEMIA	1	0.998639	1.31778	0.00527472	0.482927	0.475749	2	tags=100%, list=0%, signal=100%	PRDX1
HP_DECREASED_ADENOSYLCOBALAMIN	HP_DECREASED_ADENOSYLCOBALAMIN	1	0.998639	1.31778	0.00527472	0.482927	0.475749	2	tags=100%, list=0%, signal=100%	PRDX1
HP_DECREASED_METHYLMALONYL_COA_MUTASE_ACTIVITY	HP_DECREASED_METHYLMALONYL_COA_MUTASE_ACTIVITY	1	0.998639	1.31778	0.00527472	0.482927	0.475749	2	tags=100%, list=0%, signal=100%	PRDX1
HP_DELIRIUM	HP_DELIRIUM	1	0.998639	1.31778	0.00527472	0.482927	0.475749	2	tags=100%, list=0%, signal=100%	PRDX1
HP_HOMOCYSTINURIA	HP_HOMOCYSTINURIA	1	0.998639	1.31778	0.00527472	0.482927	0.475749	2	tags=100%, list=0%, signal=100%	PRDX1
HP_HYPOMETHIONINEMIA	HP_HYPOMETHIONINEMIA	1	0.998639	1.31778	0.00527472	0.482927	0.475749	2	tags=100%, list=0%, signal=100%	PRDX1
HP_INCREASED_PROTEINOGENIC_AMINO_ACID_LEVEL_IN_URINE	HP_INCREASED_PROTEINOGENIC_AMINO_ACID_LEVEL_IN_URINE	1	0.998639	1.31778	0.00527472	0.482927	0.475749	2	tags=100%, list=0%, signal=100%	PRDX1
HP_INCREASED_SULFUR_AMINO_ACID_LEVEL_IN_URINE	HP_INCREASED_SULFUR_AMINO_ACID_LEVEL_IN_URINE	1	0.998639	1.31778	0.00527472	0.482927	0.475749	2	tags=100%, list=0%, signal=100%	PRDX1
HP_INCREASED_URINARY_NON_PROTEINOGENIC_AMINO_ACID_LEVEL	HP_INCREASED_URINARY_NON_PROTEINOGENIC_AMINO_ACID_LEVEL	1	0.998639	1.31778	0.00527472	0.482927	0.475749	2	tags=100%, list=0%, signal=100%	PRDX1
HP_METHYLMALONIC_ACIDEMIA	HP_METHYLMALONIC_ACIDEMIA	1	0.998639	1.31778	0.00527472	0.482927	0.475749	2	tags=100%, list=0%, signal=100%	PRDX1
HP_METHYLMALONIC_ACIDURIA	HP_METHYLMALONIC_ACIDURIA	1	0.998639	1.31778	0.00527472	0.482927	0.475749	2	tags=100%, list=0%, signal=100%	PRDX1
HP_PIGMENTARY_RETINOPATHY	HP_PIGMENTARY_RETINOPATHY	1	0.998639	1.31778	0.00527472	0.482927	0.475749	2	tags=100%, list=0%, signal=100%	PRDX1
GOBP_PROTEIN_MODIFICATION_BY_SMALL_PROTEIN_CONJUGATION_OR_REMOVAL	GOBP_PROTEIN_MODIFICATION_BY_SMALL_PROTEIN_CONJUGATION_OR_REMOVAL	27	-0.661494	-1.57645	0.00528867	0.482927	0.475749	169	tags=56%, list=23%, signal=44%	PSMB5/HSPA1B/HSP90AB1/PSMB3/PSMA2/PSMA4/RPS2/PSMB4/PSMB9/PSMA1/NUP214/PSMA3/PSMA5/PSMA7/PSMB8
REACTOME_SIGNALING_BY_NOTCH	REACTOME_SIGNALING_BY_NOTCH	16	-0.733635	-1.6011	0.00533913	0.482927	0.475749	129	tags=69%, list=18%, signal=58%	PSMB3/PSMA2/PSMA4/PSMB4/PSMB9/PSMA1/PSMA3/PSMA5/PSMA7/B4GALT1/PSMB8
WP_IL18_SIGNALING_PATHWAY	WP_IL18_SIGNALING_PATHWAY	16	-0.733489	-1.60078	0.00533913	0.482927	0.475749	83	tags=44%, list=11%, signal=40%	KRT31/BPGM/SPP1/ICAM1/MMP9/PTX3/TIMP1
GSE26928_EFF_MEMORY_VS_CXCR5_POS_CD4_TCELL_UP	GSE26928_EFF_MEMORY_VS_CXCR5_POS_CD4_TCELL_UP	6	0.87848	1.66353	0.00543	0.482927	0.475749	81	tags=50%, list=11%, signal=45%	CD59/PRDX1/ANXA2P2
GSE34205_HEALTHY_VS_RSV_INF_INFANT_PBMC_DN	GSE34205_HEALTHY_VS_RSV_INF_INFANT_PBMC_DN	24	-0.692583	-1.63155	0.00544071	0.482927	0.475749	152	tags=54%, list=21%, signal=44%	SLC4A1/PRTN3/KRT1/LCN2/SNCA/BPGM/LTF/LGALS1/MPO/MMP9/S100A8/S100A9/SELENBP1
GSE24142_ADULT_VS_FETAL_DN3_THYMOCYTE_DN	GSE24142_ADULT_VS_FETAL_DN3_THYMOCYTE_DN	8	0.834373	1.72054	0.00545217	0.482927	0.475749	70	tags=25%, list=10%, signal=23%	CRTAC1/SLC2A3
AZARE_STAT3_TARGETS	AZARE_STAT3_TARGETS	6	-0.885734	-1.55944	0.00549692	0.482927	0.475749	67	tags=67%, list=9%, signal=61%	TNC/DHX9/B4GALT1/S100A9
HP_MICROCYTIC_ANEMIA	HP_MICROCYTIC_ANEMIA	6	-0.886453	-1.5607	0.00549692	0.482927	0.475749	9	tags=33%, list=1%, signal=33%	CAT/PSMB8
BLANCO_MELO_COVID19_SARS_COV_2_INFECTION_A594_CELLS_UP	BLANCO_MELO_COVID19_SARS_COV_2_INFECTION_A594_CELLS_UP	3	-0.9605	-1.4336	0.00556845	0.482927	0.475749	28	tags=67%, list=4%, signal=64%	ICAM1/PTX3
GOBP_CALCIUM_DEPENDENT_CELL_CELL_ADHESION_VIA_PLASMA_MEMBRANE_CELL_ADHESION_MOLECULES	GOBP_CALCIUM_DEPENDENT_CELL_CELL_ADHESION_VIA_PLASMA_MEMBRANE_CELL_ADHESION_MOLECULES	3	0.970949	1.51781	0.00558469	0.482927	0.475749	4	tags=33%, list=1%, signal=33%	CDH13
HP_DECREASED_HDL_CHOLESTEROL_CONCENTRATION	HP_DECREASED_HDL_CHOLESTEROL_CONCENTRATION	5	-0.923477	-1.56213	0.00573387	0.482927	0.475749	42	tags=40%, list=6%, signal=38%	APOA5/PSMB8
GOCC_ANCHORED_COMPONENT_OF_EXTERNAL_SIDE_OF_PLASMA_MEMBRANE	GOCC_ANCHORED_COMPONENT_OF_EXTERNAL_SIDE_OF_PLASMA_MEMBRANE	3	0.970064	1.51643	0.00583662	0.482927	0.475749	1	tags=33%, list=0%, signal=33%	CD59
GOCC_ANCHORED_COMPONENT_OF_PLASMA_MEMBRANE	GOCC_ANCHORED_COMPONENT_OF_PLASMA_MEMBRANE	3	0.970064	1.51643	0.00583662	0.482927	0.475749	1	tags=33%, list=0%, signal=33%	CD59
GSE24142_ADULT_VS_FETAL_EARLY_THYMIC_PROGENITOR_DN	GSE24142_ADULT_VS_FETAL_EARLY_THYMIC_PROGENITOR_DN	12	0.769103	1.75398	0.00584186	0.482927	0.475749	119	tags=58%, list=16%, signal=50%	TUBA8/VDAC3/PGM1/ADAMDEC1/PHB/EIF5A/GOT1
GOBP_NEURON_PROJECTION_REGENERATION	GOBP_NEURON_PROJECTION_REGENERATION	7	-0.858022	-1.54542	0.00586234	0.482927	0.475749	67	tags=43%, list=9%, signal=39%	TNC/SPP1/DAG1
GOBP_CYTOKINE_PRODUCTION	GOBP_CYTOKINE_PRODUCTION	57	-0.567548	-1.51713	0.00589288	0.482927	0.475749	64	tags=21%, list=9%, signal=21%	CHGA/LTF/DHX9/IL1RL1/VSIG4/DDT/TSKU/S100A8/ELANE/SERPINB1/CHI3L1/S100A9
GOBP_ENDODERMAL_CELL_DIFFERENTIATION	GOBP_ENDODERMAL_CELL_DIFFERENTIATION	4	-0.95018	-1.52891	0.00591185	0.482927	0.475749	25	tags=50%, list=3%, signal=49%	MMP9/COL6A1
GOBP_ENDODERM_DEVELOPMENT	GOBP_ENDODERM_DEVELOPMENT	4	-0.95018	-1.52891	0.00591185	0.482927	0.475749	25	tags=50%, list=3%, signal=49%	MMP9/COL6A1
GOBP_ENDODERM_FORMATION	GOBP_ENDODERM_FORMATION	4	-0.95018	-1.52891	0.00591185	0.482927	0.475749	25	tags=50%, list=3%, signal=49%	MMP9/COL6A1
GOBP_PROTEIN_MODIFICATION_BY_SMALL_PROTEIN_REMOVAL	GOBP_PROTEIN_MODIFICATION_BY_SMALL_PROTEIN_REMOVAL	16	-0.730166	-1.59353	0.00596115	0.482927	0.475749	129	tags=62%, list=18%, signal=53%	PSMB3/PSMA2/PSMA4/PSMB4/PSMB9/PSMA1/PSMA3/PSMA5/PSMA7/PSMB8
GOBP_REGULATION_OF_RESPONSE_TO_BIOTIC_STIMULUS	GOBP_REGULATION_OF_RESPONSE_TO_BIOTIC_STIMULUS	33	-0.638877	-1.58136	0.00599837	0.482927	0.475749	129	tags=42%, list=18%, signal=37%	HSP90AB1/PSMB3/PSMA2/PSMA4/PSMB4/LTF/PSMB9/PSMA1/DHX9/PSMA3/VSIG4/PSMA5/PSMA7/PSMB8
GSE25123_IL4_VS_IL4_AND_ROSIGLITAZONE_STIM_MACROPHAGE_DAY10_UP	GSE25123_IL4_VS_IL4_AND_ROSIGLITAZONE_STIM_MACROPHAGE_DAY10_UP	12	-0.768476	-1.58833	0.006031	0.482927	0.475749	55	tags=50%, list=7%, signal=47%	SRGN/SPP1/IL1RL1/LGALS1/SERPINB1/NUCB1
KYNG_ENVIRONMENTAL_STRESS_RESPONSE_NOT_BY_UV_IN_WS	KYNG_ENVIRONMENTAL_STRESS_RESPONSE_NOT_BY_UV_IN_WS	2	0.985052	1.40355	0.00603747	0.482927	0.475749	3	tags=50%, list=0%, signal=50%	ARPC1B
GOBP_PROTEIN_MODIFICATION_BY_SMALL_PROTEIN_CONJUGATION	GOBP_PROTEIN_MODIFICATION_BY_SMALL_PROTEIN_CONJUGATION	25	-0.676683	-1.60159	0.00607347	0.482927	0.475749	169	tags=60%, list=23%, signal=48%	PSMB5/HSPA1B/HSP90AB1/PSMB3/PSMA2/PSMA4/RPS2/PSMB4/PSMB9/PSMA1/NUP214/PSMA3/PSMA5/PSMA7/PSMB8
GSE34179_THPOK_KO_VS_WT_VA14I_NKTCELL_UP	GSE34179_THPOK_KO_VS_WT_VA14I_NKTCELL_UP	2	-0.983651	-1.367	0.00608192	0.482927	0.475749	15	tags=100%, list=2%, signal=98%	CHI3L1
GOMF_ENDOPEPTIDASE_ACTIVITY	GOMF_ENDOPEPTIDASE_ACTIVITY	55	-0.567459	-1.50913	0.00618079	0.482927	0.475749	142	tags=40%, list=19%, signal=35%	PDIA3/PSMA6/PCSK9/ADAM12/PSMB5/PAPPA/PRTN3/CPS1/PSMB3/PSMA2/PSMA4/PSMB4/CTSD/LTF/PSMB9/PSMA1/PSMA3/MMP9/PSMA5/ELANE/PSMA7/PSMB8
LI_PBMC_MENACTRA_AGE_18_45YO_ANTI_POLYSACCHARIDE_ANTIBODY_CORRELATION_PROFILE_3DY_UP	LI_PBMC_MENACTRA_AGE_18_45YO_ANTI_POLYSACCHARIDE_ANTIBODY_CORRELATION_PROFILE_3DY_UP	9	-0.843872	-1.62831	0.00621274	0.482927	0.475749	22	tags=22%, list=3%, signal=22%	SERPING1/PTX3
GSE29618_MONOCYTE_VS_MDC_DAY7_FLU_VACCINE_UP	GSE29618_MONOCYTE_VS_MDC_DAY7_FLU_VACCINE_UP	22	-0.700024	-1.62148	0.00622755	0.482927	0.475749	118	tags=45%, list=16%, signal=39%	PYGL/TKT/CTSD/CD163/FTL/LTA4H/ICAM1/PTX3/S100A8/S100A9
GSE4142_GC_BCELL_VS_MEMORY_BCELL_UP	GSE4142_GC_BCELL_VS_MEMORY_BCELL_UP	8	-0.837164	-1.57621	0.00625269	0.482927	0.475749	78	tags=38%, list=11%, signal=34%	MB/IGFBP2/LASP1
REACTOME_HEDGEHOG_OFF_STATE	REACTOME_HEDGEHOG_OFF_STATE	19	-0.701218	-1.56856	0.00626244	0.482927	0.475749	129	tags=53%, list=18%, signal=45%	PSMB3/PSMA2/PSMA4/PSMB4/PSMB9/PSMA1/PSMA3/PSMA5/PSMA7/PSMB8
LI_PBMC_MENOMUNE_A_C_Y_W_135_AGE_18_45YO_3DY_UP	LI_PBMC_MENOMUNE_A_C_Y_W_135_AGE_18_45YO_3DY_UP	9	-0.842953	-1.62654	0.00632886	0.482927	0.475749	22	tags=33%, list=3%, signal=33%	A2M/SERPING1/PTX3
GOMF_LIPID_BINDING	GOMF_LIPID_BINDING	56	-0.56691	-1.51106	0.00633594	0.482927	0.475749	130	tags=23%, list=18%, signal=21%	CPS1/FABP3/PEBP1/GOT2/FABP1/PSMB4/SNCA/LTF/PSMA1/APOA5/PLA2G2A/S100A8/S100A9
GSE25088_WT_VS_STAT6_KO_MACROPHAGE_IL4_STIM_UP	GSE25088_WT_VS_STAT6_KO_MACROPHAGE_IL4_STIM_UP	2	-0.98303	-1.36613	0.00635373	0.482927	0.475749	11	tags=100%, list=1%, signal=99%	B4GALT1
GSE11961_MARGINAL_ZONE_BCELL_VS_PLASMA_CELL_DAY7_DN	GSE11961_MARGINAL_ZONE_BCELL_VS_PLASMA_CELL_DAY7_DN	5	-0.920432	-1.55698	0.00648646	0.482927	0.475749	38	tags=60%, list=5%, signal=57%	PTGR1/LGALS1/NUCB1
WOOD_EBV_EBNA1_TARGETS_DN	WOOD_EBV_EBNA1_TARGETS_DN	8	-0.833633	-1.56956	0.00649088	0.482927	0.475749	95	tags=62%, list=13%, signal=55%	ACTR2/ACAA2/UGP2/S100A8/PSMB8
REACTOME_CYTOPROTECTION_BY_HMOX1	REACTOME_CYTOPROTECTION_BY_HMOX1	18	-0.71974	-1.58902	0.00654669	0.482927	0.475749	129	tags=61%, list=18%, signal=52%	PSMB3/PSMA2/PSMA4/FABP1/PSMB4/PSMB9/PSMA1/PSMA3/PSMA5/PSMA7/PSMB8
HP_NEPHRITIS	HP_NEPHRITIS	14	-0.74842	-1.59113	0.00654913	0.482927	0.475749	55	tags=29%, list=7%, signal=27%	FCGR2A/SPP1/FBLN5/GANAB
LIU_VAV3_PROSTATE_CARCINOGENESIS_UP	LIU_VAV3_PROSTATE_CARCINOGENESIS_UP	25	-0.675403	-1.59856	0.00655934	0.482927	0.475749	127	tags=32%, list=17%, signal=27%	FABP3/WFDC2/TNC/LTF/PSMB9/SPP1/PSMB8/SERPINB1
GSE26488_HDAC7_KO_VS_VP16_TRANSGENIC_HDAC7_KO_DOUBLE_POSITIVE_THYMOCYTE_DN	GSE26488_HDAC7_KO_VS_VP16_TRANSGENIC_HDAC7_KO_DOUBLE_POSITIVE_THYMOCYTE_DN	10	-0.810225	-1.6051	0.00666011	0.482927	0.475749	2	tags=20%, list=0%, signal=20%	CRP/NUCB1
GSE18281_SUBCAPSULAR_VS_CENTRAL_CORTICAL_REGION_OF_THYMUS_DN	GSE18281_SUBCAPSULAR_VS_CENTRAL_CORTICAL_REGION_OF_THYMUS_DN	19	-0.69877	-1.56308	0.00666974	0.482927	0.475749	119	tags=42%, list=16%, signal=36%	FTH1/LCN2/PSMB9/TIMP1/S100A8/PSMB8/CHI3L1/S100A9
LOPEZ_MESOTHELIOMA_SURVIVAL_WORST_VS_BEST_DN	LOPEZ_MESOTHELIOMA_SURVIVAL_WORST_VS_BEST_DN	3	-0.956438	-1.42753	0.00668872	0.482927	0.475749	6	tags=67%, list=1%, signal=66%	HP/CHI3L1
GOBP_MAINTENANCE_OF_LOCATION	GOBP_MAINTENANCE_OF_LOCATION	31	-0.64211	-1.58016	0.00669458	0.482927	0.475749	167	tags=39%, list=23%, signal=31%	CRP/YWHAB/CES1/FTH1/SRGN/LCN2/CORO1A/SNCA/TXN/FTL/S100A8/S100A9
GOBP_CELL_CELL_SIGNALING	GOBP_CELL_CELL_SIGNALING	62	-0.542116	-1.47051	0.00670012	0.482927	0.475749	129	tags=37%, list=18%, signal=33%	PSMB3/PSMA2/YWHAG/SRGN/PSMA4/PSMB4/SNCA/IGFBP2/TNC/SDC1/CHGA/PSMB9/PSMA1/SPP1/IGFBP1/PSMA3/DAG1/PSMA5/TSKU/S100A8/PSMA7/PSMB8/S100A9
REACTOME_TRANSCRIPTIONAL_REGULATION_BY_RUNX1	REACTOME_TRANSCRIPTIONAL_REGULATION_BY_RUNX1	18	-0.719477	-1.58844	0.00675288	0.482927	0.475749	129	tags=56%, list=18%, signal=47%	PSMB3/PSMA2/PSMA4/PSMB4/PSMB9/PSMA1/PSMA3/PSMA5/PSMA7/PSMB8
GSE22886_CTRL_VS_LPS_24H_DC_DN	GSE22886_CTRL_VS_LPS_24H_DC_DN	13	-0.771577	-1.62855	0.00677179	0.482927	0.475749	105	tags=46%, list=14%, signal=40%	TYMP/LAP3/PSMB9/TXN/ICAM1/PSMB8
GOBP_MODIFICATION_DEPENDENT_MACROMOLECULE_CATABOLIC_PROCESS	GOBP_MODIFICATION_DEPENDENT_MACROMOLECULE_CATABOLIC_PROCESS	26	-0.664617	-1.5796	0.00679806	0.482927	0.475749	169	tags=65%, list=23%, signal=52%	UCHL1/XPO1/UBC/PSMA6/PSMB5/HSPA1B/HSP90AB1/PSMB3/PSMA2/PSMA4/PSMB4/PSMB9/PSMA1/PSMA3/PSMA5/PSMA7/PSMB8
GOBP_REGULATION_OF_NEURONAL_SYNAPTIC_PLASTICITY	GOBP_REGULATION_OF_NEURONAL_SYNAPTIC_PLASTICITY	3	0.967954	1.51313	0.00692835	0.482927	0.475749	20	tags=33%, list=3%, signal=33%	RAB11A
GOBP_POSITIVE_REGULATION_OF_ERK1_AND_ERK2_CASCADE	GOBP_POSITIVE_REGULATION_OF_ERK1_AND_ERK2_CASCADE	14	-0.747296	-1.58874	0.00697508	0.482927	0.475749	89	tags=36%, list=12%, signal=32%	CSF1R/PLA2G2A/ICAM1/DDT/CHI3L1
GOBP_AUTOCRINE_SIGNALING	GOBP_AUTOCRINE_SIGNALING	2	-0.982289	-1.3651	0.00703394	0.482927	0.475749	16	tags=100%, list=2%, signal=98%	S100A9
GOBP_SEQUESTERING_OF_ZINC_ION	GOBP_SEQUESTERING_OF_ZINC_ION	2	-0.982289	-1.3651	0.00703394	0.482927	0.475749	16	tags=100%, list=2%, signal=98%	S100A9
GOMF_ICOSANOID_BINDING	GOMF_ICOSANOID_BINDING	2	-0.982289	-1.3651	0.00703394	0.482927	0.475749	16	tags=100%, list=2%, signal=98%	S100A9
GOMF_RAGE_RECEPTOR_BINDING	GOMF_RAGE_RECEPTOR_BINDING	2	-0.982289	-1.3651	0.00703394	0.482927	0.475749	16	tags=100%, list=2%, signal=98%	S100A9
GOMF_TOLL_LIKE_RECEPTOR_BINDING	GOMF_TOLL_LIKE_RECEPTOR_BINDING	2	-0.982289	-1.3651	0.00703394	0.482927	0.475749	16	tags=100%, list=2%, signal=98%	S100A9
GSE9037_WT_VS_IRAK4_KO_LPS_1H_STIM_BMDM_UP	GSE9037_WT_VS_IRAK4_KO_LPS_1H_STIM_BMDM_UP	4	-0.946092	-1.52233	0.00710417	0.482927	0.475749	7	tags=50%, list=1%, signal=50%	TGFBI/MRC1
REACTOME_SIGNALING_BY_THE_B_CELL_RECEPTOR_BCR	REACTOME_SIGNALING_BY_THE_B_CELL_RECEPTOR_BCR	22	-0.695624	-1.61129	0.00711018	0.482927	0.475749	129	tags=45%, list=18%, signal=39%	PSMB3/PSMA2/PSMA4/PSMB4/PSMB9/PSMA1/PSMA3/PSMA5/PSMA7/PSMB8
GOBP_REGULATION_OF_WNT_SIGNALING_PATHWAY	GOBP_REGULATION_OF_WNT_SIGNALING_PATHWAY	19	-0.69625	-1.55745	0.00717888	0.482927	0.475749	129	tags=79%, list=18%, signal=67%	PSMB5/IGFBP4/PSMB3/PSMA2/PSMA4/PSMB4/IGFBP2/PSMB9/PSMA1/IGFBP1/PSMA3/PSMA5/TSKU/PSMA7/PSMB8
DAZARD_UV_RESPONSE_CLUSTER_G3	DAZARD_UV_RESPONSE_CLUSTER_G3	1	-0.997279	-1.31972	0.00719518	0.482927	0.475749	4	tags=100%, list=1%, signal=100%
GOBP_INTEGRIN_BIOSYNTHETIC_PROCESS	GOBP_INTEGRIN_BIOSYNTHETIC_PROCESS	1	-0.997279	-1.31972	0.00719518	0.482927	0.475749	4	tags=100%, list=1%, signal=100%
GOBP_REGULATION_OF_INTEGRIN_BIOSYNTHETIC_PROCESS	GOBP_REGULATION_OF_INTEGRIN_BIOSYNTHETIC_PROCESS	1	-0.997279	-1.31972	0.00719518	0.482927	0.475749	4	tags=100%, list=1%, signal=100%
SHIN_B_CELL_LYMPHOMA_CLUSTER_9	SHIN_B_CELL_LYMPHOMA_CLUSTER_9	1	-0.997279	-1.31972	0.00719518	0.482927	0.475749	4	tags=100%, list=1%, signal=100%
WIEMANN_TELOMERE_SHORTENING_AND_CHRONIC_LIVER_DAMAGE_DN	WIEMANN_TELOMERE_SHORTENING_AND_CHRONIC_LIVER_DAMAGE_DN	1	-0.997279	-1.31972	0.00719518	0.482927	0.475749	4	tags=100%, list=1%, signal=100%
GSE40274_CTRL_VS_IRF4_TRANSDUCED_ACTIVATED_CD4_TCELL_UP	GSE40274_CTRL_VS_IRF4_TRANSDUCED_ACTIVATED_CD4_TCELL_UP	11	-0.795383	-1.5994	0.00719812	0.482927	0.475749	84	tags=27%, list=11%, signal=25%	CLIC1/CTSD/PSMB8
GOBP_CELLULAR_RESPONSE_TO_OXYGEN_CONTAINING_COMPOUND	GOBP_CELLULAR_RESPONSE_TO_OXYGEN_CONTAINING_COMPOUND	67	-0.551331	-1.51099	0.00723803	0.482927	0.475749	130	tags=36%, list=18%, signal=32%	CPS1/DEFA3/CES1/YWHAG/FABP1/ACTR2/PKLR/SNCA/TNC/MYO5A/REG1A/LTF/SPP1/TXN/FBLN5/IGFBP1/DAG1/LGALS1/ICAM1/MPO/MMP9/CSH2/MRC1/COL6A1
GOBP_CELL_ACTIVATION_INVOLVED_IN_IMMUNE_RESPONSE	GOBP_CELL_ACTIVATION_INVOLVED_IN_IMMUNE_RESPONSE	104	-0.491212	-1.41757	0.00725505	0.482927	0.475749	157	tags=32%, list=21%, signal=29%	PTGDS/VNN1/HSPA1B/HSP90AB1/PRTN3/KRT1/PSMA2/FTH1/PYGL/GPI/LCN2/ACTR2/CORO1A/CTSD/CHGA/LTF/GDI2/FTL/CD93/LGALS1/LTA4H/ICAM1/MPO/MMP9/PRG2/PTX3/PSMA5/S100A8/ELANE/B4GALT1/SERPINB1/CHI3L1/S100A9
GOBP_METAL_ION_HOMEOSTASIS	GOBP_METAL_ION_HOMEOSTASIS	31	-0.640061	-1.57511	0.00725636	0.482927	0.475749	119	tags=35%, list=16%, signal=31%	FTH1/MT1X/LCN2/CORO1A/SNCA/REG1A/LTF/FTL/S100A8/ELANE/S100A9
GOBP_MORPHOGENESIS_OF_AN_EPITHELIUM	GOBP_MORPHOGENESIS_OF_AN_EPITHELIUM	32	-0.625688	-1.53975	0.00730228	0.482927	0.475749	188	tags=62%, list=26%, signal=49%	PSMA6/MTHFD1/ACTG1/PSMB5/NRP1/VASP/KRT16/PSMB3/PSMA2/PSMA4/PSMB4/CSF1R/TNC/PSMB9/PSMA1/PSMA3/DAG1/PSMA5/PSMA7/PSMB8
MCCLUNG_CREB1_TARGETS_DN	MCCLUNG_CREB1_TARGETS_DN	4	-0.944442	-1.51968	0.00735564	0.482927	0.475749	5	tags=50%, list=1%, signal=50%	MAN1A1/COL6A1
HP_LYMPHOCYTOSIS	HP_LYMPHOCYTOSIS	1	0.997279	1.31598	0.00736961	0.482927	0.475749	3	tags=100%, list=0%, signal=100%	ARPC1B
GOBP_LEUKOCYTE_MIGRATION_INVOLVED_IN_INFLAMMATORY_RESPONSE	GOBP_LEUKOCYTE_MIGRATION_INVOLVED_IN_INFLAMMATORY_RESPONSE	4	-0.94314	-1.51758	0.00748137	0.482927	0.475749	16	tags=100%, list=2%, signal=98%	S100A8/ELANE/S100A9
GOBP_INNATE_IMMUNE_RESPONSE_ACTIVATING_SIGNAL_TRANSDUCTION	GOBP_INNATE_IMMUNE_RESPONSE_ACTIVATING_SIGNAL_TRANSDUCTION	14	-0.745365	-1.58464	0.00750752	0.482927	0.475749	129	tags=71%, list=18%, signal=60%	PSMB3/PSMA2/PSMA4/PSMB4/PSMB9/PSMA1/PSMA3/PSMA5/PSMA7/PSMB8
GOBP_PEPTIDYL_AMINO_ACID_MODIFICATION	GOBP_PEPTIDYL_AMINO_ACID_MODIFICATION	35	-0.616657	-1.53908	0.00750974	0.482927	0.475749	89	tags=26%, list=12%, signal=24%	CSF1R/SNCA/TXN/NUP214/ICAM1/S100A8/CSH2/CHI3L1/S100A9
GSE27859_MACROPHAGE_VS_DC_DN	GSE27859_MACROPHAGE_VS_DC_DN	10	-0.805331	-1.59541	0.00755557	0.482927	0.475749	119	tags=50%, list=16%, signal=42%	FTH1/PKLR/CTSD/DAG1/LTA4H
GOBP_PROTEASOMAL_PROTEIN_CATABOLIC_PROCESS	GOBP_PROTEASOMAL_PROTEIN_CATABOLIC_PROCESS	24	-0.6812	-1.60474	0.00755917	0.482927	0.475749	223	tags=71%, list=30%, signal=51%	UCHL1/XPO1/UBC/PSMA6/PSMB5/HSPA1B/HSP90AB1/PSMB3/PSMA2/PSMA4/PSMB4/PSMB9/PSMA1/PSMA3/PSMA5/PSMA7/PSMB8
GOBP_STEM_CELL_DIFFERENTIATION	GOBP_STEM_CELL_DIFFERENTIATION	18	-0.716586	-1.58205	0.00757765	0.482927	0.475749	169	tags=78%, list=23%, signal=61%	PSMA6/PSMB5/NRP1/SEMA4B/PSMB3/PSMA2/PSMA4/PSMB4/PSMB9/PSMA1/PSMA3/PSMA5/PSMA7/PSMB8
GSE17721_0.5H_VS_24H_CPG_BMDC_UP	GSE17721_0.5H_VS_24H_CPG_BMDC_UP	15	-0.747472	-1.59936	0.00758347	0.482927	0.475749	118	tags=53%, list=16%, signal=46%	PYGL/LAP3/SPP1/ACAA2/CD93/LGALS1/MRC1/S100A9
REACTOME_INTERLEUKIN_1_FAMILY_SIGNALING	REACTOME_INTERLEUKIN_1_FAMILY_SIGNALING	15	-0.748928	-1.60248	0.00758347	0.482927	0.475749	147	tags=100%, list=20%, signal=82%	PSMA6/PSMB5/SAA1/PSMB3/PSMA2/PSMA4/PSMB4/PSMB9/PSMA1/IL1RL1/PSMA3/PSMA5/PSMA7/PSMB8
LOPEZ_TRANSLATION_VIA_FN1_SIGNALING	LOPEZ_TRANSLATION_VIA_FN1_SIGNALING	4	0.934835	1.55987	0.00763286	0.482927	0.475749	27	tags=75%, list=4%, signal=73%	PTBP1/CALD1/ARHGDIA
GOBP_ENDOTHELIAL_CELL_PROLIFERATION	GOBP_ENDOTHELIAL_CELL_PROLIFERATION	14	0.700919	1.70484	0.0076393	0.482927	0.475749	68	tags=29%, list=9%, signal=26%	CDH13/SPARC/THBS4/IGF2
GSE27291_6H_VS_7D_STIM_GAMMADELTA_TCELL_UP	GSE27291_6H_VS_7D_STIM_GAMMADELTA_TCELL_UP	13	-0.768066	-1.62114	0.00773156	0.482927	0.475749	32	tags=54%, list=4%, signal=52%	ARHGDIB/TCP1/BIN2/LGALS1/DDT/PSMB8/SERPINB1
RUAN_RESPONSE_TO_TROGLITAZONE_DN	RUAN_RESPONSE_TO_TROGLITAZONE_DN	3	-0.954291	-1.42433	0.00774829	0.482927	0.475749	3	tags=67%, list=0%, signal=67%	ORM1/SELENBP1
CORRE_MULTIPLE_MYELOMA_DN	CORRE_MULTIPLE_MYELOMA_DN	3	-0.954121	-1.42407	0.00788074	0.482927	0.475749	3	tags=67%, list=0%, signal=67%	FBLN1/SELENBP1
GOCC_INTRACELLULAR_PROTEIN_CONTAINING_COMPLEX	GOCC_INTRACELLULAR_PROTEIN_CONTAINING_COMPLEX	19	-0.693901	-1.55219	0.00789166	0.482927	0.475749	150	tags=74%, list=20%, signal=60%	PSMB5/HSP90AB1/PSMB3/PSMA2/FTH1/PSMA4/PSMB4/PSMB9/PSMA1/PSMA3/FTL/PSMA5/PSMA7/PSMB8
GOBP_INFLAMMATORY_RESPONSE_TO_ANTIGENIC_STIMULUS	GOBP_INFLAMMATORY_RESPONSE_TO_ANTIGENIC_STIMULUS	8	-0.825946	-1.55509	0.00792003	0.482927	0.475749	93	tags=50%, list=13%, signal=44%	PSMB4/PSMA1/ICAM1/ELANE
ICHIBA_GRAFT_VERSUS_HOST_DISEASE_35D_UP	ICHIBA_GRAFT_VERSUS_HOST_DISEASE_35D_UP	26	-0.657421	-1.5625	0.00797181	0.482927	0.475749	134	tags=31%, list=18%, signal=26%	PRTN3/MT1X/CSF1R/CLIC1/LTF/PSMB9/S100A8/S100A9
GSE29618_MONOCYTE_VS_PDC_DAY7_FLU_VACCINE_UP	GSE29618_MONOCYTE_VS_PDC_DAY7_FLU_VACCINE_UP	23	-0.670985	-1.56793	0.00799607	0.482927	0.475749	118	tags=48%, list=16%, signal=41%	PYGL/TKT/CSF1R/CLIC1/NUP214/CD163/FTL/CD93/LTA4H/TIMP1/S100A9
REACTOME_HEDGEHOG_LIGAND_BIOGENESIS	REACTOME_HEDGEHOG_LIGAND_BIOGENESIS	14	-0.743767	-1.58124	0.00803996	0.482927	0.475749	200	tags=100%, list=27%, signal=74%	PSMA6/P4HB/PSMB5/PSMB3/PSMA2/PSMA4/PSMB4/PSMB9/PSMA1/PSMA3/PSMA5/PSMA7/PSMB8
REACTOME_INTERLEUKIN_1_SIGNALING	REACTOME_INTERLEUKIN_1_SIGNALING	14	-0.743767	-1.58124	0.00803996	0.482927	0.475749	200	tags=100%, list=27%, signal=74%	PSMA6/PSMB5/SAA1/PSMB3/PSMA2/PSMA4/PSMB4/PSMB9/PSMA1/PSMA3/PSMA5/PSMA7/PSMB8
REACTOME_TCR_SIGNALING	REACTOME_TCR_SIGNALING	14	-0.743767	-1.58124	0.00803996	0.482927	0.475749	200	tags=100%, list=27%, signal=74%	PSMA6/PSMB5/VASP/PSMB3/PSMA2/PSMA4/PSMB4/PSMB9/PSMA1/PSMA3/PSMA5/PSMA7/PSMB8
GSE40274_CTRL_VS_FOXP3_AND_HELIOS_TRANSDUCED_ACTIVATED_CD4_TCELL_DN	GSE40274_CTRL_VS_FOXP3_AND_HELIOS_TRANSDUCED_ACTIVATED_CD4_TCELL_DN	19	-0.69368	-1.5517	0.00809531	0.482927	0.475749	103	tags=37%, list=14%, signal=33%	GOT2/BPGM/SDC1/GANAB/PTGR1/LGALS1/PSMB8
GSE37301_HEMATOPOIETIC_STEM_CELL_VS_CD4_TCELL_DN	GSE37301_HEMATOPOIETIC_STEM_CELL_VS_CD4_TCELL_DN	5	-0.915948	-1.5494	0.00824972	0.482927	0.475749	24	tags=40%, list=3%, signal=39%	PRG2/PSMA7
GSE6259_33D1_POS_DC_VS_BCELL_UP	GSE6259_33D1_POS_DC_VS_BCELL_UP	7	-0.849501	-1.53007	0.00841617	0.482927	0.475749	26	tags=43%, list=4%, signal=42%	NID1/VSIG4/NUCB1
MATSUMIYA_PBMC_MODIFIED_VACCINIA_ANKARA_VACCINE_AGE_18_55YO_2DY_UP	MATSUMIYA_PBMC_MODIFIED_VACCINIA_ANKARA_VACCINE_AGE_18_55YO_2DY_UP	7	-0.849059	-1.52927	0.00841617	0.482927	0.475749	105	tags=71%, list=14%, signal=62%	TYMP/PSMB9/ICAM1/S100A8/S100A9
GOBP_SMOOTH_MUSCLE_CELL_MATRIX_ADHESION	GOBP_SMOOTH_MUSCLE_CELL_MATRIX_ADHESION	3	0.964222	1.50729	0.00843997	0.482927	0.475749	23	tags=33%, list=3%, signal=32%	SERPINE1
REACTOME_CYCLIN_A_CDK2_ASSOCIATED_EVENTS_AT_S_PHASE_ENTRY	REACTOME_CYCLIN_A_CDK2_ASSOCIATED_EVENTS_AT_S_PHASE_ENTRY	14	-0.741653	-1.57675	0.00846591	0.482927	0.475749	129	tags=71%, list=18%, signal=60%	PSMB3/PSMA2/PSMA4/PSMB4/PSMB9/PSMA1/PSMA3/PSMA5/PSMA7/PSMB8
REACTOME_MITOTIC_G1_PHASE_AND_G1_S_TRANSITION	REACTOME_MITOTIC_G1_PHASE_AND_G1_S_TRANSITION	14	-0.741653	-1.57675	0.00846591	0.482927	0.475749	129	tags=71%, list=18%, signal=60%	PSMB3/PSMA2/PSMA4/PSMB4/PSMB9/PSMA1/PSMA3/PSMA5/PSMA7/PSMB8
REACTOME_S_PHASE	REACTOME_S_PHASE	14	-0.741653	-1.57675	0.00846591	0.482927	0.475749	129	tags=71%, list=18%, signal=60%	PSMB3/PSMA2/PSMA4/PSMB4/PSMB9/PSMA1/PSMA3/PSMA5/PSMA7/PSMB8
GOBP_REGULATION_OF_PEPTIDASE_ACTIVITY	GOBP_REGULATION_OF_PEPTIDASE_ACTIVITY	65	-0.541996	-1.47839	0.00846645	0.482927	0.475749	109	tags=23%, list=15%, signal=22%	PEBP1/COL6A3/WFDC2/FABP1/SNCA/CTSD/LTF/PSMB9/PSMA3/MMP9/TIMP1/S100A8/PSMB8/SERPINB1/S100A9
PATEL_SKIN_OF_BODY_ZOSTAVAX_AGE_70_93YO_VZV_CHALLENGE_6HR_TOP_30_DEG_UP	PATEL_SKIN_OF_BODY_ZOSTAVAX_AGE_70_93YO_VZV_CHALLENGE_6HR_TOP_30_DEG_UP	5	-0.914515	-1.54697	0.00850161	0.482927	0.475749	43	tags=60%, list=6%, signal=57%	IL1RL1/ICAM1/PTX3
GOMF_IRON_ION_BINDING	GOMF_IRON_ION_BINDING	8	-0.824153	-1.55171	0.00851551	0.482927	0.475749	119	tags=62%, list=16%, signal=53%	FTH1/LCN2/SNCA/LTF/FTL
GSE7460_FOXP3_MUT_VS_HET_ACT_TCONV_UP	GSE7460_FOXP3_MUT_VS_HET_ACT_TCONV_UP	14	-0.741009	-1.57538	0.0085724	0.482927	0.475749	110	tags=36%, list=15%, signal=31%	SRGN/SNCA/TNC/SPP1/NUCB1
GOBP_CANONICAL_WNT_SIGNALING_PATHWAY	GOBP_CANONICAL_WNT_SIGNALING_PATHWAY	19	-0.690263	-1.54406	0.00860445	0.482927	0.475749	129	tags=79%, list=18%, signal=67%	PSMB5/IGFBP4/PSMB3/PSMA2/PSMA4/PSMB4/IGFBP2/SDC1/PSMB9/PSMA1/IGFBP1/PSMA3/PSMA5/PSMA7/PSMB8
GOBP_FORMATION_OF_PRIMARY_GERM_LAYER	GOBP_FORMATION_OF_PRIMARY_GERM_LAYER	5	-0.914379	-1.54674	0.00862756	0.482927	0.475749	25	tags=40%, list=3%, signal=39%	MMP9/COL6A1
GOBP_T_CELL_RECEPTOR_SIGNALING_PATHWAY	GOBP_T_CELL_RECEPTOR_SIGNALING_PATHWAY	15	-0.742195	-1.58807	0.00865912	0.482927	0.475749	129	tags=67%, list=18%, signal=56%	PSMB3/PSMA2/PSMA4/PSMB4/PSMB9/PSMA1/PSMA3/PSMA5/PSMA7/PSMB8
REACTOME_NEDDYLATION	REACTOME_NEDDYLATION	15	-0.742431	-1.58857	0.00865912	0.482927	0.475749	129	tags=93%, list=18%, signal=79%	RBBP7/UBC/PSMA6/PSMB5/PSMB3/PSMA2/PSMA4/PSMB4/PSMB9/PSMA1/PSMA3/PSMA5/PSMA7/PSMB8
REACTOME_TCF_DEPENDENT_SIGNALING_IN_RESPONSE_TO_WNT	REACTOME_TCF_DEPENDENT_SIGNALING_IN_RESPONSE_TO_WNT	15	-0.743172	-1.59016	0.00865912	0.482927	0.475749	129	tags=93%, list=18%, signal=79%	XPO1/UBC/PSMA6/PSMB5/PSMB3/PSMA2/PSMA4/PSMB4/PSMB9/PSMA1/PSMA3/PSMA5/PSMA7/PSMB8
REACTOME_UCH_PROTEINASES	REACTOME_UCH_PROTEINASES	15	-0.742785	-1.58933	0.00865912	0.482927	0.475749	129	tags=67%, list=18%, signal=56%	PSMB3/PSMA2/PSMA4/PSMB4/PSMB9/PSMA1/PSMA3/PSMA5/PSMA7/PSMB8
ZHAN_MULTIPLE_MYELOMA_DN	ZHAN_MULTIPLE_MYELOMA_DN	14	-0.740564	-1.57443	0.00867889	0.482927	0.475749	118	tags=36%, list=16%, signal=31%	PYGL/LCN2/ELANE/MRC1/S100A9
GSE39110_DAY3_VS_DAY6_POST_IMMUNIZATION_CD8_TCELL_WITH_IL2_TREATMENT_UP	GSE39110_DAY3_VS_DAY6_POST_IMMUNIZATION_CD8_TCELL_WITH_IL2_TREATMENT_UP	11	-0.787131	-1.58281	0.00876048	0.482927	0.475749	67	tags=36%, list=9%, signal=34%	TNC/TXN/GDI2/LGALS1
GOBP_ANAPHASE_PROMOTING_COMPLEX_DEPENDENT_CATABOLIC_PROCESS	GOBP_ANAPHASE_PROMOTING_COMPLEX_DEPENDENT_CATABOLIC_PROCESS	13	-0.763038	-1.61053	0.00879796	0.482927	0.475749	129	tags=100%, list=18%, signal=84%	PSMA6/PSMB5/PSMB3/PSMA2/PSMA4/PSMB4/PSMB9/PSMA1/PSMA3/PSMA5/PSMA7/PSMB8
GOBP_INTERLEUKIN_1_MEDIATED_SIGNALING_PATHWAY	GOBP_INTERLEUKIN_1_MEDIATED_SIGNALING_PATHWAY	13	-0.763038	-1.61053	0.00879796	0.482927	0.475749	129	tags=100%, list=18%, signal=84%	PSMA6/PSMB5/PSMB3/PSMA2/PSMA4/PSMB4/PSMB9/PSMA1/PSMA3/PSMA5/PSMA7/PSMB8
GOBP_REGULATION_OF_TRANSCRIPTION_FROM_RNA_POLYMERASE_II_PROMOTER_IN_RESPONSE_TO_HYPOXIA	GOBP_REGULATION_OF_TRANSCRIPTION_FROM_RNA_POLYMERASE_II_PROMOTER_IN_RESPONSE_TO_HYPOXIA	13	-0.763038	-1.61053	0.00879796	0.482927	0.475749	129	tags=100%, list=18%, signal=84%	PSMA6/PSMB5/PSMB3/PSMA2/PSMA4/PSMB4/PSMB9/PSMA1/PSMA3/PSMA5/PSMA7/PSMB8
REACTOME_APC_C_CDH1_MEDIATED_DEGRADATION_OF_CDC20_AND_OTHER_APC_C_CDH1_TARGETED_PROTEINS_IN_LATE_MITOSIS_EARLY_G1	REACTOME_APC_C_CDH1_MEDIATED_DEGRADATION_OF_CDC20_AND_OTHER_APC_C_CDH1_TARGETED_PROTEINS_IN_LATE_MITOSIS_EARLY_G1	13	-0.763038	-1.61053	0.00879796	0.482927	0.475749	129	tags=100%, list=18%, signal=84%	PSMA6/PSMB5/PSMB3/PSMA2/PSMA4/PSMB4/PSMB9/PSMA1/PSMA3/PSMA5/PSMA7/PSMB8
REACTOME_APC_C_MEDIATED_DEGRADATION_OF_CELL_CYCLE_PROTEINS	REACTOME_APC_C_MEDIATED_DEGRADATION_OF_CELL_CYCLE_PROTEINS	13	-0.763038	-1.61053	0.00879796	0.482927	0.475749	129	tags=100%, list=18%, signal=84%	PSMA6/PSMB5/PSMB3/PSMA2/PSMA4/PSMB4/PSMB9/PSMA1/PSMA3/PSMA5/PSMA7/PSMB8
REACTOME_ASSEMBLY_OF_THE_PRE_REPLICATIVE_COMPLEX	REACTOME_ASSEMBLY_OF_THE_PRE_REPLICATIVE_COMPLEX	13	-0.763038	-1.61053	0.00879796	0.482927	0.475749	129	tags=100%, list=18%, signal=84%	PSMA6/PSMB5/PSMB3/PSMA2/PSMA4/PSMB4/PSMB9/PSMA1/PSMA3/PSMA5/PSMA7/PSMB8
REACTOME_ASYMMETRIC_LOCALIZATION_OF_PCP_PROTEINS	REACTOME_ASYMMETRIC_LOCALIZATION_OF_PCP_PROTEINS	13	-0.763038	-1.61053	0.00879796	0.482927	0.475749	129	tags=100%, list=18%, signal=84%	PSMA6/PSMB5/PSMB3/PSMA2/PSMA4/PSMB4/PSMB9/PSMA1/PSMA3/PSMA5/PSMA7/PSMB8
REACTOME_CELLULAR_RESPONSE_TO_HYPOXIA	REACTOME_CELLULAR_RESPONSE_TO_HYPOXIA	13	-0.763038	-1.61053	0.00879796	0.482927	0.475749	129	tags=100%, list=18%, signal=84%	PSMA6/PSMB5/PSMB3/PSMA2/PSMA4/PSMB4/PSMB9/PSMA1/PSMA3/PSMA5/PSMA7/PSMB8
REACTOME_CLEC7A_DECTIN_1_SIGNALING	REACTOME_CLEC7A_DECTIN_1_SIGNALING	13	-0.763038	-1.61053	0.00879796	0.482927	0.475749	129	tags=100%, list=18%, signal=84%	PSMA6/PSMB5/PSMB3/PSMA2/PSMA4/PSMB4/PSMB9/PSMA1/PSMA3/PSMA5/PSMA7/PSMB8
REACTOME_DECTIN_1_MEDIATED_NONCANONICAL_NF_KB_SIGNALING	REACTOME_DECTIN_1_MEDIATED_NONCANONICAL_NF_KB_SIGNALING	13	-0.763038	-1.61053	0.00879796	0.482927	0.475749	129	tags=100%, list=18%, signal=84%	PSMA6/PSMB5/PSMB3/PSMA2/PSMA4/PSMB4/PSMB9/PSMA1/PSMA3/PSMA5/PSMA7/PSMB8
REACTOME_DEFECTIVE_CFTR_CAUSES_CYSTIC_FIBROSIS	REACTOME_DEFECTIVE_CFTR_CAUSES_CYSTIC_FIBROSIS	13	-0.763038	-1.61053	0.00879796	0.482927	0.475749	129	tags=100%, list=18%, signal=84%	PSMA6/PSMB5/PSMB3/PSMA2/PSMA4/PSMB4/PSMB9/PSMA1/PSMA3/PSMA5/PSMA7/PSMB8
REACTOME_DEGRADATION_OF_AXIN	REACTOME_DEGRADATION_OF_AXIN	13	-0.763038	-1.61053	0.00879796	0.482927	0.475749	129	tags=100%, list=18%, signal=84%	PSMA6/PSMB5/PSMB3/PSMA2/PSMA4/PSMB4/PSMB9/PSMA1/PSMA3/PSMA5/PSMA7/PSMB8
REACTOME_DEGRADATION_OF_BETA_CATENIN_BY_THE_DESTRUCTION_COMPLEX	REACTOME_DEGRADATION_OF_BETA_CATENIN_BY_THE_DESTRUCTION_COMPLEX	13	-0.763038	-1.61053	0.00879796	0.482927	0.475749	129	tags=100%, list=18%, signal=84%	PSMA6/PSMB5/PSMB3/PSMA2/PSMA4/PSMB4/PSMB9/PSMA1/PSMA3/PSMA5/PSMA7/PSMB8
REACTOME_DEGRADATION_OF_DVL	REACTOME_DEGRADATION_OF_DVL	13	-0.763038	-1.61053	0.00879796	0.482927	0.475749	129	tags=100%, list=18%, signal=84%	PSMA6/PSMB5/PSMB3/PSMA2/PSMA4/PSMB4/PSMB9/PSMA1/PSMA3/PSMA5/PSMA7/PSMB8
REACTOME_DEGRADATION_OF_GLI1_BY_THE_PROTEASOME	REACTOME_DEGRADATION_OF_GLI1_BY_THE_PROTEASOME	13	-0.763038	-1.61053	0.00879796	0.482927	0.475749	129	tags=100%, list=18%, signal=84%	PSMA6/PSMB5/PSMB3/PSMA2/PSMA4/PSMB4/PSMB9/PSMA1/PSMA3/PSMA5/PSMA7/PSMB8
REACTOME_DNA_REPLICATION	REACTOME_DNA_REPLICATION	13	-0.763038	-1.61053	0.00879796	0.482927	0.475749	129	tags=100%, list=18%, signal=84%	PSMA6/PSMB5/PSMB3/PSMA2/PSMA4/PSMB4/PSMB9/PSMA1/PSMA3/PSMA5/PSMA7/PSMB8
REACTOME_DNA_REPLICATION_PRE_INITIATION	REACTOME_DNA_REPLICATION_PRE_INITIATION	13	-0.763038	-1.61053	0.00879796	0.482927	0.475749	129	tags=100%, list=18%, signal=84%	PSMA6/PSMB5/PSMB3/PSMA2/PSMA4/PSMB4/PSMB9/PSMA1/PSMA3/PSMA5/PSMA7/PSMB8
REACTOME_G1_S_DNA_DAMAGE_CHECKPOINTS	REACTOME_G1_S_DNA_DAMAGE_CHECKPOINTS	13	-0.763038	-1.61053	0.00879796	0.482927	0.475749	129	tags=100%, list=18%, signal=84%	PSMA6/PSMB5/PSMB3/PSMA2/PSMA4/PSMB4/PSMB9/PSMA1/PSMA3/PSMA5/PSMA7/PSMB8
REACTOME_HEDGEHOG_ON_STATE	REACTOME_HEDGEHOG_ON_STATE	13	-0.763038	-1.61053	0.00879796	0.482927	0.475749	129	tags=100%, list=18%, signal=84%	PSMA6/PSMB5/PSMB3/PSMA2/PSMA4/PSMB4/PSMB9/PSMA1/PSMA3/PSMA5/PSMA7/PSMB8
REACTOME_ORC1_REMOVAL_FROM_CHROMATIN	REACTOME_ORC1_REMOVAL_FROM_CHROMATIN	13	-0.763038	-1.61053	0.00879796	0.482927	0.475749	129	tags=100%, list=18%, signal=84%	PSMA6/PSMB5/PSMB3/PSMA2/PSMA4/PSMB4/PSMB9/PSMA1/PSMA3/PSMA5/PSMA7/PSMB8
REACTOME_REGULATION_OF_HMOX1_EXPRESSION_AND_ACTIVITY	REACTOME_REGULATION_OF_HMOX1_EXPRESSION_AND_ACTIVITY	13	-0.763038	-1.61053	0.00879796	0.482927	0.475749	129	tags=100%, list=18%, signal=84%	PSMA6/PSMB5/PSMB3/PSMA2/PSMA4/PSMB4/PSMB9/PSMA1/PSMA3/PSMA5/PSMA7/PSMB8
REACTOME_REGULATION_OF_PTEN_STABILITY_AND_ACTIVITY	REACTOME_REGULATION_OF_PTEN_STABILITY_AND_ACTIVITY	13	-0.763038	-1.61053	0.00879796	0.482927	0.475749	129	tags=100%, list=18%, signal=84%	PSMA6/PSMB5/PSMB3/PSMA2/PSMA4/PSMB4/PSMB9/PSMA1/PSMA3/PSMA5/PSMA7/PSMB8
REACTOME_REGULATION_OF_RAS_BY_GAPS	REACTOME_REGULATION_OF_RAS_BY_GAPS	13	-0.763038	-1.61053	0.00879796	0.482927	0.475749	129	tags=100%, list=18%, signal=84%	PSMA6/PSMB5/PSMB3/PSMA2/PSMA4/PSMB4/PSMB9/PSMA1/PSMA3/PSMA5/PSMA7/PSMB8
REACTOME_REGULATION_OF_RUNX2_EXPRESSION_AND_ACTIVITY	REACTOME_REGULATION_OF_RUNX2_EXPRESSION_AND_ACTIVITY	13	-0.763038	-1.61053	0.00879796	0.482927	0.475749	129	tags=100%, list=18%, signal=84%	PSMA6/PSMB5/PSMB3/PSMA2/PSMA4/PSMB4/PSMB9/PSMA1/PSMA3/PSMA5/PSMA7/PSMB8
REACTOME_REGULATION_OF_RUNX3_EXPRESSION_AND_ACTIVITY	REACTOME_REGULATION_OF_RUNX3_EXPRESSION_AND_ACTIVITY	13	-0.763038	-1.61053	0.00879796	0.482927	0.475749	129	tags=100%, list=18%, signal=84%	PSMA6/PSMB5/PSMB3/PSMA2/PSMA4/PSMB4/PSMB9/PSMA1/PSMA3/PSMA5/PSMA7/PSMB8
REACTOME_RUNX1_REGULATES_TRANSCRIPTION_OF_GENES_INVOLVED_IN_DIFFERENTIATION_OF_HSCS	REACTOME_RUNX1_REGULATES_TRANSCRIPTION_OF_GENES_INVOLVED_IN_DIFFERENTIATION_OF_HSCS	13	-0.763038	-1.61053	0.00879796	0.482927	0.475749	129	tags=100%, list=18%, signal=84%	PSMA6/PSMB5/PSMB3/PSMA2/PSMA4/PSMB4/PSMB9/PSMA1/PSMA3/PSMA5/PSMA7/PSMB8
REACTOME_SCF_SKP2_MEDIATED_DEGRADATION_OF_P27_P21	REACTOME_SCF_SKP2_MEDIATED_DEGRADATION_OF_P27_P21	13	-0.763038	-1.61053	0.00879796	0.482927	0.475749	129	tags=100%, list=18%, signal=84%	PSMA6/PSMB5/PSMB3/PSMA2/PSMA4/PSMB4/PSMB9/PSMA1/PSMA3/PSMA5/PSMA7/PSMB8
REACTOME_STABILIZATION_OF_P53	REACTOME_STABILIZATION_OF_P53	13	-0.763038	-1.61053	0.00879796	0.482927	0.475749	129	tags=100%, list=18%, signal=84%	PSMA6/PSMB5/PSMB3/PSMA2/PSMA4/PSMB4/PSMB9/PSMA1/PSMA3/PSMA5/PSMA7/PSMB8
REACTOME_SWITCHING_OF_ORIGINS_TO_A_POST_REPLICATIVE_STATE	REACTOME_SWITCHING_OF_ORIGINS_TO_A_POST_REPLICATIVE_STATE	13	-0.763038	-1.61053	0.00879796	0.482927	0.475749	129	tags=100%, list=18%, signal=84%	PSMA6/PSMB5/PSMB3/PSMA2/PSMA4/PSMB4/PSMB9/PSMA1/PSMA3/PSMA5/PSMA7/PSMB8
REACTOME_TNFR2_NON_CANONICAL_NF_KB_PATHWAY	REACTOME_TNFR2_NON_CANONICAL_NF_KB_PATHWAY	13	-0.763038	-1.61053	0.00879796	0.482927	0.475749	129	tags=100%, list=18%, signal=84%	PSMA6/PSMB5/PSMB3/PSMA2/PSMA4/PSMB4/PSMB9/PSMA1/PSMA3/PSMA5/PSMA7/PSMB8
REACTOME_TRANSCRIPTIONAL_REGULATION_BY_RUNX2	REACTOME_TRANSCRIPTIONAL_REGULATION_BY_RUNX2	13	-0.763038	-1.61053	0.00879796	0.482927	0.475749	129	tags=100%, list=18%, signal=84%	PSMA6/PSMB5/PSMB3/PSMA2/PSMA4/PSMB4/PSMB9/PSMA1/PSMA3/PSMA5/PSMA7/PSMB8
GOBP_NEUTROPHIL_MEDIATED_CYTOTOXICITY	GOBP_NEUTROPHIL_MEDIATED_CYTOTOXICITY	2	-0.97988	-1.36175	0.00880945	0.482927	0.475749	15	tags=100%, list=2%, signal=98%	ELANE
GOBP_NEUTROPHIL_MEDIATED_KILLING_OF_GRAM_NEGATIVE_BACTERIUM	GOBP_NEUTROPHIL_MEDIATED_KILLING_OF_GRAM_NEGATIVE_BACTERIUM	2	-0.97988	-1.36175	0.00880945	0.482927	0.475749	15	tags=100%, list=2%, signal=98%	ELANE
GOBP_NEUTROPHIL_MEDIATED_KILLING_OF_SYMBIONT_CELL	GOBP_NEUTROPHIL_MEDIATED_KILLING_OF_SYMBIONT_CELL	2	-0.97988	-1.36175	0.00880945	0.482927	0.475749	15	tags=100%, list=2%, signal=98%	ELANE
GSE12392_IFNAR_KO_VS_IFNB_KO_CD8_NEG_SPLEEN_DC_DN	GSE12392_IFNAR_KO_VS_IFNB_KO_CD8_NEG_SPLEEN_DC_DN	22	-0.690116	-1.59853	0.00887544	0.485084	0.477874	121	tags=45%, list=16%, signal=39%	ASL/REG3A/SRGN/ACTR3/REG1A/ACAA2/CD93/MPO/ELANE/MRC1
GOCC_ENDOPEPTIDASE_COMPLEX	GOCC_ENDOPEPTIDASE_COMPLEX	13	-0.761773	-1.60786	0.00901124	0.491032	0.483733	129	tags=77%, list=18%, signal=65%	PSMB3/PSMA2/PSMA4/PSMB4/PSMB9/PSMA1/PSMA3/PSMA5/PSMA7/PSMB8
RODWELL_AGING_KIDNEY_NO_BLOOD_UP	RODWELL_AGING_KIDNEY_NO_BLOOD_UP	28	-0.645065	-1.55146	0.00915912	0.4976	0.490203	108	tags=29%, list=15%, signal=25%	COL6A3/WFDC2/TNC/LTF/MCAM/TIMP1/SPARCL1/MRC1
MURATA_VIRULENCE_OF_H_PILORI	MURATA_VIRULENCE_OF_H_PILORI	4	-0.93474	-1.50407	0.0093674	0.507401	0.499859	5	tags=75%, list=1%, signal=75%	SOD2/COL6A1/S100A9
LIAN_NEUTROPHIL_GRANULE_CONSTITUENTS	LIAN_NEUTROPHIL_GRANULE_CONSTITUENTS	9	-0.833612	-1.60851	0.00946419	0.511108	0.503511	110	tags=78%, list=15%, signal=67%	SRGN/LCN2/CTSD/LTF/MPO/MMP9/ELANE
ONDER_CDH1_TARGETS_2_DN	ONDER_CDH1_TARGETS_2_DN	22	-0.687173	-1.59171	0.00956193	0.511108	0.503511	151	tags=55%, list=21%, signal=45%	CDH1/SAA1/KRT16/LCN2/CORO1A/SNCA/SDC1/ICAM1/MMP9/S100A8/SERPINB1/S100A9
GSE30971_WBP7_HET_VS_KO_MACROPHAGE_DN	GSE30971_WBP7_HET_VS_KO_MACROPHAGE_DN	6	-0.870106	-1.53192	0.00956684	0.511108	0.503511	33	tags=83%, list=4%, signal=80%	ENPP2/CD93/PTX3/SERPINB1/CHI3L1
GSE38304_MYC_NEG_VS_POS_GC_BCELL_DN	GSE38304_MYC_NEG_VS_POS_GC_BCELL_DN	6	-0.870733	-1.53302	0.00956684	0.511108	0.503511	8	tags=50%, list=1%, signal=50%	GBE1/SERPINB1/NUCB1
GSE339_CD4POS_VS_CD4CD8DN_DC_IN_CULTURE_DN	GSE339_CD4POS_VS_CD4CD8DN_DC_IN_CULTURE_DN	17	-0.709354	-1.55325	0.00957626	0.511108	0.503511	53	tags=29%, list=7%, signal=28%	ACAA2/APOA5/DDT/TSKU/MRC1
GOBP_ACUTE_INFLAMMATORY_RESPONSE_TO_ANTIGENIC_STIMULUS	GOBP_ACUTE_INFLAMMATORY_RESPONSE_TO_ANTIGENIC_STIMULUS	5	-0.910977	-1.54099	0.00963514	0.511252	0.503653	28	tags=40%, list=4%, signal=39%	ICAM1/ELANE
WP_LUNG_FIBROSIS	WP_LUNG_FIBROSIS	5	-0.91092	-1.54089	0.00963514	0.511252	0.503653	55	tags=80%, list=7%, signal=75%	SPP1/MMP9/PTX3/TIMP1
GSE22935_UNSTIM_VS_48H_MBOVIS_BCG_STIM_MACROPHAGE_UP	GSE22935_UNSTIM_VS_48H_MBOVIS_BCG_STIM_MACROPHAGE_UP	4	-0.931894	-1.49949	0.0097446	0.515052	0.507396	14	tags=75%, list=2%, signal=74%	MDH2/CA3/SELENBP1
GOMF_PLATELET_DERIVED_GROWTH_FACTOR_BINDING	GOMF_PLATELET_DERIVED_GROWTH_FACTOR_BINDING	1	-0.995918	-1.31791	0.00976335	0.515052	0.507396	5	tags=100%, list=1%, signal=99%
RUTELLA_RESPONSE_TO_HGF_DN	RUTELLA_RESPONSE_TO_HGF_DN	19	-0.685612	-1.53365	0.00982637	0.516878	0.509195	105	tags=37%, list=14%, signal=32%	TYMP/HNRNPA1/NUP214/CD163/LTA4H/AMY1A/S100A9
REACTOME_HIV_INFECTION	REACTOME_HIV_INFECTION	21	-0.677754	-1.5539	0.00995481	0.520002	0.512272	144	tags=57%, list=20%, signal=47%	NPM1/PSMB3/PSMA2/PSMA4/PSMB4/PSMB9/PSMA1/NUP214/PSMA3/PSMA5/PSMA7/PSMB8
REACTOME_HOST_INTERACTIONS_OF_HIV_FACTORS	REACTOME_HOST_INTERACTIONS_OF_HIV_FACTORS	21	-0.677754	-1.5539	0.00995481	0.520002	0.512272	144	tags=57%, list=20%, signal=47%	NPM1/PSMB3/PSMA2/PSMA4/PSMB4/PSMB9/PSMA1/NUP214/PSMA3/PSMA5/PSMA7/PSMB8
BRUINS_UVC_RESPONSE_VIA_TP53_GROUP_A	BRUINS_UVC_RESPONSE_VIA_TP53_GROUP_A	44	-0.58503	-1.50036	0.00999259	0.520002	0.512272	151	tags=32%, list=21%, signal=27%	CDH1/KRT16/KRT85/ASL/YWHAG/SNCA/TNC/CHGA/MYO5A/CSRP1/APOA5/CD93/ELANE/SELENBP1
MIKKELSEN_PARTIALLY_REPROGRAMMED_TO_PLURIPOTENCY	MIKKELSEN_PARTIALLY_REPROGRAMMED_TO_PLURIPOTENCY	1	0.995918	1.31419	0.01	0.520002	0.512272	4	tags=100%, list=1%, signal=100%	CDH13
PID_AMB2_NEUTROPHILS_PATHWAY	PID_AMB2_NEUTROPHILS_PATHWAY	8	-0.817595	-1.53937	0.0100638	0.521825	0.514068	28	tags=25%, list=4%, signal=24%	ICAM1/MMP9
GOCC_COATED_VESICLE_MEMBRANE	GOCC_COATED_VESICLE_MEMBRANE	11	0.754978	1.69099	0.0101957	0.527163	0.519327	10	tags=18%, list=1%, signal=18%	CD59/HLA-C
GOBP_REGULATION_OF_STEM_CELL_DIFFERENTIATION	GOBP_REGULATION_OF_STEM_CELL_DIFFERENTIATION	13	-0.756003	-1.59568	0.0102909	0.530079	0.5222	129	tags=77%, list=18%, signal=65%	PSMB3/PSMA2/PSMA4/PSMB4/PSMB9/PSMA1/PSMA3/PSMA5/PSMA7/PSMB8
GSE3982_EOSINOPHIL_VS_TH1_UP	GSE3982_EOSINOPHIL_VS_TH1_UP	9	0.806745	1.72878	0.0103103	0.530079	0.5222	53	tags=33%, list=7%, signal=31%	HLA-C/F7/THBS4
GSE29618_MONOCYTE_VS_MDC_UP	GSE29618_MONOCYTE_VS_MDC_UP	24	-0.668828	-1.57559	0.0103545	0.530853	0.522962	118	tags=42%, list=16%, signal=36%	PYGL/TKT/CTSD/CD163/FTL/CD93/LTA4H/MPO/S100A8/S100A9
REACTOME_AUF1_HNRNP_D0_BINDS_AND_DESTABILIZES_MRNA	REACTOME_AUF1_HNRNP_D0_BINDS_AND_DESTABILIZES_MRNA	15	-0.737721	-1.5785	0.0104877	0.53224	0.524329	129	tags=67%, list=18%, signal=56%	PSMB3/PSMA2/PSMA4/PSMB4/PSMB9/PSMA1/PSMA3/PSMA5/PSMA7/PSMB8
BLANCO_MELO_COVID19_BRONCHIAL_EPITHELIAL_CELLS_SARS_COV_2_INFECTION_UP	BLANCO_MELO_COVID19_BRONCHIAL_EPITHELIAL_CELLS_SARS_COV_2_INFECTION_UP	16	-0.711511	-1.55282	0.0105226	0.53224	0.524329	116	tags=62%, list=16%, signal=54%	KRT75/SOD2/VNN1/SAA2/CORO1A/BPGM/ICAM1/S100A8/SERPINB1/S100A9
GOMF_GTPASE_ACTIVITY	GOMF_GTPASE_ACTIVITY	17	0.681867	1.78604	0.0105347	0.53224	0.524329	108	tags=47%, list=15%, signal=41%	RAB11A/TUBB8/RGS18/EEF2/TUBA8/RAC1/RAB27B/TUBA1C
GSE1432_CTRL_VS_IFNG_24H_MICROGLIA_DN	GSE1432_CTRL_VS_IFNG_24H_MICROGLIA_DN	19	-0.681538	-1.52454	0.0105402	0.53224	0.524329	125	tags=42%, list=17%, signal=36%	CES1/PSMA2/MT1X/PSMA4/LAP3/PSMB9/ICAM1/PSMB8
GSE17721_LPS_VS_POLYIC_8H_BMDC_DN	GSE17721_LPS_VS_POLYIC_8H_BMDC_DN	6	-0.867324	-1.52702	0.0105544	0.53224	0.524329	16	tags=67%, list=2%, signal=66%	ASL/S100A8/ELANE/SERPINB1
GSE34205_HEALTHY_VS_FLU_INF_INFANT_PBMC_DN	GSE34205_HEALTHY_VS_FLU_INF_INFANT_PBMC_DN	21	-0.676695	-1.55147	0.0105571	0.53224	0.524329	94	tags=33%, list=13%, signal=30%	LSM1/CTSD/LTF/FTL/MPO/S100A8/S100A9
GSE6259_DEC205_POS_DC_VS_BCELL_DN	GSE6259_DEC205_POS_DC_VS_BCELL_DN	11	-0.782124	-1.57274	0.0106576	0.535316	0.527359	93	tags=45%, list=13%, signal=40%	PSMB4/PSMB9/CSRP1/ICAM1/PSMB8
GOBP_ACTIVATION_OF_INNATE_IMMUNE_RESPONSE	GOBP_ACTIVATION_OF_INNATE_IMMUNE_RESPONSE	16	-0.707533	-1.54414	0.010731	0.535316	0.527359	129	tags=62%, list=18%, signal=53%	PSMB3/PSMA2/PSMA4/PSMB4/PSMB9/PSMA1/PSMA3/PSMA5/PSMA7/PSMB8
GOBP_HEMATOPOIETIC_PROGENITOR_CELL_DIFFERENTIATION	GOBP_HEMATOPOIETIC_PROGENITOR_CELL_DIFFERENTIATION	16	-0.70799	-1.54513	0.010731	0.535316	0.527359	129	tags=88%, list=18%, signal=74%	KRT75/PSMA6/PSMB5/PSMB3/PSMA2/PSMA4/PSMB4/CSF1R/PSMB9/PSMA1/PSMA3/PSMA5/PSMA7/PSMB8
BIOCARTA_LYMPHOCYTE_PATHWAY	BIOCARTA_LYMPHOCYTE_PATHWAY	3	-0.947488	-1.41417	0.0107946	0.535316	0.527359	28	tags=67%, list=4%, signal=64%	SELL/ICAM1
BIOCARTA_MONOCYTE_PATHWAY	BIOCARTA_MONOCYTE_PATHWAY	3	-0.947488	-1.41417	0.0107946	0.535316	0.527359	28	tags=67%, list=4%, signal=64%	SELL/ICAM1
BIOCARTA_NEUTROPHIL_PATHWAY	BIOCARTA_NEUTROPHIL_PATHWAY	3	-0.947488	-1.41417	0.0107946	0.535316	0.527359	28	tags=67%, list=4%, signal=64%	SELL/ICAM1
REACTOME_POST_TRANSLATIONAL_PROTEIN_MODIFICATION	REACTOME_POST_TRANSLATIONAL_PROTEIN_MODIFICATION	107	-0.485274	-1.40441	0.010897	0.538926	0.530915	102	tags=23%, list=14%, signal=24%	PSMA4/RPS2/PSMB4/FSTL1/GOLM1/SPTB/TNC/PSMB9/PSMA1/SPP1/NUP214/GANAB/IGFBP1/APOA5/PRKCSH/PSMA3/DAG1/LGALS1/TIMP1/SPARCL1/PSMA5/PSMA7/B4GALT1/PSMB8/NUCB1
HP_ABNORMALITY_OF_LATERAL_VENTRICLE	HP_ABNORMALITY_OF_LATERAL_VENTRICLE	5	0.882353	1.59375	0.0109572	0.540436	0.532403	91	tags=100%, list=12%, signal=88%	PSAT1/RAB11A/TUBA8/RAC1/CLTC
GSE45365_NK_CELL_VS_CD11B_DC_DN	GSE45365_NK_CELL_VS_CD11B_DC_DN	23	-0.661566	-1.54592	0.0110063	0.540923	0.532883	28	tags=30%, list=4%, signal=30%	ICAM1/MMP9/PTX3/TIMP1/S100A8/CHI3L1/S100A9
HP_ABNORMALITY_OF_THE_ALVEOLAR_RIDGES	HP_ABNORMALITY_OF_THE_ALVEOLAR_RIDGES	3	-0.946571	-1.41281	0.0110595	0.540923	0.532883	15	tags=67%, list=2%, signal=66%	C1S/ELANE
HP_ATROPHY_OF_ALVEOLAR_RIDGES	HP_ATROPHY_OF_ALVEOLAR_RIDGES	3	-0.946571	-1.41281	0.0110595	0.540923	0.532883	15	tags=67%, list=2%, signal=66%	C1S/ELANE
GOBP_PROTEIN_CONTAINING_COMPLEX_REMODELING	GOBP_PROTEIN_CONTAINING_COMPLEX_REMODELING	18	-0.704457	-1.55527	0.011086	0.540923	0.532883	42	tags=22%, list=6%, signal=21%	LIPC/APOA5/PLA2G2A/MPO
GOBP_LEUKOCYTE_ADHESION_TO_VASCULAR_ENDOTHELIAL_CELL	GOBP_LEUKOCYTE_ADHESION_TO_VASCULAR_ENDOTHELIAL_CELL	4	-0.928867	-1.49462	0.0111277	0.541508	0.533459	28	tags=75%, list=4%, signal=73%	VCAM1/ICAM1/ELANE
GOBP_POSITIVE_REGULATION_OF_COAGULATION	GOBP_POSITIVE_REGULATION_OF_COAGULATION	11	0.750086	1.68003	0.0111877	0.542976	0.534905	50	tags=18%, list=7%, signal=17%	SERPINE1/F7
NADERI_BREAST_CANCER_PROGNOSIS_DN	NADERI_BREAST_CANCER_PROGNOSIS_DN	3	-0.945474	-1.41117	0.0113244	0.545461	0.537354	19	tags=67%, list=3%, signal=65%	C1S/SPARCL1
FLECHNER_BIOPSY_KIDNEY_TRANSPLANT_REJECTED_VS_OK_UP	FLECHNER_BIOPSY_KIDNEY_TRANSPLANT_REJECTED_VS_OK_UP	19	-0.677469	-1.51544	0.0113588	0.545461	0.537354	108	tags=53%, list=15%, signal=46%	COL6A3/TYMP/LCN2/CORO1A/LTF/CD163/VSIG4/MMP9/S100A8/PSMB8
GSE2128_CTRL_VS_MIMETOPE_NEGATIVE_SELECTION_DP_THYMOCYTE_NOD_UP	GSE2128_CTRL_VS_MIMETOPE_NEGATIVE_SELECTION_DP_THYMOCYTE_NOD_UP	19	-0.677389	-1.51526	0.0113588	0.545461	0.537354	89	tags=21%, list=12%, signal=19%	CSF1R/PTGR1/B4GALT1/NUCB1
GSE360_L_DONOVANI_VS_B_MALAYI_HIGH_DOSE_DC_UP	GSE360_L_DONOVANI_VS_B_MALAYI_HIGH_DOSE_DC_UP	19	-0.677837	-1.51626	0.0113588	0.545461	0.537354	105	tags=47%, list=14%, signal=42%	KRT16/TYMP/KRT86/PKLR/UGP2/MMP9/TIMP1/B4GALT1/CHI3L1
HP_ABNORMALITY_OF_HUMORAL_IMMUNITY	HP_ABNORMALITY_OF_HUMORAL_IMMUNITY	41	-0.584468	-1.48103	0.0114284	0.54607	0.537954	93	tags=24%, list=13%, signal=23%	CFHR3/MTHFD1/HYOU1/KRT1/PSMB4/PSMB9/SPP1/ELANE/KRT9/PSMB8
WP_EICOSANOID_METABOLISM_VIA_LIPO_OXYGENASES_LOX	WP_EICOSANOID_METABOLISM_VIA_LIPO_OXYGENASES_LOX	3	-0.944184	-1.40924	0.0115892	0.54607	0.537954	38	tags=100%, list=5%, signal=95%	PTGR1/LTA4H
GOBP_ANTIMICROBIAL_HUMORAL_IMMUNE_RESPONSE_MEDIATED_BY_ANTIMICROBIAL_PEPTIDE	GOBP_ANTIMICROBIAL_HUMORAL_IMMUNE_RESPONSE_MEDIATED_BY_ANTIMICROBIAL_PEPTIDE	13	-0.751408	-1.58598	0.0116815	0.54607	0.537954	126	tags=46%, list=17%, signal=39%	DEFA3/REG3A/REG1A/LTF/ELANE/S100A9
HP_ABNORMALITY_OF_THE_METACARPAL_BONES	HP_ABNORMALITY_OF_THE_METACARPAL_BONES	5	0.880854	1.59104	0.0116816	0.54607	0.537954	21	tags=20%, list=3%, signal=20%	SPARC
HP_ABNORMAL_METACARPAL_MORPHOLOGY	HP_ABNORMAL_METACARPAL_MORPHOLOGY	5	0.880854	1.59104	0.0116816	0.54607	0.537954	21	tags=20%, list=3%, signal=20%	SPARC
REACTOME_SCAVENGING_OF_HEME_FROM_PLASMA	REACTOME_SCAVENGING_OF_HEME_FROM_PLASMA	18	-0.699154	-1.54357	0.0117076	0.54607	0.537954	46	tags=44%, list=6%, signal=43%	IGKV2D-28/IGHV3-23/HPX/HP/IGKV1-5/IGKV1-12/CD163/IGHA2
KANG_AR_TARGETS_UP	KANG_AR_TARGETS_UP	3	-0.943609	-1.40839	0.0117217	0.54607	0.537954	25	tags=67%, list=3%, signal=65%	MMP9/COL6A1
GSE2585_CTEC_VS_THYMIC_MACROPHAGE_DN	GSE2585_CTEC_VS_THYMIC_MACROPHAGE_DN	8	0.807286	1.66468	0.0117479	0.54607	0.537954	74	tags=50%, list=10%, signal=45%	ILK/CKB/LNPEP/PFKP
GSE42021_CD24INT_VS_CD24LOW_TCONV_THYMUS_UP	GSE42021_CD24INT_VS_CD24LOW_TCONV_THYMUS_UP	15	-0.733746	-1.56999	0.0117828	0.54607	0.537954	111	tags=47%, list=15%, signal=40%	CKM/LAP3/PSMB9/CSRP1/ICAM1/CSH2/PSMB8
LI_PBMC_MENACTRA_AGE_18_45YO_ANTI_DT_ANTIBODY_CORRELATION_PROFILE_3DY_DN	LI_PBMC_MENACTRA_AGE_18_45YO_ANTI_DT_ANTIBODY_CORRELATION_PROFILE_3DY_DN	9	-0.827955	-1.5976	0.0117867	0.54607	0.537954	22	tags=78%, list=3%, signal=76%	C2/C1QC/C1R/C1S/A2M/C7/PTX3
MATTHEWS_AP1_TARGETS	MATTHEWS_AP1_TARGETS	4	-0.928026	-1.49326	0.0118821	0.54607	0.537954	55	tags=75%, list=7%, signal=70%	SPP1/IL1RL1/CA3
GSE1460_DP_THYMOCYTE_VS_NAIVE_CD4_TCELL_ADULT_BLOOD_UP	GSE1460_DP_THYMOCYTE_VS_NAIVE_CD4_TCELL_ADULT_BLOOD_UP	12	-0.75018	-1.55051	0.0119032	0.54607	0.537954	143	tags=75%, list=19%, signal=61%	PSMA6/PDLIM1/GBE1/SORD/COL6A3/FSTL1/NUP214/CD93/PSMA5
GOBP_POSITIVE_REGULATION_OF_MAPK_CASCADE	GOBP_POSITIVE_REGULATION_OF_MAPK_CASCADE	29	-0.616118	-1.49352	0.0119183	0.54607	0.537954	29	tags=31%, list=4%, signal=31%	NRP1/IGFBP4/SAA1/CSF1R/PLA2G2A/ICAM1/DDT/ELANE/CHI3L1
GSE29618_MONOCYTE_VS_PDC_UP	GSE29618_MONOCYTE_VS_PDC_UP	23	-0.657143	-1.53558	0.0119803	0.54607	0.537954	118	tags=43%, list=16%, signal=38%	PYGL/TKT/CSF1R/CSRP1/NUP214/CD163/FTL/CD93/TIMP1/S100A9
GOBP_ACTIVATION_OF_NF_KAPPAB_INDUCING_KINASE_ACTIVITY	GOBP_ACTIVATION_OF_NF_KAPPAB_INDUCING_KINASE_ACTIVITY	1	-0.994558	-1.31611	0.0121124	0.54607	0.537954	6	tags=100%, list=1%, signal=99%
GOBP_AMINO_SUGAR_CATABOLIC_PROCESS	GOBP_AMINO_SUGAR_CATABOLIC_PROCESS	1	-0.994558	-1.31611	0.0121124	0.54607	0.537954	6	tags=100%, list=1%, signal=99%
GOBP_AMINO_SUGAR_METABOLIC_PROCESS	GOBP_AMINO_SUGAR_METABOLIC_PROCESS	1	-0.994558	-1.31611	0.0121124	0.54607	0.537954	6	tags=100%, list=1%, signal=99%
GOBP_CHITIN_METABOLIC_PROCESS	GOBP_CHITIN_METABOLIC_PROCESS	1	-0.994558	-1.31611	0.0121124	0.54607	0.537954	6	tags=100%, list=1%, signal=99%
GOBP_GLUCOSAMINE_CONTAINING_COMPOUND_CATABOLIC_PROCESS	GOBP_GLUCOSAMINE_CONTAINING_COMPOUND_CATABOLIC_PROCESS	1	-0.994558	-1.31611	0.0121124	0.54607	0.537954	6	tags=100%, list=1%, signal=99%
GOBP_GLUCOSAMINE_CONTAINING_COMPOUND_METABOLIC_PROCESS	GOBP_GLUCOSAMINE_CONTAINING_COMPOUND_METABOLIC_PROCESS	1	-0.994558	-1.31611	0.0121124	0.54607	0.537954	6	tags=100%, list=1%, signal=99%
GOMF_CHITIN_BINDING	GOMF_CHITIN_BINDING	1	-0.994558	-1.31611	0.0121124	0.54607	0.537954	6	tags=100%, list=1%, signal=99%
HP_NEGATIVISM	HP_NEGATIVISM	1	-0.994558	-1.31611	0.0121124	0.54607	0.537954	6	tags=100%, list=1%, signal=99%
HP_SOCIAL_AND_OCCUPATIONAL_DETERIORATION	HP_SOCIAL_AND_OCCUPATIONAL_DETERIORATION	1	-0.994558	-1.31611	0.0121124	0.54607	0.537954	6	tags=100%, list=1%, signal=99%
ACOSTA_PROLIFERATION_INDEPENDENT_MYC_TARGETS_DN	ACOSTA_PROLIFERATION_INDEPENDENT_MYC_TARGETS_DN	12	-0.747796	-1.54558	0.0121216	0.54607	0.537954	74	tags=50%, list=10%, signal=46%	CTSD/LASP1/MCAM/UGP2/CSH2/SELENBP1
HADDAD_T_LYMPHOCYTE_AND_NK_PROGENITOR_DN	HADDAD_T_LYMPHOCYTE_AND_NK_PROGENITOR_DN	12	-0.748126	-1.54627	0.0121216	0.54607	0.537954	159	tags=58%, list=22%, signal=46%	VCAN/PRTN3/CSF1R/LGALS1/MPO/S100A8/ELANE
GOBP_LEUKOCYTE_MIGRATION	GOBP_LEUKOCYTE_MIGRATION	58	-0.536226	-1.43472	0.0121567	0.546303	0.538183	90	tags=21%, list=12%, signal=20%	CORO1A/CSF1R/SDC1/CHGA/IGHA2/ICAM1/MMP9/DDT/S100A8/ELANE/B4GALT1/S100A9
GSE24634_NAIVE_CD4_TCELL_VS_DAY7_IL4_CONV_TREG_DN	GSE24634_NAIVE_CD4_TCELL_VS_DAY7_IL4_CONV_TREG_DN	14	-0.731765	-1.55572	0.0123068	0.550706	0.54252	82	tags=43%, list=11%, signal=39%	LAP3/MYO5A/PSMA1/LGALS1/PSMA5/SERPINB1
GSE36392_TYPE_2_MYELOID_VS_MAC_IL25_TREATED_LUNG_DN	GSE36392_TYPE_2_MYELOID_VS_MAC_IL25_TREATED_LUNG_DN	1	0.994558	1.31239	0.012406	0.550706	0.54252	5	tags=100%, list=1%, signal=99%	DCXR
KOHOUTEK_CCNT2_TARGETS	KOHOUTEK_CCNT2_TARGETS	1	0.994558	1.31239	0.012406	0.550706	0.54252	5	tags=100%, list=1%, signal=99%	DCXR
QUINTENS_EMBRYONIC_BRAIN_RESPONSE_TO_IR	QUINTENS_EMBRYONIC_BRAIN_RESPONSE_TO_IR	1	0.994558	1.31239	0.012406	0.550706	0.54252	5	tags=100%, list=1%, signal=99%	DCXR
THILLAINADESAN_ZNF217_TARGETS_UP	THILLAINADESAN_ZNF217_TARGETS_UP	1	0.994558	1.31239	0.012406	0.550706	0.54252	5	tags=100%, list=1%, signal=99%	DCXR
GSE360_L_DONOVANI_VS_B_MALAYI_LOW_DOSE_DC_DN	GSE360_L_DONOVANI_VS_B_MALAYI_LOW_DOSE_DC_DN	12	-0.746465	-1.54283	0.0125584	0.553031	0.54481	96	tags=42%, list=13%, signal=37%	TKT/CSRP1/CD163/LTA4H/VSIG4
GSE15733_BM_VS_SPLEEN_MEMORY_CD4_TCELL_UP	GSE15733_BM_VS_SPLEEN_MEMORY_CD4_TCELL_UP	17	-0.699361	-1.53137	0.0125887	0.553031	0.54481	134	tags=47%, list=18%, signal=39%	PRTN3/PYGL/LTF/IL1RL1/ICAM1/MPO/MMP9/S100A8
GOBP_CARTILAGE_DEVELOPMENT_INVOLVED_IN_ENDOCHONDRAL_BONE_MORPHOGENESIS	GOBP_CARTILAGE_DEVELOPMENT_INVOLVED_IN_ENDOCHONDRAL_BONE_MORPHOGENESIS	2	-0.976425	-1.35695	0.0126336	0.553031	0.54481	17	tags=100%, list=2%, signal=98%	TSKU
GOBP_ENDOCHONDRAL_BONE_MORPHOGENESIS	GOBP_ENDOCHONDRAL_BONE_MORPHOGENESIS	2	-0.976425	-1.35695	0.0126336	0.553031	0.54481	17	tags=100%, list=2%, signal=98%	TSKU
GOBP_GROWTH_PLATE_CARTILAGE_DEVELOPMENT	GOBP_GROWTH_PLATE_CARTILAGE_DEVELOPMENT	2	-0.976425	-1.35695	0.0126336	0.553031	0.54481	17	tags=100%, list=2%, signal=98%	TSKU
GSE17721_POLYIC_VS_GARDIQUIMOD_24H_BMDC_UP	GSE17721_POLYIC_VS_GARDIQUIMOD_24H_BMDC_UP	7	-0.837408	-1.50829	0.0126554	0.553031	0.54481	65	tags=43%, list=9%, signal=39%	SDC1/ACAA2/S100A8
GOBP_RESPONSE_TO_TUMOR_NECROSIS_FACTOR	GOBP_RESPONSE_TO_TUMOR_NECROSIS_FACTOR	29	-0.610889	-1.48084	0.0126934	0.553031	0.54481	129	tags=45%, list=18%, signal=38%	PSMB3/PSMA2/PSMA4/PSMB4/PSMB9/PSMA1/DHX9/PSMA3/ICAM1/PSMA5/PSMA7/PSMB8/CHI3L1
GSE21670_TGFB_VS_TGFB_AND_IL6_TREATED_CD4_TCELL_UP	GSE21670_TGFB_VS_TGFB_AND_IL6_TREATED_CD4_TCELL_UP	9	-0.826212	-1.59423	0.0127202	0.553031	0.54481	88	tags=44%, list=12%, signal=40%	COLEC10/NUP214/MRC1/SELENBP1
HUMMERICH_SKIN_CANCER_PROGRESSION_UP	HUMMERICH_SKIN_CANCER_PROGRESSION_UP	18	-0.693645	-1.5314	0.0127436	0.553031	0.54481	137	tags=61%, list=19%, signal=51%	SOD2/COL18A1/KRT16/MT1X/SAA2/COL6A3/LCN2/CTSD/PRKCSH/MMP9/SERPINB1
GOBP_PROTEIN_NITROSYLATION	GOBP_PROTEIN_NITROSYLATION	4	-0.925266	-1.48882	0.0127622	0.553031	0.54481	54	tags=75%, list=7%, signal=70%	TXN/S100A8/S100A9
GSE30971_WBP7_HET_VS_KO_MACROPHAGE_4H_LPS_STIM_UP	GSE30971_WBP7_HET_VS_KO_MACROPHAGE_4H_LPS_STIM_UP	15	-0.730879	-1.56386	0.0128637	0.555313	0.547059	54	tags=60%, list=7%, signal=57%	SOD2/PSMA6/GSR/PSMB5/TXN/PSMA3/ICAM1/PTX3/PSMA5
SCHOEN_NFKB_SIGNALING	SCHOEN_NFKB_SIGNALING	7	-0.837036	-1.50762	0.012906	0.555313	0.547059	25	tags=43%, list=3%, signal=42%	SERPINA3/MMP9/PTX3
GSE22886_NAIVE_CD4_TCELL_VS_MEMORY_TCELL_UP	GSE22886_NAIVE_CD4_TCELL_VS_MEMORY_TCELL_UP	9	-0.824898	-1.5917	0.0129536	0.555313	0.547059	96	tags=44%, list=13%, signal=39%	TKT/MPO/ELANE/COL6A1
GSE6259_FLT3L_INDUCED_33D1_POS_DC_VS_CD8_TCELL_UP	GSE6259_FLT3L_INDUCED_33D1_POS_DC_VS_CD8_TCELL_UP	9	-0.824694	-1.5913	0.0129536	0.555313	0.547059	84	tags=56%, list=11%, signal=50%	CLIC1/CTSD/CD163/LGALS1/MRC1
FERRANDO_T_ALL_WITH_MLL_ENL_FUSION_DN	FERRANDO_T_ALL_WITH_MLL_ENL_FUSION_DN	13	-0.748435	-1.57971	0.0129675	0.555313	0.547059	120	tags=62%, list=16%, signal=52%	PSMA6/PSMA2/SORD/GOT2/HINT1/IGFBP2/TXN/ACAA2
LU_EZH2_TARGETS_UP	LU_EZH2_TARGETS_UP	11	-0.774086	-1.55657	0.0131216	0.560576	0.552243	59	tags=45%, list=8%, signal=42%	HNRNPA3/PSMB9/GANAB/B4GALT1/PSMB8
GSE7831_UNSTIM_VS_INFLUENZA_STIM_PDC_4H_DN	GSE7831_UNSTIM_VS_INFLUENZA_STIM_PDC_4H_DN	12	-0.744566	-1.53891	0.0132136	0.560576	0.552243	75	tags=42%, list=10%, signal=38%	RNASE4/GOLM1/CTSD/PTGR1/DAG1
KAMIKUBO_MYELOID_CEBPA_NETWORK	KAMIKUBO_MYELOID_CEBPA_NETWORK	12	-0.744052	-1.53785	0.0132136	0.560576	0.552243	134	tags=58%, list=18%, signal=49%	PRTN3/LCN2/LTF/LGALS1/S100A8/SERPINB1/S100A9
MCBRYAN_PUBERTAL_BREAST_6_7WK_DN	MCBRYAN_PUBERTAL_BREAST_6_7WK_DN	12	-0.744532	-1.53884	0.0132136	0.560576	0.552243	117	tags=67%, list=16%, signal=57%	VCAN/MT1X/IGFBP2/BPGM/TNC/SDC1/TIMP1/S100A8
GOBP_POSITIVE_REGULATION_OF_INTRINSIC_APOPTOTIC_SIGNALING_PATHWAY	GOBP_POSITIVE_REGULATION_OF_INTRINSIC_APOPTOTIC_SIGNALING_PATHWAY	5	-0.90056	-1.52337	0.0132901	0.562091	0.553736	16	tags=40%, list=2%, signal=39%	S100A8/S100A9
SCHAEFFER_PROSTATE_DEVELOPMENT_AND_CANCER_BOX2_UP	SCHAEFFER_PROSTATE_DEVELOPMENT_AND_CANCER_BOX2_UP	3	-0.939301	-1.40195	0.0133111	0.562091	0.553736	19	tags=67%, list=3%, signal=65%	FBLN1/SPARCL1
SAKAI_CHRONIC_HEPATITIS_VS_LIVER_CANCER_DN	SAKAI_CHRONIC_HEPATITIS_VS_LIVER_CANCER_DN	2	-0.974894	-1.35483	0.0134531	0.565952	0.557539	10	tags=100%, list=1%, signal=99%	CSH2
HP_INTRACRANIAL_HEMORRHAGE	HP_INTRACRANIAL_HEMORRHAGE	21	0.623801	1.74946	0.0135652	0.565952	0.557539	50	tags=14%, list=7%, signal=14%	SPARC/SERPINE1/F7
GSE17721_PAM3CSK4_VS_GADIQUIMOD_0.5H_BMDC_UP	GSE17721_PAM3CSK4_VS_GADIQUIMOD_0.5H_BMDC_UP	12	-0.74282	-1.5353	0.0136504	0.565952	0.557539	45	tags=58%, list=6%, signal=56%	KRT33B/UBC/SOD2/GANAB/IL1RL1/PTGR1/FTL
GOBP_NEGATIVE_REGULATION_OF_LEUKOCYTE_MIGRATION	GOBP_NEGATIVE_REGULATION_OF_LEUKOCYTE_MIGRATION	3	-0.936781	-1.39819	0.0137097	0.565952	0.557539	20	tags=67%, list=3%, signal=65%	C5/DDT
GOBP_OLIGOSACCHARIDE_METABOLIC_PROCESS	GOBP_OLIGOSACCHARIDE_METABOLIC_PROCESS	3	-0.937506	-1.39928	0.0137097	0.565952	0.557539	23	tags=100%, list=3%, signal=97%	AMY1A/B4GALT1
TERAMOTO_OPN_TARGETS_CLUSTER_6	TERAMOTO_OPN_TARGETS_CLUSTER_6	3	-0.936384	-1.3976	0.0137097	0.565952	0.557539	19	tags=67%, list=3%, signal=65%	SERPINF1/SPARCL1
GSE14308_TH1_VS_NAIVE_CD4_TCELL_DN	GSE14308_TH1_VS_NAIVE_CD4_TCELL_DN	6	-0.859606	-1.51343	0.0137699	0.565952	0.557539	45	tags=67%, list=6%, signal=63%	HNRNPC/GANAB/DAG1/B4GALT1
GOBP_RESPONSE_TO_RADIATION	GOBP_RESPONSE_TO_RADIATION	11	-0.77192	-1.55222	0.0137944	0.565952	0.557539	54	tags=45%, list=7%, signal=43%	TXN/ICAM1/MMP9/TIMP1/ELANE
ICHIBA_GRAFT_VERSUS_HOST_DISEASE_D7_UP	ICHIBA_GRAFT_VERSUS_HOST_DISEASE_D7_UP	15	-0.727189	-1.55596	0.0139447	0.565952	0.557539	84	tags=27%, list=11%, signal=24%	CLIC1/PSMB9/ICAM1/PSMB8
REACTOME_C_TYPE_LECTIN_RECEPTORS_CLRS	REACTOME_C_TYPE_LECTIN_RECEPTORS_CLRS	15	-0.726078	-1.55358	0.0139447	0.565952	0.557539	129	tags=67%, list=18%, signal=56%	PSMB3/PSMA2/PSMA4/PSMB4/PSMB9/PSMA1/PSMA3/PSMA5/PSMA7/PSMB8
REACTOME_FC_EPSILON_RECEPTOR_FCERI_SIGNALING	REACTOME_FC_EPSILON_RECEPTOR_FCERI_SIGNALING	21	-0.669792	-1.53564	0.0139755	0.565952	0.557539	129	tags=67%, list=18%, signal=57%	UBC/IGHE/PSMA6/PSMB5/PSMB3/PSMA2/PSMA4/PSMB4/PSMB9/PSMA1/PSMA3/PSMA5/PSMA7/PSMB8
GOBP_KERATAN_SULFATE_BIOSYNTHETIC_PROCESS	GOBP_KERATAN_SULFATE_BIOSYNTHETIC_PROCESS	3	-0.935092	-1.39567	0.0139759	0.565952	0.557539	50	tags=67%, list=7%, signal=62%	OGN/B4GALT1
GOBP_KERATAN_SULFATE_METABOLIC_PROCESS	GOBP_KERATAN_SULFATE_METABOLIC_PROCESS	3	-0.935092	-1.39567	0.0139759	0.565952	0.557539	50	tags=67%, list=7%, signal=62%	OGN/B4GALT1
REACTOME_DEFECTIVE_B4GALT1_CAUSES_B4GALT1_CDG_CDG_2D	REACTOME_DEFECTIVE_B4GALT1_CAUSES_B4GALT1_CDG_CDG_2D	3	-0.935092	-1.39567	0.0139759	0.565952	0.557539	50	tags=67%, list=7%, signal=62%	OGN/B4GALT1
REACTOME_KERATAN_SULFATE_BIOSYNTHESIS	REACTOME_KERATAN_SULFATE_BIOSYNTHESIS	3	-0.935092	-1.39567	0.0139759	0.565952	0.557539	50	tags=67%, list=7%, signal=62%	OGN/B4GALT1
REACTOME_KERATAN_SULFATE_KERATIN_METABOLISM	REACTOME_KERATAN_SULFATE_KERATIN_METABOLISM	3	-0.935092	-1.39567	0.0139759	0.565952	0.557539	50	tags=67%, list=7%, signal=62%	OGN/B4GALT1
GOZGIT_ESR1_TARGETS_DN	GOZGIT_ESR1_TARGETS_DN	42	-0.562174	-1.42837	0.0140022	0.565952	0.557539	173	tags=31%, list=24%, signal=25%	COL18A1/PSG4/NRP1/IGFBP4/PSG9/PSG3/FTH1/LCN2/MYO5A/PTGR1/TIMP1/PSMB8/SELENBP1
GOBP_GLIAL_CELL_DEVELOPMENT	GOBP_GLIAL_CELL_DEVELOPMENT	8	-0.810763	-1.5265	0.0140033	0.565952	0.557539	35	tags=38%, list=5%, signal=36%	DAG1/S100A8/S100A9
GSE36527_CD69_NEG_VS_POS_TREG_CD62L_LOS_KLRG1_NEG_UP	GSE36527_CD69_NEG_VS_POS_TREG_CD62L_LOS_KLRG1_NEG_UP	6	-0.857386	-1.50953	0.014018	0.565952	0.557539	59	tags=67%, list=8%, signal=62%	GP9/PSMB9/ICAM1/PSMB8
GOBP_COMPLEMENT_ACTIVATION_ALTERNATIVE_PATHWAY	GOBP_COMPLEMENT_ACTIVATION_ALTERNATIVE_PATHWAY	13	-0.74436	-1.5711	0.0140391	0.565952	0.557539	26	tags=38%, list=4%, signal=38%	CFHR5/C9/C5/C7/VSIG4
GSE43863_TH1_VS_LY6C_INT_CXCR5POS_EFFECTOR_CD4_TCELL_UP	GSE43863_TH1_VS_LY6C_INT_CXCR5POS_EFFECTOR_CD4_TCELL_UP	15	-0.724809	-1.55087	0.0141609	0.565952	0.557539	120	tags=53%, list=16%, signal=46%	PSMA2/GPI/PSMA4/TKT/HINT1/CHGA/DDT/NUCB1
GSE21063_CTRL_VS_ANTI_IGM_STIM_BCELL_NFATC1_KO_3H_UP	GSE21063_CTRL_VS_ANTI_IGM_STIM_BCELL_NFATC1_KO_3H_UP	17	-0.693658	-1.51888	0.0142533	0.565952	0.557539	101	tags=35%, list=14%, signal=31%	PAPPA/LCN2/LTF/S100A8/SERPINB1/S100A9
GSE29618_BCELL_VS_MONOCYTE_DN	GSE29618_BCELL_VS_MONOCYTE_DN	21	-0.669321	-1.53456	0.0143776	0.565952	0.557539	36	tags=24%, list=5%, signal=23%	FTL/CD93/LTA4H/PTX3/TIMP1
GOCC_TRANSPORT_VESICLE_MEMBRANE	GOCC_TRANSPORT_VESICLE_MEMBRANE	8	0.801077	1.65188	0.0145121	0.565952	0.557539	103	tags=62%, list=14%, signal=54%	CD59/HLA-C/CLTC/RAB27B/DBH
NABA_MATRISOME_ASSOCIATED	NABA_MATRISOME_ASSOCIATED	78	-0.499008	-1.39216	0.0145357	0.565952	0.557539	88	tags=17%, list=12%, signal=16%	COLEC10/FSTL1/CTSD/SDC1/REG1A/LGALS1/MMP9/TIMP1/S100A8/ELANE/CSH2/SERPINB1/S100A9
GOBP_TISSUE_MORPHOGENESIS	GOBP_TISSUE_MORPHOGENESIS	37	-0.582629	-1.46422	0.0145425	0.565952	0.557539	188	tags=54%, list=26%, signal=42%	PSMA6/MTHFD1/ACTG1/PSMB5/NRP1/VASP/KRT16/PSMB3/PSMA2/PSMA4/PSMB4/CSF1R/TNC/PSMB9/PSMA1/PSMA3/DAG1/PSMA5/PSMA7/PSMB8
WONG_PROTEASOME_GENE_MODULE	WONG_PROTEASOME_GENE_MODULE	7	-0.834019	-1.50219	0.0146601	0.565952	0.557539	129	tags=100%, list=18%, signal=83%	PSMA4/PSMB4/PSMA1/PSMA5/PSMA7/PSMB8
GAZDA_DIAMOND_BLACKFAN_ANEMIA_ERYTHROID_DN	GAZDA_DIAMOND_BLACKFAN_ANEMIA_ERYTHROID_DN	23	-0.649997	-1.51888	0.0147075	0.565952	0.557539	148	tags=43%, list=20%, signal=36%	PSG9/MMRN1/HNRNPM/REG3A/LCN2/ACTR2/LGALS1/MPO/PRG2/ELANE
GOBP_POSITIVE_REGULATION_OF_RESPONSE_TO_BIOTIC_STIMULUS	GOBP_POSITIVE_REGULATION_OF_RESPONSE_TO_BIOTIC_STIMULUS	23	-0.650036	-1.51898	0.0147075	0.565952	0.557539	129	tags=48%, list=18%, signal=41%	PSMB3/PSMA2/PSMA4/PSMB4/PSMB9/PSMA1/DHX9/PSMA3/PSMA5/PSMA7/PSMB8
GOBP_EXTERNAL_ENCAPSULATING_STRUCTURE_ORGANIZATION	GOBP_EXTERNAL_ENCAPSULATING_STRUCTURE_ORGANIZATION	52	-0.546823	-1.43791	0.014741	0.565952	0.557539	67	tags=21%, list=9%, signal=21%	TNC/SPP1/FBLN5/DAG1/ICAM1/MMP9/PTX3/TIMP1/ELANE/B4GALT1/COL6A1
GSE17721_0.5H_VS_12H_CPG_BMDC_UP	GSE17721_0.5H_VS_12H_CPG_BMDC_UP	12	-0.739134	-1.52768	0.0147424	0.565952	0.557539	112	tags=67%, list=15%, signal=57%	RNASE4/MDH1/SORD/GOT2/CORO1A/LGALS1/MRC1/SELENBP1
CHIANG_LIVER_CANCER_SUBCLASS_POLYSOMY7_DN	CHIANG_LIVER_CANCER_SUBCLASS_POLYSOMY7_DN	1	-0.991837	-1.31251	0.0147551	0.565952	0.557539	8	tags=100%, list=1%, signal=99%
CLAUS_PGR_POSITIVE_MENINGIOMA_UP	CLAUS_PGR_POSITIVE_MENINGIOMA_UP	1	-0.991837	-1.31251	0.0147551	0.565952	0.557539	8	tags=100%, list=1%, signal=99%
PARK_OSTEOBLAST_DIFFERENTIATION_BY_PHENYLAMIL_DN	PARK_OSTEOBLAST_DIFFERENTIATION_BY_PHENYLAMIL_DN	1	-0.991837	-1.31251	0.0147551	0.565952	0.557539	8	tags=100%, list=1%, signal=99%
TARTE_PLASMA_CELL_VS_B_LYMPHOCYTE_DN	TARTE_PLASMA_CELL_VS_B_LYMPHOCYTE_DN	1	-0.991837	-1.31251	0.0147551	0.565952	0.557539	8	tags=100%, list=1%, signal=99%
TSAI_DNAJB4_TARGETS_UP	TSAI_DNAJB4_TARGETS_UP	1	-0.991837	-1.31251	0.0147551	0.565952	0.557539	8	tags=100%, list=1%, signal=99%
GOBP_GLUCOCORTICOID_METABOLIC_PROCESS	GOBP_GLUCOCORTICOID_METABOLIC_PROCESS	3	0.952215	1.48852	0.0147691	0.565952	0.557539	17	tags=33%, list=2%, signal=33%	YWHAH
GOBP_BONE_GROWTH	GOBP_BONE_GROWTH	3	-0.933915	-1.39392	0.0147745	0.565952	0.557539	17	tags=67%, list=2%, signal=65%	COMP/TSKU
GOBP_CHONDROCYTE_DEVELOPMENT	GOBP_CHONDROCYTE_DEVELOPMENT	3	-0.933915	-1.39392	0.0147745	0.565952	0.557539	17	tags=67%, list=2%, signal=65%	COMP/TSKU
GOBP_RENAL_FILTRATION	GOBP_RENAL_FILTRATION	3	-0.933979	-1.39401	0.0147745	0.565952	0.557539	51	tags=67%, list=7%, signal=62%	MCAM/IGHA2
HP_ALZHEIMER_DISEASE	HP_ALZHEIMER_DISEASE	3	-0.934092	-1.39418	0.0147745	0.565952	0.557539	27	tags=67%, list=4%, signal=64%	A2M/MPO
HP_LONG_TRACT_SIGNS	HP_LONG_TRACT_SIGNS	3	-0.934092	-1.39418	0.0147745	0.565952	0.557539	27	tags=67%, list=4%, signal=64%	A2M/MPO
HP_NEUROFIBRILLARY_TANGLES	HP_NEUROFIBRILLARY_TANGLES	3	-0.934092	-1.39418	0.0147745	0.565952	0.557539	27	tags=67%, list=4%, signal=64%	A2M/MPO
LEE_AGING_MUSCLE_DN	LEE_AGING_MUSCLE_DN	3	-0.934013	-1.39406	0.0147745	0.565952	0.557539	39	tags=67%, list=5%, signal=63%	PRKCSH/PSMB8
GOBP_ORGANIC_HYDROXY_COMPOUND_TRANSPORT	GOBP_ORGANIC_HYDROXY_COMPOUND_TRANSPORT	27	-0.627603	-1.49569	0.0148018	0.565952	0.557539	141	tags=30%, list=19%, signal=25%	PCSK9/LIPC/CES1/SNCA/CHGA/SPP1/APOA5/TSKU
GOBP_REGULATION_OF_DNA_BINDING_TRANSCRIPTION_FACTOR_ACTIVITY	GOBP_REGULATION_OF_DNA_BINDING_TRANSCRIPTION_FACTOR_ACTIVITY	17	-0.691714	-1.51463	0.0148775	0.566125	0.55771	60	tags=53%, list=8%, signal=50%	UBC/PSMA6/HSPA1B/NPM1/LTF/DHX9/ICAM1/S100A8/S100A9
GSE360_L_DONOVANI_VS_T_GONDII_DC_UP	GSE360_L_DONOVANI_VS_T_GONDII_DC_UP	8	-0.806468	-1.51842	0.0149608	0.566125	0.55771	25	tags=25%, list=3%, signal=24%	C1S/MMP9
CHEN_HOXA5_TARGETS_9HR_DN	CHEN_HOXA5_TARGETS_9HR_DN	2	-0.973088	-1.35232	0.0149609	0.566125	0.55771	20	tags=100%, list=3%, signal=98%	DDT
GOBP_MYELOID_LEUKOCYTE_MEDIATED_IMMUNITY	GOBP_MYELOID_LEUKOCYTE_MEDIATED_IMMUNITY	97	-0.48337	-1.38477	0.0149939	0.566125	0.55771	157	tags=31%, list=21%, signal=28%	PTGDS/VNN1/HSPA1B/HSP90AB1/PRTN3/KRT1/PSMA2/FTH1/PYGL/GPI/LCN2/ACTR2/CTSD/CHGA/LTF/GDI2/FTL/CD93/LTA4H/MPO/MMP9/PRG2/PTX3/PSMA5/S100A8/ELANE/B4GALT1/SERPINB1/CHI3L1/S100A9
GROSS_HYPOXIA_VIA_ELK3_DN	GROSS_HYPOXIA_VIA_ELK3_DN	15	-0.722872	-1.54672	0.0150256	0.566125	0.55771	132	tags=33%, list=18%, signal=28%	GBE1/SRGN/TNC/CD93/S100A8
GOCC_COLLAGEN_CONTAINING_EXTRACELLULAR_MATRIX	GOCC_COLLAGEN_CONTAINING_EXTRACELLULAR_MATRIX	109	-0.481169	-1.39448	0.0150912	0.566125	0.55771	74	tags=15%, list=10%, signal=15%	CTSD/TNC/OGN/FBLN5/DAG1/LGALS1/ICAM1/MMP9/PRG2/TIMP1/SPARCL1/S100A8/ELANE/SERPINB1/COL6A1/S100A9
GOCC_F_ACTIN_CAPPING_PROTEIN_COMPLEX	GOCC_F_ACTIN_CAPPING_PROTEIN_COMPLEX	1	0.993197	1.3106	0.0151128	0.566125	0.55771	6	tags=100%, list=1%, signal=99%	CAPZA1
GOCC_WASH_COMPLEX	GOCC_WASH_COMPLEX	1	0.993197	1.3106	0.0151128	0.566125	0.55771	6	tags=100%, list=1%, signal=99%	CAPZA1
KYNG_RESPONSE_TO_H2O2_VIA_ERCC6_UP	KYNG_RESPONSE_TO_H2O2_VIA_ERCC6_UP	1	0.993197	1.3106	0.0151128	0.566125	0.55771	6	tags=100%, list=1%, signal=99%	CAPZA1
GSE22611_NOD2_TRANSD_VS_CTRL_TRANSD_HEK293_MDP_STIM_6H_DN	GSE22611_NOD2_TRANSD_VS_CTRL_TRANSD_HEK293_MDP_STIM_6H_DN	8	-0.805583	-1.51675	0.0152002	0.566125	0.55771	33	tags=38%, list=4%, signal=36%	FCGR2A/CD93/B4GALT1
REACTOME_TOLL_LIKE_RECEPTOR_TLR1_TLR2_CASCADE	REACTOME_TOLL_LIKE_RECEPTOR_TLR1_TLR2_CASCADE	8	-0.805468	-1.51654	0.0152002	0.566125	0.55771	16	tags=50%, list=2%, signal=49%	UBC/SAA1/S100A8/S100A9
ODONNELL_TARGETS_OF_MYC_AND_TFRC_UP	ODONNELL_TARGETS_OF_MYC_AND_TFRC_UP	6	0.8488	1.60733	0.0152044	0.566125	0.55771	70	tags=33%, list=10%, signal=30%	AK1/SLC2A3
GSE360_CTRL_VS_L_MAJOR_DC_DN	GSE360_CTRL_VS_L_MAJOR_DC_DN	15	-0.722721	-1.5464	0.0152418	0.566125	0.55771	123	tags=53%, list=17%, signal=45%	KRT85/PEBP1/TYMP/KRT86/PSMB9/FBLN5/MMP9/TIMP1
REACTOME_PTEN_REGULATION	REACTOME_PTEN_REGULATION	15	-0.722733	-1.54643	0.0152418	0.566125	0.55771	129	tags=93%, list=18%, signal=79%	RBBP7/UBC/PSMA6/PSMB5/PSMB3/PSMA2/PSMA4/PSMB4/PSMB9/PSMA1/PSMA3/PSMA5/PSMA7/PSMB8
SMID_BREAST_CANCER_ERBB2_UP	SMID_BREAST_CANCER_ERBB2_UP	20	-0.68263	-1.55299	0.0153418	0.568677	0.560224	62	tags=20%, list=8%, signal=19%	IGKV1D-13/TSKU/S100A8/S100A9
NAKAYA_PBMC_FLUARIX_FLUVIRIN_AGE_18_50YO_CORRELATED_WITH_HAI_28DY_RESPONSE_AT_7DY_NEGATIVE	NAKAYA_PBMC_FLUARIX_FLUVIRIN_AGE_18_50YO_CORRELATED_WITH_HAI_28DY_RESPONSE_AT_7DY_NEGATIVE	10	-0.783427	-1.55201	0.0154107	0.570072	0.561598	122	tags=50%, list=17%, signal=42%	HNRNPM/HNRNPA1/HINT1/DHX9/B4GALT1
REACTOME_SIGNALING_BY_HEDGEHOG	REACTOME_SIGNALING_BY_HEDGEHOG	20	-0.681425	-1.55025	0.0155423	0.572208	0.563703	129	tags=70%, list=18%, signal=59%	UBC/PSMA6/P4HB/PSMB5/PSMB3/PSMA2/PSMA4/PSMB4/PSMB9/PSMA1/PSMA3/PSMA5/PSMA7/PSMB8
GSE19401_NAIVE_VS_IMMUNIZED_MOUSE_PLN_FOLLICULAR_DC_UP	GSE19401_NAIVE_VS_IMMUNIZED_MOUSE_PLN_FOLLICULAR_DC_UP	24	-0.655047	-1.54313	0.0155801	0.572208	0.563703	84	tags=50%, list=11%, signal=46%	CBR3/HSP90AB1/HNRNPA3/CLIC1/HINT1/GDI2/CD163/LGALS1/ICAM1/S100A8/MRC1/S100A9
REACTOME_GENE_AND_PROTEIN_EXPRESSION_BY_JAK_STAT_SIGNALING_AFTER_INTERLEUKIN_12_STIMULATION	REACTOME_GENE_AND_PROTEIN_EXPRESSION_BY_JAK_STAT_SIGNALING_AFTER_INTERLEUKIN_12_STIMULATION	14	0.673043	1.63704	0.0155997	0.572208	0.563703	85	tags=36%, list=12%, signal=32%	CAPZA1/CNN2/HNRNPA2B1/HNRNPF/MSN
YAO_TEMPORAL_RESPONSE_TO_PROGESTERONE_CLUSTER_6	YAO_TEMPORAL_RESPONSE_TO_PROGESTERONE_CLUSTER_6	8	-0.804827	-1.51533	0.0156789	0.572208	0.563703	60	tags=38%, list=8%, signal=35%	RETN/LTF/CA3
PID_P75_NTR_PATHWAY	PID_P75_NTR_PATHWAY	4	0.914301	1.5256	0.0157042	0.572208	0.563703	47	tags=75%, list=6%, signal=71%	ARHGDIA/YWHAE/RAC1
GOBP_POSITIVE_REGULATION_OF_INFLAMMATORY_RESPONSE	GOBP_POSITIVE_REGULATION_OF_INFLAMMATORY_RESPONSE	13	-0.741643	-1.56537	0.0157538	0.572208	0.563703	76	tags=54%, list=10%, signal=49%	SNCA/DHX9/IL1RL1/PLA2G2A/DDT/S100A8/S100A9
GSE7509_UNSTIM_VS_IFNA_STIM_IMMATURE_DC_DN	GSE7509_UNSTIM_VS_IFNA_STIM_IMMATURE_DC_DN	6	-0.851738	-1.49958	0.0157547	0.572208	0.563703	90	tags=67%, list=12%, signal=59%	CORO1A/PSMB9/ICAM1/PSMB8
GOBP_REGULATION_OF_CALCIUM_MEDIATED_SIGNALING	GOBP_REGULATION_OF_CALCIUM_MEDIATED_SIGNALING	3	0.95068	1.48613	0.0157818	0.572208	0.563703	12	tags=67%, list=2%, signal=66%	CDH13/PTBP1
GOBP_ESTABLISHMENT_OF_PROTEIN_LOCALIZATION_TO_ORGANELLE	GOBP_ESTABLISHMENT_OF_PROTEIN_LOCALIZATION_TO_ORGANELLE	41	0.468772	1.49563	0.015784	0.572208	0.563703	107	tags=29%, list=15%, signal=26%	RPLP2/YWHAH/RAB11A/CCT2/CCT6A/YWHAE/AIFM1/RPS6/RPS23/RPS12/KPNA2/RPL9
GSE41176_UNSTIM_VS_ANTI_IGM_STIM_TAK1_KO_BCELL_24H_DN	GSE41176_UNSTIM_VS_ANTI_IGM_STIM_TAK1_KO_BCELL_24H_DN	12	-0.73787	-1.52507	0.0158344	0.572208	0.563703	58	tags=58%, list=8%, signal=55%	VCAN/MT1X/CSRP1/PTX3/S100A8/CHI3L1/S100A9
GOBP_GASTRULATION	GOBP_GASTRULATION	10	-0.781671	-1.54853	0.0158607	0.572208	0.563703	35	tags=30%, list=5%, signal=29%	DAG1/MMP9/COL6A1
GSE11961_MARGINAL_ZONE_BCELL_VS_MEMORY_BCELL_DAY40_DN	GSE11961_MARGINAL_ZONE_BCELL_VS_MEMORY_BCELL_DAY40_DN	7	-0.829704	-1.49441	0.0159131	0.572208	0.563703	79	tags=57%, list=11%, signal=51%	HINT1/SPP1/LGALS1/NUCB1
TAVOR_CEBPA_TARGETS_UP	TAVOR_CEBPA_TARGETS_UP	7	-0.829871	-1.49471	0.0159131	0.572208	0.563703	22	tags=43%, list=3%, signal=42%	SOD2/PTX3/S100A9
GOBP_CELL_SURFACE_RECEPTOR_SIGNALING_PATHWAY_INVOLVED_IN_CELL_CELL_SIGNALING	GOBP_CELL_SURFACE_RECEPTOR_SIGNALING_PATHWAY_INVOLVED_IN_CELL_CELL_SIGNALING	25	-0.639384	-1.51331	0.0159178	0.572208	0.563703	129	tags=56%, list=18%, signal=48%	PSMB3/PSMA2/PSMA4/PSMB4/IGFBP2/SDC1/PSMB9/PSMA1/IGFBP1/PSMA3/PSMA5/TSKU/PSMA7/PSMB8
REACTOME_DEUBIQUITINATION	REACTOME_DEUBIQUITINATION	16	-0.692415	-1.51114	0.0159401	0.572208	0.563703	129	tags=62%, list=18%, signal=53%	PSMB3/PSMA2/PSMA4/PSMB4/PSMB9/PSMA1/PSMA3/PSMA5/PSMA7/PSMB8
BIOCARTA_AKT_PATHWAY	BIOCARTA_AKT_PATHWAY	2	0.971205	1.38382	0.0160436	0.5738	0.565271	17	tags=50%, list=2%, signal=49%	YWHAH
GOBP_POSITIVE_REGULATION_OF_TRIGLYCERIDE_LIPASE_ACTIVITY	GOBP_POSITIVE_REGULATION_OF_TRIGLYCERIDE_LIPASE_ACTIVITY	4	-0.919515	-1.47957	0.0160475	0.5738	0.565271	42	tags=75%, list=6%, signal=71%	APOH/APOA4/APOA5
MORI_MATURE_B_LYMPHOCYTE_DN	MORI_MATURE_B_LYMPHOCYTE_DN	3	-0.931787	-1.39074	0.0161055	0.573867	0.565337	54	tags=100%, list=7%, signal=93%	PTGR1/CD93
CHIARETTI_T_ALL_REFRACTORY_TO_THERAPY	CHIARETTI_T_ALL_REFRACTORY_TO_THERAPY	3	0.950243	1.48544	0.0161194	0.573867	0.565337	24	tags=33%, list=3%, signal=32%	FHL1
DARWICHE_PAPILLOMA_RISK_LOW_UP	DARWICHE_PAPILLOMA_RISK_LOW_UP	20	-0.680638	-1.54846	0.016144	0.573867	0.565337	54	tags=35%, list=7%, signal=33%	TXN/MCAM/FTL/S100A8/CA3/CHI3L1/S100A9
REACTOME_NUCLEAR_SIGNALING_BY_ERBB4	REACTOME_NUCLEAR_SIGNALING_BY_ERBB4	2	0.970603	1.38297	0.0162065	0.574968	0.566422	21	tags=50%, list=3%, signal=49%	SPARC
GSE25677_MPL_VS_MPL_AND_R848_STIM_BCELL_DN	GSE25677_MPL_VS_MPL_AND_R848_STIM_BCELL_DN	6	-0.850817	-1.49796	0.0162509	0.575422	0.566869	55	tags=33%, list=7%, signal=31%	EFEMP1/SPP1
GOBP_GLIAL_CELL_DIFFERENTIATION	GOBP_GLIAL_CELL_DIFFERENTIATION	10	-0.779249	-1.54374	0.0163106	0.576414	0.567846	35	tags=30%, list=5%, signal=29%	DAG1/S100A8/S100A9
GOBP_CELLULAR_RESPONSE_TO_NITROGEN_COMPOUND	GOBP_CELLULAR_RESPONSE_TO_NITROGEN_COMPOUND	34	-0.598456	-1.49009	0.0163603	0.577051	0.568473	151	tags=41%, list=21%, signal=34%	CDH1/NPM1/CPS1/YWHAG/ACTR2/PKLR/SNCA/MYO5A/REG1A/DHX9/IGFBP1/ICAM1/CSH2/COL6A1
GSE37534_UNTREATED_VS_ROSIGLITAZONE_TREATED_CD4_TCELL_PPARG1_AND_FOXP3_TRASDUCED_DN	GSE37534_UNTREATED_VS_ROSIGLITAZONE_TREATED_CD4_TCELL_PPARG1_AND_FOXP3_TRASDUCED_DN	6	-0.849735	-1.49605	0.016499	0.579218	0.570608	69	tags=67%, list=9%, signal=61%	BPGM/PSMB9/ICAM1/PSMB8
HOOI_ST7_TARGETS_UP	HOOI_ST7_TARGETS_UP	2	0.970027	1.38215	0.0165323	0.579218	0.570608	24	tags=100%, list=3%, signal=97%	SERPINE1/FHL1
GSE15330_HSC_VS_LYMPHOID_PRIMED_MULTIPOTENT_PROGENITOR_DN	GSE15330_HSC_VS_LYMPHOID_PRIMED_MULTIPOTENT_PROGENITOR_DN	10	-0.778579	-1.54241	0.0165356	0.579218	0.570608	74	tags=40%, list=10%, signal=36%	CTSD/MYO5A/PTGR1/S100A8
HP_COLITIS	HP_COLITIS	4	-0.917476	-1.47629	0.0165529	0.579218	0.570608	15	tags=50%, list=2%, signal=49%	MST1/ELANE
GOBP_PEPTIDYL_CYSTEINE_MODIFICATION	GOBP_PEPTIDYL_CYSTEINE_MODIFICATION	5	-0.892013	-1.50891	0.0165809	0.579218	0.570608	54	tags=60%, list=7%, signal=56%	TXN/S100A8/S100A9
HP_PERITONITIS	HP_PERITONITIS	3	-0.931468	-1.39026	0.0166379	0.580096	0.571473	15	tags=67%, list=2%, signal=66%	F5/ELANE
GSE18893_TCONV_VS_TREG_24H_TNF_STIM_DN	GSE18893_TCONV_VS_TREG_24H_TNF_STIM_DN	9	0.783259	1.67845	0.0168048	0.583706	0.57503	82	tags=44%, list=11%, signal=40%	CNN2/ALDOB/ENO3/RSU1
GSE27786_LIN_NEG_VS_BCELL_DN	GSE27786_LIN_NEG_VS_BCELL_DN	4	-0.916577	-1.47484	0.0168056	0.583706	0.57503	59	tags=75%, list=8%, signal=69%	PSMB9/ICAM1/PSMA5
SMID_BREAST_CANCER_RELAPSE_IN_LIVER_UP	SMID_BREAST_CANCER_RELAPSE_IN_LIVER_UP	2	-0.970274	-1.34841	0.0168824	0.585256	0.576557	16	tags=100%, list=2%, signal=98%	S100A8
GOBP_MACROPHAGE_ACTIVATION	GOBP_MACROPHAGE_ACTIVATION	9	-0.814775	-1.57217	0.0169213	0.585335	0.576634	76	tags=44%, list=10%, signal=40%	SNCA/IL1RL1/CD93/VSIG4
GSE37301_LYMPHOID_PRIMED_MPP_VS_CD4_TCELL_UP	GSE37301_LYMPHOID_PRIMED_MPP_VS_CD4_TCELL_UP	8	-0.800706	-1.50757	0.0171151	0.585335	0.576634	15	tags=25%, list=2%, signal=25%	ELANE/CSH2
GOMF_MOLECULAR_TRANSDUCER_ACTIVITY	GOMF_MOLECULAR_TRANSDUCER_ACTIVITY	24	-0.652044	-1.53605	0.0171284	0.585335	0.576634	133	tags=38%, list=18%, signal=32%	NRP1/KRT1/REG3A/CSF1R/REG1A/IL1RL1/CD93/ICAM1/MRC1
BLALOCK_ALZHEIMERS_DISEASE_INCIPIENT_DN	BLALOCK_ALZHEIMERS_DISEASE_INCIPIENT_DN	11	0.733252	1.64233	0.0171691	0.585335	0.576634	97	tags=45%, list=13%, signal=40%	CD59/FHL1/CCT2/RSU1/PDIA6
KEGG_N_GLYCAN_BIOSYNTHESIS	KEGG_N_GLYCAN_BIOSYNTHESIS	3	-0.930743	-1.38918	0.0171703	0.585335	0.576634	45	tags=67%, list=6%, signal=63%	GANAB/B4GALT1
CHEBOTAEV_GR_TARGETS_DN	CHEBOTAEV_GR_TARGETS_DN	7	0.841774	1.68671	0.0171846	0.585335	0.576634	45	tags=29%, list=6%, signal=27%	CNN2/TUBA8
DIAZ_CHRONIC_MEYLOGENOUS_LEUKEMIA_DN	DIAZ_CHRONIC_MEYLOGENOUS_LEUKEMIA_DN	15	-0.716723	-1.53357	0.0171876	0.585335	0.576634	27	tags=33%, list=4%, signal=33%	CSF1R/MPO/S100A8/ELANE/S100A9
REACTOME_DISEASES_OF_SIGNAL_TRANSDUCTION_BY_GROWTH_FACTOR_RECEPTORS_AND_SECOND_MESSENGERS	REACTOME_DISEASES_OF_SIGNAL_TRANSDUCTION_BY_GROWTH_FACTOR_RECEPTORS_AND_SECOND_MESSENGERS	31	-0.605944	-1.49116	0.0172189	0.585335	0.576634	200	tags=55%, list=27%, signal=42%	UBC/PSMA6/ACTG1/BIN2/PSMB5/YWHAB/PSMB3/PSMA2/PEBP1/PSMA4/PSMB4/PSMB9/PSMA1/PSMA3/PSMA5/PSMA7/PSMB8
GOBP_ANTIBACTERIAL_HUMORAL_RESPONSE	GOBP_ANTIBACTERIAL_HUMORAL_RESPONSE	13	-0.739595	-1.56105	0.0172541	0.585335	0.576634	126	tags=38%, list=17%, signal=32%	DEFA3/WFDC2/LTF/IGHA2/ELANE
BOYLAN_MULTIPLE_MYELOMA_D_CLUSTER_DN	BOYLAN_MULTIPLE_MYELOMA_D_CLUSTER_DN	5	-0.88957	-1.50478	0.0173403	0.585335	0.576634	66	tags=60%, list=9%, signal=55%	LASP1/CSRP1/LGALS1
GSE22935_UNSTIM_VS_48H_MBOVIS_BCG_STIM_MYD88_KO_MACROPHAGE_DN	GSE22935_UNSTIM_VS_48H_MBOVIS_BCG_STIM_MYD88_KO_MACROPHAGE_DN	8	-0.800611	-1.50739	0.0173545	0.585335	0.576634	53	tags=62%, list=7%, signal=59%	SERPINA11/FGL1/ACAA2/PLA2G2A/CHI3L1
HP_HEMOLYTIC_UREMIC_SYNDROME	HP_HEMOLYTIC_UREMIC_SYNDROME	7	0.841303	1.68576	0.0173684	0.585335	0.576634	2	tags=14%, list=0%, signal=14%	PRDX1
HP_ABNORMAL_DELIVERY	HP_ABNORMAL_DELIVERY	15	0.668815	1.68398	0.0174085	0.585335	0.576634	196	tags=47%, list=27%, signal=35%	SERPINE1/TPM2/MGP/ITGA2B/F13B/ITGB3/F13A1
BIOCARTA_RECK_PATHWAY	BIOCARTA_RECK_PATHWAY	2	-0.970027	-1.34806	0.0174314	0.585335	0.576634	25	tags=100%, list=3%, signal=97%	TIMP1
GOBP_CELLULAR_RESPONSE_TO_UV_A	GOBP_CELLULAR_RESPONSE_TO_UV_A	2	-0.970027	-1.34806	0.0174314	0.585335	0.576634	25	tags=100%, list=3%, signal=97%	TIMP1
GOBP_RESPONSE_TO_UV_A	GOBP_RESPONSE_TO_UV_A	2	-0.970027	-1.34806	0.0174314	0.585335	0.576634	25	tags=100%, list=3%, signal=97%	TIMP1
WP_MATRIX_METALLOPROTEINASES	WP_MATRIX_METALLOPROTEINASES	2	-0.970027	-1.34806	0.0174314	0.585335	0.576634	25	tags=100%, list=3%, signal=97%	TIMP1
GOBP_ENTRY_INTO_HOST	GOBP_ENTRY_INTO_HOST	19	-0.661475	-1.47966	0.0174985	0.585429	0.576727	35	tags=53%, list=5%, signal=51%	P4HB/NRP1/HSPA1B/CDH1/NCAM1/DAG1/LGALS1/ICAM1/PTX3/MRC1
GOBP_MOVEMENT_IN_HOST_ENVIRONMENT	GOBP_MOVEMENT_IN_HOST_ENVIRONMENT	19	-0.661475	-1.47966	0.0174985	0.585429	0.576727	35	tags=53%, list=5%, signal=51%	P4HB/NRP1/HSPA1B/CDH1/NCAM1/DAG1/LGALS1/ICAM1/PTX3/MRC1
GAUSSMANN_MLL_AF4_FUSION_TARGETS_F_UP	GAUSSMANN_MLL_AF4_FUSION_TARGETS_F_UP	10	-0.77754	-1.54035	0.0176604	0.585799	0.577092	50	tags=40%, list=7%, signal=38%	HNRNPA3/OGN/SERPINB1/COL6A1
ZHENG_BOUND_BY_FOXP3	ZHENG_BOUND_BY_FOXP3	17	-0.683686	-1.49705	0.0177906	0.585799	0.577092	76	tags=41%, list=10%, signal=38%	SNCA/ACTR3/PSMA1/SPP1/FBLN5/GDI2/LTA4H
GOBP_POSITIVE_REGULATION_OF_NF_KAPPAB_TRANSCRIPTION_FACTOR_ACTIVITY	GOBP_POSITIVE_REGULATION_OF_NF_KAPPAB_TRANSCRIPTION_FACTOR_ACTIVITY	14	-0.714155	-1.51829	0.0178715	0.585799	0.577092	60	tags=64%, list=8%, signal=60%	UBC/PSMA6/HSPA1B/NPM1/LTF/DHX9/ICAM1/S100A8/S100A9
MONNIER_POSTRADIATION_TUMOR_ESCAPE_DN	MONNIER_POSTRADIATION_TUMOR_ESCAPE_DN	20	-0.678019	-1.5425	0.0179489	0.585799	0.577092	136	tags=45%, list=18%, signal=38%	HNRNPA3/COL6A3/WFDC2/OAF/FSTL1/CLIC1/OGN/UGP2/COL6A1
GOBP_RESPONSE_TO_AMYLOID_BETA	GOBP_RESPONSE_TO_AMYLOID_BETA	3	-0.930068	-1.38817	0.0179689	0.585799	0.577092	28	tags=100%, list=4%, signal=97%	ICAM1/MMP9
WP_PHOTODYNAMIC_THERAPYINDUCED_NFKB_SURVIVAL_SIGNALING	WP_PHOTODYNAMIC_THERAPYINDUCED_NFKB_SURVIVAL_SIGNALING	3	-0.930068	-1.38817	0.0179689	0.585799	0.577092	28	tags=100%, list=4%, signal=97%	ICAM1/MMP9
MCBRYAN_PUBERTAL_BREAST_4_5WK_UP	MCBRYAN_PUBERTAL_BREAST_4_5WK_UP	25	-0.634182	-1.501	0.0180661	0.585799	0.577092	159	tags=52%, list=22%, signal=42%	VCAN/HSPA1B/CDH1/WFDC2/LCN2/IGFBP2/TNC/SDC1/LTF/SPP1/PTX3/TIMP1/CHI3L1
GOCC_GOLGI_STACK	GOCC_GOLGI_STACK	4	-0.914947	-1.47222	0.0180692	0.585799	0.577092	11	tags=50%, list=1%, signal=50%	B4GALT1/NUCB1
GSE37301_MULTIPOTENT_PROGENITOR_VS_GRAN_MONO_PROGENITOR_UP	GSE37301_MULTIPOTENT_PROGENITOR_VS_GRAN_MONO_PROGENITOR_UP	9	-0.810891	-1.56467	0.0180883	0.585799	0.577092	42	tags=33%, list=6%, signal=32%	SOD2/APOA5/PSMB8
GSE14415_NATURAL_TREG_VS_TCONV_UP	GSE14415_NATURAL_TREG_VS_TCONV_UP	5	-0.888489	-1.50295	0.0180997	0.585799	0.577092	43	tags=40%, list=6%, signal=38%	IL1RL1/NUCB1
YAO_TEMPORAL_RESPONSE_TO_PROGESTERONE_CLUSTER_9	YAO_TEMPORAL_RESPONSE_TO_PROGESTERONE_CLUSTER_9	4	-0.913847	-1.47045	0.0183219	0.585799	0.577092	59	tags=50%, list=8%, signal=46%	PSMB9/PSMB8
HP_BILATERAL_TONIC_CLONIC_SEIZURE	HP_BILATERAL_TONIC_CLONIC_SEIZURE	5	0.86606	1.56432	0.0183826	0.585799	0.577092	100	tags=80%, list=14%, signal=70%	RAB11A/TUBA8/CLTC/HNRNPU
GOMF_CADHERIN_BINDING	GOMF_CADHERIN_BINDING	40	0.473563	1.49574	0.0184336	0.585799	0.577092	46	tags=18%, list=6%, signal=17%	PRDX1/CDH13/CAPZA1/CALD1/CNN2/EEF2/YWHAE
GOBP_PHYSIOLOGICAL_CARDIAC_MUSCLE_HYPERTROPHY	GOBP_PHYSIOLOGICAL_CARDIAC_MUSCLE_HYPERTROPHY	2	0.968444	1.37989	0.0184964	0.585799	0.577092	7	tags=50%, list=1%, signal=50%	PI16
GOBP_CELLULAR_PROTEIN_CATABOLIC_PROCESS	GOBP_CELLULAR_PROTEIN_CATABOLIC_PROCESS	33	-0.601117	-1.48789	0.018511	0.585799	0.577092	200	tags=55%, list=27%, signal=42%	UCHL1/XPO1/UBC/PSMA6/PCSK9/PSMB5/HSPA1B/HSP90AB1/PSMB3/PSMA2/PSMA4/PSMB4/PSMB9/PSMA1/PSMA3/PSMA5/PSMA7/PSMB8
GOBP_NEGATIVE_REGULATION_OF_CELL_GROWTH_INVOLVED_IN_CARDIAC_MUSCLE_CELL_DEVELOPMENT	GOBP_NEGATIVE_REGULATION_OF_CELL_GROWTH_INVOLVED_IN_CARDIAC_MUSCLE_CELL_DEVELOPMENT	1	0.991837	1.3088	0.0185877	0.585799	0.577092	7	tags=100%, list=1%, signal=99%	PI16
GOBP_NEGATIVE_REGULATION_OF_MUSCLE_HYPERTROPHY	GOBP_NEGATIVE_REGULATION_OF_MUSCLE_HYPERTROPHY	1	0.991837	1.3088	0.0185877	0.585799	0.577092	7	tags=100%, list=1%, signal=99%	PI16
GOBP_NEGATIVE_REGULATION_OF_STRIATED_MUSCLE_CELL_DIFFERENTIATION	GOBP_NEGATIVE_REGULATION_OF_STRIATED_MUSCLE_CELL_DIFFERENTIATION	1	0.991837	1.3088	0.0185877	0.585799	0.577092	7	tags=100%, list=1%, signal=99%	PI16
GOBP_REGULATION_OF_CELL_GROWTH_INVOLVED_IN_CARDIAC_MUSCLE_CELL_DEVELOPMENT	GOBP_REGULATION_OF_CELL_GROWTH_INVOLVED_IN_CARDIAC_MUSCLE_CELL_DEVELOPMENT	1	0.991837	1.3088	0.0185877	0.585799	0.577092	7	tags=100%, list=1%, signal=99%	PI16
GOBP_REGULATION_OF_STRIATED_MUSCLE_CELL_DIFFERENTIATION	GOBP_REGULATION_OF_STRIATED_MUSCLE_CELL_DIFFERENTIATION	1	0.991837	1.3088	0.0185877	0.585799	0.577092	7	tags=100%, list=1%, signal=99%	PI16
HOFT_CD4_POSITIVE_ALPHA_BETA_MEMORY_T_CELL_BCG_VACCINE_AGE_18_45YO_56D_TOP_100_DEG_AFTER_IN_VITRO_RE_STIMULATION_UP	HOFT_CD4_POSITIVE_ALPHA_BETA_MEMORY_T_CELL_BCG_VACCINE_AGE_18_45YO_56D_TOP_100_DEG_AFTER_IN_VITRO_RE_STIMULATION_UP	1	0.991837	1.3088	0.0185877	0.585799	0.577092	7	tags=100%, list=1%, signal=99%	PI16
HOFT_CD4_POSITIVE_ALPHA_BETA_MEMORY_T_CELL_BCG_VACCINE_AGE_18_45YO_ID_7DY_TOP_100_DEG_EX_VIVO_UP	HOFT_CD4_POSITIVE_ALPHA_BETA_MEMORY_T_CELL_BCG_VACCINE_AGE_18_45YO_ID_7DY_TOP_100_DEG_EX_VIVO_UP	1	0.991837	1.3088	0.0185877	0.585799	0.577092	7	tags=100%, list=1%, signal=99%	PI16
WANG_BARRETTS_ESOPHAGUS_AND_ESOPHAGUS_CANCER_UP	WANG_BARRETTS_ESOPHAGUS_AND_ESOPHAGUS_CANCER_UP	3	-0.928693	-1.38612	0.0187675	0.585799	0.577092	9	tags=67%, list=1%, signal=66%	AZGP1/PSMB8
GOBP_REGULATION_OF_ANIMAL_ORGAN_MORPHOGENESIS	GOBP_REGULATION_OF_ANIMAL_ORGAN_MORPHOGENESIS	16	-0.683308	-1.49127	0.0188572	0.585799	0.577092	129	tags=62%, list=18%, signal=53%	PSMB3/PSMA2/PSMA4/PSMB4/PSMB9/PSMA1/PSMA3/PSMA5/PSMA7/PSMB8
FEVR_CTNNB1_TARGETS_UP	FEVR_CTNNB1_TARGETS_UP	50	-0.551523	-1.44487	0.0189313	0.585799	0.577092	116	tags=32%, list=16%, signal=29%	SAA2/REG3A/TYMP/FABP1/CORO1A/CSF1R/PKLR/SPP1/CD163/IL1RL1/LGALS1/UGP2/S100A8/ELANE/CA3/SERPINB1
REACTOME_UB_SPECIFIC_PROCESSING_PROTEASES	REACTOME_UB_SPECIFIC_PROCESSING_PROTEASES	14	-0.710518	-1.51055	0.0189417	0.585799	0.577092	129	tags=71%, list=18%, signal=60%	PSMB3/PSMA2/PSMA4/PSMB4/PSMB9/PSMA1/PSMA3/PSMA5/PSMA7/PSMB8
JAATINEN_HEMATOPOIETIC_STEM_CELL_DN	JAATINEN_HEMATOPOIETIC_STEM_CELL_DN	34	-0.591472	-1.4727	0.0190082	0.585799	0.577092	76	tags=26%, list=10%, signal=25%	SNCA/BPGM/LTF/CD163/MMP9/S100A8/CHI3L1/S100A9/SELENBP1
SESTO_RESPONSE_TO_UV_C8	SESTO_RESPONSE_TO_UV_C8	7	0.836389	1.67592	0.0190243	0.585799	0.577092	74	tags=57%, list=10%, signal=52%	SERPINE1/FHL1/PGM1/PFKP
HP_PYELONEPHRITIS	HP_PYELONEPHRITIS	3	-0.928403	-1.38569	0.0190337	0.585799	0.577092	49	tags=100%, list=7%, signal=94%	FBLN5/GANAB
GOBP_INNER_EAR_RECEPTOR_CELL_DEVELOPMENT	GOBP_INNER_EAR_RECEPTOR_CELL_DEVELOPMENT	2	-0.966664	-1.34339	0.0190784	0.585799	0.577092	17	tags=100%, list=2%, signal=98%	TSKU
GOBP_INNER_EAR_RECEPTOR_CELL_STEREOCILIUM_ORGANIZATION	GOBP_INNER_EAR_RECEPTOR_CELL_STEREOCILIUM_ORGANIZATION	2	-0.966664	-1.34339	0.0190784	0.585799	0.577092	17	tags=100%, list=2%, signal=98%	TSKU
GOBP_MECHANORECEPTOR_DIFFERENTIATION	GOBP_MECHANORECEPTOR_DIFFERENTIATION	2	-0.966664	-1.34339	0.0190784	0.585799	0.577092	17	tags=100%, list=2%, signal=98%	TSKU
SWEET_KRAS_TARGETS_UP	SWEET_KRAS_TARGETS_UP	13	0.698663	1.63543	0.0192212	0.585799	0.577092	142	tags=46%, list=19%, signal=38%	SPARC/CALD1/SERPINE1/RSU1/HSPB1/TPM1
RUTELLA_RESPONSE_TO_CSF2RB_AND_IL4_DN	RUTELLA_RESPONSE_TO_CSF2RB_AND_IL4_DN	33	-0.599246	-1.48326	0.0192705	0.585799	0.577092	159	tags=55%, list=22%, signal=45%	FAH/SOD2/GSR/VCAN/PTGDS/VNN1/CES1/MT1X/TYMP/HNRNPA1/CTSD/ACAA2/NUP214/CD163/LTA4H/VSIG4/AMY1A/S100A9
GOBP_AMINOGLYCAN_METABOLIC_PROCESS	GOBP_AMINOGLYCAN_METABOLIC_PROCESS	15	-0.7136	-1.52689	0.0193495	0.585799	0.577092	65	tags=33%, list=9%, signal=31%	VCAN/SDC1/OGN/B4GALT1/CHI3L1
GOBP_NIK_NF_KAPPAB_SIGNALING	GOBP_NIK_NF_KAPPAB_SIGNALING	18	-0.677216	-1.49513	0.0193743	0.585799	0.577092	129	tags=61%, list=18%, signal=52%	PSMB3/PSMA2/PSMA4/PSMB4/PSMB9/PSMA1/PSMA3/PSMA5/PSMA7/PSMB8/CHI3L1
GSE14415_ACT_TCONV_VS_ACT_NATURAL_TREG_DN	GSE14415_ACT_TCONV_VS_ACT_NATURAL_TREG_DN	9	-0.808652	-1.56035	0.0194886	0.585799	0.577092	110	tags=56%, list=15%, signal=48%	SRGN/CLIC1/MYO5A/PTGR1/MPO
GOBP_NEGATIVE_REGULATION_OF_RESPONSE_TO_EXTERNAL_STIMULUS	GOBP_NEGATIVE_REGULATION_OF_RESPONSE_TO_EXTERNAL_STIMULUS	45	-0.551315	-1.41695	0.0195619	0.585799	0.577092	163	tags=24%, list=22%, signal=20%	NRP1/SEMA4B/SAA1/KRT1/PSMB4/LTF/PSMA1/SPP1/VSIG4/DDT/ELANE
GOMF_CYTOKINE_RECEPTOR_BINDING	GOMF_CYTOKINE_RECEPTOR_BINDING	9	-0.808198	-1.55947	0.019722	0.585799	0.577092	20	tags=33%, list=3%, signal=33%	LRG1/DDT/CSH2
HP_EPILEPTIC_SPASM	HP_EPILEPTIC_SPASM	7	0.833972	1.67108	0.0197631	0.585799	0.577092	91	tags=57%, list=12%, signal=51%	PSAT1/RAB11A/TUBA8/CLTC
HP_MOTOR_SEIZURE	HP_MOTOR_SEIZURE	7	0.833972	1.67108	0.0197631	0.585799	0.577092	91	tags=57%, list=12%, signal=51%	PSAT1/RAB11A/TUBA8/CLTC
GOCC_PEPTIDASE_COMPLEX	GOCC_PEPTIDASE_COMPLEX	14	-0.709304	-1.50797	0.0197978	0.585799	0.577092	129	tags=71%, list=18%, signal=60%	PSMB3/PSMA2/PSMA4/PSMB4/PSMB9/PSMA1/PSMA3/PSMA5/PSMA7/PSMB8
BUCKANOVICH_T_LYMPHOCYTE_HOMING_ON_TUMOR_UP	BUCKANOVICH_T_LYMPHOCYTE_HOMING_ON_TUMOR_UP	2	0.967633	1.37873	0.0198059	0.585799	0.577092	22	tags=50%, list=3%, signal=49%	CALD1
HAMAI_APOPTOSIS_VIA_TRAIL_DN	HAMAI_APOPTOSIS_VIA_TRAIL_DN	13	-0.734486	-1.55026	0.0198262	0.585799	0.577092	28	tags=38%, list=4%, signal=38%	VASP/TYMP/ICAM1/SERPINB1/COL6A1
GSE22886_IGG_IGA_MEMORY_BCELL_VS_BM_PLASMA_CELL_DN	GSE22886_IGG_IGA_MEMORY_BCELL_VS_BM_PLASMA_CELL_DN	9	-0.807169	-1.55749	0.0199554	0.585799	0.577092	65	tags=44%, list=9%, signal=41%	CST3/SDC1/IGKV1D-13/TIMP1
MCDOWELL_ACUTE_LUNG_INJURY_UP	MCDOWELL_ACUTE_LUNG_INJURY_UP	13	-0.73442	-1.55012	0.0200405	0.585799	0.577092	101	tags=46%, list=14%, signal=41%	LCN2/TNC/LTF/SPP1/PTX3/S100A8
GOBP_SENSORY_ORGAN_MORPHOGENESIS	GOBP_SENSORY_ORGAN_MORPHOGENESIS	4	-0.910752	-1.46547	0.0200909	0.585799	0.577092	17	tags=50%, list=2%, signal=49%	EFEMP1/TSKU
GOBP_INTESTINAL_LIPID_ABSORPTION	GOBP_INTESTINAL_LIPID_ABSORPTION	3	-0.927271	-1.384	0.0200985	0.585799	0.577092	42	tags=67%, list=6%, signal=63%	APOA4/APOA5
GOBP_LIPID_DIGESTION	GOBP_LIPID_DIGESTION	3	-0.927271	-1.384	0.0200985	0.585799	0.577092	42	tags=67%, list=6%, signal=63%	APOA4/APOA5
GOBP_N_GLYCAN_PROCESSING	GOBP_N_GLYCAN_PROCESSING	3	-0.927282	-1.38402	0.0200985	0.585799	0.577092	45	tags=100%, list=6%, signal=94%	GANAB/PRKCSH
GOBP_POSITIVE_REGULATION_OF_FATTY_ACID_BIOSYNTHETIC_PROCESS	GOBP_POSITIVE_REGULATION_OF_FATTY_ACID_BIOSYNTHETIC_PROCESS	3	-0.927271	-1.384	0.0200985	0.585799	0.577092	42	tags=67%, list=6%, signal=63%	APOA4/APOA5
GOBP_POSITIVE_REGULATION_OF_TRIGLYCERIDE_CATABOLIC_PROCESS	GOBP_POSITIVE_REGULATION_OF_TRIGLYCERIDE_CATABOLIC_PROCESS	3	-0.927271	-1.384	0.0200985	0.585799	0.577092	42	tags=67%, list=6%, signal=63%	APOA4/APOA5
GOBP_REGULATION_OF_INTESTINAL_ABSORPTION	GOBP_REGULATION_OF_INTESTINAL_ABSORPTION	3	-0.927271	-1.384	0.0200985	0.585799	0.577092	42	tags=67%, list=6%, signal=63%	APOA4/APOA5
GOBP_REGULATION_OF_INTESTINAL_CHOLESTEROL_ABSORPTION	GOBP_REGULATION_OF_INTESTINAL_CHOLESTEROL_ABSORPTION	3	-0.927271	-1.384	0.0200985	0.585799	0.577092	42	tags=67%, list=6%, signal=63%	APOA4/APOA5
SCHERER_PBMC_APSV_WETVAX_AGE_18_32YO_5_TO_7DY_UP	SCHERER_PBMC_APSV_WETVAX_AGE_18_32YO_5_TO_7DY_UP	27	-0.610327	-1.45452	0.0201662	0.585799	0.577092	129	tags=30%, list=18%, signal=25%	PSMB3/CES1/PSMA4/LAP3/PSMB9/CD163/ICAM1/S100A9
GOBP_POSITIVE_REGULATION_OF_LEUKOCYTE_ADHESION_TO_VASCULAR_ENDOTHELIAL_CELL	GOBP_POSITIVE_REGULATION_OF_LEUKOCYTE_ADHESION_TO_VASCULAR_ENDOTHELIAL_CELL	2	-0.96594	-1.34238	0.0201764	0.585799	0.577092	28	tags=100%, list=4%, signal=96%	ELANE
GOBP_REGULATION_OF_CELLULAR_EXTRAVASATION	GOBP_REGULATION_OF_CELLULAR_EXTRAVASATION	2	-0.96594	-1.34238	0.0201764	0.585799	0.577092	28	tags=100%, list=4%, signal=96%	ELANE
GOBP_REGULATION_OF_LEUKOCYTE_ADHESION_TO_VASCULAR_ENDOTHELIAL_CELL	GOBP_REGULATION_OF_LEUKOCYTE_ADHESION_TO_VASCULAR_ENDOTHELIAL_CELL	2	-0.96594	-1.34238	0.0201764	0.585799	0.577092	28	tags=100%, list=4%, signal=96%	ELANE
REACTOME_INTERLEUKIN_10_SIGNALING	REACTOME_INTERLEUKIN_10_SIGNALING	2	-0.96594	-1.34238	0.0201764	0.585799	0.577092	28	tags=100%, list=4%, signal=96%	TIMP1
GSE2197_IMMUNOSUPPRESSIVE_DNA_VS_UNTREATED_IN_DC_UP	GSE2197_IMMUNOSUPPRESSIVE_DNA_VS_UNTREATED_IN_DC_UP	9	-0.806804	-1.55678	0.0201888	0.585799	0.577092	58	tags=33%, list=8%, signal=31%	CSRP1/TXN/ICAM1
HP_ABNORMALITY_OF_FACIAL_ADIPOSE_TISSUE	HP_ABNORMALITY_OF_FACIAL_ADIPOSE_TISSUE	1	-0.990476	-1.31071	0.0202133	0.585799	0.577092	9	tags=100%, list=1%, signal=99%
HP_ABNORMALITY_OF_IMMUNE_SERUM_PROTEIN_PHYSIOLOGY	HP_ABNORMALITY_OF_IMMUNE_SERUM_PROTEIN_PHYSIOLOGY	1	-0.990476	-1.31071	0.0202133	0.585799	0.577092	9	tags=100%, list=1%, signal=99%
HP_ABNORMALITY_OF_THE_EPIDIDYMIS	HP_ABNORMALITY_OF_THE_EPIDIDYMIS	1	-0.990476	-1.31071	0.0202133	0.585799	0.577092	9	tags=100%, list=1%, signal=99%
HP_ABNORMAL_FINGERTIP_MORPHOLOGY	HP_ABNORMAL_FINGERTIP_MORPHOLOGY	1	-0.990476	-1.31071	0.0202133	0.585799	0.577092	9	tags=100%, list=1%, signal=99%
HP_ABNORMAL_PAROTID_GLAND_MORPHOLOGY	HP_ABNORMAL_PAROTID_GLAND_MORPHOLOGY	1	-0.990476	-1.31071	0.0202133	0.585799	0.577092	9	tags=100%, list=1%, signal=99%
HP_ABNORMAL_SALIVARY_GLAND_MORPHOLOGY	HP_ABNORMAL_SALIVARY_GLAND_MORPHOLOGY	1	-0.990476	-1.31071	0.0202133	0.585799	0.577092	9	tags=100%, list=1%, signal=99%
HP_ABNORMAL_SERUM_INTERFERON_LEVEL	HP_ABNORMAL_SERUM_INTERFERON_LEVEL	1	-0.990476	-1.31071	0.0202133	0.585799	0.577092	9	tags=100%, list=1%, signal=99%
HP_ABNORMAL_SERUM_INTERLEUKIN_LEVEL	HP_ABNORMAL_SERUM_INTERLEUKIN_LEVEL	1	-0.990476	-1.31071	0.0202133	0.585799	0.577092	9	tags=100%, list=1%, signal=99%
HP_ABNORMAL_THYROID_STIMULATING_HORMONE_LEVEL	HP_ABNORMAL_THYROID_STIMULATING_HORMONE_LEVEL	1	-0.990476	-1.31071	0.0202133	0.585799	0.577092	9	tags=100%, list=1%, signal=99%
HP_ADIPOSE_TISSUE_LOSS	HP_ADIPOSE_TISSUE_LOSS	1	-0.990476	-1.31071	0.0202133	0.585799	0.577092	9	tags=100%, list=1%, signal=99%
HP_CLUBBING_OF_FINGERS	HP_CLUBBING_OF_FINGERS	1	-0.990476	-1.31071	0.0202133	0.585799	0.577092	9	tags=100%, list=1%, signal=99%
HP_DEATH_IN_ADOLESCENCE	HP_DEATH_IN_ADOLESCENCE	1	-0.990476	-1.31071	0.0202133	0.585799	0.577092	9	tags=100%, list=1%, signal=99%
HP_DECREASED_ADIPOSE_TISSUE	HP_DECREASED_ADIPOSE_TISSUE	1	-0.990476	-1.31071	0.0202133	0.585799	0.577092	9	tags=100%, list=1%, signal=99%
HP_EPISCLERITIS	HP_EPISCLERITIS	1	-0.990476	-1.31071	0.0202133	0.585799	0.577092	9	tags=100%, list=1%, signal=99%
HP_ERYTHEMA_NODOSUM	HP_ERYTHEMA_NODOSUM	1	-0.990476	-1.31071	0.0202133	0.585799	0.577092	9	tags=100%, list=1%, signal=99%
HP_GYNECOMASTIA	HP_GYNECOMASTIA	1	-0.990476	-1.31071	0.0202133	0.585799	0.577092	9	tags=100%, list=1%, signal=99%
HP_IMPAIRED_GLUCOSE_TOLERANCE	HP_IMPAIRED_GLUCOSE_TOLERANCE	1	-0.990476	-1.31071	0.0202133	0.585799	0.577092	9	tags=100%, list=1%, signal=99%
HP_INCREASED_CIRCULATING_IGA_LEVEL	HP_INCREASED_CIRCULATING_IGA_LEVEL	1	-0.990476	-1.31071	0.0202133	0.585799	0.577092	9	tags=100%, list=1%, signal=99%
HP_INCREASED_CIRCULATING_IGG_LEVEL	HP_INCREASED_CIRCULATING_IGG_LEVEL	1	-0.990476	-1.31071	0.0202133	0.585799	0.577092	9	tags=100%, list=1%, signal=99%
HP_PROGEROID_FACIAL_APPEARANCE	HP_PROGEROID_FACIAL_APPEARANCE	1	-0.990476	-1.31071	0.0202133	0.585799	0.577092	9	tags=100%, list=1%, signal=99%
HP_PROTUBERANT_ABDOMEN	HP_PROTUBERANT_ABDOMEN	1	-0.990476	-1.31071	0.0202133	0.585799	0.577092	9	tags=100%, list=1%, signal=99%
HP_STIFF_SKIN	HP_STIFF_SKIN	1	-0.990476	-1.31071	0.0202133	0.585799	0.577092	9	tags=100%, list=1%, signal=99%
WP_THE_HUMAN_IMMUNE_RESPONSE_TO_TUBERCULOSIS	WP_THE_HUMAN_IMMUNE_RESPONSE_TO_TUBERCULOSIS	1	-0.990476	-1.31071	0.0202133	0.585799	0.577092	9	tags=100%, list=1%, signal=99%
ZHU_CMV_8_HR_UP	ZHU_CMV_8_HR_UP	1	-0.990476	-1.31071	0.0202133	0.585799	0.577092	9	tags=100%, list=1%, signal=99%
DACOSTA_UV_RESPONSE_VIA_ERCC3_XPCS_DN	DACOSTA_UV_RESPONSE_VIA_ERCC3_XPCS_DN	3	-0.927076	-1.38371	0.0203647	0.58925	0.580491	22	tags=100%, list=3%, signal=97%	PDLIM5/PTX3
GOBP_ESTABLISHMENT_OF_TISSUE_POLARITY	GOBP_ESTABLISHMENT_OF_TISSUE_POLARITY	16	-0.680428	-1.48498	0.0205241	0.592918	0.584105	129	tags=62%, list=18%, signal=53%	PSMB3/PSMA2/PSMA4/PSMB4/PSMB9/PSMA1/PSMA3/PSMA5/PSMA7/PSMB8
GOBP_REGULATION_OF_EPITHELIAL_TO_MESENCHYMAL_TRANSITION	GOBP_REGULATION_OF_EPITHELIAL_TO_MESENCHYMAL_TRANSITION	3	-0.926553	-1.38293	0.0206309	0.594125	0.585293	35	tags=100%, list=5%, signal=96%	VASN/DAG1
ZHENG_FOXP3_TARGETS_IN_THYMUS_UP	ZHENG_FOXP3_TARGETS_IN_THYMUS_UP	5	-0.885276	-1.49751	0.0206311	0.594125	0.585293	57	tags=60%, list=8%, signal=56%	PSMA1/GDI2/LTA4H
GOMF_NUCLEOTIDASE_ACTIVITY	GOMF_NUCLEOTIDASE_ACTIVITY	1	0.990476	1.30701	0.0207033	0.594277	0.585444	8	tags=100%, list=1%, signal=99%	NT5DC3
GSE9960_GRAM_NEG_VS_GRAM_POS_SEPSIS_PBMC_UP	GSE9960_GRAM_NEG_VS_GRAM_POS_SEPSIS_PBMC_UP	11	-0.756936	-1.52209	0.0207476	0.594277	0.585444	120	tags=55%, list=16%, signal=46%	PSMA2/FTH1/PSMA3/UGP2/ICAM1/PSMA5
GSE25088_ROSIGLITAZONE_VS_IL4_AND_ROSIGLITAZONE_STIM_MACROPHAGE_DAY10_DN	GSE25088_ROSIGLITAZONE_VS_IL4_AND_ROSIGLITAZONE_STIM_MACROPHAGE_DAY10_DN	10	0.759731	1.66556	0.0208112	0.594277	0.585444	74	tags=30%, list=10%, signal=27%	MINPP1/SLC2A3/PFKP
WANG_BARRETTS_ESOPHAGUS_DN	WANG_BARRETTS_ESOPHAGUS_DN	4	-0.909836	-1.46399	0.020849	0.594277	0.585444	71	tags=100%, list=10%, signal=91%	LTA4H/S100A8/SERPINB1
REACTOME_ANTIGEN_PROCESSING_UBIQUITINATION_PROTEASOME_DEGRADATION	REACTOME_ANTIGEN_PROCESSING_UBIQUITINATION_PROTEASOME_DEGRADATION	15	-0.711384	-1.52214	0.0208628	0.594277	0.585444	129	tags=67%, list=18%, signal=56%	PSMB3/PSMA2/PSMA4/PSMB4/PSMB9/PSMA1/PSMA3/PSMA5/PSMA7/PSMB8
REACTOME_ANTIMICROBIAL_PEPTIDES	REACTOME_ANTIMICROBIAL_PEPTIDES	15	-0.711322	-1.52201	0.0208628	0.594277	0.585444	134	tags=67%, list=18%, signal=56%	PRTN3/DEFA3/REG3A/LCN2/CHGA/LTF/PLA2G2A/S100A8/ELANE/S100A9
GSE15139_GMCSF_TREATED_VS_UNTREATED_NEUTROPHILS_UP	GSE15139_GMCSF_TREATED_VS_UNTREATED_NEUTROPHILS_UP	7	-0.823075	-1.48247	0.020925	0.594277	0.585444	84	tags=71%, list=11%, signal=64%	NID1/CLIC1/CSRP1/ACAA2/LTA4H
GSE6674_UNSTIM_VS_ANTI_IGM_AND_CPG_STIM_BCELL_UP	GSE6674_UNSTIM_VS_ANTI_IGM_AND_CPG_STIM_BCELL_UP	7	-0.82293	-1.48221	0.020925	0.594277	0.585444	132	tags=86%, list=18%, signal=71%	GBE1/PYGL/SORD/DAG1/DDT/SELENBP1
GOBP_PROTEOLYSIS	GOBP_PROTEOLYSIS	152	-0.440657	-1.31175	0.0209303	0.594277	0.585444	134	tags=20%, list=18%, signal=20%	PRTN3/CPS1/PSMB3/CES1/PSMA2/SRGN/PEBP1/COL6A3/WFDC2/PSMA4/FABP1/PSMB4/LAP3/SNCA/CTSD/LTF/PSMB9/PSMA1/PSMA3/DAG1/LTA4H/MMP9/TIMP1/PSMA5/S100A8/ELANE/PSMA7/PSMB8/SERPINB1/S100A9
GOBP_PROTEIN_POLYUBIQUITINATION	GOBP_PROTEIN_POLYUBIQUITINATION	15	-0.710773	-1.52084	0.021079	0.597568	0.588685	129	tags=67%, list=18%, signal=56%	PSMB3/PSMA2/PSMA4/PSMB4/PSMB9/PSMA1/PSMA3/PSMA5/PSMA7/PSMB8
WP_SENESCENCE_AND_AUTOPHAGY_IN_CANCER	WP_SENESCENCE_AND_AUTOPHAGY_IN_CANCER	10	0.758761	1.66343	0.0212517	0.599808	0.590892	23	tags=20%, list=3%, signal=20%	SPARC/SERPINE1
BIOCARTA_PLATELETAPP_PATHWAY	BIOCARTA_PLATELETAPP_PATHWAY	5	0.859692	1.55282	0.0212946	0.599808	0.590892	23	tags=20%, list=3%, signal=20%	SERPINE1
GSE4748_CYANOBACTERIUM_LPSLIKE_VS_LPS_AND_CYANOBACTERIUM_LPSLIKE_STIM_DC_3H_DN	GSE4748_CYANOBACTERIUM_LPSLIKE_VS_LPS_AND_CYANOBACTERIUM_LPSLIKE_STIM_DC_3H_DN	14	-0.704734	-1.49826	0.021296	0.599808	0.590892	161	tags=57%, list=22%, signal=46%	VASP/PRTN3/PYGL/LCN2/LTF/MMP9/ELANE/S100A9
GOCC_COPII_COATED_ER_TO_GOLGI_TRANSPORT_VESICLE	GOCC_COPII_COATED_ER_TO_GOLGI_TRANSPORT_VESICLE	9	0.770472	1.65105	0.0213431	0.599808	0.590892	10	tags=22%, list=1%, signal=22%	CD59/HLA-C
GSE41978_WT_VS_BIM_KO_KLRG1_LOW_EFFECTOR_CD8_TCELL_UP	GSE41978_WT_VS_BIM_KO_KLRG1_LOW_EFFECTOR_CD8_TCELL_UP	4	-0.909331	-1.46318	0.0213544	0.599808	0.590892	38	tags=50%, list=5%, signal=48%	APOF/PTGR1
GSE19888_ADENOSINE_A3R_INH_VS_ACT_WITH_INHIBITOR_PRETREATMENT_IN_MAST_CELL_UP	GSE19888_ADENOSINE_A3R_INH_VS_ACT_WITH_INHIBITOR_PRETREATMENT_IN_MAST_CELL_UP	9	-0.80565	-1.55456	0.0213558	0.599808	0.590892	59	tags=44%, list=8%, signal=41%	B2M/FCGR3A/PSMB9/PSMB8
HP_ABNORMALITY_OF_ULNAR_METAPHYSIS	HP_ABNORMALITY_OF_ULNAR_METAPHYSIS	2	-0.965085	-1.34119	0.021549	0.60327	0.594303	25	tags=100%, list=3%, signal=97%	MMP9
HP_ABNORMALITY_OF_UPPER_LIMB_METAPHYSIS	HP_ABNORMALITY_OF_UPPER_LIMB_METAPHYSIS	2	-0.965085	-1.34119	0.021549	0.60327	0.594303	25	tags=100%, list=3%, signal=97%	MMP9
GSE19888_ADENOSINE_A3R_INH_PRETREAT_AND_ACT_BY_A3R_VS_TCELL_MEMBRANES_ACT_MAST_CELL_UP	GSE19888_ADENOSINE_A3R_INH_PRETREAT_AND_ACT_BY_A3R_VS_TCELL_MEMBRANES_ACT_MAST_CELL_UP	9	-0.805516	-1.5543	0.0215892	0.60327	0.594303	59	tags=33%, list=8%, signal=31%	PSMB9/TIMP1/PSMB8
GSE7460_FOXP3_MUT_VS_WT_ACT_TCONV_UP	GSE7460_FOXP3_MUT_VS_WT_ACT_TCONV_UP	5	-0.88385	-1.4951	0.0216437	0.60327	0.594303	55	tags=60%, list=7%, signal=56%	IGHG1/SPP1/LGALS1
GSE26351_UNSTIM_VS_BMP_PATHWAY_STIM_HEMATOPOIETIC_PROGENITORS_UP	GSE26351_UNSTIM_VS_BMP_PATHWAY_STIM_HEMATOPOIETIC_PROGENITORS_UP	11	-0.754657	-1.5175	0.0216448	0.60327	0.594303	144	tags=64%, list=20%, signal=52%	NPM1/GPI/PSMB4/CORO1A/PSMA1/GDI2/PSMA7
GOBP_NEGATIVE_REGULATION_OF_VASCULATURE_DEVELOPMENT	GOBP_NEGATIVE_REGULATION_OF_VASCULATURE_DEVELOPMENT	10	0.757723	1.66116	0.0216921	0.60363	0.594658	53	tags=30%, list=7%, signal=28%	SPARC/SERPINE1/THBS4
GSE2770_IL12_AND_TGFB_ACT_VS_ACT_CD4_TCELL_6H_DN	GSE2770_IL12_AND_TGFB_ACT_VS_ACT_CD4_TCELL_6H_DN	14	-0.704013	-1.49672	0.0217241	0.60363	0.594658	76	tags=29%, list=10%, signal=26%	NRP1/SNCA/PSMA5/NUCB1
GSE27670_CTRL_VS_BLIMP1_TRANSDUCED_GC_BCELL_UP	GSE27670_CTRL_VS_BLIMP1_TRANSDUCED_GC_BCELL_UP	22	-0.657249	-1.5224	0.0219875	0.61002	0.600953	133	tags=41%, list=18%, signal=35%	KRT1/CES1/COL6A3/KRT86/PRKCSH/PTX3/SPARCL1/S100A8/SERPINB1
GSE34156_TLR1_TLR2_LIGAND_VS_NOD2_AND_TLR1_TLR2_LIGAND_24H_TREATED_MONOCYTE_DN	GSE34156_TLR1_TLR2_LIGAND_VS_NOD2_AND_TLR1_TLR2_LIGAND_24H_TREATED_MONOCYTE_DN	10	0.753907	1.65279	0.0221326	0.612723	0.603616	84	tags=30%, list=11%, signal=27%	PRDX1/RGS18/CELA2A
GSE19888_CTRL_VS_TCELL_MEMBRANES_ACT_MAST_CELL_PRETREAT_A3R_INH_UP	GSE19888_CTRL_VS_TCELL_MEMBRANES_ACT_MAST_CELL_PRETREAT_A3R_INH_UP	13	-0.729376	-1.53948	0.022186	0.612723	0.603616	89	tags=46%, list=12%, signal=41%	CSF1R/MROH2A/BPGM/FBLN5/CD163/SELENBP1
VILLANUEVA_LIVER_CANCER_KRT19_DN	VILLANUEVA_LIVER_CANCER_KRT19_DN	13	-0.72894	-1.53856	0.022186	0.612723	0.603616	72	tags=31%, list=10%, signal=28%	IGFBP2/SDC1/APOA5/DDT
IKEDA_MIR30_TARGETS_DN	IKEDA_MIR30_TARGETS_DN	2	0.964683	1.37453	0.0224248	0.614744	0.605606	4	tags=50%, list=1%, signal=50%	CDH13
GSE22196_HEALTHY_VS_OBESE_MOUSE_SKIN_GAMMADELTA_TCELL_DN	GSE22196_HEALTHY_VS_OBESE_MOUSE_SKIN_GAMMADELTA_TCELL_DN	23	-0.634569	-1.48283	0.0225129	0.614744	0.605606	84	tags=35%, list=11%, signal=32%	CLIC1/CSRP1/CD163/LGALS1/PTX3/S100A8/MRC1/S100A9
REACTOME_PROGRAMMED_CELL_DEATH	REACTOME_PROGRAMMED_CELL_DEATH	23	-0.633712	-1.48083	0.0225129	0.614744	0.605606	169	tags=65%, list=23%, signal=52%	PSMB5/YWHAB/CDH1/PSMB3/PSMA2/YWHAG/PSMA4/PSMB4/PSMB9/PSMA1/PSMA3/PSMA5/ELANE/PSMA7/PSMB8
REACTOME_TOLL_LIKE_RECEPTOR_CASCADES	REACTOME_TOLL_LIKE_RECEPTOR_CASCADES	11	-0.752969	-1.51411	0.022542	0.614744	0.605606	16	tags=45%, list=2%, signal=45%	LBP/UBC/SAA1/S100A8/S100A9
GOBP_CELLULAR_RESPONSE_TO_GROWTH_HORMONE_STIMULUS	GOBP_CELLULAR_RESPONSE_TO_GROWTH_HORMONE_STIMULUS	1	-0.989116	-1.30891	0.0225739	0.614744	0.605606	10	tags=100%, list=1%, signal=99%
GOMF_GROWTH_HORMONE_RECEPTOR_BINDING	GOMF_GROWTH_HORMONE_RECEPTOR_BINDING	1	-0.989116	-1.30891	0.0225739	0.614744	0.605606	10	tags=100%, list=1%, signal=99%
GSE7831_UNSTIM_VS_INFLUENZA_STIM_PDC_1H_UP	GSE7831_UNSTIM_VS_INFLUENZA_STIM_PDC_1H_UP	13	-0.727177	-1.53484	0.0226167	0.614744	0.605606	53	tags=54%, list=7%, signal=51%	MDH1/CDH1/ASL/ACAA2/DDT/PSMB8/NUCB1
REACTOME_NEURONAL_SYSTEM	REACTOME_NEURONAL_SYSTEM	13	0.692166	1.62022	0.0226491	0.614744	0.605606	108	tags=38%, list=15%, signal=33%	TUBB8/TUBA8/RAC1/KPNA2/TUBA1C
GSE36888_UNTREATED_VS_IL2_TREATED_TCELL_6H_UP	GSE36888_UNTREATED_VS_IL2_TREATED_TCELL_6H_UP	7	-0.820455	-1.47775	0.0226792	0.614744	0.605606	16	tags=57%, list=2%, signal=56%	FTH1/S100A8/SERPINB1/S100A9
GOBP_CELL_DIFFERENTIATION_INVOLVED_IN_KIDNEY_DEVELOPMENT	GOBP_CELL_DIFFERENTIATION_INVOLVED_IN_KIDNEY_DEVELOPMENT	2	-0.963617	-1.33915	0.0229215	0.614744	0.605606	25	tags=100%, list=3%, signal=97%	MMP9
GOBP_EPITHELIAL_CELL_DIFFERENTIATION_INVOLVED_IN_KIDNEY_DEVELOPMENT	GOBP_EPITHELIAL_CELL_DIFFERENTIATION_INVOLVED_IN_KIDNEY_DEVELOPMENT	2	-0.963617	-1.33915	0.0229215	0.614744	0.605606	25	tags=100%, list=3%, signal=97%	MMP9
GSE14769_20MIN_VS_360MIN_LPS_BMDM_DN	GSE14769_20MIN_VS_360MIN_LPS_BMDM_DN	8	-0.792983	-1.49303	0.0230993	0.614744	0.605606	97	tags=50%, list=13%, signal=44%	OAF/TXN/TIMP1/DDT
BAUS_TFF2_TARGETS_UP	BAUS_TFF2_TARGETS_UP	4	-0.906619	-1.45882	0.0231234	0.614744	0.605606	59	tags=50%, list=8%, signal=46%	PSMB9/PSMB8
GSE36009_UNSTIM_VS_LPS_STIM_NLRP10_KO_DC_DN	GSE36009_UNSTIM_VS_LPS_STIM_NLRP10_KO_DC_DN	4	-0.906378	-1.45843	0.0231234	0.614744	0.605606	12	tags=50%, list=2%, signal=49%	ERN1/PSMA7
GSE26669_CTRL_VS_COSTIM_BLOCK_MLR_CD4_TCELL_UP	GSE26669_CTRL_VS_COSTIM_BLOCK_MLR_CD4_TCELL_UP	11	-0.749047	-1.50622	0.0232171	0.614744	0.605606	37	tags=36%, list=5%, signal=35%	GPI/PSMA3/PSMA7/NUCB1
JOHANSSON_GLIOMAGENESIS_BY_PDGFB_UP	JOHANSSON_GLIOMAGENESIS_BY_PDGFB_UP	11	-0.749606	-1.50735	0.0232171	0.614744	0.605606	87	tags=45%, list=12%, signal=41%	HNRNPA1/SPP1/MCAM/FTL/LGALS1
GOBP_CHOLESTEROL_EFFLUX	GOBP_CHOLESTEROL_EFFLUX	15	-0.706363	-1.5114	0.0232474	0.614744	0.605606	125	tags=20%, list=17%, signal=17%	CES1/APOA5/TSKU
GSE4748_CTRL_VS_LPS_STIM_DC_3H_DN	GSE4748_CTRL_VS_LPS_STIM_DC_3H_DN	15	-0.706807	-1.51235	0.0232474	0.614744	0.605606	63	tags=33%, list=9%, signal=31%	OIT3/COL18A1/MYO5A/S100A8/SELENBP1
BOQUEST_STEM_CELL_UP	BOQUEST_STEM_CELL_UP	43	-0.556945	-1.42218	0.0234917	0.614744	0.605606	159	tags=26%, list=22%, signal=21%	VCAN/PTGDS/CES1/COL6A3/TNC/OGN/FBLN5/PLA2G2A/PTX3/TIMP1/COL6A1
WHITESIDE_CISPLATIN_RESISTANCE_DN	WHITESIDE_CISPLATIN_RESISTANCE_DN	3	-0.923941	-1.37903	0.0235591	0.614744	0.605606	21	tags=67%, list=3%, signal=65%	SOD1/TIMP1
GSE27786_CD8_TCELL_VS_NKCELL_DN	GSE27786_CD8_TCELL_VS_NKCELL_DN	8	0.777671	1.60361	0.0236119	0.614744	0.605606	35	tags=25%, list=5%, signal=24%	CAPZA1/CKB
GSE22140_HEALTHY_VS_ARTHRITIC_MOUSE_CD4_TCELL_UP	GSE22140_HEALTHY_VS_ARTHRITIC_MOUSE_CD4_TCELL_UP	21	-0.653594	-1.4985	0.0236433	0.614744	0.605606	59	tags=33%, list=8%, signal=32%	TYMP/PSMB9/DAG1/LTA4H/S100A8/CHI3L1/S100A9
TSAI_DNAJB4_TARGETS_DN	TSAI_DNAJB4_TARGETS_DN	2	0.96344	1.37276	0.0237343	0.614744	0.605606	22	tags=50%, list=3%, signal=49%	CALD1
GOBP_SMALL_MOLECULE_METABOLIC_PROCESS	GOBP_SMALL_MOLECULE_METABOLIC_PROCESS	135	-0.450848	-1.32973	0.0238156	0.614744	0.605606	158	tags=32%, list=21%, signal=31%	CBR3/PTGDS/IGFBP4/VNN1/SLC4A1/LIPC/CPS1/PSMB3/FABP3/CES1/ASL/PSMA2/SORD/CKM/TYMP/GPI/GOT2/PSMA4/FABP1/TKT/PSMB4/HINT1/PKLR/SNCA/BPGM/PSMB9/PSMA1/BHMT/TXN/ACAA2/NUP214/APOA5/PTGR1/PSMA3/LTA4H/UGP2/MPO/PSMA5/TSKU/CA3/PSMA7/B4GALT1/PSMB8
GOBP_AMYLOID_BETA_CLEARANCE	GOBP_AMYLOID_BETA_CLEARANCE	5	0.856884	1.54774	0.0238426	0.614744	0.605606	91	tags=40%, list=12%, signal=35%	RAB11A/CLTC
GSE22432_MULTIPOTENT_PROGENITOR_VS_PDC_UP	GSE22432_MULTIPOTENT_PROGENITOR_VS_PDC_UP	5	0.857028	1.548	0.0238426	0.614744	0.605606	53	tags=40%, list=7%, signal=37%	RAB11A/THBS4
MEBARKI_HCC_PROGENITOR_WNT_DN	MEBARKI_HCC_PROGENITOR_WNT_DN	4	-0.904466	-1.45535	0.0238815	0.614744	0.605606	68	tags=50%, list=9%, signal=46%	SPTB/MRC1
BLANCO_MELO_RESPIRATORY_SYNCYTIAL_VIRUS_INFECTION_A594_CELLS_UP	BLANCO_MELO_RESPIRATORY_SYNCYTIAL_VIRUS_INFECTION_A594_CELLS_UP	21	-0.652456	-1.49589	0.0240474	0.614744	0.605606	116	tags=43%, list=16%, signal=37%	HSPA1B/SAA2/FSTL1/LAP3/TNC/IGFBP1/ICAM1/MMP9/PTX3
GOCC_SPECIFIC_GRANULE_LUMEN	GOCC_SPECIFIC_GRANULE_LUMEN	21	-0.649605	-1.48936	0.0240474	0.614744	0.605606	101	tags=29%, list=14%, signal=25%	LCN2/CTSD/LTF/PTX3/ELANE/CHI3L1
HOEK_NK_CELL_2011_2012_TIV_3D_VS_0DY_ADULT_3D_DN	HOEK_NK_CELL_2011_2012_TIV_3D_VS_0DY_ADULT_3D_DN	21	-0.650192	-1.4907	0.0240474	0.614744	0.605606	125	tags=43%, list=17%, signal=37%	VCAN/CES1/PYGL/TYMP/OAF/CSF1R/CD163/S100A8/S100A9
GOBP_ACROSOME_REACTION	GOBP_ACROSOME_REACTION	1	-0.987755	-1.30711	0.0240493	0.614744	0.605606	11	tags=100%, list=1%, signal=99%
GOBP_DEVELOPMENT_OF_SECONDARY_SEXUAL_CHARACTERISTICS	GOBP_DEVELOPMENT_OF_SECONDARY_SEXUAL_CHARACTERISTICS	1	-0.987755	-1.30711	0.0240493	0.614744	0.605606	11	tags=100%, list=1%, signal=99%
GOBP_PENETRATION_OF_ZONA_PELLUCIDA	GOBP_PENETRATION_OF_ZONA_PELLUCIDA	1	-0.987755	-1.30711	0.0240493	0.614744	0.605606	11	tags=100%, list=1%, signal=99%
GOBP_POSITIVE_REGULATION_OF_EPITHELIAL_CELL_PROLIFERATION_INVOLVED_IN_WOUND_HEALING	GOBP_POSITIVE_REGULATION_OF_EPITHELIAL_CELL_PROLIFERATION_INVOLVED_IN_WOUND_HEALING	1	-0.987755	-1.30711	0.0240493	0.614744	0.605606	11	tags=100%, list=1%, signal=99%
GOBP_PROTEIN_N_LINKED_GLYCOSYLATION	GOBP_PROTEIN_N_LINKED_GLYCOSYLATION	1	-0.987755	-1.30711	0.0240493	0.614744	0.605606	11	tags=100%, list=1%, signal=99%
GOBP_REGULATION_OF_ACROSOME_REACTION	GOBP_REGULATION_OF_ACROSOME_REACTION	1	-0.987755	-1.30711	0.0240493	0.614744	0.605606	11	tags=100%, list=1%, signal=99%
GOCC_DESMOSOME	GOCC_DESMOSOME	1	-0.987755	-1.30711	0.0240493	0.614744	0.605606	11	tags=100%, list=1%, signal=99%
GOCC_GOLGI_TRANS_CISTERNA	GOCC_GOLGI_TRANS_CISTERNA	1	-0.987755	-1.30711	0.0240493	0.614744	0.605606	11	tags=100%, list=1%, signal=99%
GOMF_GALACTOSYLTRANSFERASE_ACTIVITY	GOMF_GALACTOSYLTRANSFERASE_ACTIVITY	1	-0.987755	-1.30711	0.0240493	0.614744	0.605606	11	tags=100%, list=1%, signal=99%
GOMF_N_ACETYLLACTOSAMINE_SYNTHASE_ACTIVITY	GOMF_N_ACETYLLACTOSAMINE_SYNTHASE_ACTIVITY	1	-0.987755	-1.30711	0.0240493	0.614744	0.605606	11	tags=100%, list=1%, signal=99%
GOMF_UDP_GALACTOSYLTRANSFERASE_ACTIVITY	GOMF_UDP_GALACTOSYLTRANSFERASE_ACTIVITY	1	-0.987755	-1.30711	0.0240493	0.614744	0.605606	11	tags=100%, list=1%, signal=99%
GOMF_UDP_GLYCOSYLTRANSFERASE_ACTIVITY	GOMF_UDP_GLYCOSYLTRANSFERASE_ACTIVITY	1	-0.987755	-1.30711	0.0240493	0.614744	0.605606	11	tags=100%, list=1%, signal=99%
KEGG_GLYCOSAMINOGLYCAN_BIOSYNTHESIS_KERATAN_SULFATE	KEGG_GLYCOSAMINOGLYCAN_BIOSYNTHESIS_KERATAN_SULFATE	1	-0.987755	-1.30711	0.0240493	0.614744	0.605606	11	tags=100%, list=1%, signal=99%
KEGG_GLYCOSPHINGOLIPID_BIOSYNTHESIS_LACTO_AND_NEOLACTO_SERIES	KEGG_GLYCOSPHINGOLIPID_BIOSYNTHESIS_LACTO_AND_NEOLACTO_SERIES	1	-0.987755	-1.30711	0.0240493	0.614744	0.605606	11	tags=100%, list=1%, signal=99%
MATZUK_POSTIMPLANTATION_AND_POSTPARTUM	MATZUK_POSTIMPLANTATION_AND_POSTPARTUM	1	-0.987755	-1.30711	0.0240493	0.614744	0.605606	11	tags=100%, list=1%, signal=99%
REACTOME_DISEASES_ASSOCIATED_WITH_N_GLYCOSYLATION_OF_PROTEINS	REACTOME_DISEASES_ASSOCIATED_WITH_N_GLYCOSYLATION_OF_PROTEINS	1	-0.987755	-1.30711	0.0240493	0.614744	0.605606	11	tags=100%, list=1%, signal=99%
REACTOME_FERTILIZATION	REACTOME_FERTILIZATION	1	-0.987755	-1.30711	0.0240493	0.614744	0.605606	11	tags=100%, list=1%, signal=99%
REACTOME_INTERACTION_WITH_CUMULUS_CELLS_AND_THE_ZONA_PELLUCIDA	REACTOME_INTERACTION_WITH_CUMULUS_CELLS_AND_THE_ZONA_PELLUCIDA	1	-0.987755	-1.30711	0.0240493	0.614744	0.605606	11	tags=100%, list=1%, signal=99%
REACTOME_N_GLYCAN_ANTENNAE_ELONGATION	REACTOME_N_GLYCAN_ANTENNAE_ELONGATION	1	-0.987755	-1.30711	0.0240493	0.614744	0.605606	11	tags=100%, list=1%, signal=99%
REACTOME_N_GLYCAN_ANTENNAE_ELONGATION_IN_THE_MEDIAL_TRANS_GOLGI	REACTOME_N_GLYCAN_ANTENNAE_ELONGATION_IN_THE_MEDIAL_TRANS_GOLGI	1	-0.987755	-1.30711	0.0240493	0.614744	0.605606	11	tags=100%, list=1%, signal=99%
REACTOME_REPRODUCTION	REACTOME_REPRODUCTION	1	-0.987755	-1.30711	0.0240493	0.614744	0.605606	11	tags=100%, list=1%, signal=99%
WP_GLYCOSYLATION_AND_RELATED_CONGENITAL_DEFECTS	WP_GLYCOSYLATION_AND_RELATED_CONGENITAL_DEFECTS	1	-0.987755	-1.30711	0.0240493	0.614744	0.605606	11	tags=100%, list=1%, signal=99%
WP_METABOLISM_OF_SPINGOLIPIDS_IN_ER_AND_GOLGI_APPARATUS	WP_METABOLISM_OF_SPINGOLIPIDS_IN_ER_AND_GOLGI_APPARATUS	1	-0.987755	-1.30711	0.0240493	0.614744	0.605606	11	tags=100%, list=1%, signal=99%
DAZARD_UV_RESPONSE_CLUSTER_G24	DAZARD_UV_RESPONSE_CLUSTER_G24	3	-0.923425	-1.37826	0.0240916	0.61479	0.605652	43	tags=67%, list=6%, signal=63%	IL1RL1/S100A9
IZADPANAH_STEM_CELL_ADIPOSE_VS_BONE_UP	IZADPANAH_STEM_CELL_ADIPOSE_VS_BONE_UP	11	-0.747649	-1.50341	0.0241187	0.61479	0.605652	117	tags=64%, list=16%, signal=54%	MT1X/SRGN/LAP3/PSMB9/PTGR1/PSMB8/SERPINB1
BIOCARTA_PROTEASOME_PATHWAY	BIOCARTA_PROTEASOME_PATHWAY	10	-0.764205	-1.51393	0.0241912	0.614917	0.605777	129	tags=100%, list=18%, signal=84%	PSMB5/PSMB3/PSMA2/PSMA4/PSMB4/PSMA1/PSMA3/PSMA5/PSMA7
LE_EGR2_TARGETS_DN	LE_EGR2_TARGETS_DN	10	-0.765392	-1.51629	0.0241912	0.614917	0.605777	157	tags=70%, list=21%, signal=56%	PTGDS/FTH1/MT1X/TKT/SNCA/OGN/CA3
GOBP_NEGATIVE_REGULATION_OF_RESPONSE_TO_BIOTIC_STIMULUS	GOBP_NEGATIVE_REGULATION_OF_RESPONSE_TO_BIOTIC_STIMULUS	8	-0.791104	-1.48949	0.0242962	0.615864	0.60671	60	tags=38%, list=8%, signal=35%	HLA-B/LTF/VSIG4
GOBP_POSITIVE_REGULATION_OF_APOPTOTIC_SIGNALING_PATHWAY	GOBP_POSITIVE_REGULATION_OF_APOPTOTIC_SIGNALING_PATHWAY	8	-0.791554	-1.49034	0.0242962	0.615864	0.60671	16	tags=38%, list=2%, signal=37%	PDIA3/S100A8/S100A9
GSE34156_NOD2_LIGAND_VS_TLR1_TLR2_LIGAND_6H_TREATED_MONOCYTE_DN	GSE34156_NOD2_LIGAND_VS_TLR1_TLR2_LIGAND_6H_TREATED_MONOCYTE_DN	20	-0.664227	-1.51112	0.024386	0.617282	0.608107	84	tags=35%, list=11%, signal=32%	CLIC1/CTSD/CD163/FTL/CD93/PLA2G2A/TIMP1
REACTOME_ER_TO_GOLGI_ANTEROGRADE_TRANSPORT	REACTOME_ER_TO_GOLGI_ANTEROGRADE_TRANSPORT	16	0.641182	1.6323	0.0245062	0.619463	0.610255	65	tags=31%, list=9%, signal=29%	CD59/CAPZA1/TUBB8/TUBA8/SPTA1
GOBP_GLYCOPROTEIN_METABOLIC_PROCESS	GOBP_GLYCOPROTEIN_METABOLIC_PROCESS	11	-0.745352	-1.49879	0.0245695	0.620201	0.610982	45	tags=45%, list=6%, signal=43%	VCAN/GANAB/PRKCSH/PTX3/B4GALT1
HP_NAIL_PITS	HP_NAIL_PITS	1	0.987755	1.30342	0.0246323	0.620724	0.611497	10	tags=100%, list=1%, signal=99%	HLA-C
GOBP_SECOND_MESSENGER_MEDIATED_SIGNALING	GOBP_SECOND_MESSENGER_MEDIATED_SIGNALING	9	0.767687	1.64508	0.0246584	0.620724	0.611497	12	tags=22%, list=2%, signal=22%	CDH13/PTBP1
GSE13547_WT_VS_ZFX_KO_BCELL_DN	GSE13547_WT_VS_ZFX_KO_BCELL_DN	12	-0.724753	-1.49796	0.0248018	0.623471	0.614203	84	tags=50%, list=11%, signal=45%	PSMA6/ACTG1/CLIC1/PSMA1/PSMA5/S100A9
SASAI_RESISTANCE_TO_NEOPLASTIC_TRANSFROMATION	SASAI_RESISTANCE_TO_NEOPLASTIC_TRANSFROMATION	6	-0.832933	-1.46647	0.0249345	0.625083	0.615792	85	tags=67%, list=12%, signal=59%	FSTL1/CSRP1/FBLN5/IL1RL1
GOBP_LOCALIZATION_WITHIN_MEMBRANE	GOBP_LOCALIZATION_WITHIN_MEMBRANE	6	0.828995	1.56983	0.0249346	0.625083	0.615792	47	tags=33%, list=6%, signal=31%	CDH13/RAC1
GOBP_EYE_MORPHOGENESIS	GOBP_EYE_MORPHOGENESIS	3	-0.922253	-1.37651	0.0251564	0.628909	0.619561	17	tags=67%, list=2%, signal=65%	EFEMP1/TSKU
GSE45739_NRAS_KO_VS_WT_UNSTIM_CD4_TCELL_DN	GSE45739_NRAS_KO_VS_WT_UNSTIM_CD4_TCELL_DN	3	-0.922071	-1.37624	0.0251564	0.628909	0.619561	31	tags=67%, list=4%, signal=64%	SELL/LTA4H
GOMF_CYTOKINE_BINDING	GOMF_CYTOKINE_BINDING	12	-0.72451	-1.49746	0.0252408	0.630153	0.620787	89	tags=42%, list=12%, signal=37%	NRP1/CSF1R/IL1RL1/TSKU/ELANE
GSE17721_LPS_VS_GARDIQUIMOD_2H_BMDC_DN	GSE17721_LPS_VS_GARDIQUIMOD_2H_BMDC_DN	7	0.826635	1.65637	0.025304	0.630498	0.621126	51	tags=57%, list=7%, signal=54%	CAPZA1/HLA-C/ARHGDIA/VDAC3
GOMF_GUANYL_NUCLEOTIDE_BINDING	GOMF_GUANYL_NUCLEOTIDE_BINDING	17	0.644703	1.68869	0.0253819	0.630498	0.621126	204	tags=82%, list=28%, signal=61%	RAB11A/TUBB8/EEF2/TUBA8/RAC1/RAB27B/TUBA1C/RAP1B/GLUD1/EEF1A1/TUBA4A/TUBA1B/TUBB4B/TUBB6
PID_GLYPICAN_1PATHWAY	PID_GLYPICAN_1PATHWAY	2	-0.961765	-1.33658	0.025392	0.630498	0.621126	29	tags=100%, list=4%, signal=96%	PLA2G2A
HP_ABNORMAL_HAND_MORPHOLOGY	HP_ABNORMAL_HAND_MORPHOLOGY	10	0.747777	1.63935	0.0254511	0.630498	0.621126	167	tags=70%, list=23%, signal=55%	PSAT1/RAC1/AIFM1/IGF2/TPM2/MGP/RPS7
GOBP_LEUKOCYTE_CELL_CELL_ADHESION	GOBP_LEUKOCYTE_CELL_CELL_ADHESION	26	-0.617784	-1.46829	0.0254858	0.630498	0.621126	90	tags=31%, list=12%, signal=28%	CORO1A/IGFBP2/LGALS1/ICAM1/VSIG4/S100A8/ELANE/S100A9
GSE34205_RSV_VS_FLU_INF_INFANT_PBMC_UP	GSE34205_RSV_VS_FLU_INF_INFANT_PBMC_UP	10	-0.761958	-1.50948	0.0255477	0.630498	0.621126	76	tags=50%, list=10%, signal=45%	SLC4A1/SNCA/BPGM/SPTB/SELENBP1
HP_POLYNEUROPATHY	HP_POLYNEUROPATHY	5	0.855091	1.54451	0.0256626	0.630498	0.621126	54	tags=40%, list=7%, signal=37%	CD59/AIFM1
CROMER_METASTASIS_DN	CROMER_METASTASIS_DN	7	0.824049	1.65119	0.0256734	0.630498	0.621126	74	tags=57%, list=10%, signal=52%	CKB/GSTP1/VDAC3/PFKP
APPEL_IMATINIB_RESPONSE	APPEL_IMATINIB_RESPONSE	6	-0.83055	-1.46228	0.0256813	0.630498	0.621126	74	tags=33%, list=10%, signal=30%	CTSD/CD163
GOBP_CHONDROCYTE_DIFFERENTIATION	GOBP_CHONDROCYTE_DIFFERENTIATION	6	-0.831621	-1.46416	0.0256813	0.630498	0.621126	17	tags=33%, list=2%, signal=33%	TGFBI/TSKU
GOBP_NEGATIVE_REGULATION_OF_ESTABLISHMENT_OF_PROTEIN_LOCALIZATION	GOBP_NEGATIVE_REGULATION_OF_ESTABLISHMENT_OF_PROTEIN_LOCALIZATION	6	-0.831195	-1.46341	0.0256813	0.630498	0.621126	64	tags=33%, list=9%, signal=31%	CHGA/TXN
HP_INCREASED_BODY_WEIGHT	HP_INCREASED_BODY_WEIGHT	6	0.827903	1.56776	0.0256845	0.630498	0.621126	24	tags=17%, list=3%, signal=16%	FHL1
PID_CMYB_PATHWAY	PID_CMYB_PATHWAY	8	-0.78932	-1.48613	0.0257395	0.630498	0.621126	134	tags=50%, list=18%, signal=41%	PRTN3/CSF1R/MPO/ELANE
CAIRO_LIVER_DEVELOPMENT_DN	CAIRO_LIVER_DEVELOPMENT_DN	80	-0.5023	-1.40468	0.0257396	0.630498	0.621126	151	tags=21%, list=21%, signal=19%	CDH1/LIPC/PRTN3/CPS1/CES1/PYGL/LCN2/LTF/BHMT/ACAA2/IGFBP1/MPO/PRG2/S100A8/ELANE/S100A9/SELENBP1
GOMF_PEPTIDASE_ACTIVITY	GOMF_PEPTIDASE_ACTIVITY	67	-0.516467	-1.41544	0.0257786	0.630606	0.621232	142	tags=28%, list=19%, signal=25%	PAPPA/PRTN3/CPS1/PSMB3/PSMA2/PSMA4/PSMB4/LAP3/CTSD/LTF/PSMB9/PSMA1/PSMA3/LTA4H/MMP9/PSMA5/ELANE/PSMA7/PSMB8
PARK_APL_PATHOGENESIS_DN	PARK_APL_PATHOGENESIS_DN	10	-0.760988	-1.50756	0.0259999	0.634153	0.624727	134	tags=70%, list=18%, signal=58%	PRTN3/CES1/SRGN/GPI/CORO1A/CTSD/ELANE
GSE40274_CTRL_VS_FOXP3_AND_SATB1_TRANSDUCED_ACTIVATED_CD4_TCELL_DN	GSE40274_CTRL_VS_FOXP3_AND_SATB1_TRANSDUCED_ACTIVATED_CD4_TCELL_DN	9	-0.799918	-1.5435	0.0260352	0.634153	0.624727	84	tags=56%, list=11%, signal=50%	CLIC1/SDC1/CHGA/FBLN5/TIMP1
GSE3039_ALPHAALPHA_CD8_TCELL_VS_B2_BCELL_DN	GSE3039_ALPHAALPHA_CD8_TCELL_VS_B2_BCELL_DN	13	-0.720543	-1.52083	0.026063	0.634153	0.624727	85	tags=31%, list=12%, signal=28%	FSTL1/VSIG4/TIMP1/DDT
HP_RED_EYE	HP_RED_EYE	13	-0.721885	-1.52367	0.026063	0.634153	0.624727	96	tags=31%, list=13%, signal=27%	TKT/PSMB4/PSMB9/PSMB8
GRABARCZYK_BCL11B_TARGETS_UP	GRABARCZYK_BCL11B_TARGETS_UP	2	-0.96049	-1.33481	0.0262156	0.635453	0.626008	32	tags=100%, list=4%, signal=96%	TIMP1
GOBP_BONE_MORPHOGENESIS	GOBP_BONE_MORPHOGENESIS	3	-0.920273	-1.37355	0.0262212	0.635453	0.626008	60	tags=67%, list=8%, signal=61%	LTF/TSKU
HP_METAPHYSEAL_IRREGULARITY	HP_METAPHYSEAL_IRREGULARITY	3	-0.919903	-1.373	0.0262212	0.635453	0.626008	25	tags=67%, list=3%, signal=65%	COMP/MMP9
HP_X_LINKED_RECESSIVE_INHERITANCE	HP_X_LINKED_RECESSIVE_INHERITANCE	8	0.771375	1.59063	0.0263897	0.638687	0.629194	85	tags=50%, list=12%, signal=45%	FHL1/AIFM1/IGF2/MSN
GSE2770_IL12_VS_IL4_TREATED_ACT_CD4_TCELL_2H_DN	GSE2770_IL12_VS_IL4_TREATED_ACT_CD4_TCELL_2H_DN	7	-0.814387	-1.46682	0.026443	0.639128	0.629628	17	tags=57%, list=2%, signal=56%	WFDC2/TSKU/S100A8/S100A9
GSE6269_E_COLI_VS_STAPH_AUREUS_INF_PBMC_DN	GSE6269_E_COLI_VS_STAPH_AUREUS_INF_PBMC_DN	24	-0.640351	-1.50851	0.0266462	0.643183	0.633623	125	tags=38%, list=17%, signal=32%	CES1/ASL/PYGL/CTSD/MYO5A/ICAM1/MMP9/PTX3/S100A9
GOBP_RHO_PROTEIN_SIGNAL_TRANSDUCTION	GOBP_RHO_PROTEIN_SIGNAL_TRANSDUCTION	9	0.765297	1.63996	0.0267305	0.644365	0.634787	47	tags=33%, list=6%, signal=32%	CDH13/ARHGDIA/RAC1
GOBP_ERK1_AND_ERK2_CASCADE	GOBP_ERK1_AND_ERK2_CASCADE	20	-0.662	-1.50606	0.0268044	0.645292	0.6357	89	tags=25%, list=12%, signal=23%	CSF1R/PLA2G2A/ICAM1/DDT/CHI3L1
GOBP_NEGATIVE_REGULATION_OF_CYTOKINE_PRODUCTION	GOBP_NEGATIVE_REGULATION_OF_CYTOKINE_PRODUCTION	21	-0.646405	-1.48202	0.0268765	0.646172	0.636567	60	tags=33%, list=8%, signal=32%	SRGN/LTF/IL1RL1/VSIG4/TSKU/ELANE/SERPINB1
GOBP_MODULATION_BY_HOST_OF_SYMBIONT_MOLECULAR_FUNCTION	GOBP_MODULATION_BY_HOST_OF_SYMBIONT_MOLECULAR_FUNCTION	2	-0.960056	-1.3342	0.0270391	0.646664	0.637052	22	tags=100%, list=3%, signal=97%	PTX3
GOBP_MODULATION_OF_MOLECULAR_FUNCTION_IN_OTHER_ORGANISM	GOBP_MODULATION_OF_MOLECULAR_FUNCTION_IN_OTHER_ORGANISM	2	-0.960056	-1.3342	0.0270391	0.646664	0.637052	22	tags=100%, list=3%, signal=97%	PTX3
GOBP_NEGATIVE_REGULATION_BY_HOST_OF_SYMBIONT_MOLECULAR_FUNCTION	GOBP_NEGATIVE_REGULATION_BY_HOST_OF_SYMBIONT_MOLECULAR_FUNCTION	2	-0.960056	-1.3342	0.0270391	0.646664	0.637052	22	tags=100%, list=3%, signal=97%	PTX3
GOBP_NEGATIVE_REGULATION_OF_MOLECULAR_FUNCTION_IN_OTHER_ORGANISM	GOBP_NEGATIVE_REGULATION_OF_MOLECULAR_FUNCTION_IN_OTHER_ORGANISM	2	-0.960056	-1.3342	0.0270391	0.646664	0.637052	22	tags=100%, list=3%, signal=97%	PTX3
GOCC_ENDOPLASMIC_RETICULUM_GOLGI_INTERMEDIATE_COMPARTMENT_MEMBRANE	GOCC_ENDOPLASMIC_RETICULUM_GOLGI_INTERMEDIATE_COMPARTMENT_MEMBRANE	5	0.85375	1.54208	0.0271186	0.647132	0.637513	1	tags=20%, list=0%, signal=20%	CD59
WP_BLOOD_CLOTTING_CASCADE	WP_BLOOD_CLOTTING_CASCADE	16	0.637323	1.62247	0.0271298	0.647132	0.637513	50	tags=12%, list=7%, signal=12%	SERPINE1/F7
GSE2770_TGFB_AND_IL4_VS_IL12_TREATED_ACT_CD4_TCELL_48H_UP	GSE2770_TGFB_AND_IL4_VS_IL12_TREATED_ACT_CD4_TCELL_48H_UP	8	-0.786598	-1.48101	0.0271828	0.647548	0.637923	118	tags=50%, list=16%, signal=42%	PYGL/PEBP1/TKT/VSIG4
LEE_LIVER_CANCER_MYC_E2F1_DN	LEE_LIVER_CANCER_MYC_E2F1_DN	13	-0.719598	-1.51884	0.0273554	0.649715	0.640058	99	tags=38%, list=13%, signal=34%	FABP1/IGFBP2/REG1A/BHMT/ELANE
NABA_SECRETED_FACTORS	NABA_SECRETED_FACTORS	10	-0.760294	-1.50619	0.0273564	0.649715	0.640058	85	tags=40%, list=12%, signal=36%	FSTL1/S100A8/CSH2/S100A9
GOBP_CELL_CELL_SIGNALING_BY_WNT	GOBP_CELL_CELL_SIGNALING_BY_WNT	24	-0.639779	-1.50716	0.0274241	0.649715	0.640058	129	tags=58%, list=18%, signal=50%	PSMB3/PSMA2/PSMA4/PSMB4/IGFBP2/SDC1/PSMB9/PSMA1/IGFBP1/PSMA3/PSMA5/TSKU/PSMA7/PSMB8
GSE46025_WT_VS_FOXO1_KO_KLRG1_LOW_CD8_EFFECTOR_TCELL_UP	GSE46025_WT_VS_FOXO1_KO_KLRG1_LOW_CD8_EFFECTOR_TCELL_UP	7	-0.812954	-1.46424	0.0274504	0.649715	0.640058	3	tags=29%, list=0%, signal=29%	SERPINF1/SELENBP1
GOBP_LEUKOCYTE_TETHERING_OR_ROLLING	GOBP_LEUKOCYTE_TETHERING_OR_ROLLING	3	-0.918853	-1.37144	0.0275548	0.649715	0.640058	15	tags=67%, list=2%, signal=66%	VCAM1/ELANE
HP_APLASIA_HYPOPLASIA_OF_THE_SCAPULAE	HP_APLASIA_HYPOPLASIA_OF_THE_SCAPULAE	3	-0.917874	-1.36997	0.0275548	0.649715	0.640058	9	tags=67%, list=1%, signal=66%	ACTB/PSMB8
CHARAFE_BREAST_CANCER_LUMINAL_VS_BASAL_UP	CHARAFE_BREAST_CANCER_LUMINAL_VS_BASAL_UP	6	0.824289	1.56091	0.0275593	0.649715	0.640058	50	tags=33%, list=7%, signal=31%	HNRNPA2B1/F7
MCDOWELL_ACUTE_LUNG_INJURY_DN	MCDOWELL_ACUTE_LUNG_INJURY_DN	9	0.763665	1.63646	0.0275593	0.649715	0.640058	82	tags=44%, list=11%, signal=40%	CDH13/FHL1/ADH1B/RSU1
GSE32034_UNTREATED_VS_ROSIGLIZATONE_TREATED_LY6C_LOW_MONOCYTE_DN	GSE32034_UNTREATED_VS_ROSIGLIZATONE_TREATED_LY6C_LOW_MONOCYTE_DN	8	-0.785972	-1.47983	0.0276639	0.65075	0.641077	90	tags=25%, list=12%, signal=22%	CORO1A/OGN
GOBP_FC_EPSILON_RECEPTOR_SIGNALING_PATHWAY	GOBP_FC_EPSILON_RECEPTOR_SIGNALING_PATHWAY	25	-0.616188	-1.45841	0.0276747	0.65075	0.641077	129	tags=40%, list=18%, signal=34%	PSMB3/PSMA2/PSMA4/PSMB4/PSMB9/PSMA1/PSMA3/PSMA5/PSMA7/PSMB8
HOFT_CD4_POSITIVE_ALPHA_BETA_MEMORY_T_CELL_BCG_VACCINE_AGE_18_45YO_ID_7DY_TOP_100_DEG_EX_VIVO_DN	HOFT_CD4_POSITIVE_ALPHA_BETA_MEMORY_T_CELL_BCG_VACCINE_AGE_18_45YO_ID_7DY_TOP_100_DEG_EX_VIVO_DN	4	0.892737	1.48962	0.0279146	0.655542	0.645798	6	tags=25%, list=1%, signal=25%	CAPZA1
MIKKELSEN_MEF_ICP_WITH_H3K27ME3	MIKKELSEN_MEF_ICP_WITH_H3K27ME3	8	-0.785604	-1.47914	0.028145	0.657074	0.647307	105	tags=25%, list=14%, signal=22%	TYMP/CA3
GSE14308_TH2_VS_TH1_UP	GSE14308_TH2_VS_TH1_UP	6	-0.827961	-1.45772	0.0281745	0.657074	0.647307	94	tags=50%, list=13%, signal=44%	LSM1/TXN/PSMA3
GSE41867_MEMORY_VS_EXHAUSTED_CD8_TCELL_DAY30_LCMV_UP	GSE41867_MEMORY_VS_EXHAUSTED_CD8_TCELL_DAY30_LCMV_UP	6	-0.828345	-1.45839	0.0281745	0.657074	0.647307	28	tags=67%, list=4%, signal=65%	PRTN3/ICAM1/MPO/SERPINB1
GSE42021_TCONV_PLN_VS_CD24INT_TCONV_THYMUS_DN	GSE42021_TCONV_PLN_VS_CD24INT_TCONV_THYMUS_DN	13	-0.719074	-1.51773	0.0282169	0.657074	0.647307	143	tags=54%, list=19%, signal=44%	PDLIM1/KRT1/LCN2/ACTR3/LTF/CD93/ELANE
GOBP_RESPONSE_TO_INTERLEUKIN_12	GOBP_RESPONSE_TO_INTERLEUKIN_12	15	0.633576	1.59526	0.0282325	0.657074	0.647307	85	tags=33%, list=12%, signal=30%	CAPZA1/CNN2/HNRNPA2B1/HNRNPF/MSN
REACTOME_INTERLEUKIN_12_FAMILY_SIGNALING	REACTOME_INTERLEUKIN_12_FAMILY_SIGNALING	15	0.633576	1.59526	0.0282325	0.657074	0.647307	85	tags=33%, list=12%, signal=30%	CAPZA1/CNN2/HNRNPA2B1/HNRNPF/MSN
REACTOME_INTERLEUKIN_12_SIGNALING	REACTOME_INTERLEUKIN_12_SIGNALING	15	0.633576	1.59526	0.0282325	0.657074	0.647307	85	tags=33%, list=12%, signal=30%	CAPZA1/CNN2/HNRNPA2B1/HNRNPF/MSN
GOBP_POSITIVE_REGULATION_OF_DNA_BINDING_TRANSCRIPTION_FACTOR_ACTIVITY	GOBP_POSITIVE_REGULATION_OF_DNA_BINDING_TRANSCRIPTION_FACTOR_ACTIVITY	15	-0.699716	-1.49718	0.0284616	0.661559	0.651726	60	tags=60%, list=8%, signal=56%	UBC/PSMA6/HSPA1B/NPM1/LTF/DHX9/ICAM1/S100A8/S100A9
REACTOME_INTRACELLULAR_SIGNALING_BY_SECOND_MESSENGERS	REACTOME_INTRACELLULAR_SIGNALING_BY_SECOND_MESSENGERS	18	-0.665401	-1.46905	0.0285284	0.662266	0.652422	129	tags=61%, list=18%, signal=52%	PSMB3/PSMA2/PSMA4/PSMB4/PSMB9/PSMA1/IL1RL1/PSMA3/PSMA5/PSMA7/PSMB8
GOCC_SECRETORY_GRANULE	GOCC_SECRETORY_GRANULE	148	-0.443494	-1.31717	0.028754	0.665805	0.655908	154	tags=25%, list=21%, signal=25%	VNN1/HSPA1B/HSP90AB1/MMRN1/PRTN3/KRT1/DEFA3/PSMA2/FTH1/PYGL/SRGN/GPI/LCN2/ACTR2/SNCA/CTSD/CHGA/MYO5A/REG1A/LTF/GDI2/FTL/CD93/LTA4H/PLA2G2A/MPO/MMP9/PRG2/PTX3/TIMP1/PSMA5/S100A8/ELANE/B4GALT1/SERPINB1/CHI3L1/S100A9
GOCC_SECRETORY_VESICLE	GOCC_SECRETORY_VESICLE	148	-0.443494	-1.31717	0.028754	0.665805	0.655908	154	tags=25%, list=21%, signal=25%	VNN1/HSPA1B/HSP90AB1/MMRN1/PRTN3/KRT1/DEFA3/PSMA2/FTH1/PYGL/SRGN/GPI/LCN2/ACTR2/SNCA/CTSD/CHGA/MYO5A/REG1A/LTF/GDI2/FTL/CD93/LTA4H/PLA2G2A/MPO/MMP9/PRG2/PTX3/TIMP1/PSMA5/S100A8/ELANE/B4GALT1/SERPINB1/CHI3L1/S100A9
HP_ABNORMAL_CIRCULATING_GLOBULIN_LEVEL	HP_ABNORMAL_CIRCULATING_GLOBULIN_LEVEL	4	0.891301	1.48723	0.0290092	0.670025	0.660066	23	tags=25%, list=3%, signal=24%	SERPINE1
REACTOME_TRANSMISSION_ACROSS_CHEMICAL_SYNAPSES	REACTOME_TRANSMISSION_ACROSS_CHEMICAL_SYNAPSES	12	0.699321	1.59483	0.0290249	0.670025	0.660066	108	tags=42%, list=15%, signal=36%	TUBB8/TUBA8/RAC1/KPNA2/TUBA1C
HAHTOLA_SEZARY_SYNDROM_UP	HAHTOLA_SEZARY_SYNDROM_UP	13	-0.718199	-1.51589	0.0290785	0.670025	0.660066	129	tags=38%, list=18%, signal=32%	PSMB3/CES1/SNCA/MMP9/SELENBP1
HESS_TARGETS_OF_HOXA9_AND_MEIS1_DN	HESS_TARGETS_OF_HOXA9_AND_MEIS1_DN	10	-0.754879	-1.49546	0.029165	0.670025	0.660066	159	tags=60%, list=22%, signal=48%	VCAN/CDH1/LCN2/CSF1R/MMP9/MRC1
HP_ABNORMALITIES_OF_PLACENTA_OR_UMBILICAL_CORD	HP_ABNORMALITIES_OF_PLACENTA_OR_UMBILICAL_CORD	8	0.765193	1.57788	0.0291675	0.670025	0.660066	68	tags=38%, list=9%, signal=34%	SERPINE1/F7/IGF2
BLANCO_MELO_BETA_INTERFERON_TREATED_BRONCHIAL_EPITHELIAL_CELLS_DN	BLANCO_MELO_BETA_INTERFERON_TREATED_BRONCHIAL_EPITHELIAL_CELLS_DN	6	-0.825345	-1.45311	0.0291718	0.670025	0.660066	16	tags=50%, list=2%, signal=49%	KRT16/S100A8/S100A9
HP_ABNORMAL_THROMBOSIS	HP_ABNORMAL_THROMBOSIS	30	0.503446	1.48279	0.029194	0.670025	0.660066	59	tags=13%, list=8%, signal=13%	PRDX1/PRSS2/CPA1/PGM1
GSE18791_CTRL_VS_NEWCASTLE_VIRUS_DC_1H_DN	GSE18791_CTRL_VS_NEWCASTLE_VIRUS_DC_1H_DN	2	0.959323	1.36689	0.0292994	0.671599	0.661617	23	tags=50%, list=3%, signal=49%	SERPINE1
GSE17186_NAIVE_VS_CD21LOW_TRANSITIONAL_BCELL_CORD_BLOOD_UP	GSE17186_NAIVE_VS_CD21LOW_TRANSITIONAL_BCELL_CORD_BLOOD_UP	10	0.739428	1.62105	0.0294347	0.673851	0.663834	186	tags=80%, list=25%, signal=61%	RPLP2/LNPEP/ATP2A3/PFKP/ACY1/PGK1/PGLYRP2/TUBA4A
GSE28408_LY6G_POS_VS_NEG_DC_UP	GSE28408_LY6G_POS_VS_NEG_DC_UP	2	-0.957848	-1.33114	0.0295177	0.67482	0.66479	28	tags=100%, list=4%, signal=96%	ICAM1
GSE10240_IL22_VS_IL17_STIM_PRIMARY_BRONCHIAL_EPITHELIAL_CELLS_DN	GSE10240_IL22_VS_IL17_STIM_PRIMARY_BRONCHIAL_EPITHELIAL_CELLS_DN	8	-0.784158	-1.47641	0.0295883	0.67482	0.66479	104	tags=62%, list=14%, signal=54%	GPI/LCN2/OAF/ELANE/CHI3L1
GSE5099_UNSTIM_VS_MCSF_TREATED_MONOCYTE_DAY7_DN	GSE5099_UNSTIM_VS_MCSF_TREATED_MONOCYTE_DAY7_DN	8	-0.78329	-1.47478	0.0295883	0.67482	0.66479	2	tags=25%, list=0%, signal=25%	CD14/NUCB1
GOBP_CHRONIC_INFLAMMATORY_RESPONSE	GOBP_CHRONIC_INFLAMMATORY_RESPONSE	6	-0.824838	-1.45222	0.0296705	0.675003	0.66497	16	tags=50%, list=2%, signal=49%	VNN1/S100A8/S100A9
GSE34006_A2AR_KO_VS_A2AR_AGONIST_TREATED_TREG_UP	GSE34006_A2AR_KO_VS_A2AR_AGONIST_TREATED_TREG_UP	6	-0.82474	-1.45205	0.0296705	0.675003	0.66497	59	tags=50%, list=8%, signal=46%	HLA-B/PSMB9/PSMB8
GOMF_PEROXIREDOXIN_ACTIVITY	GOMF_PEROXIREDOXIN_ACTIVITY	4	0.890176	1.48535	0.029739	0.675718	0.665674	2	tags=25%, list=0%, signal=25%	PRDX1
GSE10325_BCELL_VS_LUPUS_BCELL_DN	GSE10325_BCELL_VS_LUPUS_BCELL_DN	13	-0.717525	-1.51446	0.0299401	0.679071	0.668977	110	tags=46%, list=15%, signal=40%	PSMA6/SRGN/LAP3/SDC1/PSMB9/PSMA5
GSE24972_WT_VS_IRF8_KO_MARGINAL_ZONE_SPLEEN_BCELL_DN	GSE24972_WT_VS_IRF8_KO_MARGINAL_ZONE_SPLEEN_BCELL_DN	8	0.764359	1.57616	0.0299612	0.679071	0.668977	63	tags=25%, list=9%, signal=23%	PRDX1/ADAMDEC1
REACTOME_TRANSLOCATION_OF_SLC2A4_GLUT4_TO_THE_PLASMA_MEMBRANE	REACTOME_TRANSLOCATION_OF_SLC2A4_GLUT4_TO_THE_PLASMA_MEMBRANE	20	0.587774	1.60578	0.0300971	0.681238	0.671112	55	tags=35%, list=7%, signal=33%	YWHAH/RAB11A/TUBB8/TUBA8/YWHAE/RAC1/LNPEP
GOBP_REGULATION_OF_REPRODUCTIVE_PROCESS	GOBP_REGULATION_OF_REPRODUCTIVE_PROCESS	6	-0.821834	-1.44693	0.0301691	0.681238	0.671112	21	tags=67%, list=3%, signal=65%	RETN/ARHGDIB/TIMP1/B4GALT1
GSE15330_HSC_VS_PRO_BCELL_UP	GSE15330_HSC_VS_PRO_BCELL_UP	6	-0.823102	-1.44916	0.0301691	0.681238	0.671112	2	tags=33%, list=0%, signal=34%	NAP1L1/NUCB1
GOBP_REGULATION_OF_TRIGLYCERIDE_METABOLIC_PROCESS	GOBP_REGULATION_OF_TRIGLYCERIDE_METABOLIC_PROCESS	7	-0.809539	-1.45809	0.0304723	0.685596	0.675405	42	tags=43%, list=6%, signal=41%	APOA4/APOC3/APOA5
GOBP_AMINOGLYCAN_CATABOLIC_PROCESS	GOBP_AMINOGLYCAN_CATABOLIC_PROCESS	8	-0.780073	-1.46872	0.0305505	0.685596	0.675405	65	tags=50%, list=9%, signal=46%	VCAN/SDC1/OGN/CHI3L1
GSE17721_CTRL_VS_PAM3CSK4_6H_BMDC_UP	GSE17721_CTRL_VS_PAM3CSK4_6H_BMDC_UP	8	-0.780465	-1.46946	0.0305505	0.685596	0.675405	82	tags=50%, list=11%, signal=45%	LAP3/CD93/SELENBP1/NUCB1
GSE39152_BRAIN_VS_SPLEEN_CD103_NEG_MEMORY_CD8_TCELL_DN	GSE39152_BRAIN_VS_SPLEEN_CD103_NEG_MEMORY_CD8_TCELL_DN	8	-0.779265	-1.4672	0.0305505	0.685596	0.675405	28	tags=50%, list=4%, signal=49%	SRGN/ICAM1/PSMA7/PSMB8
HP_FOCAL_DYSTONIA	HP_FOCAL_DYSTONIA	8	-0.779517	-1.46767	0.0305505	0.685596	0.675405	108	tags=50%, list=15%, signal=43%	COL6A3/HINT1/FTL/COL6A1
GSE2585_THYMIC_MACROPHAGE_VS_MTEC_DN	GSE2585_THYMIC_MACROPHAGE_VS_MTEC_DN	10	-0.751816	-1.48939	0.0309737	0.692584	0.682289	57	tags=40%, list=8%, signal=37%	PSMA1/LTA4H/MPO/SERPINB1
GSE2405_0H_VS_9H_A_PHAGOCYTOPHILUM_STIM_NEUTROPHIL_UP	GSE2405_0H_VS_9H_A_PHAGOCYTOPHILUM_STIM_NEUTROPHIL_UP	7	-0.808397	-1.45604	0.030976	0.692584	0.682289	96	tags=43%, list=13%, signal=38%	TKT/PSMA1/TXN
GSE45365_WT_VS_IFNAR_KO_BCELL_UP	GSE45365_WT_VS_IFNAR_KO_BCELL_UP	7	-0.808327	-1.45591	0.030976	0.692584	0.682289	16	tags=57%, list=2%, signal=56%	CALM2/TCP1/S100A8/NUCB1
MATZUK_SPERMATID_DIFFERENTIATION	MATZUK_SPERMATID_DIFFERENTIATION	1	-0.985034	-1.30351	0.0311371	0.695331	0.684995	13	tags=100%, list=2%, signal=98%
GOBP_REGULATION_OF_CELL_DEATH	GOBP_REGULATION_OF_CELL_DEATH	88	-0.487679	-1.37942	0.0313199	0.698475	0.688093	99	tags=33%, list=13%, signal=32%	PDIA3/SOD2/TCP1/P4HB/PCSK9/HYOU1/VNN1/HSPA1B/HSP90AB1/NPM1/GBE1/FABP1/CORO1A/CSF1R/FSTL1/SNCA/CTSD/CHGA/LTF/TXN/ACAA2/LGALS1/ICAM1/MPO/MMP9/TIMP1/S100A8/B4GALT1/S100A9
REACTOME_CHYLOMICRON_REMODELING	REACTOME_CHYLOMICRON_REMODELING	7	-0.807921	-1.45518	0.0314797	0.698475	0.688093	42	tags=57%, list=6%, signal=54%	APOB/APOA4/APOC3/APOA5
GSE34156_TLR1_TLR2_LIGAND_VS_NOD2_AND_TLR1_TLR2_LIGAND_24H_TREATED_MONOCYTE_UP	GSE34156_TLR1_TLR2_LIGAND_VS_NOD2_AND_TLR1_TLR2_LIGAND_24H_TREATED_MONOCYTE_UP	22	-0.641217	-1.48526	0.0314955	0.698475	0.688093	95	tags=36%, list=13%, signal=33%	ACTR2/CSF1R/CLIC1/CTSD/CD163/FTL/CD93/TIMP1
GSE42021_TREG_PLN_VS_CD24INT_TREG_THYMUS_DN	GSE42021_TREG_PLN_VS_CD24INT_TREG_THYMUS_DN	22	-0.640812	-1.48433	0.0314955	0.698475	0.688093	129	tags=36%, list=18%, signal=31%	PSMB3/TYMP/PSMA4/LAP3/PSMB9/PSMA3/PSMB8/NUCB1
REACTOME_INTEGRIN_CELL_SURFACE_INTERACTIONS	REACTOME_INTEGRIN_CELL_SURFACE_INTERACTIONS	22	-0.641575	-1.48609	0.0314955	0.698475	0.688093	173	tags=32%, list=24%, signal=25%	COL18A1/CDH1/COL6A3/TNC/SPP1/ICAM1/COL6A1
GOBP_SECRETION	GOBP_SECRETION	169	-0.430271	-1.292	0.0315457	0.698475	0.688093	157	tags=25%, list=21%, signal=25%	PTGDS/VNN1/HSPA1B/HSP90AB1/SAA1/MMRN1/PRTN3/KRT1/CES1/PSMA2/FTH1/PYGL/SRGN/GPI/GOT2/LCN2/ACTR2/CORO1A/SNCA/CTSD/SDC1/CHGA/LTF/SPP1/FBLN5/GDI2/FTL/CD93/LTA4H/PLA2G2A/MPO/MMP9/PRG2/PTX3/TIMP1/PSMA5/S100A8/ELANE/B4GALT1/SERPINB1/CHI3L1/S100A9
GOMF_OPSONIN_BINDING	GOMF_OPSONIN_BINDING	9	-0.794871	-1.53376	0.0316643	0.698475	0.688093	33	tags=44%, list=4%, signal=43%	CRP/CD93/VSIG4/PTX3
REACTOME_MUSCLE_CONTRACTION	REACTOME_MUSCLE_CONTRACTION	13	0.677198	1.58518	0.0317425	0.698475	0.688093	151	tags=62%, list=21%, signal=50%	CALD1/MYL1/ATP2A3/TPM2/ACTG2/MYL6/TPM1/ACTC1
PID_TOLL_ENDOGENOUS_PATHWAY	PID_TOLL_ENDOGENOUS_PATHWAY	5	-0.869969	-1.47162	0.0317992	0.698475	0.688093	16	tags=60%, list=2%, signal=59%	VCAN/S100A8/S100A9
REACTOME_SIGNALING_BY_WNT	REACTOME_SIGNALING_BY_WNT	18	-0.661473	-1.46038	0.0318601	0.698475	0.688093	129	tags=56%, list=18%, signal=47%	PSMB3/PSMA2/PSMA4/PSMB4/PSMB9/PSMA1/PSMA3/PSMA5/PSMA7/PSMB8
CHYLA_CBFA2T3_TARGETS_UP	CHYLA_CBFA2T3_TARGETS_UP	30	-0.596069	-1.45477	0.0318878	0.698475	0.688093	33	tags=47%, list=4%, signal=46%	IDH1/FABP5/FBP1/LCP1/SERPINA3/PGAM1/FCGR2A/LBP/ARHGDIB/PRTN3/CD93/PRG2/ELANE/SERPINB1
GOBP_CALCINEURIN_MEDIATED_SIGNALING	GOBP_CALCINEURIN_MEDIATED_SIGNALING	1	0.985034	1.29983	0.0318919	0.698475	0.688093	12	tags=100%, list=2%, signal=99%	PTBP1
GOBP_INOSITOL_PHOSPHATE_MEDIATED_SIGNALING	GOBP_INOSITOL_PHOSPHATE_MEDIATED_SIGNALING	1	0.985034	1.29983	0.0318919	0.698475	0.688093	12	tags=100%, list=2%, signal=99%	PTBP1
GOBP_POSITIVE_REGULATION_OF_CALCINEURIN_MEDIATED_SIGNALING	GOBP_POSITIVE_REGULATION_OF_CALCINEURIN_MEDIATED_SIGNALING	1	0.985034	1.29983	0.0318919	0.698475	0.688093	12	tags=100%, list=2%, signal=99%	PTBP1
GOBP_REGULATION_OF_CALCINEURIN_MEDIATED_SIGNALING	GOBP_REGULATION_OF_CALCINEURIN_MEDIATED_SIGNALING	1	0.985034	1.29983	0.0318919	0.698475	0.688093	12	tags=100%, list=2%, signal=99%	PTBP1
WP_MIR124_PREDICTED_INTERACTIONS_WITH_CELL_CYCLE_AND_DIFFERENTIATION	WP_MIR124_PREDICTED_INTERACTIONS_WITH_CELL_CYCLE_AND_DIFFERENTIATION	1	0.985034	1.29983	0.0318919	0.698475	0.688093	12	tags=100%, list=2%, signal=99%	PTBP1
GOBP_NON_CANONICAL_WNT_SIGNALING_PATHWAY	GOBP_NON_CANONICAL_WNT_SIGNALING_PATHWAY	15	-0.695271	-1.48767	0.0319377	0.698638	0.688254	129	tags=67%, list=18%, signal=56%	PSMB3/PSMA2/PSMA4/PSMB4/PSMB9/PSMA1/PSMA3/PSMA5/PSMA7/PSMB8
GSE17721_PAM3CSK4_VS_CPG_2H_BMDC_DN	GSE17721_PAM3CSK4_VS_CPG_2H_BMDC_DN	8	-0.778203	-1.4652	0.0319938	0.699023	0.688633	113	tags=50%, list=15%, signal=43%	REG3A/COL6A3/ICAM1/MMP9
GOBP_RESPONSE_TO_GRAVITY	GOBP_RESPONSE_TO_GRAVITY	2	0.958519	1.36575	0.0322457	0.701122	0.6907	21	tags=50%, list=3%, signal=49%	SPARC
HP_PROXIMAL_MUSCLE_WEAKNESS_IN_UPPER_LIMBS	HP_PROXIMAL_MUSCLE_WEAKNESS_IN_UPPER_LIMBS	2	0.95843	1.36562	0.0322457	0.701122	0.6907	24	tags=50%, list=3%, signal=49%	FHL1
HP_UPPER_LIMB_MUSCLE_WEAKNESS	HP_UPPER_LIMB_MUSCLE_WEAKNESS	2	0.95843	1.36562	0.0322457	0.701122	0.6907	24	tags=50%, list=3%, signal=49%	FHL1
ZHANG_RESPONSE_TO_IKK_INHIBITOR_AND_TNF_UP	ZHANG_RESPONSE_TO_IKK_INHIBITOR_AND_TNF_UP	5	-0.8681	-1.46846	0.032308	0.701122	0.6907	97	tags=80%, list=13%, signal=70%	OAF/ICAM1/PTX3/SERPINB1
KAECH_NAIVE_VS_MEMORY_CD8_TCELL_DN	KAECH_NAIVE_VS_MEMORY_CD8_TCELL_DN	15	-0.6946	-1.48623	0.0323723	0.701122	0.6907	74	tags=27%, list=10%, signal=24%	CTSD/TXN/LGALS1/NUCB1
KRIGE_RESPONSE_TO_TOSEDOSTAT_24HR_UP	KRIGE_RESPONSE_TO_TOSEDOSTAT_24HR_UP	29	-0.597888	-1.44932	0.0323834	0.701122	0.6907	63	tags=31%, list=9%, signal=30%	MYO5A/ACAA2/NUP214/PTGR1/LGALS1/S100A8/SERPINB1/CHI3L1/S100A9
REACTOME_NEUTROPHIL_DEGRANULATION	REACTOME_NEUTROPHIL_DEGRANULATION	94	-0.479263	-1.3691	0.0324022	0.701122	0.6907	154	tags=30%, list=21%, signal=27%	VNN1/HSPA1B/HSP90AB1/PRTN3/KRT1/PSMA2/FTH1/PYGL/GPI/LCN2/ACTR2/CTSD/LTF/GDI2/FTL/CD93/LTA4H/MPO/MMP9/PRG2/PTX3/PSMA5/S100A8/ELANE/B4GALT1/SERPINB1/CHI3L1/S100A9
GSE25088_ROSIGLITAZONE_VS_IL4_AND_ROSIGLITAZONE_STIM_STAT6_KO_MACROPHAGE_DAY10_DN	GSE25088_ROSIGLITAZONE_VS_IL4_AND_ROSIGLITAZONE_STIM_STAT6_KO_MACROPHAGE_DAY10_DN	20	-0.656736	-1.49408	0.0324474	0.701122	0.6907	114	tags=35%, list=15%, signal=30%	YWHAG/PSMB4/PSMB9/PSMA1/SPP1/TXN/PSMA3
GOCC_PROTEASOME_CORE_COMPLEX_ALPHA_SUBUNIT_COMPLEX	GOCC_PROTEASOME_CORE_COMPLEX_ALPHA_SUBUNIT_COMPLEX	7	-0.806547	-1.4527	0.032487	0.701122	0.6907	120	tags=86%, list=16%, signal=72%	PSMA2/PSMA4/PSMA1/PSMA3/PSMA5/PSMA7
GSE22886_NAIVE_CD8_TCELL_VS_NKCELL_DN	GSE22886_NAIVE_CD8_TCELL_VS_NKCELL_DN	13	-0.713629	-1.50624	0.0325248	0.701122	0.6907	131	tags=54%, list=18%, signal=45%	NCAM1/ASL/SRGN/LCN2/LASP1/LTF/S100A9
REACTOME_INTRA_GOLGI_AND_RETROGRADE_GOLGI_TO_ER_TRAFFIC	REACTOME_INTRA_GOLGI_AND_RETROGRADE_GOLGI_TO_ER_TRAFFIC	10	0.731247	1.60311	0.032533	0.701122	0.6907	45	tags=30%, list=6%, signal=29%	CAPZA1/TUBB8/TUBA8
GSE22140_HEALTHY_VS_ARTHRITIC_GERMFREE_MOUSE_CD4_TCELL_DN	GSE22140_HEALTHY_VS_ARTHRITIC_GERMFREE_MOUSE_CD4_TCELL_DN	28	-0.609	-1.46472	0.0325521	0.701122	0.6907	84	tags=29%, list=11%, signal=26%	CLIC1/CD163/LGALS1/ICAM1/VSIG4/PTX3/TIMP1/MRC1
HP_INCREASED_CIRCULATING_ANTIBODY_LEVEL	HP_INCREASED_CIRCULATING_ANTIBODY_LEVEL	9	-0.793015	-1.53018	0.0326024	0.701376	0.690951	133	tags=67%, list=18%, signal=55%	KRT1/PSMB4/PSMB9/ELANE/KRT9/PSMB8
GOMF_COMPLEMENT_COMPONENT_C1Q_COMPLEX_BINDING	GOMF_COMPLEMENT_COMPONENT_C1Q_COMPLEX_BINDING	6	-0.818157	-1.44046	0.0326624	0.701471	0.691045	33	tags=50%, list=4%, signal=48%	CRP/CD93/PTX3
WANG_TUMOR_INVASIVENESS_DN	WANG_TUMOR_INVASIVENESS_DN	22	-0.636941	-1.47536	0.0326839	0.701471	0.691045	95	tags=32%, list=13%, signal=29%	ACTR2/FSTL1/SPP1/GDI2/PTX3/B4GALT1/COL6A1
GSE14413_UNSTIM_VS_IFNB_STIM_RAW264_CELLS_DN	GSE14413_UNSTIM_VS_IFNB_STIM_RAW264_CELLS_DN	3	0.929286	1.45268	0.0327372	0.701479	0.691052	24	tags=33%, list=3%, signal=32%	FHL1
GSE17186_NAIVE_VS_CD21LOW_TRANSITIONAL_BCELL_DN	GSE17186_NAIVE_VS_CD21LOW_TRANSITIONAL_BCELL_DN	4	-0.893869	-1.4383	0.0327614	0.701479	0.691052	74	tags=75%, list=10%, signal=68%	CTSD/LGALS1/B4GALT1
GOBP_ENDOPLASMIC_RETICULUM_TO_GOLGI_VESICLE_MEDIATED_TRANSPORT	GOBP_ENDOPLASMIC_RETICULUM_TO_GOLGI_VESICLE_MEDIATED_TRANSPORT	16	0.628086	1.59896	0.0329243	0.703313	0.692859	65	tags=25%, list=9%, signal=23%	CD59/CAPZA1/F7/SPTA1
REACTOME_CILIUM_ASSEMBLY	REACTOME_CILIUM_ASSEMBLY	16	0.627679	1.59792	0.0329243	0.703313	0.692859	46	tags=31%, list=6%, signal=30%	RAB11A/TUBB8/CCT2/TUBA8/YWHAE
GOBP_EMBRYO_IMPLANTATION	GOBP_EMBRYO_IMPLANTATION	7	-0.80603	-1.45177	0.0329906	0.703904	0.693441	55	tags=71%, list=7%, signal=67%	IGFBP7/ARHGDIB/SPP1/MMP9/TIMP1
GSE15330_HSC_VS_GRANULOCYTE_MONOCYTE_PROGENITOR_UP	GSE15330_HSC_VS_GRANULOCYTE_MONOCYTE_PROGENITOR_UP	11	0.696146	1.55922	0.0331719	0.705796	0.695305	120	tags=64%, list=16%, signal=54%	HLA-C/CCT2/CPA1/RPS6/MSN/PDIA6/ZYX
GSE17721_PAM3CSK4_VS_CPG_8H_BMDC_DN	GSE17721_PAM3CSK4_VS_CPG_8H_BMDC_DN	10	-0.747106	-1.48006	0.0332345	0.705796	0.695305	63	tags=80%, list=9%, signal=74%	HLA-B/FABP4/LBP/UBC/MYO5A/CSRP1/PSMA5/PSMB8
GSE23568_ID3_KO_VS_WT_CD8_TCELL_DN	GSE23568_ID3_KO_VS_WT_CD8_TCELL_DN	10	-0.745262	-1.47641	0.0332345	0.705796	0.695305	63	tags=40%, list=9%, signal=37%	MYO5A/CD93/UGP2/SERPINB1
GSE44732_UNSTIM_VS_IL27_STIM_IMATURE_DC_DN	GSE44732_UNSTIM_VS_IL27_STIM_IMATURE_DC_DN	10	-0.747293	-1.48043	0.0332345	0.705796	0.695305	74	tags=40%, list=10%, signal=36%	CTSD/NUP214/S100A8/S100A9
GSE7568_IL4_VS_IL4_AND_TGFB_TREATED_MACROPHAGE_24H_UP	GSE7568_IL4_VS_IL4_AND_TGFB_TREATED_MACROPHAGE_24H_UP	6	-0.81757	-1.43943	0.0336597	0.713396	0.702792	75	tags=50%, list=10%, signal=45%	B2M/GOLM1/DDT
GOBP_CALCIUM_MEDIATED_SIGNALING	GOBP_CALCIUM_MEDIATED_SIGNALING	5	0.846291	1.52861	0.0336707	0.713396	0.702792	12	tags=40%, list=2%, signal=40%	CDH13/PTBP1
LIU_VAV3_PROSTATE_CARCINOGENESIS_DN	LIU_VAV3_PROSTATE_CARCINOGENESIS_DN	4	0.885978	1.47835	0.0337528	0.713475	0.70287	13	tags=25%, list=2%, signal=25%	PSAT1
WEST_ADRENOCORTICAL_TUMOR_MARKERS_DN	WEST_ADRENOCORTICAL_TUMOR_MARKERS_DN	4	0.885998	1.47838	0.0337528	0.713475	0.70287	29	tags=25%, list=4%, signal=24%	ADH1B
GOBP_RESPONSE_TO_UV	GOBP_RESPONSE_TO_UV	5	-0.86334	-1.46041	0.0338344	0.71354	0.702934	25	tags=80%, list=3%, signal=78%	NPM1/MMP9/TIMP1/ELANE
GSE30971_WBP7_HET_VS_KO_MACROPHAGE_2H_LPS_STIM_DN	GSE30971_WBP7_HET_VS_KO_MACROPHAGE_2H_LPS_STIM_DN	5	-0.865116	-1.46341	0.0338344	0.71354	0.702934	22	tags=80%, list=3%, signal=78%	ENPP2/PTX3/SERPINB1/CHI3L1
HP_DILATED_CARDIOMYOPATHY	HP_DILATED_CARDIOMYOPATHY	11	0.694043	1.55451	0.0340624	0.716707	0.706054	151	tags=45%, list=21%, signal=37%	FHL1/PGM1/TPM2/TPM1/ACTC1
GOBP_POSITIVE_REGULATION_OF_RESPONSE_TO_EXTERNAL_STIMULUS	GOBP_POSITIVE_REGULATION_OF_RESPONSE_TO_EXTERNAL_STIMULUS	49	-0.538619	-1.40743	0.0340633	0.716707	0.706054	102	tags=37%, list=14%, signal=34%	PSMB3/PSMA2/PSMA4/PSMB4/CSF1R/SNCA/PSMB9/PSMA1/DHX9/IL1RL1/PSMA3/PLA2G2A/DDT/PSMA5/S100A8/PSMA7/PSMB8/S100A9
GSE12366_GC_BCELL_VS_PLASMA_CELL_DN	GSE12366_GC_BCELL_VS_PLASMA_CELL_DN	7	0.813182	1.62942	0.0341695	0.716883	0.706227	7	tags=14%, list=1%, signal=14%	PI16
GSE19401_PAM2CSK4_VS_RETINOIC_ACID_AND_PAM2CSK4_STIM_FOLLICULAR_DC_DN	GSE19401_PAM2CSK4_VS_RETINOIC_ACID_AND_PAM2CSK4_STIM_FOLLICULAR_DC_DN	19	-0.651553	-1.45747	0.0341997	0.716883	0.706227	74	tags=32%, list=10%, signal=29%	CES1/CTSD/CD163/DAG1/MRC1/NUCB1
KRASNOSELSKAYA_ILF3_TARGETS_UP	KRASNOSELSKAYA_ILF3_TARGETS_UP	4	-0.891355	-1.43426	0.0342851	0.716883	0.706227	59	tags=50%, list=8%, signal=46%	PROS1/PSMB9
GSE16266_CTRL_VS_HEATSHOCK_AND_LPS_STIM_MEF_UP	GSE16266_CTRL_VS_HEATSHOCK_AND_LPS_STIM_MEF_UP	9	-0.790812	-1.52593	0.0344788	0.716883	0.706227	54	tags=67%, list=7%, signal=63%	TXN/PSMA3/UGP2/DDT/PSMA5/NUCB1
GOBP_REGULATION_OF_COAGULATION	GOBP_REGULATION_OF_COAGULATION	25	0.533626	1.52002	0.0345494	0.716883	0.706227	50	tags=8%, list=7%, signal=8%	SERPINE1/F7
GSE42021_TCONV_PLN_VS_CD24HI_TCONV_THYMUS_DN	GSE42021_TCONV_PLN_VS_CD24HI_TCONV_THYMUS_DN	4	-0.890159	-1.43233	0.034793	0.716883	0.706227	78	tags=75%, list=11%, signal=67%	MB/LASP1/SDC1
HP_PREMATURE_LOSS_OF_TEETH	HP_PREMATURE_LOSS_OF_TEETH	4	-0.889456	-1.4312	0.034793	0.716883	0.706227	15	tags=50%, list=2%, signal=49%	CAT/ELANE
KENNY_CTNNB1_TARGETS_UP	KENNY_CTNNB1_TARGETS_UP	4	-0.889394	-1.4311	0.034793	0.716883	0.706227	55	tags=50%, list=7%, signal=47%	SPP1/S100A8
RHEIN_ALL_GLUCOCORTICOID_THERAPY_UP	RHEIN_ALL_GLUCOCORTICOID_THERAPY_UP	4	-0.88894	-1.43037	0.034793	0.716883	0.706227	60	tags=75%, list=8%, signal=69%	CA1/LTF/S100A8
LEE_LIVER_CANCER_ACOX1_DN	LEE_LIVER_CANCER_ACOX1_DN	16	-0.67846	-1.48069	0.0348189	0.716883	0.706227	15	tags=44%, list=2%, signal=44%	HPD/RNASE4/MBL2/LIPC/ELANE/CA3/SELENBP1
REACTOME_BETA_CATENIN_INDEPENDENT_WNT_SIGNALING	REACTOME_BETA_CATENIN_INDEPENDENT_WNT_SIGNALING	16	-0.677998	-1.47968	0.0348189	0.716883	0.706227	129	tags=62%, list=18%, signal=53%	PSMB3/PSMA2/PSMA4/PSMB4/PSMB9/PSMA1/PSMA3/PSMA5/PSMA7/PSMB8
REACTOME_PCP_CE_PATHWAY	REACTOME_PCP_CE_PATHWAY	16	-0.677998	-1.47968	0.0348189	0.716883	0.706227	129	tags=62%, list=18%, signal=53%	PSMB3/PSMA2/PSMA4/PSMB4/PSMB9/PSMA1/PSMA3/PSMA5/PSMA7/PSMB8
GOBP_LIPID_LOCALIZATION	GOBP_LIPID_LOCALIZATION	44	-0.544284	-1.39586	0.0349563	0.716883	0.706227	213	tags=34%, list=29%, signal=26%	FABP4/RETN/LBP/PCSK9/CRP/SLC4A1/LIPC/FABP3/CES1/GOT2/FABP1/SPP1/APOA5/PLA2G2A/TSKU
GOCC_COATED_VESICLE	GOCC_COATED_VESICLE	21	0.579037	1.62392	0.0350825	0.716883	0.706227	94	tags=19%, list=13%, signal=17%	CD59/HLA-C/CLTC/RAB27B
CREIGHTON_ENDOCRINE_THERAPY_RESISTANCE_3	CREIGHTON_ENDOCRINE_THERAPY_RESISTANCE_3	28	-0.605198	-1.45557	0.0351562	0.716883	0.706227	119	tags=29%, list=16%, signal=25%	FTH1/WFDC2/LCN2/GOLM1/UGP2/SERPINB1/S100A9/SELENBP1
SERVITJA_ISLET_HNF1A_TARGETS_UP	SERVITJA_ISLET_HNF1A_TARGETS_UP	26	-0.607277	-1.44332	0.0354796	0.716883	0.706227	76	tags=27%, list=10%, signal=25%	SNCA/SDC1/MCAM/LGALS1/SPARCL1/SERPINB1/COL6A1
FOURATI_BLOOD_TWINRIX_AGE_25_83YO_RESPONDERS_VS_POOR_RESPONDERS_0DY_DN	FOURATI_BLOOD_TWINRIX_AGE_25_83YO_RESPONDERS_VS_POOR_RESPONDERS_0DY_DN	33	-0.578483	-1.43187	0.035533	0.716883	0.706227	170	tags=39%, list=23%, signal=32%	ADAM12/VCAN/HSPA1B/PRTN3/DEFA3/TYMP/LCN2/TKT/LTF/CD163/MPO/PTX3/ELANE
KRIGE_RESPONSE_TO_TOSEDOSTAT_6HR_UP	KRIGE_RESPONSE_TO_TOSEDOSTAT_6HR_UP	36	-0.570126	-1.42895	0.035533	0.716883	0.706227	63	tags=31%, list=9%, signal=29%	MYO5A/ACAA2/PTGR1/LGALS1/MPO/PRG2/S100A8/ELANE/SERPINB1/CHI3L1/S100A9
CADWELL_ATG16L1_TARGETS_UP	CADWELL_ATG16L1_TARGETS_UP	19	-0.648017	-1.44956	0.0355677	0.716883	0.706227	154	tags=32%, list=21%, signal=26%	VNN1/SAA1/SAA2/FABP1/CD163/CA3
GSE30971_WBP7_HET_VS_KO_MACROPHAGE_2H_LPS_STIM_UP	GSE30971_WBP7_HET_VS_KO_MACROPHAGE_2H_LPS_STIM_UP	14	-0.700225	-1.48867	0.0357654	0.716883	0.706227	55	tags=36%, list=7%, signal=34%	SPP1/ACAA2/VSIG4/MMP9/MRC1
GOBP_REGULATION_OF_GLIOGENESIS	GOBP_REGULATION_OF_GLIOGENESIS	2	-0.951656	-1.32253	0.0361384	0.716883	0.706227	35	tags=100%, list=5%, signal=96%	DAG1
GSE21063_CTRL_VS_ANTI_IGM_STIM_BCELL_NFATC1_KO_8H_UP	GSE21063_CTRL_VS_ANTI_IGM_STIM_BCELL_NFATC1_KO_8H_UP	2	-0.952039	-1.32306	0.0361384	0.716883	0.706227	25	tags=100%, list=3%, signal=97%	MMP9
REACTOME_BIOSYNTHESIS_OF_SPECIALIZED_PRORESOLVING_MEDIATORS_SPMS	REACTOME_BIOSYNTHESIS_OF_SPECIALIZED_PRORESOLVING_MEDIATORS_SPMS	2	-0.952316	-1.32345	0.0361384	0.716883	0.706227	38	tags=100%, list=5%, signal=95%	LTA4H
REACTOME_SYNTHESIS_OF_LEUKOTRIENES_LT_AND_EOXINS_EX	REACTOME_SYNTHESIS_OF_LEUKOTRIENES_LT_AND_EOXINS_EX	2	-0.952316	-1.32345	0.0361384	0.716883	0.706227	38	tags=100%, list=5%, signal=95%	LTA4H
GOBP_CYTOPLASMIC_TRANSLATIONAL_ELONGATION	GOBP_CYTOPLASMIC_TRANSLATIONAL_ELONGATION	1	0.982313	1.29623	0.036144	0.716883	0.706227	14	tags=100%, list=2%, signal=98%	RPLP2
GOBP_L_SERINE_BIOSYNTHETIC_PROCESS	GOBP_L_SERINE_BIOSYNTHETIC_PROCESS	1	0.983673	1.29803	0.036144	0.716883	0.706227	13	tags=100%, list=2%, signal=98%	PSAT1
GOBP_L_SERINE_METABOLIC_PROCESS	GOBP_L_SERINE_METABOLIC_PROCESS	1	0.983673	1.29803	0.036144	0.716883	0.706227	13	tags=100%, list=2%, signal=98%	PSAT1
GOBP_PYRIDINE_CONTAINING_COMPOUND_BIOSYNTHETIC_PROCESS	GOBP_PYRIDINE_CONTAINING_COMPOUND_BIOSYNTHETIC_PROCESS	1	0.983673	1.29803	0.036144	0.716883	0.706227	13	tags=100%, list=2%, signal=98%	PSAT1
GOBP_VITAMIN_B6_METABOLIC_PROCESS	GOBP_VITAMIN_B6_METABOLIC_PROCESS	1	0.983673	1.29803	0.036144	0.716883	0.706227	13	tags=100%, list=2%, signal=98%	PSAT1
HP_ABNORMAL_CIRCULATING_GLYCINE_CONCENTRATION	HP_ABNORMAL_CIRCULATING_GLYCINE_CONCENTRATION	1	0.983673	1.29803	0.036144	0.716883	0.706227	13	tags=100%, list=2%, signal=98%	PSAT1
HP_ABNORMAL_CIRCULATING_SERINE_CONCENTRATION	HP_ABNORMAL_CIRCULATING_SERINE_CONCENTRATION	1	0.983673	1.29803	0.036144	0.716883	0.706227	13	tags=100%, list=2%, signal=98%	PSAT1
HP_ABNORMAL_CIRCULATING_SERINE_FAMILY_AMINO_ACID_CONCENTRATION	HP_ABNORMAL_CIRCULATING_SERINE_FAMILY_AMINO_ACID_CONCENTRATION	1	0.983673	1.29803	0.036144	0.716883	0.706227	13	tags=100%, list=2%, signal=98%	PSAT1
HP_ABNORMAL_NASOLACRIMAL_SYSTEM_MORPHOLOGY	HP_ABNORMAL_NASOLACRIMAL_SYSTEM_MORPHOLOGY	1	0.983673	1.29803	0.036144	0.716883	0.706227	13	tags=100%, list=2%, signal=98%	PSAT1
HP_APLASIA_HYPOPLASIA_OF_THE_CEREBRAL_WHITE_MATTER	HP_APLASIA_HYPOPLASIA_OF_THE_CEREBRAL_WHITE_MATTER	1	0.983673	1.29803	0.036144	0.716883	0.706227	13	tags=100%, list=2%, signal=98%	PSAT1
HP_BILATERAL_TALIPES_EQUINOVARUS	HP_BILATERAL_TALIPES_EQUINOVARUS	1	0.983673	1.29803	0.036144	0.716883	0.706227	13	tags=100%, list=2%, signal=98%	PSAT1
HP_CEREBRAL_WHITE_MATTER_HYPOPLASIA	HP_CEREBRAL_WHITE_MATTER_HYPOPLASIA	1	0.983673	1.29803	0.036144	0.716883	0.706227	13	tags=100%, list=2%, signal=98%	PSAT1
HP_CONGENITAL_MICROCEPHALY	HP_CONGENITAL_MICROCEPHALY	1	0.983673	1.29803	0.036144	0.716883	0.706227	13	tags=100%, list=2%, signal=98%	PSAT1
HP_CYANOTIC_EPISODE	HP_CYANOTIC_EPISODE	1	0.983673	1.29803	0.036144	0.716883	0.706227	13	tags=100%, list=2%, signal=98%	PSAT1
HP_EEG_WITH_FOCAL_SHARP_WAVES	HP_EEG_WITH_FOCAL_SHARP_WAVES	1	0.983673	1.29803	0.036144	0.716883	0.706227	13	tags=100%, list=2%, signal=98%	PSAT1
HP_EEG_WITH_POLYSPIKE_WAVE_COMPLEXES	HP_EEG_WITH_POLYSPIKE_WAVE_COMPLEXES	1	0.983673	1.29803	0.036144	0.716883	0.706227	13	tags=100%, list=2%, signal=98%	PSAT1
HP_EEG_WITH_SPIKE_WAVE_COMPLEXES	HP_EEG_WITH_SPIKE_WAVE_COMPLEXES	1	0.983673	1.29803	0.036144	0.716883	0.706227	13	tags=100%, list=2%, signal=98%	PSAT1
HP_INAPPROPRIATE_CRYING	HP_INAPPROPRIATE_CRYING	1	0.983673	1.29803	0.036144	0.716883	0.706227	13	tags=100%, list=2%, signal=98%	PSAT1
HP_INFANTILE_AXIAL_HYPOTONIA	HP_INFANTILE_AXIAL_HYPOTONIA	1	0.983673	1.29803	0.036144	0.716883	0.706227	13	tags=100%, list=2%, signal=98%	PSAT1
HP_LARGE_HANDS	HP_LARGE_HANDS	1	0.983673	1.29803	0.036144	0.716883	0.706227	13	tags=100%, list=2%, signal=98%	PSAT1
HP_NASOGASTRIC_TUBE_FEEDING	HP_NASOGASTRIC_TUBE_FEEDING	1	0.983673	1.29803	0.036144	0.716883	0.706227	13	tags=100%, list=2%, signal=98%	PSAT1
HP_PAROXYSMAL_INVOLUNTARY_EYE_MOVEMENTS	HP_PAROXYSMAL_INVOLUNTARY_EYE_MOVEMENTS	1	0.983673	1.29803	0.036144	0.716883	0.706227	13	tags=100%, list=2%, signal=98%	PSAT1
HP_PROFOUND_GLOBAL_DEVELOPMENTAL_DELAY	HP_PROFOUND_GLOBAL_DEVELOPMENTAL_DELAY	1	0.983673	1.29803	0.036144	0.716883	0.706227	13	tags=100%, list=2%, signal=98%	PSAT1
HP_PTERYGIUM	HP_PTERYGIUM	1	0.983673	1.29803	0.036144	0.716883	0.706227	13	tags=100%, list=2%, signal=98%	PSAT1
REACTOME_SERINE_BIOSYNTHESIS	REACTOME_SERINE_BIOSYNTHESIS	1	0.983673	1.29803	0.036144	0.716883	0.706227	13	tags=100%, list=2%, signal=98%	PSAT1
GOBP_NEGATIVE_REGULATION_OF_CELL_CYCLE	GOBP_NEGATIVE_REGULATION_OF_CELL_CYCLE	20	-0.638711	-1.45308	0.036193	0.716883	0.706227	150	tags=65%, list=20%, signal=53%	PSMB5/HSP90AB1/NPM1/PSMB3/PSMA2/PSMA4/PSMB4/PSMB9/PSMA1/PSMA3/PSMA5/PSMA7/PSMB8
GOBP_REGULATION_OF_CYSTEINE_TYPE_ENDOPEPTIDASE_ACTIVITY	GOBP_REGULATION_OF_CYSTEINE_TYPE_ENDOPEPTIDASE_ACTIVITY	16	-0.674591	-1.47224	0.0362117	0.716883	0.706227	99	tags=50%, list=13%, signal=44%	FABP1/SNCA/CTSD/LTF/PSMB9/MMP9/S100A8/S100A9
REACTOME_MAPK6_MAPK4_SIGNALING	REACTOME_MAPK6_MAPK4_SIGNALING	16	-0.675003	-1.47314	0.0362117	0.716883	0.706227	129	tags=62%, list=18%, signal=53%	PSMB3/PSMA2/PSMA4/PSMB4/PSMB9/PSMA1/PSMA3/PSMA5/PSMA7/PSMB8
GOBP_REGULATION_OF_PROTEOLYSIS	GOBP_REGULATION_OF_PROTEOLYSIS	80	-0.488553	-1.36623	0.0362812	0.716883	0.706227	109	tags=19%, list=15%, signal=18%	PEBP1/COL6A3/WFDC2/FABP1/SNCA/CTSD/LTF/PSMB9/PSMA3/MMP9/TIMP1/S100A8/PSMB8/SERPINB1/S100A9
GSE10325_MYELOID_VS_LUPUS_MYELOID_DN	GSE10325_MYELOID_VS_LUPUS_MYELOID_DN	15	-0.688191	-1.47252	0.036283	0.716883	0.706227	117	tags=33%, list=16%, signal=29%	MT1X/LAP3/CTSD/TXN/NUCB1
TIEN_INTESTINE_PROBIOTICS_2HR_DN	TIEN_INTESTINE_PROBIOTICS_2HR_DN	4	0.883878	1.47484	0.0363071	0.716883	0.706227	22	tags=25%, list=3%, signal=24%	CALD1
FRASOR_RESPONSE_TO_ESTRADIOL_DN	FRASOR_RESPONSE_TO_ESTRADIOL_DN	4	-0.887236	-1.42763	0.0363168	0.716883	0.706227	78	tags=50%, list=11%, signal=45%	MB/SELENBP1
GSE25088_CTRL_VS_IL4_STIM_MACROPHAGE_DN	GSE25088_CTRL_VS_IL4_STIM_MACROPHAGE_DN	4	-0.886835	-1.42698	0.0363168	0.716883	0.706227	18	tags=50%, list=2%, signal=49%	PLXDC2/PSMA5
JISON_SICKLE_CELL_DISEASE_UP	JISON_SICKLE_CELL_DISEASE_UP	31	-0.586526	-1.44337	0.036478	0.718507	0.707827	105	tags=35%, list=14%, signal=32%	TYMP/CLIC1/PSMB9/TXN/PSMA3/MPO/VSIG4/TIMP1/ELANE/PSMB8/NUCB1
WANG_MLL_TARGETS	WANG_MLL_TARGETS	20	-0.649044	-1.47658	0.036478	0.718507	0.707827	43	tags=20%, list=6%, signal=19%	IL1RL1/UGP2/CHI3L1/COL6A1
GOBP_IRES_DEPENDENT_VIRAL_TRANSLATIONAL_INITIATION	GOBP_IRES_DEPENDENT_VIRAL_TRANSLATIONAL_INITIATION	2	0.956047	1.36223	0.0365176	0.718509	0.707829	12	tags=50%, list=2%, signal=49%	PTBP1
GOBP_REGULATION_OF_PROTEIN_LOCALIZATION_TO_SYNAPSE	GOBP_REGULATION_OF_PROTEIN_LOCALIZATION_TO_SYNAPSE	2	-0.951328	-1.32208	0.0366901	0.719907	0.709206	35	tags=100%, list=5%, signal=96%	DAG1
GOBP_REGULATION_OF_RECEPTOR_LOCALIZATION_TO_SYNAPSE	GOBP_REGULATION_OF_RECEPTOR_LOCALIZATION_TO_SYNAPSE	2	-0.951328	-1.32208	0.0366901	0.719907	0.709206	35	tags=100%, list=5%, signal=96%	DAG1
LINDVALL_IMMORTALIZED_BY_TERT_UP	LINDVALL_IMMORTALIZED_BY_TERT_UP	8	0.751937	1.55055	0.0367073	0.719907	0.709206	22	tags=25%, list=3%, signal=25%	ARPC1B/CALD1
HOEK_PBMC_INACTIVATED_INFLUENZA_ADULT_7DY_UP	HOEK_PBMC_INACTIVATED_INFLUENZA_ADULT_7DY_UP	12	0.686424	1.56542	0.0370479	0.725804	0.715016	93	tags=25%, list=13%, signal=22%	IGLV1-36/IGHV1-58/IGHV3-20
REACTOME_COPI_MEDIATED_ANTEROGRADE_TRANSPORT	REACTOME_COPI_MEDIATED_ANTEROGRADE_TRANSPORT	13	0.668484	1.56478	0.0371558	0.727135	0.716327	65	tags=38%, list=9%, signal=36%	CD59/CAPZA1/TUBB8/TUBA8/SPTA1
GSE22196_HEALTHY_VS_OBESE_MOUSE_SKIN_GAMMADELTA_TCELL_UP	GSE22196_HEALTHY_VS_OBESE_MOUSE_SKIN_GAMMADELTA_TCELL_UP	20	-0.647091	-1.47214	0.0372842	0.728082	0.717259	59	tags=20%, list=8%, signal=19%	PSMB9/MPO/CHI3L1/NUCB1
KEGG_SYSTEMIC_LUPUS_ERYTHEMATOSUS	KEGG_SYSTEMIC_LUPUS_ERYTHEMATOSUS	20	-0.647368	-1.47277	0.0372842	0.728082	0.717259	15	tags=55%, list=2%, signal=55%	C2/C4A/C1QC/C1R/C1S/C9/C5/C7/FCGR3A/FCGR2A/ELANE
GSE40184_HEALTHY_VS_HCV_INFECTED_DONOR_PBMC_DN	GSE40184_HEALTHY_VS_HCV_INFECTED_DONOR_PBMC_DN	11	-0.742136	-1.49233	0.0374813	0.729858	0.719009	152	tags=55%, list=21%, signal=44%	SLC4A1/PYGL/SRGN/GPI/SERPINB1/NUCB1
BIOCARTA_FIBRINOLYSIS_PATHWAY	BIOCARTA_FIBRINOLYSIS_PATHWAY	8	0.750762	1.54812	0.037501	0.729858	0.719009	23	tags=12%, list=3%, signal=12%	SERPINE1
REACTOME_GAMMA_CARBOXYLATION_HYPUSINE_FORMATION_AND_ARYLSULFATASE_ACTIVATION	REACTOME_GAMMA_CARBOXYLATION_HYPUSINE_FORMATION_AND_ARYLSULFATASE_ACTIVATION	9	0.745138	1.59676	0.0375054	0.729858	0.719009	114	tags=33%, list=15%, signal=29%	EEF2/F7/EIF5A
GSE13485_CTRL_VS_DAY7_YF17D_VACCINE_PBMC_DN	GSE13485_CTRL_VS_DAY7_YF17D_VACCINE_PBMC_DN	10	-0.74409	-1.47408	0.037594	0.729858	0.719009	105	tags=50%, list=14%, signal=43%	TYMP/PSMA4/LAP3/PSMB9/PSMB8
GSE46606_IRF4MID_VS_WT_CD40L_IL2_IL5_DAY3_STIMULATED_BCELL_DN	GSE46606_IRF4MID_VS_WT_CD40L_IL2_IL5_DAY3_STIMULATED_BCELL_DN	6	-0.813371	-1.43203	0.0376489	0.729858	0.719009	90	tags=50%, list=12%, signal=44%	CORO1A/DAG1/B4GALT1
REACTOME_SIGNALING_BY_INTERLEUKINS	REACTOME_SIGNALING_BY_INTERLEUKINS	49	-0.532457	-1.39132	0.0377129	0.729858	0.719009	200	tags=53%, list=27%, signal=41%	UBC/IGHE/SOD2/PSMA6/TCP1/P4HB/PSMB5/SAA1/PRTN3/PSMB3/PSMA2/PSMA4/LCN2/PSMB4/CSF1R/SDC1/PSMB9/PSMA1/IL1RL1/PSMA3/ICAM1/MMP9/TIMP1/PSMA5/PSMA7/PSMB8
CHESLER_BRAIN_QTL_TRANS	CHESLER_BRAIN_QTL_TRANS	2	0.954036	1.35936	0.0378335	0.729858	0.719009	1	tags=50%, list=0%, signal=50%	CD59
BIOCARTA_GRANULOCYTES_PATHWAY	BIOCARTA_GRANULOCYTES_PATHWAY	4	-0.884256	-1.42283	0.0378406	0.729858	0.719009	28	tags=75%, list=4%, signal=73%	ICAM2/C5/ICAM1
GSE16385_MONOCYTE_VS_MACROPHAGE_DN	GSE16385_MONOCYTE_VS_MACROPHAGE_DN	4	-0.882951	-1.42073	0.0378406	0.729858	0.719009	18	tags=50%, list=2%, signal=49%	FBLN1/PSMA5
RYAN_MANTLE_CELL_LYMPHOMA_NOTCH_DIRECT_UP	RYAN_MANTLE_CELL_LYMPHOMA_NOTCH_DIRECT_UP	4	-0.884447	-1.42314	0.0378406	0.729858	0.719009	28	tags=75%, list=4%, signal=73%	CAMP/ICAM1/B4GALT1
KAPOSI_LIVER_CANCER_MET_UP	KAPOSI_LIVER_CANCER_MET_UP	3	0.922299	1.44176	0.0378425	0.729858	0.719009	3	tags=33%, list=0%, signal=33%	ARPC1B
CASORELLI_ACUTE_PROMYELOCYTIC_LEUKEMIA_UP	CASORELLI_ACUTE_PROMYELOCYTIC_LEUKEMIA_UP	12	-0.722579	-1.49347	0.0379562	0.729858	0.719009	62	tags=42%, list=8%, signal=39%	IGFBP7/PTGDS/IGKV1D-13/PSMA1/TIMP1
GSE17721_POLYIC_VS_PAM3CSK4_8H_BMDC_UP	GSE17721_POLYIC_VS_PAM3CSK4_8H_BMDC_UP	12	-0.722357	-1.49301	0.0379562	0.729858	0.719009	58	tags=67%, list=8%, signal=62%	FABP4/UBC/VCAN/PDLIM1/CSRP1/SPP1/S100A8/SERPINB1
JAEGER_METASTASIS_DN	JAEGER_METASTASIS_DN	19	-0.643953	-1.44047	0.0383037	0.729858	0.719009	151	tags=47%, list=21%, signal=39%	CDH1/KRT16/ENPP2/KRT1/KRT31/SDC1/LTF/S100A8/S100A9
HP_CHRONIC_CONSTIPATION	HP_CHRONIC_CONSTIPATION	4	-0.881978	-1.41917	0.0383485	0.729858	0.719009	76	tags=75%, list=10%, signal=68%	SNCA/UGP2/PSMB8
HP_DILATION_OF_LATERAL_VENTRICLES	HP_DILATION_OF_LATERAL_VENTRICLES	4	0.881148	1.47028	0.0385036	0.729858	0.719009	91	tags=100%, list=12%, signal=88%	PSAT1/RAB11A/RAC1/CLTC
HP_SEVERE_MUSCULAR_HYPOTONIA	HP_SEVERE_MUSCULAR_HYPOTONIA	4	0.881148	1.47028	0.0385036	0.729858	0.719009	91	tags=100%, list=12%, signal=88%	RAB11A/MYL1/AIFM1/CLTC
PEDERSEN_TARGETS_OF_611CTF_ISOFORM_OF_ERBB2	PEDERSEN_TARGETS_OF_611CTF_ISOFORM_OF_ERBB2	4	0.881319	1.47057	0.0385036	0.729858	0.719009	1	tags=25%, list=0%, signal=25%	CD59
GSE7400_CTRL_VS_CSF3_IN_VIVO_TREATED_PBMC_UP	GSE7400_CTRL_VS_CSF3_IN_VIVO_TREATED_PBMC_UP	11	0.687604	1.54008	0.038515	0.729858	0.719009	122	tags=55%, list=17%, signal=46%	DCXR/SPARC/CCT2/MATR3/RAB27B/SNRPE
GSE14415_FOXP3_KO_NATURAL_TREG_VS_TCONV_UP	GSE14415_FOXP3_KO_NATURAL_TREG_VS_TCONV_UP	3	0.921523	1.44055	0.0385243	0.729858	0.719009	14	tags=33%, list=2%, signal=33%	RPLP2
GSE41176_UNSTIM_VS_ANTI_IGM_STIM_BCELL_6H_UP	GSE41176_UNSTIM_VS_ANTI_IGM_STIM_BCELL_6H_UP	7	-0.802361	-1.44516	0.038531	0.729858	0.719009	26	tags=43%, list=4%, signal=42%	NRP1/VSIG4/MRC1
GSE17186_BLOOD_VS_CORD_BLOOD_NAIVE_BCELL_UP	GSE17186_BLOOD_VS_CORD_BLOOD_NAIVE_BCELL_UP	14	-0.698676	-1.48538	0.0386266	0.729858	0.719009	114	tags=50%, list=15%, signal=43%	YWHAG/SRGN/HINT1/ACTR3/PSMA3/PSMA7/NUCB1
GOBP_CELL_ACTIVATION	GOBP_CELL_ACTIVATION	197	-0.419403	-1.26829	0.0386625	0.729858	0.719009	104	tags=17%, list=14%, signal=20%	GPI/LCN2/ACTR2/CORO1A/CLIC1/SNCA/CTSD/IGFBP2/CHGA/LTF/CSRP1/GDI2/IL1RL1/IGHV3-16/FTL/IGHA2/CD93/LGALS1/LTA4H/PLA2G2A/ICAM1/MPO/VSIG4/MMP9/PRG2/PTX3/TIMP1/PSMA5/S100A8/ELANE/B4GALT1/SERPINB1/CHI3L1/S100A9
CHEOK_RESPONSE_TO_MERCAPTOPURINE_DN	CHEOK_RESPONSE_TO_MERCAPTOPURINE_DN	2	-0.949622	-1.3197	0.038897	0.729858	0.719009	14	tags=100%, list=2%, signal=98%	CA3
GOBP_REGULATION_OF_RELEASE_OF_CYTOCHROME_C_FROM_MITOCHONDRIA	GOBP_REGULATION_OF_RELEASE_OF_CYTOCHROME_C_FROM_MITOCHONDRIA	2	-0.950338	-1.3207	0.038897	0.729858	0.719009	25	tags=100%, list=3%, signal=97%	MMP9
NAKAYA_PBMC_FLUMIST_AGE_18_50YO_3DY_DN	NAKAYA_PBMC_FLUMIST_AGE_18_50YO_3DY_DN	7	0.806889	1.61681	0.038979	0.729858	0.719009	6	tags=29%, list=1%, signal=29%	CD59/CAPZA1
GOBP_CHEMOKINE_PRODUCTION	GOBP_CHEMOKINE_PRODUCTION	11	-0.739952	-1.48794	0.0389805	0.729858	0.719009	89	tags=45%, list=12%, signal=41%	CSF1R/IL1RL1/S100A8/ELANE/S100A9
HP_RECURRENT_FEVER	HP_RECURRENT_FEVER	7	-0.801567	-1.44373	0.0390346	0.729858	0.719009	93	tags=57%, list=13%, signal=50%	PSMB4/PSMB9/ELANE/PSMB8
DAZARD_RESPONSE_TO_UV_NHEK_UP	DAZARD_RESPONSE_TO_UV_NHEK_UP	23	-0.618218	-1.44463	0.0390625	0.729858	0.719009	105	tags=35%, list=14%, signal=31%	TYMP/GPI/RPS2/CSRP1/TXN/IL1RL1/S100A9/NUCB1
GSE360_CTRL_VS_T_GONDII_MAC_UP	GSE360_CTRL_VS_T_GONDII_MAC_UP	9	-0.782674	-1.51022	0.0391697	0.729858	0.719009	46	tags=33%, list=6%, signal=32%	CD163/LTA4H/VSIG4
GOBP_REGULATION_OF_MAPK_CASCADE	GOBP_REGULATION_OF_MAPK_CASCADE	38	-0.56137	-1.41655	0.0392902	0.729858	0.719009	35	tags=29%, list=5%, signal=29%	NRP1/IGFBP4/SAA1/PEBP1/CSF1R/DAG1/PLA2G2A/ICAM1/DDT/ELANE/CHI3L1
GSE19888_ADENOSINE_A3R_INH_VS_TCELL_MEMBRANES_ACT_MAST_CELL_UP	GSE19888_ADENOSINE_A3R_INH_VS_TCELL_MEMBRANES_ACT_MAST_CELL_UP	4	-0.880918	-1.41746	0.0393643	0.729858	0.719009	59	tags=75%, list=8%, signal=69%	FCGR3A/PSMB9/PSMB8
GSE360_LOW_DOSE_B_MALAYI_VS_M_TUBERCULOSIS_DC_DN	GSE360_LOW_DOSE_B_MALAYI_VS_M_TUBERCULOSIS_DC_DN	24	-0.619892	-1.46031	0.0394828	0.729858	0.719009	117	tags=38%, list=16%, signal=33%	MT1X/TYMP/TXN/CD163/PSMA3/ICAM1/MMP9/S100A8/S100A9
GSE34515_CD16_NEG_VS_POS_MONOCYTE_UP	GSE34515_CD16_NEG_VS_POS_MONOCYTE_UP	11	0.681215	1.52577	0.0398507	0.729858	0.719009	74	tags=18%, list=10%, signal=17%	NT5DC3/PFKP
GOBP_RESPONSE_TO_BACTERIUM	GOBP_RESPONSE_TO_BACTERIUM	97	-0.470805	-1.34878	0.0398671	0.729858	0.719009	130	tags=20%, list=18%, signal=19%	CPS1/DEFA3/PYGL/WFDC2/LCN2/SNCA/CHGA/LTF/IGHV3-16/IGHA2/PLA2G2A/ICAM1/MPO/PRG2/S100A8/ELANE/CA3/MRC1/S100A9
BENPORATH_PROLIFERATION	BENPORATH_PROLIFERATION	8	-0.775215	-1.45957	0.04	0.729858	0.719009	93	tags=50%, list=13%, signal=44%	PSMB4/GDI2/PSMA3/S100A9
GOCC_SARCOLEMMA	GOCC_SARCOLEMMA	8	-0.775698	-1.46048	0.04	0.729858	0.719009	108	tags=50%, list=15%, signal=43%	COL6A3/GOT2/DAG1/COL6A1
GSE9239_CTRL_VS_TNF_INHIBITOR_TREATED_DC_UP	GSE9239_CTRL_VS_TNF_INHIBITOR_TREATED_DC_UP	8	-0.775052	-1.45927	0.04	0.729858	0.719009	2	tags=25%, list=0%, signal=25%	VASP/NUCB1
HP_ABNORMAL_HDL_CHOLESTEROL_CONCENTRATION	HP_ABNORMAL_HDL_CHOLESTEROL_CONCENTRATION	8	-0.775594	-1.46029	0.04	0.729858	0.719009	42	tags=38%, list=6%, signal=36%	LIPC/APOA5/PSMB8
GHANDHI_DIRECT_IRRADIATION_DN	GHANDHI_DIRECT_IRRADIATION_DN	1	-0.982313	-1.29991	0.0400331	0.729858	0.719009	15	tags=100%, list=2%, signal=98%
GOBP_ANTIBACTERIAL_PEPTIDE_PRODUCTION	GOBP_ANTIBACTERIAL_PEPTIDE_PRODUCTION	1	-0.982313	-1.29991	0.0400331	0.729858	0.719009	15	tags=100%, list=2%, signal=98%
GOBP_ANTIMICROBIAL_PEPTIDE_PRODUCTION	GOBP_ANTIMICROBIAL_PEPTIDE_PRODUCTION	1	-0.982313	-1.29991	0.0400331	0.729858	0.719009	15	tags=100%, list=2%, signal=98%
GOBP_NEGATIVE_REGULATION_OF_INTERLEUKIN_8_PRODUCTION	GOBP_NEGATIVE_REGULATION_OF_INTERLEUKIN_8_PRODUCTION	1	-0.982313	-1.29991	0.0400331	0.729858	0.719009	15	tags=100%, list=2%, signal=98%
GOBP_POSITIVE_REGULATION_OF_LEUKOCYTE_TETHERING_OR_ROLLING	GOBP_POSITIVE_REGULATION_OF_LEUKOCYTE_TETHERING_OR_ROLLING	1	-0.982313	-1.29991	0.0400331	0.729858	0.719009	15	tags=100%, list=2%, signal=98%
GOBP_REGULATION_OF_LEUKOCYTE_TETHERING_OR_ROLLING	GOBP_REGULATION_OF_LEUKOCYTE_TETHERING_OR_ROLLING	1	-0.982313	-1.29991	0.0400331	0.729858	0.719009	15	tags=100%, list=2%, signal=98%
GSE22611_NOD2_TRANSD_VS_CTRL_TRANSD_HEK293_MDP_STIM_2H_DN	GSE22611_NOD2_TRANSD_VS_CTRL_TRANSD_HEK293_MDP_STIM_2H_DN	1	-0.982313	-1.29991	0.0400331	0.729858	0.719009	15	tags=100%, list=2%, signal=98%
HP_ABNORMALITY_OF_THE_TONSILS	HP_ABNORMALITY_OF_THE_TONSILS	1	-0.982313	-1.29991	0.0400331	0.729858	0.719009	15	tags=100%, list=2%, signal=98%
HP_ABNORMAL_EOSINOPHIL_MORPHOLOGY	HP_ABNORMAL_EOSINOPHIL_MORPHOLOGY	1	-0.982313	-1.29991	0.0400331	0.729858	0.719009	15	tags=100%, list=2%, signal=98%
HP_ABNORMAL_MONOCYTE_MORPHOLOGY	HP_ABNORMAL_MONOCYTE_MORPHOLOGY	1	-0.982313	-1.29991	0.0400331	0.729858	0.719009	15	tags=100%, list=2%, signal=98%
HP_APLASTIC_ANEMIA	HP_APLASTIC_ANEMIA	1	-0.982313	-1.29991	0.0400331	0.729858	0.719009	15	tags=100%, list=2%, signal=98%
HP_BLOODSTREAM_INFECTIOUS_AGENT	HP_BLOODSTREAM_INFECTIOUS_AGENT	1	-0.982313	-1.29991	0.0400331	0.729858	0.719009	15	tags=100%, list=2%, signal=98%
HP_CERVICAL_LYMPHADENOPATHY	HP_CERVICAL_LYMPHADENOPATHY	1	-0.982313	-1.29991	0.0400331	0.729858	0.719009	15	tags=100%, list=2%, signal=98%
HP_CUTANEOUS_ABSCESS	HP_CUTANEOUS_ABSCESS	1	-0.982313	-1.29991	0.0400331	0.729858	0.719009	15	tags=100%, list=2%, signal=98%
HP_MONOCYTOSIS	HP_MONOCYTOSIS	1	-0.982313	-1.29991	0.0400331	0.729858	0.719009	15	tags=100%, list=2%, signal=98%
HP_PERIANAL_ABSCESS	HP_PERIANAL_ABSCESS	1	-0.982313	-1.29991	0.0400331	0.729858	0.719009	15	tags=100%, list=2%, signal=98%
HP_PHARYNGITIS	HP_PHARYNGITIS	1	-0.982313	-1.29991	0.0400331	0.729858	0.719009	15	tags=100%, list=2%, signal=98%
HP_RECURRENT_EAR_INFECTIONS	HP_RECURRENT_EAR_INFECTIONS	1	-0.982313	-1.29991	0.0400331	0.729858	0.719009	15	tags=100%, list=2%, signal=98%
HP_RECURRENT_INFECTION_OF_THE_GASTROINTESTINAL_TRACT	HP_RECURRENT_INFECTION_OF_THE_GASTROINTESTINAL_TRACT	1	-0.982313	-1.29991	0.0400331	0.729858	0.719009	15	tags=100%, list=2%, signal=98%
HP_RECURRENT_TONSILLITIS	HP_RECURRENT_TONSILLITIS	1	-0.982313	-1.29991	0.0400331	0.729858	0.719009	15	tags=100%, list=2%, signal=98%
HP_SEVERE_INFECTION	HP_SEVERE_INFECTION	1	-0.982313	-1.29991	0.0400331	0.729858	0.719009	15	tags=100%, list=2%, signal=98%
HP_TOOTH_ABSCESS	HP_TOOTH_ABSCESS	1	-0.982313	-1.29991	0.0400331	0.729858	0.719009	15	tags=100%, list=2%, signal=98%
REACTOME_PYROPTOSIS	REACTOME_PYROPTOSIS	1	-0.982313	-1.29991	0.0400331	0.729858	0.719009	15	tags=100%, list=2%, signal=98%
WP_HAIR_FOLLICLE_DEVELOPMENT_CYTODIFFERENTIATION_PART_3_OF_3	WP_HAIR_FOLLICLE_DEVELOPMENT_CYTODIFFERENTIATION_PART_3_OF_3	1	-0.982313	-1.29991	0.0400331	0.729858	0.719009	15	tags=100%, list=2%, signal=98%
GOBP_KILLING_OF_CELLS_OF_OTHER_ORGANISM	GOBP_KILLING_OF_CELLS_OF_OTHER_ORGANISM	14	-0.694598	-1.47671	0.0400572	0.729858	0.719009	126	tags=29%, list=17%, signal=24%	DEFA3/CHGA/LTF/ELANE
RIGGI_EWING_SARCOMA_PROGENITOR_UP	RIGGI_EWING_SARCOMA_PROGENITOR_UP	24	-0.607391	-1.43086	0.0401035	0.729858	0.719009	157	tags=46%, list=21%, signal=37%	PTGDS/PDLIM1/CES1/SORD/MROH2A/IGFBP2/TNC/SPP1/MCAM/ICAM1/MMP9
GSE24634_NAIVE_CD4_TCELL_VS_DAY5_IL4_CONV_TREG_DN	GSE24634_NAIVE_CD4_TCELL_VS_DAY5_IL4_CONV_TREG_DN	13	0.661549	1.54855	0.0401086	0.729858	0.719009	111	tags=38%, list=15%, signal=33%	CAPZA1/CCT2/BLVRB/PHB/G3BP1
GSE3337_CTRL_VS_4H_IFNG_IN_CD8POS_DC_DN	GSE3337_CTRL_VS_4H_IFNG_IN_CD8POS_DC_DN	13	-0.708683	-1.4958	0.0401146	0.729858	0.719009	59	tags=23%, list=8%, signal=22%	PSMB9/PSMB8/SERPINB1
PID_INTEGRIN3_PATHWAY	PID_INTEGRIN3_PATHWAY	13	-0.706985	-1.49222	0.0401146	0.729858	0.719009	67	tags=31%, list=9%, signal=28%	PVR/TNC/SDC1/SPP1
GOMF_HYDROLASE_ACTIVITY_ACTING_ON_GLYCOSYL_BONDS	GOMF_HYDROLASE_ACTIVITY_ACTING_ON_GLYCOSYL_BONDS	6	-0.811944	-1.42952	0.0401422	0.729858	0.719009	132	tags=67%, list=18%, signal=55%	GBE1/GANAB/IL1RL1/AMY1A
GOBP_CELLULAR_ION_HOMEOSTASIS	GOBP_CELLULAR_ION_HOMEOSTASIS	31	-0.58014	-1.42766	0.0402516	0.731116	0.720249	152	tags=39%, list=21%, signal=32%	SLC4A1/SAA1/FTH1/MT1X/LCN2/CORO1A/SNCA/LTF/FTL/S100A8/ELANE/S100A9
GSE2405_HEAT_KILLED_LYSATE_VS_LIVE_A_PHAGOCYTOPHILUM_STIM_NEUTROPHIL_24H_UP	GSE2405_HEAT_KILLED_LYSATE_VS_LIVE_A_PHAGOCYTOPHILUM_STIM_NEUTROPHIL_24H_UP	23	-0.617118	-1.44205	0.0403646	0.731737	0.72086	153	tags=35%, list=21%, signal=28%	HSPA1B/CDH1/SRGN/WFDC2/CSF1R/ICAM1/MMP9/SERPINB1
REACTOME_COPI_INDEPENDENT_GOLGI_TO_ER_RETROGRADE_TRAFFIC	REACTOME_COPI_INDEPENDENT_GOLGI_TO_ER_RETROGRADE_TRAFFIC	9	0.738137	1.58176	0.0404064	0.731737	0.72086	45	tags=33%, list=6%, signal=32%	CAPZA1/TUBB8/TUBA8
REACTOME_GOLGI_TO_ER_RETROGRADE_TRANSPORT	REACTOME_GOLGI_TO_ER_RETROGRADE_TRANSPORT	9	0.738137	1.58176	0.0404064	0.731737	0.72086	45	tags=33%, list=6%, signal=32%	CAPZA1/TUBB8/TUBA8
GOBP_POSITIVE_REGULATION_OF_PHAGOCYTOSIS	GOBP_POSITIVE_REGULATION_OF_PHAGOCYTOSIS	11	-0.736974	-1.48195	0.0404798	0.731979	0.721099	22	tags=18%, list=3%, signal=18%	LMAN2/PTX3
GSE40274_CTRL_VS_LEF1_TRANSDUCED_ACTIVATED_CD4_TCELL_UP	GSE40274_CTRL_VS_LEF1_TRANSDUCED_ACTIVATED_CD4_TCELL_UP	10	0.720385	1.5793	0.0405002	0.731979	0.721099	82	tags=40%, list=11%, signal=36%	PI16/ILK/SLC2A3/RSU1
GSE17721_0.5H_VS_4H_CPG_BMDC_DN	GSE17721_0.5H_VS_4H_CPG_BMDC_DN	7	-0.80059	-1.44197	0.0405456	0.732074	0.721192	82	tags=43%, list=11%, signal=38%	FCGR3A/LAP3/ICAM1
NAKAYAMA_SOFT_TISSUE_TUMORS_PCA1_UP	NAKAYAMA_SOFT_TISSUE_TUMORS_PCA1_UP	30	-0.588601	-1.43655	0.0408163	0.735596	0.724662	89	tags=17%, list=12%, signal=15%	CSF1R/CD163/VSIG4/TIMP1/MRC1
CHIANG_LIVER_CANCER_SUBCLASS_PROLIFERATION_UP	CHIANG_LIVER_CANCER_SUBCLASS_PROLIFERATION_UP	4	-0.878748	-1.41397	0.0408881	0.735596	0.724662	25	tags=50%, list=3%, signal=49%	PKM/MMP9
GOBP_LEUKOCYTE_AGGREGATION	GOBP_LEUKOCYTE_AGGREGATION	4	-0.87971	-1.41552	0.0408881	0.735596	0.724662	16	tags=50%, list=2%, signal=49%	S100A8/S100A9
REACTOME_ACTIVATION_OF_NMDA_RECEPTORS_AND_POSTSYNAPTIC_EVENTS	REACTOME_ACTIVATION_OF_NMDA_RECEPTORS_AND_POSTSYNAPTIC_EVENTS	10	0.720248	1.579	0.0409428	0.735596	0.724662	108	tags=50%, list=15%, signal=43%	TUBB8/TUBA8/RAC1/KPNA2/TUBA1C
REACTOME_NEUROTRANSMITTER_RECEPTORS_AND_POSTSYNAPTIC_SIGNAL_TRANSMISSION	REACTOME_NEUROTRANSMITTER_RECEPTORS_AND_POSTSYNAPTIC_SIGNAL_TRANSMISSION	10	0.720248	1.579	0.0409428	0.735596	0.724662	108	tags=50%, list=15%, signal=43%	TUBB8/TUBA8/RAC1/KPNA2/TUBA1C
WP_COMPLEMENT_AND_COAGULATION_CASCADES	WP_COMPLEMENT_AND_COAGULATION_CASCADES	42	0.42951	1.37757	0.0410334	0.736496	0.725549	129	tags=10%, list=18%, signal=8%	SERPINE1/F7/CLTC/SERPINA5
MARTORIATI_MDM4_TARGETS_NEUROEPITHELIUM_UP	MARTORIATI_MDM4_TARGETS_NEUROEPITHELIUM_UP	19	0.563064	1.52987	0.0411283	0.737473	0.726511	74	tags=37%, list=10%, signal=34%	DCXR/CALD1/AK1/LNPEP/PGM1/SLC2A3/PFKP
GSE9006_HEALTHY_VS_TYPE_1_DIABETES_PBMC_AT_DX_DN	GSE9006_HEALTHY_VS_TYPE_1_DIABETES_PBMC_AT_DX_DN	6	-0.810388	-1.42678	0.0414594	0.742457	0.731421	90	tags=33%, list=12%, signal=29%	CORO1A/S100A8
BERTUCCI_MEDULLARY_VS_DUCTAL_BREAST_CANCER_UP	BERTUCCI_MEDULLARY_VS_DUCTAL_BREAST_CANCER_UP	14	-0.693517	-1.47441	0.0414878	0.742457	0.731421	110	tags=50%, list=15%, signal=43%	SRGN/TYMP/LAP3/PSMB9/ICAM1/PSMA5/PSMB8
BURTON_ADIPOGENESIS_6	BURTON_ADIPOGENESIS_6	28	-0.594204	-1.42913	0.0416667	0.744925	0.733852	132	tags=39%, list=18%, signal=34%	RETN/FAH/GPD1/GSR/GBE1/LCN2/TKT/ACAA2/DDT/S100A8/CA3
GSE29164_UNTREATED_VS_CD8_TCELL_TREATED_MELANOMA_DAY7_UP	GSE29164_UNTREATED_VS_CD8_TCELL_TREATED_MELANOMA_DAY7_UP	17	-0.672126	-1.47174	0.0417246	0.745229	0.734152	89	tags=47%, list=12%, signal=42%	PSMB3/CSF1R/CTSD/PRKCSH/CD93/ICAM1/MMP9/PSMB8
DOANE_BREAST_CANCER_ESR1_UP	DOANE_BREAST_CANCER_ESR1_UP	7	-0.790135	-1.42314	0.041876	0.745734	0.734649	3	tags=43%, list=0%, signal=43%	AZGP1/FBP1/SELENBP1
ZHOU_INFLAMMATORY_RESPONSE_LIVE_UP	ZHOU_INFLAMMATORY_RESPONSE_LIVE_UP	15	-0.682158	-1.45961	0.0419075	0.745734	0.734649	28	tags=40%, list=4%, signal=39%	OAF/ICAM1/PTX3/B4GALT1/CHI3L1/SELENBP1
GSE42021_CD24HI_VS_CD24INT_TCONV_THYMUS_DN	GSE42021_CD24HI_VS_CD24INT_TCONV_THYMUS_DN	11	-0.730361	-1.46865	0.041979	0.745734	0.734649	82	tags=45%, list=11%, signal=41%	CBR3/LAP3/PSMB9/ICAM1/PSMB8
GOBP_POSITIVE_REGULATION_OF_NEURON_PROJECTION_DEVELOPMENT	GOBP_POSITIVE_REGULATION_OF_NEURON_PROJECTION_DEVELOPMENT	7	-0.798517	-1.43824	0.0420566	0.745734	0.734649	95	tags=29%, list=13%, signal=25%	ACTR2/S100A9
REACTOME_GLYCOSAMINOGLYCAN_METABOLISM	REACTOME_GLYCOSAMINOGLYCAN_METABOLISM	7	-0.798632	-1.43845	0.0420566	0.745734	0.734649	65	tags=57%, list=9%, signal=53%	VCAN/SDC1/OGN/B4GALT1
GSE7568_IL4_TGFB_DEXAMETHASONE_VS_IL4_TGFB_TREATED_MACROPHAGE_UP	GSE7568_IL4_TGFB_DEXAMETHASONE_VS_IL4_TGFB_TREATED_MACROPHAGE_UP	5	0.834767	1.5078	0.0420679	0.745734	0.734649	111	tags=60%, list=15%, signal=51%	NT5DC3/PFKP/G3BP1
GSE1925_CTRL_VS_3H_IFNG_STIM_IFNG_PRIMED_MACROPHAGE_DN	GSE1925_CTRL_VS_3H_IFNG_STIM_IFNG_PRIMED_MACROPHAGE_DN	9	-0.750558	-1.44825	0.0421217	0.745734	0.734649	51	tags=56%, list=7%, signal=52%	FABP4/ADAM12/MCAM/PTGR1/PTX3
GSE2770_IL12_AND_TGFB_ACT_VS_ACT_CD4_TCELL_2H_DN	GSE2770_IL12_AND_TGFB_ACT_VS_ACT_CD4_TCELL_2H_DN	9	-0.753342	-1.45363	0.0421217	0.745734	0.734649	118	tags=78%, list=16%, signal=66%	BIN2/PYGL/PEBP1/TKT/PSMB9/LTA4H/ELANE
GSE37533_PPARG1_FOXP3_VS_PPARG2_FOXP3_TRANSDUCED_CD4_TCELL_PIOGLITAZONE_TREATED_DN	GSE37533_PPARG1_FOXP3_VS_PPARG2_FOXP3_TRANSDUCED_CD4_TCELL_PIOGLITAZONE_TREATED_DN	9	-0.752445	-1.4519	0.0421217	0.745734	0.734649	102	tags=67%, list=14%, signal=58%	CBR3/PSMA4/LAP3/GOLM1/PSMB9/PSMB8
GUTIERREZ_WALDENSTROEMS_MACROGLOBULINEMIA_1_DN	GUTIERREZ_WALDENSTROEMS_MACROGLOBULINEMIA_1_DN	1	-0.980952	-1.29811	0.0424054	0.748088	0.736968	16	tags=100%, list=2%, signal=98%
SHIN_B_CELL_LYMPHOMA_CLUSTER_6	SHIN_B_CELL_LYMPHOMA_CLUSTER_6	1	-0.980952	-1.29811	0.0424054	0.748088	0.736968	16	tags=100%, list=2%, signal=98%
HP_REDUCED_VISUAL_ACUITY	HP_REDUCED_VISUAL_ACUITY	16	0.611493	1.55672	0.0424063	0.748088	0.736968	214	tags=56%, list=29%, signal=41%	PRDX1/RAC1/HSD17B10/ITGA2B/PGK1/ITGB3/TUBB4B/FLNA/RBP4
GOBP_MONOCYTE_CHEMOTACTIC_PROTEIN_1_PRODUCTION	GOBP_MONOCYTE_CHEMOTACTIC_PROTEIN_1_PRODUCTION	3	0.919435	1.43728	0.0426153	0.748088	0.736968	48	tags=33%, list=7%, signal=31%	GSTP1
BRUINS_UVC_RESPONSE_VIA_TP53_GROUP_B	BRUINS_UVC_RESPONSE_VIA_TP53_GROUP_B	22	0.539752	1.49784	0.042789	0.748088	0.736968	86	tags=36%, list=12%, signal=33%	CD59/DCXR/SPARC/SERPINE1/RGS18/MATR3/ENO3/RPS12
DOANE_RESPONSE_TO_ANDROGEN_DN	DOANE_RESPONSE_TO_ANDROGEN_DN	14	-0.691118	-1.46931	0.0429185	0.748088	0.736968	100	tags=43%, list=14%, signal=38%	RPS2/IGFBP2/TNC/MCAM/CSH2/PSMB8
HAHTOLA_MYCOSIS_FUNGOIDES_SKIN_DN	HAHTOLA_MYCOSIS_FUNGOIDES_SKIN_DN	4	-0.875378	-1.40855	0.0429197	0.748088	0.736968	11	tags=50%, list=1%, signal=50%	CAT/B4GALT1
GOBP_REGULATION_OF_FIBRINOLYSIS	GOBP_REGULATION_OF_FIBRINOLYSIS	11	0.676011	1.51412	0.0429675	0.748088	0.736968	23	tags=9%, list=3%, signal=9%	SERPINE1
GOBP_NEGATIVE_REGULATION_OF_CELL_CYCLE_G2_M_PHASE_TRANSITION	GOBP_NEGATIVE_REGULATION_OF_CELL_CYCLE_G2_M_PHASE_TRANSITION	13	-0.702158	-1.48203	0.0429799	0.748088	0.736968	129	tags=77%, list=18%, signal=65%	PSMB3/PSMA2/PSMA4/PSMB4/PSMB9/PSMA1/PSMA3/PSMA5/PSMA7/PSMB8
GOBP_NEGATIVE_REGULATION_OF_CELL_CYCLE_PHASE_TRANSITION	GOBP_NEGATIVE_REGULATION_OF_CELL_CYCLE_PHASE_TRANSITION	13	-0.702158	-1.48203	0.0429799	0.748088	0.736968	129	tags=77%, list=18%, signal=65%	PSMB3/PSMA2/PSMA4/PSMB4/PSMB9/PSMA1/PSMA3/PSMA5/PSMA7/PSMB8
GOBP_NEGATIVE_REGULATION_OF_MITOTIC_CELL_CYCLE	GOBP_NEGATIVE_REGULATION_OF_MITOTIC_CELL_CYCLE	13	-0.702158	-1.48203	0.0429799	0.748088	0.736968	129	tags=77%, list=18%, signal=65%	PSMB3/PSMA2/PSMA4/PSMB4/PSMB9/PSMA1/PSMA3/PSMA5/PSMA7/PSMB8
GOCC_COLLAGEN_TRIMER	GOCC_COLLAGEN_TRIMER	13	-0.702298	-1.48233	0.0429799	0.748088	0.736968	173	tags=38%, list=24%, signal=30%	COL18A1/MBL2/COL6A3/COLEC10/COL6A1
GSE43955_TH0_VS_TGFB_IL6_TH17_ACT_CD4_TCELL_30H_UP	GSE43955_TH0_VS_TGFB_IL6_TH17_ACT_CD4_TCELL_30H_UP	13	-0.699915	-1.4773	0.0429799	0.748088	0.736968	152	tags=46%, list=21%, signal=37%	SLC4A1/SAA2/FABP1/REG1A/CD93/PTX3
GSE9650_NAIVE_VS_MEMORY_CD8_TCELL_DN	GSE9650_NAIVE_VS_MEMORY_CD8_TCELL_DN	13	-0.70199	-1.48168	0.0429799	0.748088	0.736968	74	tags=31%, list=10%, signal=28%	CTSD/TXN/LGALS1/NUCB1
GOBP_POSITIVE_REGULATION_OF_CELL_DEATH	GOBP_POSITIVE_REGULATION_OF_CELL_DEATH	34	-0.569723	-1.41855	0.0429836	0.748088	0.736968	76	tags=18%, list=10%, signal=17%	SNCA/CTSD/MMP9/S100A8/B4GALT1/S100A9
GOBP_MODULATION_BY_SYMBIONT_OF_ENTRY_INTO_HOST	GOBP_MODULATION_BY_SYMBIONT_OF_ENTRY_INTO_HOST	6	-0.809006	-1.42435	0.0431177	0.748088	0.736968	32	tags=50%, list=4%, signal=48%	P4HB/LGALS1/PTX3
GOBP_RESPONSE_TO_LIGHT_STIMULUS	GOBP_RESPONSE_TO_LIGHT_STIMULUS	6	-0.810257	-1.42655	0.0431177	0.748088	0.736968	25	tags=67%, list=3%, signal=65%	NPM1/MMP9/TIMP1/ELANE
GSE2770_UNTREATED_VS_IL12_TREATED_ACT_CD4_TCELL_6H_UP	GSE2770_UNTREATED_VS_IL12_TREATED_ACT_CD4_TCELL_6H_UP	6	-0.809207	-1.4247	0.0431177	0.748088	0.736968	87	tags=67%, list=12%, signal=59%	C2CD3/HNRNPA1/PSMB9/ICAM1
GOMF_ZINC_ION_BINDING	GOMF_ZINC_ION_BINDING	35	-0.568542	-1.419	0.0431472	0.748088	0.736968	142	tags=37%, list=19%, signal=31%	PAPPA/ENPP2/MT1X/SORD/SNCA/CSRP1/BHMT/LTA4H/MMP9/TIMP1/S100A8/CA3/S100A9
HP_LIMB_UNDERGROWTH	HP_LIMB_UNDERGROWTH	10	0.717517	1.57301	0.0431559	0.748088	0.736968	79	tags=30%, list=11%, signal=27%	PSAT1/RAC1/PPIB
GSE3982_MAST_CELL_VS_EFF_MEMORY_CD4_TCELL_UP	GSE3982_MAST_CELL_VS_EFF_MEMORY_CD4_TCELL_UP	16	-0.670062	-1.46236	0.0431755	0.748088	0.736968	184	tags=62%, list=25%, signal=48%	MTHFD1/HYOU1/PSMB5/NRP1/ENPP2/PEBP1/TKT/LAP3/S100A8/S100A9
BROWNE_HCMV_INFECTION_8HR_UP	BROWNE_HCMV_INFECTION_8HR_UP	8	-0.773811	-1.45693	0.0432	0.748088	0.736968	72	tags=75%, list=10%, signal=68%	GPX3/TFRC/SOD2/IGFBP2/ICAM1/ELANE
GSE12845_IGD_POS_BLOOD_VS_PRE_GC_TONSIL_BCELL_UP	GSE12845_IGD_POS_BLOOD_VS_PRE_GC_TONSIL_BCELL_UP	8	-0.774257	-1.45777	0.0432	0.748088	0.736968	2	tags=25%, list=0%, signal=25%	HLA-B/NUCB1
GOCC_LYSOSOMAL_LUMEN	GOCC_LYSOSOMAL_LUMEN	11	-0.72849	-1.46489	0.0434783	0.75219	0.74101	74	tags=36%, list=10%, signal=33%	VCAN/CTSD/SDC1/OGN
GOBP_STEROL_TRANSPORT	GOBP_STEROL_TRANSPORT	19	-0.640387	-1.43249	0.0437756	0.756183	0.744943	177	tags=26%, list=24%, signal=21%	PCSK9/LIPC/CES1/APOA5/TSKU
GOMF_SELENIUM_BINDING	GOMF_SELENIUM_BINDING	2	-0.947917	-1.31734	0.0438625	0.756183	0.744943	3	tags=100%, list=0%, signal=100%	SELENBP1
DAZARD_UV_RESPONSE_CLUSTER_G5	DAZARD_UV_RESPONSE_CLUSTER_G5	4	-0.863388	-1.38926	0.0439189	0.756183	0.744943	105	tags=100%, list=14%, signal=86%	GPI/RPS2/NUCB1
GSE3720_UNSTIM_VS_LPS_STIM_VD1_GAMMADELTA_TCELL_UP	GSE3720_UNSTIM_VS_LPS_STIM_VD1_GAMMADELTA_TCELL_UP	4	-0.863325	-1.38915	0.0439189	0.756183	0.744943	84	tags=50%, list=11%, signal=45%	CLIC1/GOLM1
GSE25085_FETAL_BM_VS_ADULT_BM_SP4_THYMIC_IMPLANT_UP	GSE25085_FETAL_BM_VS_ADULT_BM_SP4_THYMIC_IMPLANT_UP	5	-0.828035	-1.40068	0.0439932	0.756183	0.744943	25	tags=100%, list=3%, signal=97%	HLA-B/UBC/MMP9/PSMB8
GSE6674_CPG_VS_PL2_3_STIM_BCELL_DN	GSE6674_CPG_VS_PL2_3_STIM_BCELL_DN	5	-0.827372	-1.39956	0.0439932	0.756183	0.744943	2	tags=60%, list=0%, signal=60%	XPO1/VASP/NUCB1
GOBP_POSITIVE_REGULATION_OF_FATTY_ACID_METABOLIC_PROCESS	GOBP_POSITIVE_REGULATION_OF_FATTY_ACID_METABOLIC_PROCESS	5	-0.85345	-1.44368	0.0440099	0.756183	0.744943	99	tags=40%, list=13%, signal=35%	FABP1/APOA5
GOBP_POSITIVE_REGULATION_OF_PROTEIN_KINASE_ACTIVITY	GOBP_POSITIVE_REGULATION_OF_PROTEIN_KINASE_ACTIVITY	29	-0.586464	-1.42163	0.0440415	0.756183	0.744943	89	tags=41%, list=12%, signal=38%	IGFBP6/CALM2/UBC/HSP90AB1/SAA1/CSF1R/SNCA/LTF/TXN/DAG1/ELANE/CHI3L1
GOBP_PROTEIN_LIPID_COMPLEX_SUBUNIT_ORGANIZATION	GOBP_PROTEIN_LIPID_COMPLEX_SUBUNIT_ORGANIZATION	20	-0.640319	-1.45673	0.0441522	0.757371	0.746114	42	tags=25%, list=6%, signal=24%	P4HB/LIPC/APOA5/PLA2G2A/MPO
GOBP_TRANSFORMING_GROWTH_FACTOR_BETA1_PRODUCTION	GOBP_TRANSFORMING_GROWTH_FACTOR_BETA1_PRODUCTION	3	-0.914511	-1.36495	0.044484	0.761626	0.750305	17	tags=67%, list=2%, signal=65%	LUM/TSKU
MISHRA_CARCINOMA_ASSOCIATED_FIBROBLAST_UP	MISHRA_CARCINOMA_ASSOCIATED_FIBROBLAST_UP	3	-0.914052	-1.36427	0.044484	0.761626	0.750305	67	tags=100%, list=9%, signal=91%	MMP9/COL6A1
KEGG_NEUROACTIVE_LIGAND_RECEPTOR_INTERACTION	KEGG_NEUROACTIVE_LIGAND_RECEPTOR_INTERACTION	3	0.91763	1.43446	0.0446608	0.763218	0.751873	19	tags=33%, list=3%, signal=33%	PRSS2
PID_IL2_PI3K_PATHWAY	PID_IL2_PI3K_PATHWAY	3	0.917654	1.4345	0.0446608	0.763218	0.751873	58	tags=67%, list=8%, signal=62%	RAC1/RPS6
DOUGLAS_BMI1_TARGETS_DN	DOUGLAS_BMI1_TARGETS_DN	8	-0.768833	-1.44756	0.0448	0.763389	0.752042	74	tags=50%, list=10%, signal=45%	CTSD/BPGM/PSMB9/ICAM1
GSE25123_CTRL_VS_IL4_STIM_PPARG_KO_MACROPHAGE_DN	GSE25123_CTRL_VS_IL4_STIM_PPARG_KO_MACROPHAGE_DN	8	-0.772163	-1.45383	0.0448	0.763389	0.752042	63	tags=38%, list=9%, signal=35%	AGT/MYO5A/PSMB8
GSE9037_CTRL_VS_LPS_4H_STIM_BMDM_DN	GSE9037_CTRL_VS_LPS_4H_STIM_BMDM_DN	8	-0.772738	-1.45491	0.0448	0.763389	0.752042	135	tags=62%, list=18%, signal=52%	ENPP2/PSMA2/PSMA3/TIMP1/PSMA7
HP_GONOSOMAL_INHERITANCE	HP_GONOSOMAL_INHERITANCE	10	0.714419	1.56622	0.0449264	0.763389	0.752042	85	tags=40%, list=12%, signal=36%	FHL1/AIFM1/IGF2/MSN
GOBP_MULTICELLULAR_ORGANISM_GROWTH	GOBP_MULTICELLULAR_ORGANISM_GROWTH	5	0.832258	1.50326	0.0449943	0.763389	0.752042	79	tags=40%, list=11%, signal=36%	IGF2/PPIB
GSE37301_GRANULOCYTE_MONOCYTE_PROGENITOR_VS_RAG2_KO_NK_CELL_UP	GSE37301_GRANULOCYTE_MONOCYTE_PROGENITOR_VS_RAG2_KO_NK_CELL_UP	8	0.743416	1.53298	0.0450643	0.763389	0.752042	60	tags=38%, list=8%, signal=35%	RAB11A/AIFM1/ATP2A3
GSE17721_PAM3CSK4_VS_GADIQUIMOD_1H_BMDC_UP	GSE17721_PAM3CSK4_VS_GADIQUIMOD_1H_BMDC_UP	10	-0.73954	-1.46507	0.0451128	0.763389	0.752042	137	tags=50%, list=19%, signal=41%	KRT16/PSMB3/FSTL1/PRKCSH/ICAM1
GSE29618_PRE_VS_DAY7_POST_TIV_FLU_VACCINE_BCELL_UP	GSE29618_PRE_VS_DAY7_POST_TIV_FLU_VACCINE_BCELL_UP	10	-0.739785	-1.46556	0.0451128	0.763389	0.752042	55	tags=30%, list=7%, signal=28%	IGFBP4/SPP1/CSH2
COLIN_PILOCYTIC_ASTROCYTOMA_VS_GLIOBLASTOMA_DN	COLIN_PILOCYTIC_ASTROCYTOMA_VS_GLIOBLASTOMA_DN	7	-0.787215	-1.41788	0.0452261	0.763389	0.752042	55	tags=43%, list=7%, signal=40%	TFRC/SPP1/CHI3L1
GSE13306_TREG_VS_TCONV_UP	GSE13306_TREG_VS_TCONV_UP	7	-0.788211	-1.41968	0.0452261	0.763389	0.752042	60	tags=29%, list=8%, signal=26%	LTF/TIMP1
ONDER_CDH1_TARGETS_1_UP	ONDER_CDH1_TARGETS_1_UP	7	-0.789149	-1.42137	0.0452261	0.763389	0.752042	72	tags=43%, list=10%, signal=39%	GPX3/IGFBP2/FTL
ABBUD_LIF_SIGNALING_1_UP	ABBUD_LIF_SIGNALING_1_UP	12	-0.713451	-1.4746	0.0452555	0.763389	0.752042	101	tags=75%, list=14%, signal=66%	GPX3/FBP1/VWF/LRG1/LBP/LCN2/ACAA2/MPO/PSMB8
GSE40068_CXCR5NEG_BCL6NEG_CD4_TCELL_VS_CXCR5POS_BCL6NEG_TFH_DN	GSE40068_CXCR5NEG_BCL6NEG_CD4_TCELL_VS_CXCR5POS_BCL6NEG_TFH_DN	9	-0.778978	-1.50309	0.045268	0.763389	0.752042	75	tags=56%, list=10%, signal=51%	CDH1/GOLM1/TXN/LGALS1/NUCB1
GOBP_NEGATIVE_REGULATION_OF_MYELOID_LEUKOCYTE_DIFFERENTIATION	GOBP_NEGATIVE_REGULATION_OF_MYELOID_LEUKOCYTE_DIFFERENTIATION	4	-0.873106	-1.40489	0.0454594	0.763389	0.752042	60	tags=75%, list=8%, signal=69%	APCS/C1QC/LTF
GOBP_RESPONSE_TO_NITROGEN_COMPOUND	GOBP_RESPONSE_TO_NITROGEN_COMPOUND	61	-0.509907	-1.37968	0.0455076	0.763389	0.752042	151	tags=39%, list=21%, signal=34%	CDH1/HSP90AB1/NPM1/CPS1/FABP3/CES1/YWHAG/REG3A/GOT2/ACTR2/PKLR/SNCA/SDC1/MYO5A/REG1A/TXN/DHX9/IGFBP1/DAG1/ICAM1/MMP9/TIMP1/CSH2/COL6A1
REACTOME_MAPK_FAMILY_SIGNALING_CASCADES	REACTOME_MAPK_FAMILY_SIGNALING_CASCADES	34	-0.567037	-1.41186	0.045512	0.763389	0.752042	131	tags=50%, list=18%, signal=43%	PSMA6/ACTG1/PSMB5/YWHAB/NCAM1/PSMB3/PSMA2/PEBP1/PSMA4/PSMB4/SPTB/PSMB9/PSMA1/PSMA3/PSMA5/PSMA7/PSMB8
GSE28737_WT_VS_BCL6_KO_FOLLICULAR_BCELL_UP	GSE28737_WT_VS_BCL6_KO_FOLLICULAR_BCELL_UP	5	-0.852367	-1.44185	0.0455363	0.763389	0.752042	15	tags=60%, list=2%, signal=59%	HYOU1/ELANE/CHI3L1
GOMF_RECEPTOR_REGULATOR_ACTIVITY	GOMF_RECEPTOR_REGULATOR_ACTIVITY	23	-0.611115	-1.42803	0.0455729	0.763389	0.752042	105	tags=35%, list=14%, signal=31%	TYMP/GPI/COLEC10/REG1A/SPP1/OGN/TIMP1/CSH2
GOBP_EPITHELIAL_TO_MESENCHYMAL_TRANSITION	GOBP_EPITHELIAL_TO_MESENCHYMAL_TRANSITION	4	-0.862892	-1.38846	0.0456081	0.763389	0.752042	35	tags=75%, list=5%, signal=72%	OLFM1/VASN/DAG1
WP_ALLOGRAFT_REJECTION	WP_ALLOGRAFT_REJECTION	18	0.585517	1.56155	0.0456837	0.763389	0.752042	10	tags=6%, list=1%, signal=6%	HLA-C
WP_ANDROGEN_RECEPTOR_SIGNALING_PATHWAY	WP_ANDROGEN_RECEPTOR_SIGNALING_PATHWAY	5	0.831346	1.50162	0.0457259	0.763389	0.752042	47	tags=40%, list=6%, signal=38%	PRDX1/RAC1
RIGGINS_TAMOXIFEN_RESISTANCE_DN	RIGGINS_TAMOXIFEN_RESISTANCE_DN	14	-0.686498	-1.45949	0.0457797	0.763389	0.752042	118	tags=29%, list=16%, signal=24%	PYGL/LAP3/TIMP1/S100A8
SENGUPTA_NASOPHARYNGEAL_CARCINOMA_WITH_LMP1_DN	SENGUPTA_NASOPHARYNGEAL_CARCINOMA_WITH_LMP1_DN	14	-0.68607	-1.45858	0.0457797	0.763389	0.752042	101	tags=21%, list=14%, signal=19%	LCN2/S100A8/S100A9
GOBP_NEGATIVE_REGULATION_OF_ENDOTHELIAL_CELL_PROLIFERATION	GOBP_NEGATIVE_REGULATION_OF_ENDOTHELIAL_CELL_PROLIFERATION	4	0.874024	1.4584	0.0458374	0.763389	0.752042	21	tags=25%, list=3%, signal=24%	SPARC
CHIANG_LIVER_CANCER_SUBCLASS_UNANNOTATED_UP	CHIANG_LIVER_CANCER_SUBCLASS_UNANNOTATED_UP	13	-0.69788	-1.473	0.0458453	0.763389	0.752042	56	tags=23%, list=8%, signal=22%	CFHR3/BHMT/B4GALT1
GOBP_POSITIVE_REGULATION_OF_CANONICAL_WNT_SIGNALING_PATHWAY	GOBP_POSITIVE_REGULATION_OF_CANONICAL_WNT_SIGNALING_PATHWAY	13	-0.696762	-1.47064	0.0458453	0.763389	0.752042	129	tags=77%, list=18%, signal=65%	PSMB3/PSMA2/PSMA4/PSMB4/PSMB9/PSMA1/PSMA3/PSMA5/PSMA7/PSMB8
GOBP_POSITIVE_REGULATION_OF_WNT_SIGNALING_PATHWAY	GOBP_POSITIVE_REGULATION_OF_WNT_SIGNALING_PATHWAY	13	-0.696762	-1.47064	0.0458453	0.763389	0.752042	129	tags=77%, list=18%, signal=65%	PSMB3/PSMA2/PSMA4/PSMB4/PSMB9/PSMA1/PSMA3/PSMA5/PSMA7/PSMB8
GSE46242_TH1_VS_ANERGIC_TH1_CD4_TCELL_WITH_EGR2_DELETED_DN	GSE46242_TH1_VS_ANERGIC_TH1_CD4_TCELL_WITH_EGR2_DELETED_DN	13	-0.69694	-1.47102	0.0458453	0.763389	0.752042	52	tags=31%, list=7%, signal=29%	NUP214/DAG1/PTX3/NUCB1
BROWNE_HCMV_INFECTION_24HR_UP	BROWNE_HCMV_INFECTION_24HR_UP	5	-0.849487	-1.43697	0.0460451	0.764112	0.752754	28	tags=40%, list=4%, signal=39%	OLFM1/ICAM1
GOBP_POSITIVE_REGULATION_OF_VASCULAR_ASSOCIATED_SMOOTH_MUSCLE_CELL_PROLIFERATION	GOBP_POSITIVE_REGULATION_OF_VASCULAR_ASSOCIATED_SMOOTH_MUSCLE_CELL_PROLIFERATION	2	-0.946443	-1.31529	0.0460694	0.764112	0.752754	25	tags=100%, list=3%, signal=97%	MMP9
GSE17721_LPS_VS_POLYIC_12H_BMDC_DN	GSE17721_LPS_VS_POLYIC_12H_BMDC_DN	7	-0.794066	-1.43022	0.046086	0.764112	0.752754	102	tags=57%, list=14%, signal=50%	PSMA4/LASP1/SDC1/SERPINB1
SESTO_RESPONSE_TO_UV_C6	SESTO_RESPONSE_TO_UV_C6	7	-0.794343	-1.43072	0.046086	0.764112	0.752754	118	tags=71%, list=16%, signal=61%	PYGL/HNRNPA1/TNC/PTGR1/MMP9
GSE369_PRE_VS_POST_IL6_INJECTION_SOCS3_KO_LIVER_UP	GSE369_PRE_VS_POST_IL6_INJECTION_SOCS3_KO_LIVER_UP	22	-0.619792	-1.43564	0.0461133	0.764112	0.752754	85	tags=23%, list=12%, signal=21%	FSTL1/SPP1/TXN/IL1RL1/S100A8
GOBP_COAGULATION	GOBP_COAGULATION	73	0.380101	1.31694	0.0462957	0.764112	0.752754	50	tags=8%, list=7%, signal=9%	CD59/CAPZA1/ILK/SERPINE1/RAC1/F7
GSE23925_DARK_ZONE_VS_NAIVE_BCELL_DN	GSE23925_DARK_ZONE_VS_NAIVE_BCELL_DN	8	-0.767909	-1.44582	0.0464	0.764112	0.752754	135	tags=50%, list=18%, signal=41%	ENPP2/SRGN/OAF/CSRP1
TOMLINS_PROSTATE_CANCER_UP	TOMLINS_PROSTATE_CANCER_UP	7	0.797992	1.59898	0.0464033	0.764112	0.752754	79	tags=43%, list=11%, signal=39%	RAB11A/EEF2/PPIB
GSE11961_GERMINAL_CENTER_BCELL_DAY7_VS_PLASMA_CELL_DAY7_UP	GSE11961_GERMINAL_CENTER_BCELL_DAY7_VS_PLASMA_CELL_DAY7_UP	6	-0.804996	-1.41729	0.0464345	0.764112	0.752754	18	tags=50%, list=2%, signal=49%	HSPA5/PSMA5/SERPINB1
GSE3994_WT_VS_PAC1_KO_ACTIVATED_MAST_CELL_DN	GSE3994_WT_VS_PAC1_KO_ACTIVATED_MAST_CELL_DN	6	-0.807491	-1.42168	0.0464345	0.764112	0.752754	66	tags=33%, list=9%, signal=31%	LASP1/SPP1
HP_ABNORMALITY_OF_THE_PITUITARY_GLAND	HP_ABNORMALITY_OF_THE_PITUITARY_GLAND	6	-0.806188	-1.41939	0.0464345	0.764112	0.752754	45	tags=50%, list=6%, signal=47%	GANAB/APOA5/PSMB8
LUCAS_HNF4A_TARGETS_UP	LUCAS_HNF4A_TARGETS_UP	6	-0.80676	-1.42039	0.0464345	0.764112	0.752754	66	tags=67%, list=9%, signal=61%	NID1/LASP1/PRKCSH/SELENBP1
RODWELL_AGING_KIDNEY_NO_BLOOD_DN	RODWELL_AGING_KIDNEY_NO_BLOOD_DN	6	-0.804644	-1.41667	0.0464345	0.764112	0.752754	109	tags=50%, list=15%, signal=43%	PEBP1/GOT2/PTGR1
GSE17721_4H_VS_24H_POLYIC_BMDC_DN	GSE17721_4H_VS_24H_POLYIC_BMDC_DN	5	-0.84905	-1.43623	0.0465538	0.765384	0.754007	57	tags=60%, list=8%, signal=56%	PSMA1/PRKCSH/FTL
GOBP_REGULATION_OF_BODY_FLUID_LEVELS	GOBP_REGULATION_OF_BODY_FLUID_LEVELS	77	0.370556	1.30606	0.0467459	0.76726	0.755855	50	tags=9%, list=7%, signal=9%	CD59/CAPZA1/ILK/RAB11A/SERPINE1/RAC1/F7
TORCHIA_TARGETS_OF_EWSR1_FLI1_FUSION_UP	TORCHIA_TARGETS_OF_EWSR1_FLI1_FUSION_UP	18	0.582634	1.55386	0.0467523	0.76726	0.755855	94	tags=33%, list=13%, signal=30%	CD59/DCXR/RAB11A/ATP2A3/RSU1/RAB27B
GOBP_APOPTOTIC_PROCESS	GOBP_APOPTOTIC_PROCESS	95	-0.466155	-1.332	0.0469799	0.76966	0.75822	156	tags=35%, list=21%, signal=31%	PDIA3/SOD2/TCP1/P4HB/PCSK9/HYOU1/YWHAB/VNN1/HSPA1B/HSP90AB1/NPM1/GBE1/YWHAG/SRGN/LCN2/FABP1/CORO1A/CSF1R/FSTL1/HINT1/SNCA/CTSD/LTF/ACAA2/LGALS1/ICAM1/MPO/MMP9/TIMP1/S100A8/B4GALT1/CHI3L1/S100A9
WP_TYPE_II_INTERFERON_SIGNALING_IFNG	WP_TYPE_II_INTERFERON_SIGNALING_IFNG	4	-0.871332	-1.40204	0.0469831	0.76966	0.75822	61	tags=100%, list=8%, signal=92%	REG1A/PSMB9/ICAM1
GSE10325_LUPUS_CD4_TCELL_VS_LUPUS_MYELOID_DN	GSE10325_LUPUS_CD4_TCELL_VS_LUPUS_MYELOID_DN	18	-0.651327	-1.43798	0.0470914	0.770079	0.758632	89	tags=33%, list=12%, signal=30%	CSF1R/GOLM1/CTSD/FTL/CD93/S100A9
GSE32986_CURDLAN_LOWDOSE_VS_CURDLAN_HIGHDOSE_STIM_DC_DN	GSE32986_CURDLAN_LOWDOSE_VS_CURDLAN_HIGHDOSE_STIM_DC_DN	7	-0.793227	-1.42871	0.0470933	0.770079	0.758632	127	tags=57%, list=17%, signal=48%	FABP3/SRGN/SDC1/PTX3
HP_ABNORMAL_MACULAR_MORPHOLOGY	HP_ABNORMAL_MACULAR_MORPHOLOGY	14	-0.685058	-1.45643	0.0472103	0.771299	0.759835	63	tags=43%, list=9%, signal=40%	CST3/CFHR3/COL18A1/MYO5A/FBLN5/UGP2
HECKER_IFNB1_TARGETS	HECKER_IFNB1_TARGETS	16	-0.667723	-1.45725	0.0473538	0.772255	0.760776	105	tags=31%, list=14%, signal=27%	TYMP/LAP3/CD163/MMP9/CHI3L1
GSE1925_CTRL_VS_IFNG_PRIMED_MACROPHAGE_UP	GSE1925_CTRL_VS_IFNG_PRIMED_MACROPHAGE_UP	9	-0.776345	-1.49801	0.0476134	0.772255	0.760776	74	tags=56%, list=10%, signal=51%	NRP1/CTSD/TNC/SDC1/LTA4H
GSE17721_LPS_VS_CPG_16H_BMDC_DN	GSE17721_LPS_VS_CPG_16H_BMDC_DN	15	-0.675732	-1.44586	0.0476879	0.772255	0.760776	60	tags=40%, list=8%, signal=38%	PYGL/LTF/PTGR1/CD93/SPARCL1/S100A9
DALESSIO_TSA_RESPONSE	DALESSIO_TSA_RESPONSE	2	-0.938285	-1.30395	0.0477064	0.772255	0.760776	32	tags=100%, list=4%, signal=96%	LGALS1
GOBP_PERIPHERAL_NERVOUS_SYSTEM_DEVELOPMENT	GOBP_PERIPHERAL_NERVOUS_SYSTEM_DEVELOPMENT	2	-0.937689	-1.30312	0.0477064	0.772255	0.760776	35	tags=100%, list=5%, signal=96%	DAG1
GOBP_SCHWANN_CELL_DEVELOPMENT	GOBP_SCHWANN_CELL_DEVELOPMENT	2	-0.937689	-1.30312	0.0477064	0.772255	0.760776	35	tags=100%, list=5%, signal=96%	DAG1
GOBP_SCHWANN_CELL_DIFFERENTIATION	GOBP_SCHWANN_CELL_DIFFERENTIATION	2	-0.937689	-1.30312	0.0477064	0.772255	0.760776	35	tags=100%, list=5%, signal=96%	DAG1
GOMF_LIPASE_ACTIVATOR_ACTIVITY	GOMF_LIPASE_ACTIVATOR_ACTIVITY	2	-0.937537	-1.30291	0.0477064	0.772255	0.760776	42	tags=100%, list=6%, signal=95%	APOA5
MATSUDA_NATURAL_KILLER_DIFFERENTIATION	MATSUDA_NATURAL_KILLER_DIFFERENTIATION	42	-0.542237	-1.37771	0.0477387	0.772255	0.760776	155	tags=52%, list=21%, signal=44%	SYNCRIP/PVR/TFRC/SERPINA3/TPI1/NCL/CFHR3/MTHFD1/IGFBP4/HSPA1B/CDH1/ENPP2/GPI/OAF/TKT/CORO1A/FSTL1/CTSD/MYO5A/CSRP1/IGHA2/SERPINB1
GSE36078_WT_VS_IL1R_KO_LUNG_DC_DN	GSE36078_WT_VS_IL1R_KO_LUNG_DC_DN	8	-0.765615	-1.4415	0.048	0.772255	0.760776	143	tags=62%, list=19%, signal=51%	PDLIM1/GBE1/IL1RL1/LGALS1/SERPINB1
REACTOME_CARGO_CONCENTRATION_IN_THE_ER	REACTOME_CARGO_CONCENTRATION_IN_THE_ER	4	0.871686	1.4545	0.0480376	0.772255	0.760776	1	tags=25%, list=0%, signal=25%	CD59
REACTOME_COPII_MEDIATED_VESICLE_TRANSPORT	REACTOME_COPII_MEDIATED_VESICLE_TRANSPORT	4	0.871686	1.4545	0.0480376	0.772255	0.760776	1	tags=25%, list=0%, signal=25%	CD59
GSE2405_0H_VS_1.5H_A_PHAGOCYTOPHILUM_STIM_NEUTROPHIL_DN	GSE2405_0H_VS_1.5H_A_PHAGOCYTOPHILUM_STIM_NEUTROPHIL_DN	3	-0.91369	-1.36373	0.0480427	0.772255	0.760776	53	tags=100%, list=7%, signal=93%	ACAA2/LTA4H
RADMACHER_AML_PROGNOSIS	RADMACHER_AML_PROGNOSIS	6	-0.803402	-1.41448	0.0480929	0.772255	0.760776	101	tags=50%, list=14%, signal=43%	LCN2/PRG2/SELENBP1
GSE17721_12H_VS_24H_POLYIC_BMDC_DN	GSE17721_12H_VS_24H_POLYIC_BMDC_DN	7	-0.791744	-1.42604	0.0481006	0.772255	0.760776	38	tags=43%, list=5%, signal=41%	PTGR1/B4GALT1/NUCB1
GOBP_IRON_ION_HOMEOSTASIS	GOBP_IRON_ION_HOMEOSTASIS	10	-0.737017	-1.46007	0.0481203	0.772255	0.760776	119	tags=40%, list=16%, signal=34%	FTH1/LCN2/LTF/FTL
BIOCARTA_LAIR_PATHWAY	BIOCARTA_LAIR_PATHWAY	7	-0.786247	-1.41614	0.0485762	0.772255	0.760776	28	tags=57%, list=4%, signal=55%	C5/C7/VCAM1/ICAM1
GSE24210_IL35_TREATED_VS_RESTING_TREG_DN	GSE24210_IL35_TREATED_VS_RESTING_TREG_DN	7	-0.785475	-1.41475	0.0485762	0.772255	0.760776	127	tags=57%, list=17%, signal=48%	FABP3/LCN2/KRT31/TSKU
ICHIBA_GRAFT_VERSUS_HOST_DISEASE_D7_DN	ICHIBA_GRAFT_VERSUS_HOST_DISEASE_D7_DN	7	-0.785317	-1.41447	0.0485762	0.772255	0.760776	141	tags=43%, list=19%, signal=35%	LIPC/PKLR/IGHA2
WP_CELLS_AND_MOLECULES_INVOLVED_IN_LOCAL_ACUTE_INFLAMMATORY_RESPONSE	WP_CELLS_AND_MOLECULES_INVOLVED_IN_LOCAL_ACUTE_INFLAMMATORY_RESPONSE	7	-0.786247	-1.41614	0.0485762	0.772255	0.760776	28	tags=57%, list=4%, signal=55%	C5/C7/VCAM1/ICAM1
CERVERA_SDHB_TARGETS_1_UP	CERVERA_SDHB_TARGETS_1_UP	5	-0.847791	-1.4341	0.048589	0.772255	0.760776	85	tags=60%, list=12%, signal=53%	FSTL1/GOLM1/IGFBP2
GOBP_NEGATIVE_REGULATION_OF_VIRAL_LIFE_CYCLE	GOBP_NEGATIVE_REGULATION_OF_VIRAL_LIFE_CYCLE	5	-0.847915	-1.43431	0.048589	0.772255	0.760776	22	tags=40%, list=3%, signal=39%	APCS/PTX3
GSE360_L_DONOVANI_VS_M_TUBERCULOSIS_DC_DN	GSE360_L_DONOVANI_VS_M_TUBERCULOSIS_DC_DN	26	-0.596627	-1.41801	0.0486202	0.772255	0.760776	46	tags=42%, list=6%, signal=41%	RNASE4/PSMA6/GSR/PYGM/VCAN/HSP90AB1/CD163/PSMA3/S100A8/CHI3L1/S100A9
GOBP_PATTERN_RECOGNITION_RECEPTOR_SIGNALING_PATHWAY	GOBP_PATTERN_RECOGNITION_RECEPTOR_SIGNALING_PATHWAY	14	-0.682839	-1.45171	0.0486409	0.772255	0.760776	60	tags=43%, list=8%, signal=40%	LBP/UBC/HSPA1B/LTF/S100A8/S100A9
BOYLAN_MULTIPLE_MYELOMA_C_UP	BOYLAN_MULTIPLE_MYELOMA_C_UP	2	-0.944314	-1.31233	0.048828	0.772255	0.760776	38	tags=100%, list=5%, signal=95%	PTGR1
GOBP_INTESTINAL_ABSORPTION	GOBP_INTESTINAL_ABSORPTION	4	-0.857532	-1.37983	0.0489865	0.772255	0.760776	99	tags=50%, list=13%, signal=44%	FABP1/APOA5
GSE2770_TGFB_AND_IL4_VS_TGFB_AND_IL12_TREATED_ACT_CD4_TCELL_2H_UP	GSE2770_TGFB_AND_IL4_VS_TGFB_AND_IL12_TREATED_ACT_CD4_TCELL_2H_UP	4	-0.858705	-1.38172	0.0489865	0.772255	0.760776	73	tags=75%, list=10%, signal=68%	QSOX1/MROH2A/FBLN5
SCHAEFFER_SOX9_TARGETS_IN_PROSTATE_DEVELOPMENT_DN	SCHAEFFER_SOX9_TARGETS_IN_PROSTATE_DEVELOPMENT_DN	4	-0.859774	-1.38344	0.0489865	0.772255	0.760776	88	tags=75%, list=12%, signal=66%	OLFM1/COLEC10/FBLN5
SIG_CHEMOTAXIS	SIG_CHEMOTAXIS	4	-0.859015	-1.38222	0.0489865	0.772255	0.760776	95	tags=75%, list=13%, signal=66%	ACTR2/ACTR3/GDI2
HP_ORAL_ULCER	HP_ORAL_ULCER	5	-0.826564	-1.3982	0.0490694	0.772255	0.760776	55	tags=80%, list=7%, signal=75%	CAT/HLA-B/SPP1/ELANE
GSE45365_CD8A_DC_VS_CD11B_DC_IFNAR_KO_MCMV_INFECTION_DN	GSE45365_CD8A_DC_VS_CD11B_DC_IFNAR_KO_MCMV_INFECTION_DN	2	-0.943313	-1.31094	0.0493797	0.772255	0.760776	22	tags=100%, list=3%, signal=97%	PTX3
HP_CYSTIC_LIVER_DISEASE	HP_CYSTIC_LIVER_DISEASE	2	-0.942779	-1.3102	0.0493797	0.772255	0.760776	45	tags=100%, list=6%, signal=94%	PRKCSH
HP_POLYCYSTIC_LIVER_DISEASE	HP_POLYCYSTIC_LIVER_DISEASE	2	-0.942779	-1.3102	0.0493797	0.772255	0.760776	45	tags=100%, list=6%, signal=94%	PRKCSH
REACTOME_MATURATION_OF_SARS_COV_1_SPIKE_PROTEIN	REACTOME_MATURATION_OF_SARS_COV_1_SPIKE_PROTEIN	2	-0.942779	-1.3102	0.0493797	0.772255	0.760776	45	tags=100%, list=6%, signal=94%	PRKCSH
REACTOME_MATURATION_OF_SARS_COV_2_SPIKE_PROTEIN	REACTOME_MATURATION_OF_SARS_COV_2_SPIKE_PROTEIN	2	-0.942779	-1.3102	0.0493797	0.772255	0.760776	45	tags=100%, list=6%, signal=94%	PRKCSH
JINESH_BLEBBISHIELD_VS_LIVE_CONTROL_DN	JINESH_BLEBBISHIELD_VS_LIVE_CONTROL_DN	28	-0.582487	-1.40095	0.0494792	0.772255	0.760776	137	tags=39%, list=19%, signal=33%	KRT16/HNRNPA3/PYGL/LCN2/PSMB4/BPGM/DHX9/TIMP1/S100A8/SERPINB1/S100A9
GSE22935_WT_VS_MYD88_KO_MACROPHAGE_48H_MBOVIS_BCG_STIM_DN	GSE22935_WT_VS_MYD88_KO_MACROPHAGE_48H_MBOVIS_BCG_STIM_DN	9	-0.774907	-1.49524	0.049499	0.772255	0.760776	85	tags=44%, list=12%, signal=40%	FSTL1/CLIC1/ACTR3/LGALS1
GSE30083_SP1_VS_SP2_THYMOCYTE_UP	GSE30083_SP1_VS_SP2_THYMOCYTE_UP	9	-0.774907	-1.49524	0.049499	0.772255	0.760776	69	tags=44%, list=9%, signal=41%	CBR3/BPGM/ICAM1/NUCB1
GSE36527_CD62L_HIGH_CD69_NEG_VS_CD62L_LOW_CD69_POS_TREG_KLRG1_NEG_UP	GSE36527_CD62L_HIGH_CD69_NEG_VS_CD62L_LOW_CD69_POS_TREG_KLRG1_NEG_UP	8	-0.764538	-1.43947	0.0496	0.772255	0.760776	24	tags=50%, list=3%, signal=49%	SLC4A1/PRG2/CA3/B4GALT1
GSE1432_CTRL_VS_IFNG_24H_MICROGLIA_UP	GSE1432_CTRL_VS_IFNG_24H_MICROGLIA_UP	10	-0.736198	-1.45845	0.0496241	0.772255	0.760776	46	tags=50%, list=6%, signal=48%	GBE1/CD163/LTA4H/VSIG4/COL6A1
GSE21063_WT_VS_NFATC1_KO_3H_ANTI_IGM_STIM_BCELL_DN	GSE21063_WT_VS_NFATC1_KO_3H_ANTI_IGM_STIM_BCELL_DN	12	-0.705901	-1.45899	0.049635	0.772255	0.760776	118	tags=67%, list=16%, signal=57%	SOD2/VASP/PYGL/LAP3/PSMB9/TXN/PSMA5/PSMB8
HP_ABNORMAL_PHARYNX_MORPHOLOGY	HP_ABNORMAL_PHARYNX_MORPHOLOGY	12	-0.707348	-1.46199	0.049635	0.772255	0.760776	15	tags=17%, list=2%, signal=17%	ELANE/PSMB8
LEE_AGING_CEREBELLUM_UP	LEE_AGING_CEREBELLUM_UP	12	-0.711532	-1.47063	0.049635	0.772255	0.760776	74	tags=33%, list=10%, signal=30%	B2M/AGT/CTSD/SPP1
REACTOME_DISEASES_ASSOCIATED_WITH_GLYCOSAMINOGLYCAN_METABOLISM	REACTOME_DISEASES_ASSOCIATED_WITH_GLYCOSAMINOGLYCAN_METABOLISM	6	-0.800547	-1.40945	0.0497512	0.772255	0.760776	65	tags=67%, list=9%, signal=61%	VCAN/SDC1/OGN/B4GALT1
GOBP_NEGATIVE_REGULATION_OF_ADAPTIVE_IMMUNE_RESPONSE	GOBP_NEGATIVE_REGULATION_OF_ADAPTIVE_IMMUNE_RESPONSE	3	-0.910976	-1.35968	0.0498221	0.772255	0.760776	43	tags=67%, list=6%, signal=63%	C4BPB/IL1RL1
GOCC_POSTSYNAPTIC_CYTOSOL	GOCC_POSTSYNAPTIC_CYTOSOL	3	-0.910354	-1.35875	0.0498221	0.772255	0.760776	35	tags=67%, list=5%, signal=64%	DBN1/DAG1
GOCC_REGION_OF_CYTOSOL	GOCC_REGION_OF_CYTOSOL	3	-0.910354	-1.35875	0.0498221	0.772255	0.760776	35	tags=67%, list=5%, signal=64%	DBN1/DAG1
GSE27241_CTRL_VS_DIGOXIN_TREATED_CD4_TCELL_IN_TH17_POLARIZING_CONDITIONS_UP	GSE27241_CTRL_VS_DIGOXIN_TREATED_CD4_TCELL_IN_TH17_POLARIZING_CONDITIONS_UP	3	-0.90953	-1.35752	0.0498221	0.772255	0.760776	51	tags=67%, list=7%, signal=62%	MCAM/ICAM1
LEE_LIVER_CANCER_HEPATOBLAST	LEE_LIVER_CANCER_HEPATOBLAST	3	-0.909153	-1.35696	0.0498221	0.772255	0.760776	67	tags=67%, list=9%, signal=61%	TNC/TIMP1
MARIADASON_REGULATED_BY_HISTONE_ACETYLATION_UP	MARIADASON_REGULATED_BY_HISTONE_ACETYLATION_UP	3	-0.910521	-1.359	0.0498221	0.772255	0.760776	51	tags=67%, list=7%, signal=62%	MCAM/CHI3L1
SOBOLEV_PBMC_PANDEMRIX_AGE_18_64YO_7DY_DN	SOBOLEV_PBMC_PANDEMRIX_AGE_18_64YO_7DY_DN	3	-0.905155	-1.35099	0.0498221	0.772255	0.760776	9	tags=67%, list=1%, signal=66%	SERPINA1/PSMB8
TORCHIA_TARGETS_OF_EWSR1_FLI1_FUSION_TOP20_DN	TORCHIA_TARGETS_OF_EWSR1_FLI1_FUSION_TOP20_DN	3	-0.904715	-1.35033	0.0498221	0.772255	0.760776	38	tags=67%, list=5%, signal=63%	PTGR1/LGALS1
GSE2770_UNTREATED_VS_IL4_TREATED_ACT_CD4_TCELL_2H_UP	GSE2770_UNTREATED_VS_IL4_TREATED_ACT_CD4_TCELL_2H_UP	9	-0.746872	-1.44114	0.049922	0.772255	0.760776	152	tags=56%, list=21%, signal=45%	SLC4A1/FABP1/SNCA/NUP214/LGALS1
REACTOME_METAL_SEQUESTRATION_BY_ANTIMICROBIAL_PROTEINS	REACTOME_METAL_SEQUESTRATION_BY_ANTIMICROBIAL_PROTEINS	4	-0.868852	-1.39805	0.0500306	0.772255	0.760776	101	tags=100%, list=14%, signal=87%	LTF/S100A8/S100A9
GSE2770_UNTREATED_VS_IL12_TREATED_ACT_CD4_TCELL_2H_UP	GSE2770_UNTREATED_VS_IL12_TREATED_ACT_CD4_TCELL_2H_UP	14	-0.682352	-1.45067	0.0500715	0.772255	0.760776	118	tags=36%, list=16%, signal=31%	PYGL/PSMB4/MYO5A/GANAB/CHI3L1
GOBP_SEQUESTERING_OF_METAL_ION	GOBP_SEQUESTERING_OF_METAL_ION	5	-0.845417	-1.43009	0.0501153	0.772255	0.760776	119	tags=100%, list=16%, signal=84%	LCN2/FTL/S100A8/S100A9
GOBP_HEART_GROWTH	GOBP_HEART_GROWTH	3	0.910881	1.42391	0.0501155	0.772255	0.760776	7	tags=33%, list=1%, signal=33%	PI16
GOBP_NEGATIVE_REGULATION_OF_MUSCLE_CELL_DIFFERENTIATION	GOBP_NEGATIVE_REGULATION_OF_MUSCLE_CELL_DIFFERENTIATION	3	0.911323	1.4246	0.0501155	0.772255	0.760776	68	tags=100%, list=9%, signal=91%	PI16/PTBP1/IGF2
GOBP_NEGATIVE_REGULATION_OF_TUMOR_NECROSIS_FACTOR_MEDIATED_SIGNALING_PATHWAY	GOBP_NEGATIVE_REGULATION_OF_TUMOR_NECROSIS_FACTOR_MEDIATED_SIGNALING_PATHWAY	3	0.913986	1.42876	0.0501155	0.772255	0.760776	48	tags=33%, list=7%, signal=31%	GSTP1
HP_AMBIGUOUS_GENITALIA	HP_AMBIGUOUS_GENITALIA	3	0.911323	1.4246	0.0501155	0.772255	0.760776	68	tags=100%, list=9%, signal=91%	PSAT1/TNXB/IGF2
HP_BROAD_FOOT	HP_BROAD_FOOT	3	0.912228	1.42602	0.0501155	0.772255	0.760776	54	tags=67%, list=7%, signal=62%	PSAT1/AIFM1
HP_INFANTILE_SPASMS	HP_INFANTILE_SPASMS	3	0.911421	1.42476	0.0501155	0.772255	0.760776	45	tags=33%, list=6%, signal=31%	TUBA8
HP_ABNORMAL_METABOLISM	HP_ABNORMAL_METABOLISM	5	0.828123	1.4958	0.0501155	0.772255	0.760776	62	tags=60%, list=8%, signal=55%	PRDX1/PGM1/ALDOB
HP_ABNORMAL_PARANASAL_SINUS_MORPHOLOGY	HP_ABNORMAL_PARANASAL_SINUS_MORPHOLOGY	13	-0.694797	-1.46649	0.0501433	0.772255	0.760776	134	tags=38%, list=18%, signal=32%	PRTN3/PSMB4/PSMB9/ELANE/PSMB8
WANG_PROSTATE_CANCER_ANDROGEN_INDEPENDENT	WANG_PROSTATE_CANCER_ANDROGEN_INDEPENDENT	4	0.869903	1.45152	0.0502378	0.772255	0.760776	14	tags=50%, list=2%, signal=49%	DCXR/RPLP2
KIM_LRRC3B_TARGETS	KIM_LRRC3B_TARGETS	10	0.710752	1.55818	0.050264	0.772255	0.760776	10	tags=20%, list=1%, signal=20%	CD59/HLA-C
GOBP_RESPONSE_TO_MUSCLE_INACTIVITY	GOBP_RESPONSE_TO_MUSCLE_INACTIVITY	2	-0.941821	-1.30886	0.0504831	0.772255	0.760776	35	tags=100%, list=5%, signal=96%	DAG1
BIOCARTA_PTEN_PATHWAY	BIOCARTA_PTEN_PATHWAY	1	0.980952	1.29444	0.0505051	0.772255	0.760776	15	tags=100%, list=2%, signal=98%	ILK
KONDO_PROSTATE_CANCER_HCP_WITH_H3K27ME3	KONDO_PROSTATE_CANCER_HCP_WITH_H3K27ME3	1	0.980952	1.29444	0.0505051	0.772255	0.760776	15	tags=100%, list=2%, signal=98%	ILK
SA_PTEN_PATHWAY	SA_PTEN_PATHWAY	1	0.980952	1.29444	0.0505051	0.772255	0.760776	15	tags=100%, list=2%, signal=98%	ILK
WP_DEVELOPMENT_OF_URETERIC_COLLECTION_SYSTEM	WP_DEVELOPMENT_OF_URETERIC_COLLECTION_SYSTEM	1	0.980952	1.29444	0.0505051	0.772255	0.760776	15	tags=100%, list=2%, signal=98%	ILK
WP_EUKARYOTIC_TRANSCRIPTION_INITIATION	WP_EUKARYOTIC_TRANSCRIPTION_INITIATION	1	0.980952	1.29444	0.0505051	0.772255	0.760776	15	tags=100%, list=2%, signal=98%	ILK
WP_FACTORS_AND_PATHWAYS_AFFECTING_INSULINLIKE_GROWTH_FACTOR_IGF1AKT_SIGNALING	WP_FACTORS_AND_PATHWAYS_AFFECTING_INSULINLIKE_GROWTH_FACTOR_IGF1AKT_SIGNALING	1	0.980952	1.29444	0.0505051	0.772255	0.760776	15	tags=100%, list=2%, signal=98%	ILK
WP_GENES_CONTROLLING_NEPHROGENESIS	WP_GENES_CONTROLLING_NEPHROGENESIS	1	0.980952	1.29444	0.0505051	0.772255	0.760776	15	tags=100%, list=2%, signal=98%	ILK
GOBP_CELLULAR_AMINO_ACID_METABOLIC_PROCESS	GOBP_CELLULAR_AMINO_ACID_METABOLIC_PROCESS	29	-0.578961	-1.40344	0.0505181	0.772255	0.760776	130	tags=48%, list=18%, signal=41%	CPS1/PSMB3/ASL/PSMA2/GOT2/PSMA4/PSMB4/PSMB9/PSMA1/BHMT/PSMA3/PSMA5/PSMA7/PSMB8
REACTOME_DEGRADATION_OF_THE_EXTRACELLULAR_MATRIX	REACTOME_DEGRADATION_OF_THE_EXTRACELLULAR_MATRIX	19	-0.635445	-1.42143	0.0506156	0.772255	0.760776	108	tags=47%, list=15%, signal=41%	COL18A1/CDH1/COL6A3/CTSD/SPP1/MMP9/TIMP1/ELANE/COL6A1
BIOCARTA_LYM_PATHWAY	BIOCARTA_LYM_PATHWAY	4	-0.856629	-1.37838	0.0506757	0.772255	0.760776	28	tags=50%, list=4%, signal=48%	VCAM1/ICAM1
GOBP_NEGATIVE_REGULATION_OF_VIRAL_ENTRY_INTO_HOST_CELL	GOBP_NEGATIVE_REGULATION_OF_VIRAL_ENTRY_INTO_HOST_CELL	4	-0.856648	-1.37841	0.0506757	0.772255	0.760776	22	tags=50%, list=3%, signal=49%	APCS/PTX3
GSE18893_CTRL_VS_TNF_TREATED_TREG_2H_DN	GSE18893_CTRL_VS_TNF_TREATED_TREG_2H_DN	4	-0.856542	-1.37824	0.0506757	0.772255	0.760776	8	tags=50%, list=1%, signal=50%	AGT/SERPINB1
OLSSON_E2F3_TARGETS_UP	OLSSON_E2F3_TARGETS_UP	4	-0.856904	-1.37882	0.0506757	0.772255	0.760776	107	tags=75%, list=15%, signal=64%	WFDC2/DAG1/S100A8
ELVIDGE_HYPOXIA_UP	ELVIDGE_HYPOXIA_UP	12	0.669285	1.52634	0.0507482	0.772255	0.760776	74	tags=33%, list=10%, signal=30%	CD59/SERPINE1/PGM1/PFKP
GSE15930_STIM_VS_STIM_AND_IFNAB_24H_CD8_T_CELL_UP	GSE15930_STIM_VS_STIM_AND_IFNAB_24H_CD8_T_CELL_UP	12	0.670925	1.53008	0.0507482	0.772255	0.760776	71	tags=42%, list=10%, signal=38%	CDH13/NT5DC3/CNN2/ADAMDEC1/MATR3
GSE17721_0.5H_VS_24H_POLYIC_BMDC_DN	GSE17721_0.5H_VS_24H_POLYIC_BMDC_DN	7	0.793965	1.59091	0.050858	0.773279	0.761785	133	tags=71%, list=18%, signal=59%	PRDX1/CAPZA1/MSN/PGD/PON3
GOBP_REGULATION_OF_BIOLOGICAL_PROCESS_INVOLVED_IN_SYMBIOTIC_INTERACTION	GOBP_REGULATION_OF_BIOLOGICAL_PROCESS_INVOLVED_IN_SYMBIOTIC_INTERACTION	11	-0.72465	-1.45716	0.0509745	0.773596	0.762097	60	tags=55%, list=8%, signal=51%	P4HB/MBL2/LTF/DHX9/LGALS1/PTX3
GSE24142_EARLY_THYMIC_PROGENITOR_VS_DN2_THYMOCYTE_FETAL_DN	GSE24142_EARLY_THYMIC_PROGENITOR_VS_DN2_THYMOCYTE_FETAL_DN	11	-0.719522	-1.44685	0.0509745	0.773596	0.762097	108	tags=36%, list=15%, signal=31%	COL6A3/MCAM/LGALS1/S100A9
LEE_LIVER_CANCER_SURVIVAL_UP	LEE_LIVER_CANCER_SURVIVAL_UP	30	-0.575736	-1.40515	0.0510204	0.773596	0.762097	77	tags=20%, list=10%, signal=19%	CES1/PKLR/APOA5/TSKU/S100A8/SELENBP1
GOCC_VACUOLE	GOCC_VACUOLE	63	-0.499697	-1.35815	0.0511034	0.773596	0.762097	159	tags=32%, list=22%, signal=27%	VCAN/YWHAB/VNN1/HSP90AB1/PRTN3/DEFA3/FTH1/SRGN/ACTR2/SNCA/CTSD/SDC1/MYO5A/OGN/GDI2/FTL/MPO/ELANE/B4GALT1/COL6A1
CHAUHAN_RESPONSE_TO_METHOXYESTRADIOL_DN	CHAUHAN_RESPONSE_TO_METHOXYESTRADIOL_DN	18	-0.649441	-1.43381	0.0512465	0.773596	0.762097	209	tags=56%, list=28%, signal=41%	NAP1L1/UBC/ARHGDIB/MDH1/YWHAB/HSP90AB1/PDLIM1/LGALS1/LTA4H/NUCB1
REACTOME_TRANSPORT_OF_SMALL_MOLECULES	REACTOME_TRANSPORT_OF_SMALL_MOLECULES	55	-0.509985	-1.35628	0.051374	0.773596	0.762097	188	tags=38%, list=26%, signal=31%	PSMA6/P4HB/PCSK9/PSMB5/SLC4A1/LIPC/PSMB3/PSMA2/FTH1/PSMA4/LCN2/PSMB4/MB/PSMB9/PSMA1/APOA5/PSMA3/FTL/PSMA5/PSMA7/PSMB8
GOMF_LIPASE_BINDING	GOMF_LIPASE_BINDING	2	-0.937226	-1.30248	0.0513761	0.773596	0.762097	42	tags=100%, list=6%, signal=95%	APOA5
ELVIDGE_HYPOXIA_BY_DMOG_UP	ELVIDGE_HYPOXIA_BY_DMOG_UP	11	0.670653	1.50212	0.0514581	0.773596	0.762097	74	tags=36%, list=10%, signal=33%	CD59/SERPINE1/PGM1/PFKP
BURTON_ADIPOGENESIS_2	BURTON_ADIPOGENESIS_2	9	-0.744525	-1.43661	0.0514821	0.773596	0.762097	65	tags=33%, list=9%, signal=31%	SDC1/IL1RL1/TIMP1
DAVICIONI_MOLECULAR_ARMS_VS_ERMS_DN	DAVICIONI_MOLECULAR_ARMS_VS_ERMS_DN	4	-0.867792	-1.39634	0.0515544	0.773596	0.762097	65	tags=75%, list=9%, signal=69%	FABP5/SDC1/TSKU
XIE_ST_HSC_S1PR3_OE_DN	XIE_ST_HSC_S1PR3_OE_DN	4	-0.867984	-1.39665	0.0515544	0.773596	0.762097	77	tags=50%, list=10%, signal=45%	PKLR/SELENBP1
GSE17721_12H_VS_24H_GARDIQUIMOD_BMDC_DN	GSE17721_12H_VS_24H_GARDIQUIMOD_BMDC_DN	13	-0.694021	-1.46486	0.0515759	0.773596	0.762097	53	tags=54%, list=7%, signal=51%	CBR3/IGFBP4/ACAA2/GANAB/PRKCSH/DDT/SELENBP1
GOBP_NEGATIVE_REGULATION_OF_LEUKOCYTE_CHEMOTAXIS	GOBP_NEGATIVE_REGULATION_OF_LEUKOCYTE_CHEMOTAXIS	2	-0.939692	-1.30591	0.0515866	0.773596	0.762097	20	tags=100%, list=3%, signal=98%	DDT
GOBP_NEGATIVE_REGULATION_OF_MACROPHAGE_CHEMOTAXIS	GOBP_NEGATIVE_REGULATION_OF_MACROPHAGE_CHEMOTAXIS	2	-0.939692	-1.30591	0.0515866	0.773596	0.762097	20	tags=100%, list=3%, signal=98%	DDT
GOBP_NEGATIVE_REGULATION_OF_MACROPHAGE_MIGRATION	GOBP_NEGATIVE_REGULATION_OF_MACROPHAGE_MIGRATION	2	-0.939692	-1.30591	0.0515866	0.773596	0.762097	20	tags=100%, list=3%, signal=98%	DDT
GOBP_POSITIVE_REGULATION_OF_RECEPTOR_SIGNALING_PATHWAY_VIA_STAT	GOBP_POSITIVE_REGULATION_OF_RECEPTOR_SIGNALING_PATHWAY_VIA_STAT	3	-0.900083	-1.34342	0.0516014	0.773596	0.762097	10	tags=67%, list=1%, signal=66%	AGT/CSH2
GOBP_REGULATION_OF_RECEPTOR_SIGNALING_PATHWAY_VIA_STAT	GOBP_REGULATION_OF_RECEPTOR_SIGNALING_PATHWAY_VIA_STAT	3	-0.900083	-1.34342	0.0516014	0.773596	0.762097	10	tags=67%, list=1%, signal=66%	AGT/CSH2
GOBP_ACUTE_INFLAMMATORY_RESPONSE	GOBP_ACUTE_INFLAMMATORY_RESPONSE	32	-0.572	-1.40763	0.0518987	0.774986	0.763467	171	tags=34%, list=23%, signal=28%	MBL2/CRP/VNN1/SAA1/SAA2/REG3A/CD163/ICAM1/S100A8/ELANE/B4GALT1
GSE22935_24H_VS_48H_MBOVIS_BCG_STIM_MACROPHAGE_DN	GSE22935_24H_VS_48H_MBOVIS_BCG_STIM_MACROPHAGE_DN	7	-0.783717	-1.41158	0.0519263	0.774986	0.763467	16	tags=57%, list=2%, signal=56%	HNRNPC/S100A8/B4GALT1/MRC1
GSE40666_UNTREATED_VS_IFNA_STIM_STAT1_KO_CD8_TCELL_90MIN_UP	GSE40666_UNTREATED_VS_IFNA_STIM_STAT1_KO_CD8_TCELL_90MIN_UP	7	-0.783801	-1.41173	0.0519263	0.774986	0.763467	25	tags=29%, list=3%, signal=28%	MMP9/SERPINB1
HOWARD_PBMC_INACT_MONOV_INFLUENZA_A_INDONESIA_05_2005_H5N1_AGE_19_39YO_AS03_ADJUVANT_VS_BUFFER_1DY_UP	HOWARD_PBMC_INACT_MONOV_INFLUENZA_A_INDONESIA_05_2005_H5N1_AGE_19_39YO_AS03_ADJUVANT_VS_BUFFER_1DY_UP	28	-0.579829	-1.39456	0.0520833	0.774986	0.763467	125	tags=32%, list=17%, signal=28%	CES1/SRGN/TYMP/PSMA4/LAP3/PSMB9/ICAM1/S100A8/S100A9
REACTOME_ORGANELLE_BIOGENESIS_AND_MAINTENANCE	REACTOME_ORGANELLE_BIOGENESIS_AND_MAINTENANCE	18	0.577862	1.54114	0.0520953	0.774986	0.763467	46	tags=28%, list=6%, signal=27%	RAB11A/TUBB8/CCT2/TUBA8/YWHAE
GAL_LEUKEMIC_STEM_CELL_UP	GAL_LEUKEMIC_STEM_CELL_UP	4	-0.850858	-1.36909	0.0523649	0.774986	0.763467	5	tags=50%, list=1%, signal=50%	AGT/COL6A1
GSE26669_CD4_VS_CD8_TCELL_IN_MLR_COSTIM_BLOCK_DN	GSE26669_CD4_VS_CD8_TCELL_IN_MLR_COSTIM_BLOCK_DN	4	-0.854193	-1.37446	0.0523649	0.774986	0.763467	11	tags=50%, list=1%, signal=50%	IGFBP6/B4GALT1
GSE32034_LY6C_HIGH_VS_LOW_MONOCYTE_DN	GSE32034_LY6C_HIGH_VS_LOW_MONOCYTE_DN	4	-0.852388	-1.37156	0.0523649	0.774986	0.763467	59	tags=75%, list=8%, signal=69%	HLA-B/PSMB9/PSMB8
GSE7768_OVA_ALONE_VS_OVA_WITH_LPS_IMMUNIZED_MOUSE_WHOLE_SPLEEN_6H_DN	GSE7768_OVA_ALONE_VS_OVA_WITH_LPS_IMMUNIZED_MOUSE_WHOLE_SPLEEN_6H_DN	4	-0.852469	-1.37169	0.0523649	0.774986	0.763467	28	tags=50%, list=4%, signal=48%	CD14/ICAM1
HP_SCHIZOPHRENIA	HP_SCHIZOPHRENIA	4	-0.851286	-1.36978	0.0523649	0.774986	0.763467	91	tags=75%, list=12%, signal=66%	KRT86/SNCA/CHI3L1
GSE15330_LYMPHOID_MULTIPOTENT_VS_MEGAKARYOCYTE_ERYTHROID_PROGENITOR_IKAROS_KO_DN	GSE15330_LYMPHOID_MULTIPOTENT_VS_MEGAKARYOCYTE_ERYTHROID_PROGENITOR_IKAROS_KO_DN	12	-0.701872	-1.45067	0.0525547	0.774986	0.763467	32	tags=42%, list=4%, signal=41%	NRP1/SRGN/LGALS1/S100A8/S100A9
GSE42088_UNINF_VS_LEISHMANIA_INF_DC_8H_UP	GSE42088_UNINF_VS_LEISHMANIA_INF_DC_8H_UP	26	-0.595179	-1.41457	0.0525624	0.774986	0.763467	36	tags=35%, list=5%, signal=34%	PSMB5/NRP1/ENPP2/MT1X/FTL/VSIG4/MMP9/MRC1/CHI3L1
GOBP_NEGATIVE_REGULATION_OF_CELL_CYCLE_PROCESS	GOBP_NEGATIVE_REGULATION_OF_CELL_CYCLE_PROCESS	18	-0.647678	-1.42992	0.0526316	0.774986	0.763467	150	tags=72%, list=20%, signal=59%	PSMB5/HSP90AB1/NPM1/PSMB3/PSMA2/PSMA4/PSMB4/PSMB9/PSMA1/PSMA3/PSMA5/PSMA7/PSMB8
GSE29949_MICROGLIA_BRAIN_VS_CD8_NEG_DC_SPLEEN_DN	GSE29949_MICROGLIA_BRAIN_VS_CD8_NEG_DC_SPLEEN_DN	8	-0.762372	-1.43539	0.0528	0.774986	0.763467	151	tags=75%, list=21%, signal=60%	CDH1/PDLIM1/KRT16/PKLR/LTA4H/KRT9
GSE40443_INDUCED_VS_TOTAL_TREG_UP	GSE40443_INDUCED_VS_TOTAL_TREG_UP	8	-0.762796	-1.43619	0.0528	0.774986	0.763467	87	tags=38%, list=12%, signal=33%	HNRNPA1/ICAM1/MMP9
GSE17721_0.5H_VS_12H_POLYIC_BMDC_UP	GSE17721_0.5H_VS_12H_POLYIC_BMDC_UP	14	-0.679425	-1.44445	0.0529328	0.774986	0.763467	33	tags=29%, list=4%, signal=28%	CD93/PRG2/TIMP1/SELENBP1
GSE17721_LPS_VS_PAM3CSK4_0.5H_BMDC_DN	GSE17721_LPS_VS_PAM3CSK4_0.5H_BMDC_DN	13	-0.692966	-1.46263	0.0530086	0.774986	0.763467	143	tags=38%, list=19%, signal=32%	PDLIM1/HNRNPM/SRGN/FTL/PSMA5
GSE3565_DUSP1_VS_WT_SPLENOCYTES_DN	GSE3565_DUSP1_VS_WT_SPLENOCYTES_DN	8	0.73011	1.50554	0.0530401	0.774986	0.763467	92	tags=38%, list=12%, signal=33%	PTBP1/EEF2/PCBP1
GOBP_ANTERIOR_COMMISSURE_MORPHOGENESIS	GOBP_ANTERIOR_COMMISSURE_MORPHOGENESIS	1	-0.979592	-1.29631	0.0532544	0.774986	0.763467	17	tags=100%, list=2%, signal=98%
GOBP_CENTRAL_NERVOUS_SYSTEM_PROJECTION_NEURON_AXONOGENESIS	GOBP_CENTRAL_NERVOUS_SYSTEM_PROJECTION_NEURON_AXONOGENESIS	1	-0.979592	-1.29631	0.0532544	0.774986	0.763467	17	tags=100%, list=2%, signal=98%
GOBP_CHONDROCYTE_DEVELOPMENT_INVOLVED_IN_ENDOCHONDRAL_BONE_MORPHOGENESIS	GOBP_CHONDROCYTE_DEVELOPMENT_INVOLVED_IN_ENDOCHONDRAL_BONE_MORPHOGENESIS	1	-0.979592	-1.29631	0.0532544	0.774986	0.763467	17	tags=100%, list=2%, signal=98%
GOBP_CHONDROCYTE_DIFFERENTIATION_INVOLVED_IN_ENDOCHONDRAL_BONE_MORPHOGENESIS	GOBP_CHONDROCYTE_DIFFERENTIATION_INVOLVED_IN_ENDOCHONDRAL_BONE_MORPHOGENESIS	1	-0.979592	-1.29631	0.0532544	0.774986	0.763467	17	tags=100%, list=2%, signal=98%
GOBP_CORPUS_CALLOSUM_DEVELOPMENT	GOBP_CORPUS_CALLOSUM_DEVELOPMENT	1	-0.979592	-1.29631	0.0532544	0.774986	0.763467	17	tags=100%, list=2%, signal=98%
GOBP_CORPUS_CALLOSUM_MORPHOGENESIS	GOBP_CORPUS_CALLOSUM_MORPHOGENESIS	1	-0.979592	-1.29631	0.0532544	0.774986	0.763467	17	tags=100%, list=2%, signal=98%
GOBP_ENERGY_HOMEOSTASIS	GOBP_ENERGY_HOMEOSTASIS	1	-0.979592	-1.29631	0.0532544	0.774986	0.763467	17	tags=100%, list=2%, signal=98%
GOBP_GROWTH_PLATE_CARTILAGE_CHONDROCYTE_DEVELOPMENT	GOBP_GROWTH_PLATE_CARTILAGE_CHONDROCYTE_DEVELOPMENT	1	-0.979592	-1.29631	0.0532544	0.774986	0.763467	17	tags=100%, list=2%, signal=98%
GOBP_GROWTH_PLATE_CARTILAGE_CHONDROCYTE_DIFFERENTIATION	GOBP_GROWTH_PLATE_CARTILAGE_CHONDROCYTE_DIFFERENTIATION	1	-0.979592	-1.29631	0.0532544	0.774986	0.763467	17	tags=100%, list=2%, signal=98%
GOBP_HIPPOCAMPUS_DEVELOPMENT	GOBP_HIPPOCAMPUS_DEVELOPMENT	1	-0.979592	-1.29631	0.0532544	0.774986	0.763467	17	tags=100%, list=2%, signal=98%
GOBP_LATERAL_VENTRICLE_DEVELOPMENT	GOBP_LATERAL_VENTRICLE_DEVELOPMENT	1	-0.979592	-1.29631	0.0532544	0.774986	0.763467	17	tags=100%, list=2%, signal=98%
GOBP_LIMBIC_SYSTEM_DEVELOPMENT	GOBP_LIMBIC_SYSTEM_DEVELOPMENT	1	-0.979592	-1.29631	0.0532544	0.774986	0.763467	17	tags=100%, list=2%, signal=98%
GOBP_MYOFIBROBLAST_DIFFERENTIATION	GOBP_MYOFIBROBLAST_DIFFERENTIATION	1	-0.979592	-1.29631	0.0532544	0.774986	0.763467	17	tags=100%, list=2%, signal=98%
GOBP_NEGATIVE_REGULATION_OF_TRANSFORMING_GROWTH_FACTOR_BETA1_PRODUCTION	GOBP_NEGATIVE_REGULATION_OF_TRANSFORMING_GROWTH_FACTOR_BETA1_PRODUCTION	1	-0.979592	-1.29631	0.0532544	0.774986	0.763467	17	tags=100%, list=2%, signal=98%
GOBP_REGULATION_OF_HAIR_CYCLE	GOBP_REGULATION_OF_HAIR_CYCLE	1	-0.979592	-1.29631	0.0532544	0.774986	0.763467	17	tags=100%, list=2%, signal=98%
GOBP_VENTRICULAR_SYSTEM_DEVELOPMENT	GOBP_VENTRICULAR_SYSTEM_DEVELOPMENT	1	-0.979592	-1.29631	0.0532544	0.774986	0.763467	17	tags=100%, list=2%, signal=98%
GOMF_TETRAPYRROLE_BINDING	GOMF_TETRAPYRROLE_BINDING	9	-0.769478	-1.48476	0.0532703	0.774986	0.763467	78	tags=33%, list=11%, signal=30%	CAT/MB/MPO
WANG_LMO4_TARGETS_UP	WANG_LMO4_TARGETS_UP	19	-0.633124	-1.41624	0.0533516	0.774986	0.763467	117	tags=32%, list=16%, signal=27%	MT1X/HNRNPA1/MB/IGFBP2/PRKCSH/SELENBP1
GSE29164_DAY3_VS_DAY7_UNTREATED_MELANOMA_DN	GSE29164_DAY3_VS_DAY7_UNTREATED_MELANOMA_DN	4	-0.867445	-1.39578	0.0535961	0.774986	0.763467	2	tags=50%, list=0%, signal=50%	PSMA6/NUCB1
GSE11924_TFH_VS_TH1_CD4_TCELL_UP	GSE11924_TFH_VS_TH1_CD4_TCELL_UP	7	-0.783025	-1.41034	0.0536013	0.774986	0.763467	90	tags=43%, list=12%, signal=38%	CORO1A/ACTR3/B4GALT1
GOBP_NEGATIVE_REGULATION_OF_DEFENSE_RESPONSE	GOBP_NEGATIVE_REGULATION_OF_DEFENSE_RESPONSE	20	-0.624091	-1.41982	0.0536193	0.774986	0.763467	147	tags=30%, list=20%, signal=25%	SAA1/KRT1/PSMB4/PSMA1/VSIG4/ELANE
GOCC_VESICLE_LUMEN	GOCC_VESICLE_LUMEN	105	-0.451528	-1.3046	0.0539648	0.774986	0.763467	140	tags=21%, list=19%, signal=20%	MMRN1/PRTN3/DEFA3/PSMA2/PYGL/SRGN/GPI/LCN2/ACTR2/CTSD/LTF/GDI2/FTL/MPO/PTX3/TIMP1/PSMA5/S100A8/ELANE/SERPINB1/CHI3L1/S100A9
GOBP_LEUKOCYTE_MEDIATED_CYTOTOXICITY	GOBP_LEUKOCYTE_MEDIATED_CYTOTOXICITY	11	-0.710633	-1.42898	0.053973	0.774986	0.763467	90	tags=73%, list=12%, signal=65%	B2M/AZGP1/TUBB/PVR/HLA-B/CORO1A/ICAM1/ELANE
GOMF_STEROID_BINDING	GOMF_STEROID_BINDING	11	-0.711501	-1.43072	0.053973	0.774986	0.763467	42	tags=18%, list=6%, signal=17%	CETP/APOA5
GSE30083_SP1_VS_SP3_THYMOCYTE_UP	GSE30083_SP1_VS_SP3_THYMOCYTE_UP	11	-0.708339	-1.42437	0.053973	0.774986	0.763467	36	tags=27%, list=5%, signal=26%	FTL/MMP9/NUCB1
GSE44649_NAIVE_VS_ACTIVATED_CD8_TCELL_UP	GSE44649_NAIVE_VS_ACTIVATED_CD8_TCELL_UP	11	-0.7145	-1.43675	0.053973	0.774986	0.763467	79	tags=55%, list=11%, signal=49%	PDLIM1/HINT1/CHGA/IGFBP1/DDT/PSMB8
GSE7568_CTRL_VS_24H_TGFB_TREATED_MACROPHAGES_WITH_IL4_AND_DEXAMETHASONE_DN	GSE7568_CTRL_VS_24H_TGFB_TREATED_MACROPHAGES_WITH_IL4_AND_DEXAMETHASONE_DN	11	-0.712883	-1.4335	0.053973	0.774986	0.763467	182	tags=45%, list=25%, signal=35%	HNRNPC/PDLIM1/SPTB/CD163/S100A8
LEE_LIVER_CANCER_DENA_UP	LEE_LIVER_CANCER_DENA_UP	11	-0.712477	-1.43269	0.053973	0.774986	0.763467	101	tags=36%, list=14%, signal=32%	LCN2/SPP1/IGFBP1/S100A9
GSE22313_HEALTHY_VS_SLE_MOUSE_CD4_TCELL_DN	GSE22313_HEALTHY_VS_SLE_MOUSE_CD4_TCELL_DN	12	-0.698819	-1.44436	0.0540146	0.774986	0.763467	46	tags=58%, list=6%, signal=56%	SORD/CD163/GANAB/CD93/LTA4H/VSIG4/SERPINB1
GSE36888_STAT5_AB_KNOCKIN_VS_WT_TCELL_IL2_TREATED_17H_DN	GSE36888_STAT5_AB_KNOCKIN_VS_WT_TCELL_IL2_TREATED_17H_DN	12	-0.69641	-1.43938	0.0540146	0.774986	0.763467	119	tags=42%, list=16%, signal=36%	FTH1/PYGL/CTSD/MPO/SERPINB1
HUPER_BREAST_BASAL_VS_LUMINAL_DN	HUPER_BREAST_BASAL_VS_LUMINAL_DN	12	-0.697908	-1.44247	0.0540146	0.774986	0.763467	155	tags=50%, list=21%, signal=40%	IGFBP4/WFDC2/LCN2/KRT86/PSMB9/PSMB8
KARLSSON_TGFB1_TARGETS_DN	KARLSSON_TGFB1_TARGETS_DN	12	-0.700717	-1.44828	0.0540146	0.774986	0.763467	155	tags=50%, list=21%, signal=40%	IGFBP4/FTH1/GOLM1/ACAA2/DAG1/COL6A1
DELACROIX_RAR_BOUND_ES	DELACROIX_RAR_BOUND_ES	18	-0.646829	-1.42805	0.0540166	0.774986	0.763467	184	tags=56%, list=25%, signal=43%	MTHFD1/GSR/CDH1/PDLIM1/YWHAG/WFDC2/CTSD/IGFBP2/SPP1/DAG1
GOBP_REGULATION_OF_DIGESTIVE_SYSTEM_PROCESS	GOBP_REGULATION_OF_DIGESTIVE_SYSTEM_PROCESS	4	-0.849261	-1.36652	0.0540541	0.774986	0.763467	105	tags=50%, list=14%, signal=43%	TYMP/APOA5
GSE16755_CTRL_VS_IFNA_TREATED_MAC_DN	GSE16755_CTRL_VS_IFNA_TREATED_MAC_DN	10	-0.734509	-1.4551	0.0541353	0.774986	0.763467	189	tags=80%, list=26%, signal=60%	SOD2/PSMA6/IGFBP4/PSMA2/LAP3/PSMB9/ICAM1/PSMB8
GOBP_MACROPHAGE_DIFFERENTIATION	GOBP_MACROPHAGE_DIFFERENTIATION	5	-0.823976	-1.39382	0.0541455	0.774986	0.763467	89	tags=40%, list=12%, signal=35%	CSF1R/MMP9
QI_PBMC_ZOSTAVAX_AGE_50_75YO_CORRELATED_WITH_T_CELL_RESPONSES_1D_INFORMATIVE_OF_LONG_TERM_RESPONSES_NEGATIVE	QI_PBMC_ZOSTAVAX_AGE_50_75YO_CORRELATED_WITH_T_CELL_RESPONSES_1D_INFORMATIVE_OF_LONG_TERM_RESPONSES_NEGATIVE	5	-0.822326	-1.39103	0.0541455	0.774986	0.763467	36	tags=40%, list=5%, signal=38%	FTL/LGALS1
GOBP_COPII_COATED_VESICLE_BUDDING	GOBP_COPII_COATED_VESICLE_BUDDING	3	0.90889	1.4208	0.0542065	0.774986	0.763467	1	tags=33%, list=0%, signal=33%	CD59
GOBP_VESICLE_BUDDING_FROM_MEMBRANE	GOBP_VESICLE_BUDDING_FROM_MEMBRANE	3	0.90889	1.4208	0.0542065	0.774986	0.763467	1	tags=33%, list=0%, signal=33%	CD59
GOBP_VESICLE_TARGETING	GOBP_VESICLE_TARGETING	3	0.90889	1.4208	0.0542065	0.774986	0.763467	1	tags=33%, list=0%, signal=33%	CD59
GOBP_VESICLE_TARGETING_TO_FROM_OR_WITHIN_GOLGI	GOBP_VESICLE_TARGETING_TO_FROM_OR_WITHIN_GOLGI	3	0.90889	1.4208	0.0542065	0.774986	0.763467	1	tags=33%, list=0%, signal=33%	CD59
GOBP_REGULATION_OF_INTRINSIC_APOPTOTIC_SIGNALING_PATHWAY	GOBP_REGULATION_OF_INTRINSIC_APOPTOTIC_SIGNALING_PATHWAY	16	-0.661432	-1.44352	0.0543175	0.775965	0.764431	25	tags=44%, list=3%, signal=43%	SOD2/P4HB/HYOU1/VNN1/MMP9/S100A8/S100A9
GOBP_GLYCEROLIPID_METABOLIC_PROCESS	GOBP_GLYCEROLIPID_METABOLIC_PROCESS	29	-0.573057	-1.38913	0.0544041	0.776593	0.765049	213	tags=38%, list=29%, signal=28%	FABP4/GPD1/PCSK9/LIPC/ENPP2/CPS1/FABP3/FABP1/CSF1R/APOA5/PLA2G2A
HOEK_B_CELL_2011_2012_TIV_ADULT_1DY_UP	HOEK_B_CELL_2011_2012_TIV_ADULT_1DY_UP	1	0.979592	1.29264	0.0545455	0.776982	0.765433	16	tags=100%, list=2%, signal=98%	IGLV10-54
GSE15930_STIM_VS_STIM_AND_IFNAB_48H_CD8_T_CELL_DN	GSE15930_STIM_VS_STIM_AND_IFNAB_48H_CD8_T_CELL_DN	9	0.720751	1.5445	0.0545579	0.776982	0.765433	10	tags=22%, list=1%, signal=22%	NT5DC3/HLA-C
GSE37301_RAG2_KO_VS_RAG2_AND_ETS1_KO_NK_CELL_UP	GSE37301_RAG2_KO_VS_RAG2_AND_ETS1_KO_NK_CELL_UP	35	-0.557526	-1.3915	0.0545685	0.776982	0.765433	213	tags=31%, list=29%, signal=23%	FABP4/HPD/NID1/RNASE4/SAA1/CPS1/LCN2/ACTR2/MB/APOA5/COL6A1
GSE36888_UNTREATED_VS_IL2_TREATED_STAT5_AB_KNOCKIN_TCELL_6H_UP	GSE36888_UNTREATED_VS_IL2_TREATED_STAT5_AB_KNOCKIN_TCELL_6H_UP	9	-0.743216	-1.43409	0.0546022	0.776982	0.765433	90	tags=78%, list=12%, signal=69%	FCGR2A/C2CD3/SOD2/CORO1A/CLIC1/S100A8/S100A9
GOBP_MORPHOGENESIS_OF_A_POLARIZED_EPITHELIUM	GOBP_MORPHOGENESIS_OF_A_POLARIZED_EPITHELIUM	19	-0.631075	-1.41166	0.0547196	0.778044	0.766479	129	tags=68%, list=18%, signal=58%	PSMA6/ACTG1/PSMB5/PSMB3/PSMA2/PSMA4/PSMB4/PSMB9/PSMA1/PSMA3/PSMA5/PSMA7/PSMB8
HP_ABNORMALITY_OF_THE_EXTERNAL_NOSE	HP_ABNORMALITY_OF_THE_EXTERNAL_NOSE	15	0.585256	1.47359	0.054804	0.778228	0.766661	54	tags=27%, list=7%, signal=25%	PSAT1/YWHAE/RAC1/AIFM1
GOBP_VIRAL_LIFE_CYCLE	GOBP_VIRAL_LIFE_CYCLE	30	-0.569878	-1.39085	0.0548469	0.778228	0.766661	60	tags=37%, list=8%, signal=35%	NRP1/HSPA1B/HSP90AB1/NCAM1/LTF/NUP214/DAG1/LGALS1/ICAM1/PTX3/MRC1
GOBP_POSITIVE_REGULATION_OF_PROTEIN_PHOSPHORYLATION	GOBP_POSITIVE_REGULATION_OF_PROTEIN_PHOSPHORYLATION	44	-0.526472	-1.35018	0.0549313	0.778228	0.766661	89	tags=32%, list=12%, signal=30%	NRP1/HSP90AB1/SAA1/ENPP2/CSF1R/SNCA/LTF/TXN/DAG1/ICAM1/MMP9/ELANE/CSH2/CHI3L1
GOMF_GLYCOSAMINOGLYCAN_BINDING	GOMF_GLYCOSAMINOGLYCAN_BINDING	44	-0.526742	-1.35088	0.0549313	0.778228	0.766661	163	tags=27%, list=22%, signal=23%	NRP1/VCAN/SAA1/LIPC/REG3A/FSTL1/REG1A/LTF/APOA5/MPO/PRG2/ELANE
HP_JOINT_HEMORRHAGE	HP_JOINT_HEMORRHAGE	11	0.666124	1.49197	0.0550377	0.778228	0.766661	50	tags=18%, list=7%, signal=17%	SERPINE1/F7
GOMF_CYTOKINE_RECEPTOR_ACTIVITY	GOMF_CYTOKINE_RECEPTOR_ACTIVITY	2	-0.936243	-1.30111	0.0550459	0.778228	0.766661	43	tags=100%, list=6%, signal=94%	IL1RL1
HP_DECREASED_LEVEL_OF_GABA_IN_SERUM	HP_DECREASED_LEVEL_OF_GABA_IN_SERUM	2	-0.935877	-1.3006	0.0550459	0.778228	0.766661	27	tags=100%, list=4%, signal=97%	MPO
GOBP_PERIPHERAL_NERVOUS_SYSTEM_AXON_REGENERATION	GOBP_PERIPHERAL_NERVOUS_SYSTEM_AXON_REGENERATION	3	-0.896936	-1.33872	0.0551601	0.778228	0.766661	67	tags=67%, list=9%, signal=61%	APOD/TNC
GOBP_REGULATION_OF_DEFENSE_RESPONSE_TO_VIRUS	GOBP_REGULATION_OF_DEFENSE_RESPONSE_TO_VIRUS	3	-0.896643	-1.33829	0.0551601	0.778228	0.766661	48	tags=67%, list=7%, signal=63%	HSP90AA1/DHX9
PARK_APL_PATHOGENESIS_UP	PARK_APL_PATHOGENESIS_UP	3	-0.897681	-1.33983	0.0551601	0.778228	0.766661	79	tags=100%, list=11%, signal=90%	PSMB9/MPO
GSE32986_GMCSF_AND_CURDLAN_LOWDOSE_VS_GMCSF_AND_CURDLAN_HIGHDOSE_STIM_DC_DN	GSE32986_GMCSF_AND_CURDLAN_LOWDOSE_VS_GMCSF_AND_CURDLAN_HIGHDOSE_STIM_DC_DN	7	-0.782043	-1.40857	0.0552764	0.778417	0.766846	35	tags=71%, list=5%, signal=69%	LIMS1/PTGDS/DAG1/LGALS1/LTA4H
DURAND_STROMA_S_UP	DURAND_STROMA_S_UP	12	-0.695862	-1.43824	0.0554745	0.778417	0.766846	170	tags=58%, list=23%, signal=46%	ADAM12/PAPPA/NCAM1/SPP1/IL1RL1/PTX3/SERPINB1
REACTOME_NON_INTEGRIN_MEMBRANE_ECM_INTERACTIONS	REACTOME_NON_INTEGRIN_MEMBRANE_ECM_INTERACTIONS	10	-0.733014	-1.45214	0.0556391	0.778417	0.766846	67	tags=30%, list=9%, signal=28%	TNC/SDC1/DAG1
LEE_LIVER_CANCER_MYC_DN	LEE_LIVER_CANCER_MYC_DN	16	-0.658952	-1.43811	0.0557103	0.778417	0.766846	72	tags=25%, list=10%, signal=23%	IGFBP2/REG1A/BHMT/ELANE
BAE_BRCA1_TARGETS_UP	BAE_BRCA1_TARGETS_UP	4	-0.847399	-1.36353	0.0557432	0.778417	0.766846	94	tags=50%, list=13%, signal=44%	LSM1/HINT1
GOMF_OLIGOSACCHARIDE_BINDING	GOMF_OLIGOSACCHARIDE_BINDING	5	-0.819401	-1.38608	0.0558376	0.778417	0.766846	113	tags=60%, list=15%, signal=51%	REG3A/REG1A/LGALS1
LI_INDUCED_T_TO_NATURAL_KILLER_DN	LI_INDUCED_T_TO_NATURAL_KILLER_DN	5	-0.81876	-1.385	0.0558376	0.778417	0.766846	5	tags=40%, list=1%, signal=40%	FBP1/COL6A1
GSE17721_LPS_VS_POLYIC_24H_BMDC_UP	GSE17721_LPS_VS_POLYIC_24H_BMDC_UP	13	-0.68818	-1.45253	0.0558739	0.778417	0.766846	36	tags=31%, list=5%, signal=30%	FTL/DDT/B4GALT1/NUCB1
GSE24574_BCL6_HIGH_VS_LOW_TFH_CD4_TCELL_UP	GSE24574_BCL6_HIGH_VS_LOW_TFH_CD4_TCELL_UP	13	0.642381	1.50368	0.0558856	0.778417	0.766846	109	tags=46%, list=15%, signal=40%	CD59/RPLP2/MATR3/SPP2/RPS12/TPM2
GOBP_DEFENSE_RESPONSE_TO_BACTERIUM	GOBP_DEFENSE_RESPONSE_TO_BACTERIUM	72	-0.482553	-1.33403	0.0559361	0.778417	0.766846	64	tags=18%, list=9%, signal=18%	DEFA3/WFDC2/LCN2/CHGA/LTF/IGHV3-16/IGHA2/PLA2G2A/MPO/PRG2/S100A8/ELANE/S100A9
GSE21546_WT_VS_SAP1A_KO_ANTI_CD3_STIM_DP_THYMOCYTES_UP	GSE21546_WT_VS_SAP1A_KO_ANTI_CD3_STIM_DP_THYMOCYTES_UP	23	-0.601033	-1.40447	0.0559896	0.778417	0.766846	38	tags=26%, list=5%, signal=26%	PRTN3/SRGN/PTGR1/MPO/ELANE/S100A9
GSE339_CD8POS_VS_CD4CD8DN_DC_IN_CULTURE_UP	GSE339_CD8POS_VS_CD4CD8DN_DC_IN_CULTURE_UP	23	-0.601125	-1.40468	0.0559896	0.778417	0.766846	59	tags=26%, list=8%, signal=25%	PSMB9/SPP1/TXN/PRKCSH/PSMB8/NUCB1
MARKEY_RB1_ACUTE_LOF_DN	MARKEY_RB1_ACUTE_LOF_DN	25	-0.587599	-1.39074	0.0561358	0.778417	0.766846	117	tags=24%, list=16%, signal=21%	MT1X/SRGN/CSF1R/PSMB9/OGN/PSMB8
GSE17721_ALL_VS_24H_PAM3CSK4_BMDC_DN	GSE17721_ALL_VS_24H_PAM3CSK4_BMDC_DN	15	-0.667267	-1.42775	0.0563584	0.778417	0.766846	193	tags=47%, list=26%, signal=35%	PGAM1/ARHGDIB/IGFBP4/ENPP2/GOT2/MMP9/DDT
BYSTROEM_CORRELATED_WITH_IL5_UP	BYSTROEM_CORRELATED_WITH_IL5_UP	6	-0.798657	-1.40613	0.0563847	0.778417	0.766846	24	tags=33%, list=3%, signal=33%	PRG2/NUCB1
GOBP_ESTABLISHMENT_OF_PROTEIN_LOCALIZATION_TO_MEMBRANE	GOBP_ESTABLISHMENT_OF_PROTEIN_LOCALIZATION_TO_MEMBRANE	20	0.55112	1.50565	0.0563949	0.778417	0.766846	107	tags=40%, list=15%, signal=35%	RPLP2/YWHAH/RAB11A/YWHAE/RPS6/RPS23/RPS12/RPL9
BIOCARTA_ACH_PATHWAY	BIOCARTA_ACH_PATHWAY	1	0.978231	1.29085	0.0565657	0.778417	0.766846	17	tags=100%, list=2%, signal=98%	YWHAH
BIOCARTA_BAD_PATHWAY	BIOCARTA_BAD_PATHWAY	1	0.978231	1.29085	0.0565657	0.778417	0.766846	17	tags=100%, list=2%, signal=98%	YWHAH
BIOCARTA_CDC25_PATHWAY	BIOCARTA_CDC25_PATHWAY	1	0.978231	1.29085	0.0565657	0.778417	0.766846	17	tags=100%, list=2%, signal=98%	YWHAH
BIOCARTA_G2_PATHWAY	BIOCARTA_G2_PATHWAY	1	0.978231	1.29085	0.0565657	0.778417	0.766846	17	tags=100%, list=2%, signal=98%	YWHAH
BIOCARTA_IGF1R_PATHWAY	BIOCARTA_IGF1R_PATHWAY	1	0.978231	1.29085	0.0565657	0.778417	0.766846	17	tags=100%, list=2%, signal=98%	YWHAH
BIOCARTA_MITR_PATHWAY	BIOCARTA_MITR_PATHWAY	1	0.978231	1.29085	0.0565657	0.778417	0.766846	17	tags=100%, list=2%, signal=98%	YWHAH
BIOCARTA_PLK3_PATHWAY	BIOCARTA_PLK3_PATHWAY	1	0.978231	1.29085	0.0565657	0.778417	0.766846	17	tags=100%, list=2%, signal=98%	YWHAH
BIOCARTA_RB_PATHWAY	BIOCARTA_RB_PATHWAY	1	0.978231	1.29085	0.0565657	0.778417	0.766846	17	tags=100%, list=2%, signal=98%	YWHAH
GHO_ATF5_TARGETS_DN	GHO_ATF5_TARGETS_DN	1	0.978231	1.29085	0.0565657	0.778417	0.766846	17	tags=100%, list=2%, signal=98%	YWHAH
GOBP_MEMBRANE_DEPOLARIZATION_DURING_ACTION_POTENTIAL	GOBP_MEMBRANE_DEPOLARIZATION_DURING_ACTION_POTENTIAL	1	0.978231	1.29085	0.0565657	0.778417	0.766846	17	tags=100%, list=2%, signal=98%	YWHAH
GOBP_NEGATIVE_REGULATION_OF_DENDRITE_MORPHOGENESIS	GOBP_NEGATIVE_REGULATION_OF_DENDRITE_MORPHOGENESIS	1	0.978231	1.29085	0.0565657	0.778417	0.766846	17	tags=100%, list=2%, signal=98%	YWHAH
GOMF_GLUCOCORTICOID_RECEPTOR_BINDING	GOMF_GLUCOCORTICOID_RECEPTOR_BINDING	1	0.978231	1.29085	0.0565657	0.778417	0.766846	17	tags=100%, list=2%, signal=98%	YWHAH
MATZUK_CUMULUS_EXPANSION	MATZUK_CUMULUS_EXPANSION	2	-0.935425	-1.29997	0.0568807	0.778417	0.766846	22	tags=100%, list=3%, signal=97%	PTX3
WP_ARYL_HYDROCARBON_RECEPTOR_PATHWAY	WP_ARYL_HYDROCARBON_RECEPTOR_PATHWAY	2	-0.93543	-1.29998	0.0568807	0.778417	0.766846	44	tags=100%, list=6%, signal=94%	IGFBP1
GSE12003_4D_VS_8D_CULTURE_MIR223_KO_BM_PROGENITOR_DN	GSE12003_4D_VS_8D_CULTURE_MIR223_KO_BM_PROGENITOR_DN	3	-0.895869	-1.33713	0.0569395	0.778417	0.766846	58	tags=100%, list=8%, signal=92%	CSRP1/B4GALT1
STAMBOLSKY_RESPONSE_TO_VITAMIN_D3_UP	STAMBOLSKY_RESPONSE_TO_VITAMIN_D3_UP	3	-0.895952	-1.33725	0.0569395	0.778417	0.766846	48	tags=67%, list=7%, signal=63%	CP/DHX9
GOMF_CYTOKINE_ACTIVITY	GOMF_CYTOKINE_ACTIVITY	7	-0.779751	-1.40444	0.0569514	0.778417	0.766846	104	tags=43%, list=14%, signal=37%	GPI/SPP1/TIMP1
RODWELL_AGING_KIDNEY_DN	RODWELL_AGING_KIDNEY_DN	7	-0.780494	-1.40578	0.0569514	0.778417	0.766846	152	tags=71%, list=21%, signal=57%	SLC4A1/PEBP1/GOT2/PTGR1/SELENBP1
PANGAS_TUMOR_SUPPRESSION_BY_SMAD1_AND_SMAD5_UP	PANGAS_TUMOR_SUPPRESSION_BY_SMAD1_AND_SMAD5_UP	11	-0.707522	-1.42272	0.0569715	0.778417	0.766846	85	tags=45%, list=12%, signal=41%	LCP1/NID1/FSTL1/LASP1/FBLN5
GSE339_CD8POS_VS_CD4CD8DN_DC_UP	GSE339_CD8POS_VS_CD4CD8DN_DC_UP	17	-0.660766	-1.44686	0.0570236	0.778417	0.766846	105	tags=47%, list=14%, signal=41%	P4HB/GSR/COL18A1/TYMP/LAP3/PSMA5/MRC1/NUCB1
HP_APLASIA_HYPOPLASIA_OF_FINGERS	HP_APLASIA_HYPOPLASIA_OF_FINGERS	8	0.7255	1.49603	0.057028	0.778417	0.766846	167	tags=62%, list=23%, signal=49%	RAC1/AIFM1/IGF2/MGP/RPS7
HP_ABNORMAL_CONJUNCTIVA_MORPHOLOGY	HP_ABNORMAL_CONJUNCTIVA_MORPHOLOGY	16	-0.658	-1.43603	0.0571031	0.778417	0.766846	133	tags=31%, list=18%, signal=26%	KRT1/TKT/PSMB4/PSMB9/PSMB8
PID_INTEGRIN1_PATHWAY	PID_INTEGRIN1_PATHWAY	16	-0.658266	-1.43662	0.0571031	0.778417	0.766846	108	tags=38%, list=15%, signal=33%	NID1/COL18A1/COL6A3/TNC/SPP1/COL6A1
GOBP_SYNAPTIC_MEMBRANE_ADHESION	GOBP_SYNAPTIC_MEMBRANE_ADHESION	1	-0.976871	-1.29271	0.0571992	0.778417	0.766846	19	tags=100%, list=3%, signal=98%
GOBP_CELLULAR_HOMEOSTASIS	GOBP_CELLULAR_HOMEOSTASIS	47	-0.520006	-1.35056	0.0573171	0.778417	0.766846	119	tags=30%, list=16%, signal=27%	FTH1/MT1X/LCN2/CORO1A/SNCA/LTF/TXN/FTL/LGALS1/ICAM1/MPO/S100A8/ELANE/S100A9
GOBP_RESPONSE_TO_CATECHOLAMINE	GOBP_RESPONSE_TO_CATECHOLAMINE	4	-0.846686	-1.36238	0.0574324	0.778417	0.766846	77	tags=75%, list=10%, signal=68%	ADIPOQ/PKLR/SNCA
GSE14308_TH2_VS_INDUCED_TREG_UP	GSE14308_TH2_VS_INDUCED_TREG_UP	4	-0.844452	-1.35879	0.0574324	0.778417	0.766846	36	tags=50%, list=5%, signal=48%	B2M/FTL
GSE5589_WT_VS_IL6_KO_LPS_STIM_MACROPHAGE_180MIN_DN	GSE5589_WT_VS_IL6_KO_LPS_STIM_MACROPHAGE_180MIN_DN	4	-0.846286	-1.36174	0.0574324	0.778417	0.766846	116	tags=75%, list=16%, signal=64%	SAA2/WFDC2/PKLR
GSE2770_UNTREATED_VS_TGFB_AND_IL4_TREATED_ACT_CD4_TCELL_2H_UP	GSE2770_UNTREATED_VS_TGFB_AND_IL4_TREATED_ACT_CD4_TCELL_2H_UP	8	-0.759581	-1.43014	0.0576	0.778417	0.766846	89	tags=50%, list=12%, signal=44%	CSF1R/MMP9/CHI3L1/NUCB1
GOBP_MULTI_MULTICELLULAR_ORGANISM_PROCESS	GOBP_MULTI_MULTICELLULAR_ORGANISM_PROCESS	20	-0.62146	-1.41383	0.0576408	0.778417	0.766846	194	tags=60%, list=26%, signal=45%	PSG5/ARHGDIB/PSG4/PSG9/PSG3/PAPPA/GOT2/IGFBP2/SPP1/MMP9/TIMP1/B4GALT1
MCMURRAY_TP53_HRAS_COOPERATION_RESPONSE_DN	MCMURRAY_TP53_HRAS_COOPERATION_RESPONSE_DN	5	-0.842186	-1.42462	0.0577771	0.778417	0.766846	72	tags=80%, list=10%, signal=73%	PLXDC2/LDHB/IGFBP2/MCAM
MCBRYAN_PUBERTAL_BREAST_3_4WK_UP	MCBRYAN_PUBERTAL_BREAST_3_4WK_UP	21	-0.61989	-1.42123	0.0577957	0.778417	0.766846	153	tags=52%, list=21%, signal=43%	HSPA1B/CDH1/WFDC2/LCN2/IGFBP2/TNC/SDC1/LTF/SPP1/IGHA2/CHI3L1
GSE36826_NORMAL_VS_STAPH_AUREUS_INF_SKIN_UP	GSE36826_NORMAL_VS_STAPH_AUREUS_INF_SKIN_UP	22	-0.610293	-1.41363	0.057971	0.778417	0.766846	136	tags=41%, list=18%, signal=34%	HNRNPA3/HNRNPM/TYMP/CORO1A/PSMA1/PSMA3/LTA4H/PSMA5/S100A9
AIYAR_COBRA1_TARGETS_UP	AIYAR_COBRA1_TARGETS_UP	6	-0.797502	-1.40409	0.0580431	0.778417	0.766846	21	tags=50%, list=3%, signal=49%	SERPINA3/TIMP1/S100A8
HP_ABNORMAL_METATARSAL_MORPHOLOGY	HP_ABNORMAL_METATARSAL_MORPHOLOGY	6	-0.797788	-1.4046	0.0580431	0.778417	0.766846	79	tags=50%, list=11%, signal=45%	HSPG2/HINT1/DAG1
GNATENKO_PLATELET_SIGNATURE	GNATENKO_PLATELET_SIGNATURE	21	0.557498	1.56351	0.0582772	0.778417	0.766846	21	tags=14%, list=3%, signal=14%	HLA-C/YWHAH/SPARC
GOCC_RECYCLING_ENDOSOME_MEMBRANE	GOCC_RECYCLING_ENDOSOME_MEMBRANE	7	0.785743	1.57444	0.0582824	0.778417	0.766846	47	tags=43%, list=6%, signal=41%	HLA-C/RAB11A/RAC1
GSE13547_2H_VS_12_H_ANTI_IGM_STIM_ZFX_KO_BCELL_DN	GSE13547_2H_VS_12_H_ANTI_IGM_STIM_ZFX_KO_BCELL_DN	12	-0.692344	-1.43097	0.0583942	0.778417	0.766846	134	tags=50%, list=18%, signal=42%	PRTN3/CLIC1/ACAA2/IL1RL1/LGALS1/MPO
GSE37301_LYMPHOID_PRIMED_MPP_VS_COMMON_LYMPHOID_PROGENITOR_DN	GSE37301_LYMPHOID_PRIMED_MPP_VS_COMMON_LYMPHOID_PROGENITOR_DN	12	-0.69503	-1.43652	0.0583942	0.778417	0.766846	189	tags=42%, list=26%, signal=31%	SOD2/NPM1/SRGN/IGFBP1/APOA5
HP_CORNEAL_OPACITY	HP_CORNEAL_OPACITY	12	-0.69241	-1.43111	0.0583942	0.778417	0.766846	177	tags=42%, list=24%, signal=32%	PCSK9/COL18A1/COLEC10/DAG1/PSMB8
GSE17301_CTRL_VS_48H_ACD3_ACD28_STIM_CD8_TCELL_DN	GSE17301_CTRL_VS_48H_ACD3_ACD28_STIM_CD8_TCELL_DN	11	-0.705552	-1.41876	0.0584708	0.778417	0.766846	193	tags=73%, list=26%, signal=54%	ARHGDIB/SOD2/COL18A1/VASP/HSPA1B/SDC1/PSMA3/ICAM1
GSE17721_POLYIC_VS_CPG_24H_BMDC_DN	GSE17721_POLYIC_VS_CPG_24H_BMDC_DN	11	-0.705288	-1.41823	0.0584708	0.778417	0.766846	11	tags=73%, list=1%, signal=73%	PGAM1/HNRNPK/UCHL1/GSR/VASP/ENPP2/B4GALT1/NUCB1
HP_FAT_MALABSORPTION	HP_FAT_MALABSORPTION	1	0.97551	1.28726	0.0585859	0.778417	0.766846	19	tags=100%, list=3%, signal=98%	PRSS2
HP_PANCREATIC_PSEUDOCYST	HP_PANCREATIC_PSEUDOCYST	1	0.97551	1.28726	0.0585859	0.778417	0.766846	19	tags=100%, list=3%, signal=98%	PRSS2
HP_STEATORRHEA	HP_STEATORRHEA	1	0.97551	1.28726	0.0585859	0.778417	0.766846	19	tags=100%, list=3%, signal=98%	PRSS2
GSE19825_NAIVE_VS_IL2RAHIGH_DAY3_EFF_CD8_TCELL_UP	GSE19825_NAIVE_VS_IL2RAHIGH_DAY3_EFF_CD8_TCELL_UP	10	-0.730633	-1.44743	0.0586466	0.778417	0.766846	19	tags=70%, list=3%, signal=69%	AZGP1/FCGR3A/SERPINA3/LBP/ADAM12/SPARCL1/COL6A1
GOBP_KERATAN_SULFATE_CATABOLIC_PROCESS	GOBP_KERATAN_SULFATE_CATABOLIC_PROCESS	2	-0.932464	-1.29586	0.0587156	0.778417	0.766846	50	tags=100%, list=7%, signal=93%	OGN
GOBP_REGULATION_OF_GENE_SILENCING	GOBP_REGULATION_OF_GENE_SILENCING	2	-0.933243	-1.29694	0.0587156	0.778417	0.766846	52	tags=100%, list=7%, signal=93%	DHX9
GOBP_REGULATION_OF_GENE_SILENCING_BY_RNA	GOBP_REGULATION_OF_GENE_SILENCING_BY_RNA	2	-0.933243	-1.29694	0.0587156	0.778417	0.766846	52	tags=100%, list=7%, signal=93%	DHX9
GOMF_PHOSPHOLIPASE_A2_ACTIVITY	GOMF_PHOSPHOLIPASE_A2_ACTIVITY	2	-0.93193	-1.29512	0.0587156	0.778417	0.766846	29	tags=100%, list=4%, signal=96%	PLA2G2A
GOMF_PHOSPHOLIPASE_A2_ACTIVITY_CONSUMING_1_2_DIPALMITOYLPHOSPHATIDYLCHOLINE	GOMF_PHOSPHOLIPASE_A2_ACTIVITY_CONSUMING_1_2_DIPALMITOYLPHOSPHATIDYLCHOLINE	2	-0.93193	-1.29512	0.0587156	0.778417	0.766846	29	tags=100%, list=4%, signal=96%	PLA2G2A
HP_ABNORMALITY_OF_THE_THORACIC_CAVITY	HP_ABNORMALITY_OF_THE_THORACIC_CAVITY	2	-0.933675	-1.29754	0.0587156	0.778417	0.766846	49	tags=100%, list=7%, signal=94%	FBLN5
HP_ACUTE_LYMPHOBLASTIC_LEUKEMIA	HP_ACUTE_LYMPHOBLASTIC_LEUKEMIA	2	-0.933243	-1.29694	0.0587156	0.778417	0.766846	52	tags=100%, list=7%, signal=93%	ELANE
REACTOME_DEFECTIVE_CHST6_CAUSES_MCDC1	REACTOME_DEFECTIVE_CHST6_CAUSES_MCDC1	2	-0.932464	-1.29586	0.0587156	0.778417	0.766846	50	tags=100%, list=7%, signal=93%	OGN
REACTOME_DEFECTIVE_ST3GAL3_CAUSES_MCT12_AND_EIEE15	REACTOME_DEFECTIVE_ST3GAL3_CAUSES_MCT12_AND_EIEE15	2	-0.932464	-1.29586	0.0587156	0.778417	0.766846	50	tags=100%, list=7%, signal=93%	OGN
REACTOME_KERATAN_SULFATE_DEGRADATION	REACTOME_KERATAN_SULFATE_DEGRADATION	2	-0.932464	-1.29586	0.0587156	0.778417	0.766846	50	tags=100%, list=7%, signal=93%	OGN
GOBP_CELLULAR_RESPONSE_TO_EPINEPHRINE_STIMULUS	GOBP_CELLULAR_RESPONSE_TO_EPINEPHRINE_STIMULUS	3	-0.894825	-1.33557	0.0587189	0.778417	0.766846	77	tags=100%, list=10%, signal=90%	PKLR/SNCA
GOBP_RESPONSE_TO_EPINEPHRINE	GOBP_RESPONSE_TO_EPINEPHRINE	3	-0.894825	-1.33557	0.0587189	0.778417	0.766846	77	tags=100%, list=10%, signal=90%	PKLR/SNCA
MORI_PLASMA_CELL_UP	MORI_PLASMA_CELL_UP	3	-0.894828	-1.33558	0.0587189	0.778417	0.766846	69	tags=100%, list=9%, signal=91%	BPGM/IGHA2
GOBP_DIVALENT_INORGANIC_CATION_HOMEOSTASIS	GOBP_DIVALENT_INORGANIC_CATION_HOMEOSTASIS	19	-0.622784	-1.39311	0.0588235	0.778417	0.766846	117	tags=42%, list=16%, signal=36%	SAA1/MT1X/CORO1A/SNCA/REG1A/S100A8/ELANE/S100A9
HP_INFLAMMATORY_ABNORMALITY_OF_THE_EYE	HP_INFLAMMATORY_ABNORMALITY_OF_THE_EYE	20	-0.619711	-1.40985	0.0589812	0.778417	0.766846	144	tags=30%, list=20%, signal=25%	NPM1/PRTN3/TKT/PSMB4/PSMB9/PSMB8
HP_HYPERHOMOCYSTINEMIA	HP_HYPERHOMOCYSTINEMIA	2	0.949949	1.35354	0.059081	0.778417	0.766846	2	tags=50%, list=0%, signal=50%	PRDX1
HUANG_GATA2_TARGETS_UP	HUANG_GATA2_TARGETS_UP	17	-0.656119	-1.43669	0.0598053	0.778417	0.766846	134	tags=41%, list=18%, signal=34%	PRTN3/SRGN/PSMB9/CD93/LGALS1/MPO/PSMB8
PID_AP1_PATHWAY	PID_AP1_PATHWAY	5	-0.840018	-1.42096	0.0598222	0.778417	0.766846	25	tags=80%, list=3%, signal=78%	AGT/FABP4/MMP9/TIMP1
GSE1460_INTRATHYMIC_T_PROGENITOR_VS_NAIVE_CD4_TCELL_ADULT_BLOOD_DN	GSE1460_INTRATHYMIC_T_PROGENITOR_VS_NAIVE_CD4_TCELL_ADULT_BLOOD_DN	9	-0.761568	-1.4695	0.05987	0.778417	0.766846	36	tags=44%, list=5%, signal=43%	BIN2/FTL/TIMP1/COL6A1
GSE29615_CTRL_VS_DAY7_LAIV_FLU_VACCINE_PBMC_UP	GSE29615_CTRL_VS_DAY7_LAIV_FLU_VACCINE_PBMC_UP	11	-0.705082	-1.41782	0.05997	0.778417	0.766846	25	tags=36%, list=3%, signal=36%	REG3A/MMP9/ELANE/CHI3L1
GOBP_RESPONSE_TO_MOLECULE_OF_BACTERIAL_ORIGIN	GOBP_RESPONSE_TO_MOLECULE_OF_BACTERIAL_ORIGIN	25	-0.586759	-1.38876	0.0600522	0.778417	0.766846	76	tags=40%, list=10%, signal=37%	CPS1/DEFA3/SNCA/LTF/ICAM1/MPO/S100A8/ELANE/MRC1/S100A9
GSE22501_PERIPHERAL_BLOOD_VS_CORD_BLOOD_TREG_UP	GSE22501_PERIPHERAL_BLOOD_VS_CORD_BLOOD_TREG_UP	13	-0.685009	-1.44583	0.0601719	0.778417	0.766846	78	tags=38%, list=11%, signal=35%	ANK1/GP9/MB/LASP1/BHMT
PICCALUGA_ANGIOIMMUNOBLASTIC_LYMPHOMA_UP	PICCALUGA_ANGIOIMMUNOBLASTIC_LYMPHOMA_UP	42	-0.531622	-1.35074	0.0603015	0.778417	0.766846	85	tags=17%, list=12%, signal=16%	FSTL1/TNC/CD93/MMP9/SPARCL1/CHI3L1/COL6A1
WP_PPAR_ALPHA_PATHWAY	WP_PPAR_ALPHA_PATHWAY	7	-0.774619	-1.3952	0.0603015	0.778417	0.766846	99	tags=29%, list=13%, signal=25%	FABP1/APOA5
GOBP_REPRODUCTION	GOBP_REPRODUCTION	54	-0.50566	-1.33985	0.0603136	0.778417	0.766846	150	tags=35%, list=20%, signal=30%	HSP90AB1/PSG9/PSG3/PAPPA/SORD/WFDC2/GOT2/ACTR2/IGFBP2/ACTR3/TNC/SDC1/SPP1/ICAM1/MMP9/PTX3/TIMP1/KRT9/B4GALT1
GSE360_L_MAJOR_VS_B_MALAYI_LOW_DOSE_DC_UP	GSE360_L_MAJOR_VS_B_MALAYI_LOW_DOSE_DC_UP	20	-0.61661	-1.4028	0.0603217	0.778417	0.766846	136	tags=50%, list=18%, signal=42%	HNRNPA3/GBE1/MT1X/PSMA4/REG1A/TXN/UGP2/ICAM1/MMP9/CA3
HP_ABNORMALITY_OF_FACIAL_SOFT_TISSUE	HP_ABNORMALITY_OF_FACIAL_SOFT_TISSUE	20	-0.616818	-1.40327	0.0603217	0.778417	0.766846	134	tags=40%, list=18%, signal=34%	PRTN3/COL6A3/PSMB4/SNCA/PSMB9/FTL/PSMB8/COL6A1
GSE6674_CPG_VS_CPG_AND_ANTI_IGM_STIM_BCELL_DN	GSE6674_CPG_VS_CPG_AND_ANTI_IGM_STIM_BCELL_DN	3	0.903138	1.41181	0.060343	0.778417	0.766846	74	tags=100%, list=10%, signal=90%	CNDP2/SLC2A3/PFKP
GSE26351_WNT_VS_BMP_PATHWAY_STIM_HEMATOPOIETIC_PROGENITORS_DN	GSE26351_WNT_VS_BMP_PATHWAY_STIM_HEMATOPOIETIC_PROGENITORS_DN	3	-0.893588	-1.33373	0.0604982	0.778417	0.766846	82	tags=100%, list=11%, signal=89%	LTF/MMP9
HP_CELLULITIS	HP_CELLULITIS	3	-0.893728	-1.33394	0.0604982	0.778417	0.766846	15	tags=67%, list=2%, signal=66%	IGLL1/ELANE
RICKMAN_HEAD_AND_NECK_CANCER_B	RICKMAN_HEAD_AND_NECK_CANCER_B	3	-0.894506	-1.3351	0.0604982	0.778417	0.766846	50	tags=67%, list=7%, signal=62%	COMP/OGN
GOBP_CAMERA_TYPE_EYE_MORPHOGENESIS	GOBP_CAMERA_TYPE_EYE_MORPHOGENESIS	2	-0.930131	-1.29262	0.0605505	0.778417	0.766846	17	tags=100%, list=2%, signal=98%	TSKU
GOBP_INTERFERON_BETA_PRODUCTION	GOBP_INTERFERON_BETA_PRODUCTION	2	-0.929666	-1.29197	0.0605505	0.778417	0.766846	48	tags=100%, list=7%, signal=94%	DHX9
GOBP_POSITIVE_REGULATION_OF_INTERFERON_BETA_PRODUCTION	GOBP_POSITIVE_REGULATION_OF_INTERFERON_BETA_PRODUCTION	2	-0.929666	-1.29197	0.0605505	0.778417	0.766846	48	tags=100%, list=7%, signal=94%	DHX9
GOBP_REGULATION_OF_DEFENSE_RESPONSE_TO_VIRUS_BY_HOST	GOBP_REGULATION_OF_DEFENSE_RESPONSE_TO_VIRUS_BY_HOST	2	-0.929666	-1.29197	0.0605505	0.778417	0.766846	48	tags=100%, list=7%, signal=94%	DHX9
GOBP_REGULATION_OF_PROTEIN_TARGETING	GOBP_REGULATION_OF_PROTEIN_TARGETING	2	-0.929834	-1.29221	0.0605505	0.778417	0.766846	2	tags=100%, list=0%, signal=100%	NUCB1
GSE36078_UNTREATED_VS_AD5_INF_IL1R_KO_MOUSE_LUNG_DC_UP	GSE36078_UNTREATED_VS_AD5_INF_IL1R_KO_MOUSE_LUNG_DC_UP	2	-0.93002	-1.29246	0.0605505	0.778417	0.766846	36	tags=100%, list=5%, signal=95%	FTL
WP_MAMMARY_GLAND_DEVELOPMENT_PATHWAY_PUBERTY_STAGE_2_OF_4	WP_MAMMARY_GLAND_DEVELOPMENT_PATHWAY_PUBERTY_STAGE_2_OF_4	2	-0.931629	-1.2947	0.0605505	0.778417	0.766846	21	tags=100%, list=3%, signal=97%	TIMP1
BOYAULT_LIVER_CANCER_SUBCLASS_G3_DN	BOYAULT_LIVER_CANCER_SUBCLASS_G3_DN	15	-0.662231	-1.41697	0.0606936	0.778417	0.766846	24	tags=20%, list=3%, signal=20%	COL18A1/PRG2/SELENBP1
GSE19401_UNSTIM_VS_RETINOIC_ACID_AND_PAM2CSK4_STIM_FOLLICULAR_DC_DN	GSE19401_UNSTIM_VS_RETINOIC_ACID_AND_PAM2CSK4_STIM_FOLLICULAR_DC_DN	15	-0.662567	-1.41769	0.0606936	0.778417	0.766846	49	tags=27%, list=7%, signal=25%	FBLN5/ICAM1/PTX3/TIMP1
GSE15930_NAIVE_VS_24H_IN_VITRO_STIM_CD8_TCELL_UP	GSE15930_NAIVE_VS_24H_IN_VITRO_STIM_CD8_TCELL_UP	8	-0.758696	-1.42847	0.0608	0.778417	0.766846	11	tags=38%, list=1%, signal=37%	KRT1/B4GALT1/COL6A1
GSE19401_PAM2CSK4_VS_RETINOIC_ACID_STIM_FOLLICULAR_DC_DN	GSE19401_PAM2CSK4_VS_RETINOIC_ACID_STIM_FOLLICULAR_DC_DN	8	-0.758626	-1.42834	0.0608	0.778417	0.766846	113	tags=50%, list=15%, signal=43%	REG3A/KRT31/MCAM/SPARCL1
GSE22601_DOUBLE_POSITIVE_VS_CD8_SINGLE_POSITIVE_THYMOCYTE_DN	GSE22601_DOUBLE_POSITIVE_VS_CD8_SINGLE_POSITIVE_THYMOCYTE_DN	8	-0.758753	-1.42858	0.0608	0.778417	0.766846	32	tags=50%, list=4%, signal=48%	NPM1/LGALS1/UGP2/ICAM1
GSE22033_UNTREATED_VS_ROSIGLITAZONE_TREATED_MEF_DN	GSE22033_UNTREATED_VS_ROSIGLITAZONE_TREATED_MEF_DN	5	-0.836147	-1.41441	0.0608448	0.778417	0.766846	64	tags=60%, list=9%, signal=55%	TFRC/CHGA/DDT
HUMMERICH_BENIGN_SKIN_TUMOR_UP	HUMMERICH_BENIGN_SKIN_TUMOR_UP	5	-0.836327	-1.41471	0.0608448	0.778417	0.766846	16	tags=60%, list=2%, signal=59%	KRT16/S100A8/S100A9
GOBP_ENSHEATHMENT_OF_NEURONS	GOBP_ENSHEATHMENT_OF_NEURONS	5	-0.816391	-1.38099	0.0609137	0.778417	0.766846	105	tags=40%, list=14%, signal=35%	TYMP/DAG1
HP_ABNORMALITY_OF_THE_VASCULATURE_OF_THE_EYE	HP_ABNORMALITY_OF_THE_VASCULATURE_OF_THE_EYE	18	-0.64329	-1.42023	0.0609418	0.778417	0.766846	96	tags=44%, list=13%, signal=40%	HLA-B/TFRC/MDH2/IGFBP7/TKT/PSMB4/PSMB9/PSMB8
NABA_CORE_MATRISOME	NABA_CORE_MATRISOME	47	-0.518571	-1.34683	0.0609756	0.778417	0.766846	110	tags=43%, list=15%, signal=39%	IGFBP6/OIT3/NID1/FGL1/COL18A1/VCAN/IGFBP4/MMRN1/SRGN/COL6A3/IGFBP2/TNC/SPP1/OGN/FBLN5/IGFBP1/PRG2/SPARCL1/TSKU/COL6A1
WP_INTERFERON_TYPE_I_SIGNALING_PATHWAYS	WP_INTERFERON_TYPE_I_SIGNALING_PATHWAYS	3	0.902834	1.41133	0.0610248	0.778417	0.766846	58	tags=67%, list=8%, signal=62%	RAC1/RPS6
GOBP_POSITIVE_REGULATION_OF_CHEMOTAXIS	GOBP_POSITIVE_REGULATION_OF_CHEMOTAXIS	12	0.658288	1.50126	0.0611821	0.778417	0.766846	53	tags=42%, list=7%, signal=39%	CDH13/SERPINE1/RAC1/F7/THBS4
GOBP_ACTION_POTENTIAL	GOBP_ACTION_POTENTIAL	3	0.89588	1.40046	0.0612245	0.778417	0.766846	46	tags=67%, list=6%, signal=63%	YWHAH/YWHAE
GSE19374_UNINF_VS_LISTERIA_INFECTED_MACROPHAGE_DN	GSE19374_UNINF_VS_LISTERIA_INFECTED_MACROPHAGE_DN	3	0.895998	1.40065	0.0612245	0.778417	0.766846	55	tags=67%, list=7%, signal=62%	PTBP1/LNPEP
GSE36888_STAT5_AB_KNOCKIN_VS_WT_TCELL_IL2_TREATED_6H_DN	GSE36888_STAT5_AB_KNOCKIN_VS_WT_TCELL_IL2_TREATED_6H_DN	3	0.899404	1.40597	0.0612245	0.778417	0.766846	13	tags=67%, list=2%, signal=66%	DCXR/PSAT1
HP_ABNORMAL_GLOMERULAR_MESANGIUM_MORPHOLOGY	HP_ABNORMAL_GLOMERULAR_MESANGIUM_MORPHOLOGY	3	0.899109	1.40551	0.0612245	0.778417	0.766846	27	tags=33%, list=4%, signal=32%	ARHGDIA
HP_CONFUSION	HP_CONFUSION	3	0.89865	1.40479	0.0612245	0.778417	0.766846	2	tags=33%, list=0%, signal=33%	PRDX1
KYNG_ENVIRONMENTAL_STRESS_RESPONSE_NOT_BY_GAMMA_IN_WS	KYNG_ENVIRONMENTAL_STRESS_RESPONSE_NOT_BY_GAMMA_IN_WS	3	0.895723	1.40022	0.0612245	0.778417	0.766846	3	tags=33%, list=0%, signal=33%	ARPC1B
GOBP_BARBED_END_ACTIN_FILAMENT_CAPPING	GOBP_BARBED_END_ACTIN_FILAMENT_CAPPING	2	0.942837	1.3434	0.0612691	0.778417	0.766846	6	tags=50%, list=1%, signal=50%	CAPZA1
GSE14000_UNSTIM_VS_4H_LPS_DC_UP	GSE14000_UNSTIM_VS_4H_LPS_DC_UP	2	0.942779	1.34332	0.0612691	0.778417	0.766846	44	tags=100%, list=6%, signal=94%	CCT6A/EEF2
GSE4590_PRE_BCELL_VS_LARGE_PRE_BCELL_DN	GSE4590_PRE_BCELL_VS_LARGE_PRE_BCELL_DN	2	0.944606	1.34592	0.0612691	0.778417	0.766846	8	tags=50%, list=1%, signal=50%	NT5DC3
HP_ABNORMAL_GLOMERULAR_BASEMENT_MEMBRANE_MORPHOLOGY	HP_ABNORMAL_GLOMERULAR_BASEMENT_MEMBRANE_MORPHOLOGY	2	0.946522	1.34865	0.0612691	0.778417	0.766846	27	tags=50%, list=4%, signal=48%	ARHGDIA
HP_GLOMERULAR_DEPOSITS	HP_GLOMERULAR_DEPOSITS	2	0.946522	1.34865	0.0612691	0.778417	0.766846	27	tags=50%, list=4%, signal=48%	ARHGDIA
HP_PANCREATIC_CALCIFICATION	HP_PANCREATIC_CALCIFICATION	2	0.944142	1.34526	0.0612691	0.778417	0.766846	43	tags=100%, list=6%, signal=94%	PRSS2/CPA1
HP_RECURRENT_PANCREATITIS	HP_RECURRENT_PANCREATITIS	2	0.944142	1.34526	0.0612691	0.778417	0.766846	43	tags=100%, list=6%, signal=94%	PRSS2/CPA1
GSE6674_ANTI_IGM_VS_PL2_3_STIM_BCELL_UP	GSE6674_ANTI_IGM_VS_PL2_3_STIM_BCELL_UP	6	-0.794089	-1.39808	0.0613599	0.778417	0.766846	58	tags=50%, list=8%, signal=46%	RNASE4/CSRP1/DDT
GSE8621_LPS_PRIMED_UNSTIM_VS_LPS_PRIMED_AND_LPS_STIM_MACROPHAGE_DN	GSE8621_LPS_PRIMED_UNSTIM_VS_LPS_PRIMED_AND_LPS_STIM_MACROPHAGE_DN	6	-0.794892	-1.3995	0.0613599	0.778417	0.766846	151	tags=83%, list=21%, signal=67%	CDH1/SRGN/MYO5A/LTA4H/ELANE
REACTOME_MEMBRANE_TRAFFICKING	REACTOME_MEMBRANE_TRAFFICKING	42	0.412667	1.32355	0.0613681	0.778417	0.766846	65	tags=24%, list=9%, signal=23%	CD59/CAPZA1/YWHAH/RAB11A/TUBB8/TUBA8/YWHAE/RAC1/LNPEP/SPTA1
MIYAGAWA_TARGETS_OF_EWSR1_ETS_FUSIONS_UP	MIYAGAWA_TARGETS_OF_EWSR1_ETS_FUSIONS_UP	10	-0.727503	-1.44122	0.0616541	0.778417	0.766846	125	tags=80%, list=17%, signal=67%	NID1/ARHGDIB/CES1/SORD/OAF/IGFBP2/FBLN5/ICAM1
GOBP_MIDBRAIN_DEVELOPMENT	GOBP_MIDBRAIN_DEVELOPMENT	7	0.751695	1.50621	0.0617284	0.778417	0.766846	46	tags=43%, list=6%, signal=41%	YWHAH/CKB/YWHAE
GOBP_NEURAL_NUCLEUS_DEVELOPMENT	GOBP_NEURAL_NUCLEUS_DEVELOPMENT	7	0.751695	1.50621	0.0617284	0.778417	0.766846	46	tags=43%, list=6%, signal=41%	YWHAH/CKB/YWHAE
GOBP_SUBSTANTIA_NIGRA_DEVELOPMENT	GOBP_SUBSTANTIA_NIGRA_DEVELOPMENT	7	0.751695	1.50621	0.0617284	0.778417	0.766846	46	tags=43%, list=6%, signal=41%	YWHAH/CKB/YWHAE
GSE39110_UNTREATED_VS_IL2_TREATED_CD8_TCELL_DAY3_POST_IMMUNIZATION_UP	GSE39110_UNTREATED_VS_IL2_TREATED_CD8_TCELL_DAY3_POST_IMMUNIZATION_UP	5	-0.835758	-1.41375	0.0618674	0.778417	0.766846	11	tags=40%, list=1%, signal=40%	PROS1/B4GALT1
KLEIN_PRIMARY_EFFUSION_LYMPHOMA_UP	KLEIN_PRIMARY_EFFUSION_LYMPHOMA_UP	7	-0.774462	-1.39491	0.0619765	0.778417	0.766846	104	tags=43%, list=14%, signal=37%	GPI/GANAB/LTA4H
SARRIO_EPITHELIAL_MESENCHYMAL_TRANSITION_UP	SARRIO_EPITHELIAL_MESENCHYMAL_TRANSITION_UP	9	0.715322	1.53287	0.0620543	0.778417	0.766846	45	tags=33%, list=6%, signal=32%	ARPC1B/YWHAH/TUBA8
GOBP_REGULATION_OF_MEMBRANE_PROTEIN_ECTODOMAIN_PROTEOLYSIS	GOBP_REGULATION_OF_MEMBRANE_PROTEIN_ECTODOMAIN_PROTEOLYSIS	3	-0.891461	-1.33055	0.0622776	0.778417	0.766846	21	tags=67%, list=3%, signal=65%	APOE/TIMP1
NAISHIRO_CTNNB1_TARGETS_WITH_LEF1_MOTIF	NAISHIRO_CTNNB1_TARGETS_WITH_LEF1_MOTIF	3	-0.891447	-1.33053	0.0622776	0.778417	0.766846	72	tags=67%, list=10%, signal=60%	IGFBP2/TNC
WILSON_PROTEASES_AT_TUMOR_BONE_INTERFACE_UP	WILSON_PROTEASES_AT_TUMOR_BONE_INTERFACE_UP	3	-0.891058	-1.32995	0.0622776	0.778417	0.766846	25	tags=67%, list=3%, signal=65%	SERPING1/MMP9
AGARWAL_AKT_PATHWAY_TARGETS	AGARWAL_AKT_PATHWAY_TARGETS	2	-0.929155	-1.29126	0.0623853	0.778417	0.766846	55	tags=100%, list=7%, signal=93%	MMP9
BOYLAN_MULTIPLE_MYELOMA_C_CLUSTER_DN	BOYLAN_MULTIPLE_MYELOMA_C_CLUSTER_DN	2	-0.929155	-1.29126	0.0623853	0.778417	0.766846	55	tags=100%, list=7%, signal=93%	SERPINB1
COWLING_MYCN_TARGETS	COWLING_MYCN_TARGETS	2	-0.929155	-1.29126	0.0623853	0.778417	0.766846	55	tags=100%, list=7%, signal=93%	FBLN5
GOBP_PALLIUM_DEVELOPMENT	GOBP_PALLIUM_DEVELOPMENT	2	-0.928908	-1.29092	0.0623853	0.778417	0.766846	17	tags=100%, list=2%, signal=98%	TSKU
HP_ANTINEUTROPHIL_ANTIBODY_POSITIVITY	HP_ANTINEUTROPHIL_ANTIBODY_POSITIVITY	2	-0.929155	-1.29126	0.0623853	0.778417	0.766846	55	tags=100%, list=7%, signal=93%	ELANE
ROSS_ACUTE_MYELOID_LEUKEMIA_CBF	ROSS_ACUTE_MYELOID_LEUKEMIA_CBF	3	0.902097	1.41018	0.0623885	0.778417	0.766846	59	tags=67%, list=8%, signal=62%	SPARC/PGM1
GSE17721_POLYIC_VS_PAM3CSK4_4H_BMDC_UP	GSE17721_POLYIC_VS_PAM3CSK4_4H_BMDC_UP	8	-0.757304	-1.42585	0.0624	0.778417	0.766846	158	tags=75%, list=21%, signal=60%	CBR3/ENPP2/PRTN3/ASL/PSMA4/PSMB8
GSE3982_EOSINOPHIL_VS_BCELL_UP	GSE3982_EOSINOPHIL_VS_BCELL_UP	8	-0.756406	-1.42416	0.0624	0.778417	0.766846	146	tags=50%, list=20%, signal=41%	PSG3/FTH1/REG1A/MPO
GOBP_BIOLOGICAL_PROCESS_INVOLVED_IN_INTERACTION_WITH_HOST	GOBP_BIOLOGICAL_PROCESS_INVOLVED_IN_INTERACTION_WITH_HOST	23	-0.597276	-1.39569	0.0625	0.778417	0.766846	185	tags=48%, list=25%, signal=37%	TCP1/P4HB/NRP1/HSPA1B/CDH1/NCAM1/DAG1/LGALS1/ICAM1/PTX3/MRC1
SCHAEFFER_PROSTATE_DEVELOPMENT_48HR_DN	SCHAEFFER_PROSTATE_DEVELOPMENT_48HR_DN	16	-0.654454	-1.4283	0.0626741	0.778417	0.766846	208	tags=44%, list=28%, signal=32%	LBP/KRT75/IGFBP4/PAPPA/WFDC2/COLEC10/SPARCL1
GSE46242_CTRL_VS_EGR2_DELETED_ANERGIC_TH1_CD4_TCELL_UP	GSE46242_CTRL_VS_EGR2_DELETED_ANERGIC_TH1_CD4_TCELL_UP	12	-0.68842	-1.42286	0.0627737	0.778417	0.766846	52	tags=33%, list=7%, signal=31%	NUP214/DAG1/S100A9/NUCB1
GSE37301_HEMATOPOIETIC_STEM_CELL_VS_GRAN_MONO_PROGENITOR_DN	GSE37301_HEMATOPOIETIC_STEM_CELL_VS_GRAN_MONO_PROGENITOR_DN	11	-0.703091	-1.41381	0.0629685	0.778417	0.766846	25	tags=36%, list=3%, signal=36%	ACTG1/YWHAB/MMP9/NUCB1
GSE3982_CTRL_VS_LPS_1H_NEUTROPHIL_UP	GSE3982_CTRL_VS_LPS_1H_NEUTROPHIL_UP	6	-0.793174	-1.39647	0.0630182	0.778417	0.766846	69	tags=50%, list=9%, signal=46%	BPGM/PSMA5/COL6A1
GSE1740_UNSTIM_VS_IFNA_STIMULATED_MCSF_DERIVED_MACROPHAGE_DN	GSE1740_UNSTIM_VS_IFNA_STIMULATED_MCSF_DERIVED_MACROPHAGE_DN	13	-0.681928	-1.43933	0.0630372	0.778417	0.766846	120	tags=46%, list=16%, signal=39%	PSMA2/HINT1/PSMB9/PSMA3/PSMA5/PSMB8
GSE19198_CTRL_VS_IL21_TREATED_TCELL_24H_DN	GSE19198_CTRL_VS_IL21_TREATED_TCELL_24H_DN	13	-0.682364	-1.44025	0.0630372	0.778417	0.766846	104	tags=54%, list=14%, signal=47%	GPI/CORO1A/ACAA2/FBLN5/PTGR1/DAG1/LTA4H
GSE9509_LPS_VS_LPS_AND_IL10_STIM_IL10_KO_MACROPHAGE_20MIN_UP	GSE9509_LPS_VS_LPS_AND_IL10_STIM_IL10_KO_MACROPHAGE_20MIN_UP	12	0.655897	1.49581	0.0630792	0.778417	0.766846	159	tags=33%, list=22%, signal=27%	EEF2/RAB27B/ALDH1A1/ITGA2B
GOBP_ANTIGEN_RECEPTOR_MEDIATED_SIGNALING_PATHWAY	GOBP_ANTIGEN_RECEPTOR_MEDIATED_SIGNALING_PATHWAY	57	-0.500955	-1.33912	0.0630952	0.778417	0.766846	129	tags=21%, list=18%, signal=19%	PSMB3/PSMA2/PSMA4/PSMB4/PSMB9/PSMA1/IGHV3-16/PSMA3/IGHA2/PSMA5/PSMA7/PSMB8
GSE11864_CSF1_VS_CSF1_IFNG_IN_MAC_DN	GSE11864_CSF1_VS_CSF1_IFNG_IN_MAC_DN	10	-0.724951	-1.43617	0.0631579	0.778417	0.766846	172	tags=60%, list=23%, signal=47%	HYOU1/PSMB5/RPS2/PSMB4/MPO/PSMA5
GSE1460_DP_THYMOCYTE_VS_NAIVE_CD4_TCELL_CORD_BLOOD_DN	GSE1460_DP_THYMOCYTE_VS_NAIVE_CD4_TCELL_CORD_BLOOD_DN	10	-0.723363	-1.43302	0.0631579	0.778417	0.766846	21	tags=30%, list=3%, signal=30%	BIN2/TIMP1/B4GALT1
GSE19401_NAIVE_VS_IMMUNIZED_MOUSE_PLN_FOLLICULAR_DC_DN	GSE19401_NAIVE_VS_IMMUNIZED_MOUSE_PLN_FOLLICULAR_DC_DN	10	-0.724789	-1.43585	0.0631579	0.778417	0.766846	59	tags=30%, list=8%, signal=28%	PSMB9/SPP1/LTA4H
GSE19888_ADENOSINE_A3R_INH_PRETREAT_AND_ACT_BY_A3R_VS_TCELL_MEMBRANES_ACT_MAST_CELL_DN	GSE19888_ADENOSINE_A3R_INH_PRETREAT_AND_ACT_BY_A3R_VS_TCELL_MEMBRANES_ACT_MAST_CELL_DN	10	-0.722632	-1.43157	0.0631579	0.778417	0.766846	25	tags=50%, list=3%, signal=49%	COL18A1/PEBP1/MMP9/S100A8/S100A9
REACTOME_APOPTOSIS	REACTOME_APOPTOSIS	21	-0.61655	-1.41357	0.063172	0.778417	0.766846	169	tags=67%, list=23%, signal=53%	PSMB5/YWHAB/CDH1/PSMB3/PSMA2/YWHAG/PSMA4/PSMB4/PSMB9/PSMA1/PSMA3/PSMA5/PSMA7/PSMB8
GOBP_COLLAGEN_FIBRIL_ORGANIZATION	GOBP_COLLAGEN_FIBRIL_ORGANIZATION	4	0.860734	1.43622	0.0634146	0.778417	0.766846	41	tags=25%, list=6%, signal=24%	TNXB
GSE29614_CTRL_VS_DAY7_TIV_FLU_VACCINE_PBMC_UP	GSE29614_CTRL_VS_DAY7_TIV_FLU_VACCINE_PBMC_UP	4	0.86283	1.43972	0.0634146	0.778417	0.766846	31	tags=25%, list=4%, signal=24%	PEBP4
GOBP_EPITHELIAL_CELL_DIFFERENTIATION	GOBP_EPITHELIAL_CELL_DIFFERENTIATION	35	-0.554162	-1.38311	0.0634518	0.778417	0.766846	137	tags=40%, list=19%, signal=34%	KRT16/KRT1/CPS1/CES1/KRT85/REG3A/KRT86/FSTL1/KRT31/SDC1/ICAM1/MMP9/KRT9/B4GALT1
GOBP_RNA_CATABOLIC_PROCESS	GOBP_RNA_CATABOLIC_PROCESS	39	-0.535289	-1.35277	0.0634518	0.778417	0.766846	156	tags=54%, list=21%, signal=45%	PSMA6/HNRNPC/PSMB5/YWHAB/HSPA1B/NPM1/PSMB3/HNRNPM/PSMA2/PSMA4/RPS2/LSM1/PSMB4/PSMB9/PSMA1/NUP214/DHX9/PSMA3/PSMA5/PSMA7/PSMB8
GOMF_PHOSPHOLIPID_BINDING	GOMF_PHOSPHOLIPID_BINDING	29	-0.565949	-1.3719	0.0634715	0.778417	0.766846	130	tags=28%, list=18%, signal=24%	BIN2/CPS1/PEBP1/GOT2/FABP1/SNCA/APOA5/PLA2G2A
GSE28737_BCL6_HET_VS_BCL6_KO_FOLLICULAR_BCELL_DN	GSE28737_BCL6_HET_VS_BCL6_KO_FOLLICULAR_BCELL_DN	15	-0.65926	-1.41062	0.0635838	0.778417	0.766846	108	tags=40%, list=15%, signal=35%	COL6A3/FSTL1/TNC/SPP1/UGP2/S100A8
LEE_AGING_NEOCORTEX_DN	LEE_AGING_NEOCORTEX_DN	9	-0.759005	-1.46455	0.0636412	0.778417	0.766846	5	tags=33%, list=1%, signal=34%	FABP5/GPX3/COL6A1
GSE43863_NAIVE_VS_MEMORY_TH1_CD4_TCELL_D150_LCMV_UP	GSE43863_NAIVE_VS_MEMORY_TH1_CD4_TCELL_D150_LCMV_UP	7	-0.773135	-1.39253	0.0636516	0.778417	0.766846	91	tags=71%, list=12%, signal=63%	VCAN/KRT86/TNC/PSMB9/SPARCL1
GOBP_NEGATIVE_REGULATION_OF_GENE_EXPRESSION	GOBP_NEGATIVE_REGULATION_OF_GENE_EXPRESSION	76	-0.472457	-1.3134	0.0637088	0.778417	0.766846	156	tags=34%, list=21%, signal=30%	YWHAB/HSPA1B/HSP90AB1/NPM1/PSMB3/HNRNPM/PSMA2/SRGN/PSMA4/RPS2/LSM1/PSMB4/LTF/PSMB9/PSMA1/NUP214/DHX9/IL1RL1/PSMA3/VSIG4/PSMA5/TSKU/ELANE/PSMA7/PSMB8/SERPINB1
REACTOME_CYTOKINE_SIGNALING_IN_IMMUNE_SYSTEM	REACTOME_CYTOKINE_SIGNALING_IN_IMMUNE_SYSTEM	59	-0.499049	-1.34031	0.0637544	0.778417	0.766846	134	tags=34%, list=18%, signal=30%	PRTN3/NCAM1/PSMB3/PSMA2/PSMA4/LCN2/PSMB4/CSF1R/SDC1/PSMB9/PSMA1/NUP214/IL1RL1/PSMA3/ICAM1/MMP9/TIMP1/PSMA5/PSMA7/PSMB8
GSE10325_LUPUS_BCELL_VS_LUPUS_MYELOID_DN	GSE10325_LUPUS_BCELL_VS_LUPUS_MYELOID_DN	23	-0.594343	-1.38884	0.0638021	0.778417	0.766846	89	tags=30%, list=12%, signal=28%	CSF1R/GOLM1/CTSD/CD163/FTL/CD93/TIMP1
GSE3982_BASOPHIL_VS_TH2_UP	GSE3982_BASOPHIL_VS_TH2_UP	9	-0.740802	-1.42943	0.0639626	0.778417	0.766846	22	tags=22%, list=3%, signal=22%	PTX3/CA3
GSE17721_CTRL_VS_CPG_6H_BMDC_UP	GSE17721_CTRL_VS_CPG_6H_BMDC_UP	17	-0.650752	-1.42493	0.0639777	0.778417	0.766846	90	tags=41%, list=12%, signal=37%	CORO1A/BPGM/GDI2/CD93/MRC1/COL6A1/SELENBP1
GOBP_POSITIVE_REGULATION_OF_TYPE_I_INTERFERON_PRODUCTION	GOBP_POSITIVE_REGULATION_OF_TYPE_I_INTERFERON_PRODUCTION	4	-0.842479	-1.35561	0.0641892	0.778417	0.766846	48	tags=50%, list=7%, signal=47%	CD14/DHX9
NAKAYA_PBMC_FLUAD_MALE_AGE_14_27YO_1D_POSTBOOST_VS_0D_PREIMM_MF59_ADJUVANTED_1DY_ATIV_UP	NAKAYA_PBMC_FLUAD_MALE_AGE_14_27YO_1D_POSTBOOST_VS_0D_PREIMM_MF59_ADJUVANTED_1DY_ATIV_UP	4	-0.841004	-1.35324	0.0641892	0.778417	0.766846	105	tags=75%, list=14%, signal=65%	TYMP/LAP3/ICAM1
BLANCO_MELO_COVID19_SARS_COV_2_LOW_MOI_INFECTION_A594_ACE2_EXPRESSING_CELLS_UP	BLANCO_MELO_COVID19_SARS_COV_2_LOW_MOI_INFECTION_A594_ACE2_EXPRESSING_CELLS_UP	12	-0.686258	-1.41839	0.0642336	0.778417	0.766846	116	tags=33%, list=16%, signal=29%	SAA2/IGFBP1/ICAM1/PTX3
GSE17974_IL4_AND_ANTI_IL12_VS_UNTREATED_0.5H_ACT_CD4_TCELL_UP	GSE17974_IL4_AND_ANTI_IL12_VS_UNTREATED_0.5H_ACT_CD4_TCELL_UP	12	-0.686343	-1.41857	0.0642336	0.778417	0.766846	50	tags=33%, list=7%, signal=32%	OGN/IGFBP1/DDT/PSMA7
LINDSTEDT_DENDRITIC_CELL_MATURATION_A	LINDSTEDT_DENDRITIC_CELL_MATURATION_A	5	-0.815107	-1.37882	0.0642978	0.778417	0.766846	67	tags=80%, list=9%, signal=73%	SOD2/TNC/PSMA3/ICAM1
RICKMAN_METASTASIS_DN	RICKMAN_METASTASIS_DN	14	-0.669474	-1.42329	0.0643777	0.778417	0.766846	161	tags=50%, list=22%, signal=40%	VASP/PDLIM1/TYMP/ACTR3/SDC1/PSMB9/TXN
GSE14415_INDUCED_TREG_VS_FAILED_INDUCED_TREG_DN	GSE14415_INDUCED_TREG_VS_FAILED_INDUCED_TREG_DN	11	-0.697463	-1.4025	0.0644678	0.778417	0.766846	110	tags=55%, list=15%, signal=47%	GSR/SRGN/MYO5A/PSMA1/PTGR1/PSMB8
GSE17721_LPS_VS_GARDIQUIMOD_4H_BMDC_DN	GSE17721_LPS_VS_GARDIQUIMOD_4H_BMDC_DN	11	-0.698511	-1.4046	0.0644678	0.778417	0.766846	161	tags=64%, list=22%, signal=50%	VASP/SEMA4B/SAA1/YWHAG/RPS2/SDC1/B4GALT1
GSE7831_1H_VS_4H_INFLUENZA_STIM_PDC_DN	GSE7831_1H_VS_4H_INFLUENZA_STIM_PDC_DN	11	-0.699628	-1.40685	0.0644678	0.778417	0.766846	89	tags=27%, list=12%, signal=24%	CSF1R/CD93/MPO
GSE21927_SPLEEN_C57BL6_VS_4T1_TUMOR_BALBC_MONOCYTES_DN	GSE21927_SPLEEN_C57BL6_VS_4T1_TUMOR_BALBC_MONOCYTES_DN	13	-0.680413	-1.43613	0.0644699	0.778417	0.766846	117	tags=46%, list=16%, signal=40%	MT1X/LSM1/LAP3/DAG1/PSMA5/PSMB8
BIOCARTA_RAB_PATHWAY	BIOCARTA_RAB_PATHWAY	1	0.97415	1.28546	0.0646465	0.778417	0.766846	20	tags=100%, list=3%, signal=97%	RAB11A
GARGALOVIC_RESPONSE_TO_OXIDIZED_PHOSPHOLIPIDS_RED_DN	GARGALOVIC_RESPONSE_TO_OXIDIZED_PHOSPHOLIPIDS_RED_DN	1	0.97415	1.28546	0.0646465	0.778417	0.766846	20	tags=100%, list=3%, signal=97%	RAB11A
GENTILE_UV_RESPONSE_CLUSTER_D7	GENTILE_UV_RESPONSE_CLUSTER_D7	1	0.97415	1.28546	0.0646465	0.778417	0.766846	20	tags=100%, list=3%, signal=97%	RAB11A
GOBP_ASTRAL_MICROTUBULE_ORGANIZATION	GOBP_ASTRAL_MICROTUBULE_ORGANIZATION	1	0.97415	1.28546	0.0646465	0.778417	0.766846	20	tags=100%, list=3%, signal=97%	RAB11A
GOBP_CYTOPLASMIC_MICROTUBULE_ORGANIZATION	GOBP_CYTOPLASMIC_MICROTUBULE_ORGANIZATION	1	0.97415	1.28546	0.0646465	0.778417	0.766846	20	tags=100%, list=3%, signal=97%	RAB11A
GOBP_ENDOSOME_TO_PLASMA_MEMBRANE_PROTEIN_TRANSPORT	GOBP_ENDOSOME_TO_PLASMA_MEMBRANE_PROTEIN_TRANSPORT	1	0.97415	1.28546	0.0646465	0.778417	0.766846	20	tags=100%, list=3%, signal=97%	RAB11A
GOBP_ESTABLISHMENT_OF_PROTEIN_LOCALIZATION_TO_PLASMA_MEMBRANE	GOBP_ESTABLISHMENT_OF_PROTEIN_LOCALIZATION_TO_PLASMA_MEMBRANE	1	0.97415	1.28546	0.0646465	0.778417	0.766846	20	tags=100%, list=3%, signal=97%	RAB11A
GOBP_ESTABLISHMENT_OF_PROTEIN_LOCALIZATION_TO_POSTSYNAPTIC_MEMBRANE	GOBP_ESTABLISHMENT_OF_PROTEIN_LOCALIZATION_TO_POSTSYNAPTIC_MEMBRANE	1	0.97415	1.28546	0.0646465	0.778417	0.766846	20	tags=100%, list=3%, signal=97%	RAB11A
GOBP_MULTIVESICULAR_BODY_ORGANIZATION	GOBP_MULTIVESICULAR_BODY_ORGANIZATION	1	0.97415	1.28546	0.0646465	0.778417	0.766846	20	tags=100%, list=3%, signal=97%	RAB11A
GOBP_NEUROTRANSMITTER_RECEPTOR_TRANSPORT_ENDOSOME_TO_PLASMA_MEMBRANE	GOBP_NEUROTRANSMITTER_RECEPTOR_TRANSPORT_ENDOSOME_TO_PLASMA_MEMBRANE	1	0.97415	1.28546	0.0646465	0.778417	0.766846	20	tags=100%, list=3%, signal=97%	RAB11A
GOBP_NEUROTRANSMITTER_RECEPTOR_TRANSPORT_TO_PLASMA_MEMBRANE	GOBP_NEUROTRANSMITTER_RECEPTOR_TRANSPORT_TO_PLASMA_MEMBRANE	1	0.97415	1.28546	0.0646465	0.778417	0.766846	20	tags=100%, list=3%, signal=97%	RAB11A
GOBP_PLASMA_MEMBRANE_TO_ENDOSOME_TRANSPORT	GOBP_PLASMA_MEMBRANE_TO_ENDOSOME_TRANSPORT	1	0.97415	1.28546	0.0646465	0.778417	0.766846	20	tags=100%, list=3%, signal=97%	RAB11A
GOBP_POSITIVE_REGULATION_OF_MITOTIC_CELL_CYCLE	GOBP_POSITIVE_REGULATION_OF_MITOTIC_CELL_CYCLE	1	0.97415	1.28546	0.0646465	0.778417	0.766846	20	tags=100%, list=3%, signal=97%	RAB11A
GOBP_POSITIVE_REGULATION_OF_PROTEIN_LOCALIZATION_TO_CELL_PERIPHERY	GOBP_POSITIVE_REGULATION_OF_PROTEIN_LOCALIZATION_TO_CELL_PERIPHERY	1	0.97415	1.28546	0.0646465	0.778417	0.766846	20	tags=100%, list=3%, signal=97%	RAB11A
GOBP_REGULATION_OF_ENDOSOME_SIZE	GOBP_REGULATION_OF_ENDOSOME_SIZE	1	0.97415	1.28546	0.0646465	0.778417	0.766846	20	tags=100%, list=3%, signal=97%	RAB11A
GOBP_REGULATION_OF_LONG_TERM_NEURONAL_SYNAPTIC_PLASTICITY	GOBP_REGULATION_OF_LONG_TERM_NEURONAL_SYNAPTIC_PLASTICITY	1	0.97415	1.28546	0.0646465	0.778417	0.766846	20	tags=100%, list=3%, signal=97%	RAB11A
GOBP_REGULATION_OF_VESICLE_SIZE	GOBP_REGULATION_OF_VESICLE_SIZE	1	0.97415	1.28546	0.0646465	0.778417	0.766846	20	tags=100%, list=3%, signal=97%	RAB11A
GOBP_RENAL_WATER_HOMEOSTASIS	GOBP_RENAL_WATER_HOMEOSTASIS	1	0.97415	1.28546	0.0646465	0.778417	0.766846	20	tags=100%, list=3%, signal=97%	RAB11A
GOBP_RETROGRADE_TRANSPORT_ENDOSOME_TO_PLASMA_MEMBRANE	GOBP_RETROGRADE_TRANSPORT_ENDOSOME_TO_PLASMA_MEMBRANE	1	0.97415	1.28546	0.0646465	0.778417	0.766846	20	tags=100%, list=3%, signal=97%	RAB11A
GOBP_VESICLE_MEDIATED_TRANSPORT_TO_THE_PLASMA_MEMBRANE	GOBP_VESICLE_MEDIATED_TRANSPORT_TO_THE_PLASMA_MEMBRANE	1	0.97415	1.28546	0.0646465	0.778417	0.766846	20	tags=100%, list=3%, signal=97%	RAB11A
GOCC_KINETOCHORE_MICROTUBULE	GOCC_KINETOCHORE_MICROTUBULE	1	0.97415	1.28546	0.0646465	0.778417	0.766846	20	tags=100%, list=3%, signal=97%	RAB11A
GOCC_POSTSYNAPTIC_ENDOSOME	GOCC_POSTSYNAPTIC_ENDOSOME	1	0.97415	1.28546	0.0646465	0.778417	0.766846	20	tags=100%, list=3%, signal=97%	RAB11A
GOCC_POSTSYNAPTIC_RECYCLING_ENDOSOME	GOCC_POSTSYNAPTIC_RECYCLING_ENDOSOME	1	0.97415	1.28546	0.0646465	0.778417	0.766846	20	tags=100%, list=3%, signal=97%	RAB11A
GOMF_SYNTAXIN_BINDING	GOMF_SYNTAXIN_BINDING	1	0.97415	1.28546	0.0646465	0.778417	0.766846	20	tags=100%, list=3%, signal=97%	RAB11A
REACTOME_AQUAPORIN_MEDIATED_TRANSPORT	REACTOME_AQUAPORIN_MEDIATED_TRANSPORT	1	0.97415	1.28546	0.0646465	0.778417	0.766846	20	tags=100%, list=3%, signal=97%	RAB11A
REACTOME_TBC_RABGAPS	REACTOME_TBC_RABGAPS	1	0.97415	1.28546	0.0646465	0.778417	0.766846	20	tags=100%, list=3%, signal=97%	RAB11A
REACTOME_VASOPRESSIN_REGULATES_RENAL_WATER_HOMEOSTASIS_VIA_AQUAPORINS	REACTOME_VASOPRESSIN_REGULATES_RENAL_WATER_HOMEOSTASIS_VIA_AQUAPORINS	1	0.97415	1.28546	0.0646465	0.778417	0.766846	20	tags=100%, list=3%, signal=97%	RAB11A
REACTOME_VXPX_CARGO_TARGETING_TO_CILIUM	REACTOME_VXPX_CARGO_TARGETING_TO_CILIUM	1	0.97415	1.28546	0.0646465	0.778417	0.766846	20	tags=100%, list=3%, signal=97%	RAB11A
GSE17721_PAM3CSK4_VS_CPG_6H_BMDC_DN	GSE17721_PAM3CSK4_VS_CPG_6H_BMDC_DN	10	-0.721115	-1.42857	0.0646617	0.778417	0.766846	67	tags=40%, list=9%, signal=37%	VCAN/TNC/MPO/NUCB1
GSE42724_NAIVE_BCELL_VS_PLASMABLAST_UP	GSE42724_NAIVE_BCELL_VS_PLASMABLAST_UP	10	-0.720762	-1.42787	0.0646617	0.778417	0.766846	105	tags=40%, list=14%, signal=35%	TYMP/PSMA4/LAP3/PSMB9
GOBP_REGULATION_OF_MACROPHAGE_CHEMOTAXIS	GOBP_REGULATION_OF_MACROPHAGE_CHEMOTAXIS	6	-0.791731	-1.39393	0.0646766	0.778417	0.766846	89	tags=33%, list=12%, signal=30%	CSF1R/DDT
GOBP_REGULATION_OF_MACROPHAGE_MIGRATION	GOBP_REGULATION_OF_MACROPHAGE_MIGRATION	6	-0.791731	-1.39393	0.0646766	0.778417	0.766846	89	tags=33%, list=12%, signal=30%	CSF1R/DDT
GSE21033_CTRL_VS_POLYIC_STIM_DC_24H_DN	GSE21033_CTRL_VS_POLYIC_STIM_DC_24H_DN	6	-0.791575	-1.39366	0.0646766	0.778417	0.766846	18	tags=67%, list=2%, signal=66%	PSMB3/PSMA5/PSMA7/PSMB8
KEGG_REGULATION_OF_ACTIN_CYTOSKELETON	KEGG_REGULATION_OF_ACTIN_CYTOSKELETON	18	0.554019	1.47755	0.0649714	0.778417	0.766846	85	tags=17%, list=12%, signal=15%	ARPC1B/RAC1/MSN
GOBP_NEURON_DEATH	GOBP_NEURON_DEATH	15	-0.658724	-1.40947	0.0650289	0.778417	0.766846	189	tags=47%, list=26%, signal=35%	SOD2/PCSK9/HSP90AB1/GBE1/CORO1A/SNCA/CHGA
GOBP_CONNECTIVE_TISSUE_REPLACEMENT	GOBP_CONNECTIVE_TISSUE_REPLACEMENT	1	-0.97415	-1.28911	0.0650888	0.778417	0.766846	21	tags=100%, list=3%, signal=97%
GOBP_INFLAMMATORY_RESPONSE_TO_WOUNDING	GOBP_INFLAMMATORY_RESPONSE_TO_WOUNDING	1	-0.97415	-1.28911	0.0650888	0.778417	0.766846	21	tags=100%, list=3%, signal=97%
GOBP_NEGATIVE_REGULATION_OF_MEMBRANE_PROTEIN_ECTODOMAIN_PROTEOLYSIS	GOBP_NEGATIVE_REGULATION_OF_MEMBRANE_PROTEIN_ECTODOMAIN_PROTEOLYSIS	1	-0.97415	-1.28911	0.0650888	0.778417	0.766846	21	tags=100%, list=3%, signal=97%
GOBP_NEGATIVE_REGULATION_OF_METALLOPEPTIDASE_ACTIVITY	GOBP_NEGATIVE_REGULATION_OF_METALLOPEPTIDASE_ACTIVITY	1	-0.97415	-1.28911	0.0650888	0.778417	0.766846	21	tags=100%, list=3%, signal=97%
GOBP_PIGMENT_BIOSYNTHETIC_PROCESS	GOBP_PIGMENT_BIOSYNTHETIC_PROCESS	1	-0.97551	-1.29091	0.0650888	0.778417	0.766846	20	tags=100%, list=3%, signal=97%
GOBP_REGULATION_OF_METALLOPEPTIDASE_ACTIVITY	GOBP_REGULATION_OF_METALLOPEPTIDASE_ACTIVITY	1	-0.97415	-1.28911	0.0650888	0.778417	0.766846	21	tags=100%, list=3%, signal=97%
GOBP_SECONDARY_METABOLITE_BIOSYNTHETIC_PROCESS	GOBP_SECONDARY_METABOLITE_BIOSYNTHETIC_PROCESS	1	-0.97551	-1.29091	0.0650888	0.778417	0.766846	20	tags=100%, list=3%, signal=97%
GOBP_WOUND_HEALING_INVOLVED_IN_INFLAMMATORY_RESPONSE	GOBP_WOUND_HEALING_INVOLVED_IN_INFLAMMATORY_RESPONSE	1	-0.97415	-1.28911	0.0650888	0.778417	0.766846	21	tags=100%, list=3%, signal=97%
MARSON_FOXP3_TARGETS_DN	MARSON_FOXP3_TARGETS_DN	1	-0.97551	-1.29091	0.0650888	0.778417	0.766846	20	tags=100%, list=3%, signal=97%
RUAN_RESPONSE_TO_TNF_TROGLITAZONE_DN	RUAN_RESPONSE_TO_TNF_TROGLITAZONE_DN	7	-0.770421	-1.38764	0.0653266	0.778417	0.766846	3	tags=57%, list=0%, signal=57%	ORM1/IDH1/RETN/SELENBP1
WP_PROTEASOME_DEGRADATION	WP_PROTEASOME_DEGRADATION	17	-0.648476	-1.41995	0.0653686	0.778417	0.766846	129	tags=59%, list=18%, signal=50%	PSMB3/PSMA2/PSMA4/PSMB4/PSMB9/PSMA1/PSMA3/PSMA5/PSMA7/PSMB8
LIAN_LIPA_TARGETS_3M	LIAN_LIPA_TARGETS_3M	9	-0.739766	-1.42743	0.0655226	0.778417	0.766846	63	tags=44%, list=9%, signal=41%	CAMP/FCGR2A/MYO5A/S100A9
GOBP_CELLULAR_IRON_ION_HOMEOSTASIS	GOBP_CELLULAR_IRON_ION_HOMEOSTASIS	9	-0.75618	-1.4591	0.0655269	0.778417	0.766846	119	tags=44%, list=16%, signal=38%	FTH1/LCN2/LTF/FTL
BRUINS_UVC_RESPONSE_LATE	BRUINS_UVC_RESPONSE_LATE	51	-0.511798	-1.34656	0.065534	0.778417	0.766846	144	tags=37%, list=20%, signal=32%	YWHAB/NPM1/KRT16/KRT1/COL6A3/PSMA4/FABP1/FSTL1/TNC/MYO5A/CSRP1/PSMA1/OGN/FBLN5/PTGR1/PTX3/PSMA5/B4GALT1/COL6A1
GOBP_RAC_PROTEIN_SIGNAL_TRANSDUCTION	GOBP_RAC_PROTEIN_SIGNAL_TRANSDUCTION	2	0.938692	1.3375	0.0656455	0.778417	0.766846	47	tags=100%, list=6%, signal=94%	CDH13/RAC1
GOBP_REGULATION_OF_POTASSIUM_ION_TRANSMEMBRANE_TRANSPORTER_ACTIVITY	GOBP_REGULATION_OF_POTASSIUM_ION_TRANSMEMBRANE_TRANSPORTER_ACTIVITY	2	0.940054	1.33944	0.0656455	0.778417	0.766846	46	tags=100%, list=6%, signal=94%	FHL1/YWHAE
PID_ARF6_DOWNSTREAM_PATHWAY	PID_ARF6_DOWNSTREAM_PATHWAY	2	0.938692	1.3375	0.0656455	0.778417	0.766846	47	tags=100%, list=6%, signal=94%	RAB11A/RAC1
PID_LIS1_PATHWAY	PID_LIS1_PATHWAY	2	0.938692	1.3375	0.0656455	0.778417	0.766846	47	tags=100%, list=6%, signal=94%	YWHAE/RAC1
PID_RAC1_REG_PATHWAY	PID_RAC1_REG_PATHWAY	2	0.938692	1.3375	0.0656455	0.778417	0.766846	47	tags=100%, list=6%, signal=94%	ARHGDIA/RAC1
GSE29614_CTRL_VS_DAY3_TIV_FLU_VACCINE_PBMC_UP	GSE29614_CTRL_VS_DAY3_TIV_FLU_VACCINE_PBMC_UP	5	0.816492	1.47479	0.0656934	0.778417	0.766846	99	tags=60%, list=13%, signal=52%	SERPINE1/PEBP4/PHB
GOBP_POTASSIUM_ION_TRANSPORT	GOBP_POTASSIUM_ION_TRANSPORT	3	0.894452	1.39823	0.0657596	0.778417	0.766846	46	tags=67%, list=6%, signal=63%	FHL1/YWHAE
GOBP_REGULATION_OF_POTASSIUM_ION_TRANSPORT	GOBP_REGULATION_OF_POTASSIUM_ION_TRANSPORT	3	0.894452	1.39823	0.0657596	0.778417	0.766846	46	tags=67%, list=6%, signal=63%	FHL1/YWHAE
GOBP_REGULATION_OF_MRNA_METABOLIC_PROCESS	GOBP_REGULATION_OF_MRNA_METABOLIC_PROCESS	32	-0.557053	-1.37084	0.0658228	0.778417	0.766846	188	tags=72%, list=26%, signal=56%	HNRNPK/NCL/XPO1/UBC/PSMA6/HNRNPC/PSMB5/YWHAB/NPM1/PSMB3/HNRNPM/PSMA2/PSMA4/PSMB4/HNRNPA1/PSMB9/PSMA1/NUP214/DHX9/PSMA3/PSMA5/PSMA7/PSMB8
SANSOM_WNT_PATHWAY_REQUIRE_MYC	SANSOM_WNT_PATHWAY_REQUIRE_MYC	3	-0.889346	-1.3274	0.0658363	0.778417	0.766846	72	tags=67%, list=10%, signal=60%	APOD/IGFBP2
WP_MIRNAS_INVOLVEMENT_IN_THE_IMMUNE_RESPONSE_IN_SEPSIS	WP_MIRNAS_INVOLVEMENT_IN_THE_IMMUNE_RESPONSE_IN_SEPSIS	4	-0.840714	-1.35277	0.0658784	0.778417	0.766846	101	tags=75%, list=14%, signal=65%	LCN2/ICAM1/ELANE
CHENG_RESPONSE_TO_NICKEL_ACETATE	CHENG_RESPONSE_TO_NICKEL_ACETATE	5	-0.832095	-1.40755	0.0659577	0.778417	0.766846	95	tags=60%, list=13%, signal=53%	CP/ACTR2/GDI2
GSE17721_4_VS_24H_GARDIQUIMOD_BMDC_UP	GSE17721_4_VS_24H_GARDIQUIMOD_BMDC_UP	11	-0.696663	-1.40089	0.065967	0.778417	0.766846	78	tags=36%, list=11%, signal=33%	MB/MYO5A/CD93/SERPINB1
WANG_RESPONSE_TO_GSK3_INHIBITOR_SB216763_UP	WANG_RESPONSE_TO_GSK3_INHIBITOR_SB216763_UP	11	-0.696656	-1.40087	0.065967	0.778417	0.766846	135	tags=45%, list=18%, signal=38%	HPD/ENPP2/MYO5A/LTA4H/AMY1A
GOBP_DISACCHARIDE_BIOSYNTHETIC_PROCESS	GOBP_DISACCHARIDE_BIOSYNTHETIC_PROCESS	2	-0.925962	-1.28683	0.066055	0.778417	0.766846	11	tags=100%, list=1%, signal=99%	B4GALT1
GOBP_DISACCHARIDE_METABOLIC_PROCESS	GOBP_DISACCHARIDE_METABOLIC_PROCESS	2	-0.925962	-1.28683	0.066055	0.778417	0.766846	11	tags=100%, list=1%, signal=99%	B4GALT1
GOBP_OLIGOSACCHARIDE_BIOSYNTHETIC_PROCESS	GOBP_OLIGOSACCHARIDE_BIOSYNTHETIC_PROCESS	2	-0.925962	-1.28683	0.066055	0.778417	0.766846	11	tags=100%, list=1%, signal=99%	B4GALT1
GSE34156_UNTREATED_VS_24H_NOD2_AND_TLR1_TLR2_LIGAND_TREATED_MONOCYTE_DN	GSE34156_UNTREATED_VS_24H_NOD2_AND_TLR1_TLR2_LIGAND_TREATED_MONOCYTE_DN	2	-0.927689	-1.28922	0.066055	0.778417	0.766846	38	tags=100%, list=5%, signal=95%	PTGR1
GSE39820_TGFBETA1_IL6_VS_TGFBETA1_IL6_IL23A_TREATED_CD4_TCELL_UP	GSE39820_TGFBETA1_IL6_VS_TGFBETA1_IL6_IL23A_TREATED_CD4_TCELL_UP	2	-0.926821	-1.28802	0.066055	0.778417	0.766846	21	tags=100%, list=3%, signal=97%	TIMP1
GSE40685_NAIVE_CD4_TCELL_VS_TREG_DN	GSE40685_NAIVE_CD4_TCELL_VS_TREG_DN	2	-0.926513	-1.28759	0.066055	0.778417	0.766846	27	tags=100%, list=4%, signal=97%	MPO
HP_DECREASED_PATELLAR_REFLEX	HP_DECREASED_PATELLAR_REFLEX	2	-0.925333	-1.28595	0.066055	0.778417	0.766846	49	tags=100%, list=7%, signal=94%	FBLN5
HP_ENTEROCOLITIS	HP_ENTEROCOLITIS	2	-0.92745	-1.28889	0.066055	0.778417	0.766846	15	tags=100%, list=2%, signal=98%	ELANE
GOMF_EXOGENOUS_PROTEIN_BINDING	GOMF_EXOGENOUS_PROTEIN_BINDING	10	-0.718333	-1.42306	0.0661654	0.778417	0.766846	35	tags=50%, list=5%, signal=48%	HSPA1B/NCAM1/DAG1/ICAM1/MRC1
GSE40273_GATA1_KO_VS_WT_TREG_UP	GSE40273_GATA1_KO_VS_WT_TREG_UP	10	-0.719746	-1.42586	0.0661654	0.778417	0.766846	103	tags=40%, list=14%, signal=35%	GOT2/PRKCSH/FTL/LGALS1
GSE40685_NAIVE_CD4_TCELL_VS_FOXP3_KO_TREG_PRECURSOR_UP	GSE40685_NAIVE_CD4_TCELL_VS_FOXP3_KO_TREG_PRECURSOR_UP	10	-0.720066	-1.42649	0.0661654	0.778417	0.766846	116	tags=40%, list=16%, signal=34%	SAA2/GOLM1/LGALS1/B4GALT1
SASSON_RESPONSE_TO_GONADOTROPHINS_DN	SASSON_RESPONSE_TO_GONADOTROPHINS_DN	9	0.710863	1.52331	0.066219	0.778543	0.766971	203	tags=78%, list=28%, signal=57%	CAPZA1/ILK/TPM2/ACTG2/ACTN1/THBS1/TLN1
GSE9988_ANTI_TREM1_VS_LOW_LPS_MONOCYTE_DN	GSE9988_ANTI_TREM1_VS_LOW_LPS_MONOCYTE_DN	6	-0.791471	-1.39347	0.066335	0.779404	0.767819	30	tags=100%, list=4%, signal=97%	PSMA6/HNRNPC/UGP2/ICAM1/PTX3
GOBP_RESPONSE_TO_CYTOKINE	GOBP_RESPONSE_TO_CYTOKINE	96	-0.458157	-1.31167	0.0664452	0.77998	0.768386	153	tags=32%, list=21%, signal=29%	HSPA1B/HSP90AB1/SAA1/PRTN3/NCAM1/PSMB3/PSMA2/MT1X/PSMA4/LCN2/ACTR2/PSMB4/CORO1A/CSF1R/SNCA/ACTR3/SDC1/REG1A/PSMB9/PSMA1/DHX9/IL1RL1/PSMA3/ICAM1/MMP9/TIMP1/PSMA5/PSMA7/PSMB8/MRC1/CHI3L1
GSE360_DC_VS_MAC_L_MAJOR_DN	GSE360_DC_VS_MAC_L_MAJOR_DN	9	-0.755243	-1.45729	0.0664697	0.77998	0.768386	4	tags=33%, list=1%, signal=34%	FCGR3A/CAMP/S100A9
GOBP_NEGATIVE_REGULATION_OF_EPITHELIAL_CELL_PROLIFERATION	GOBP_NEGATIVE_REGULATION_OF_EPITHELIAL_CELL_PROLIFERATION	7	0.746289	1.49538	0.0666667	0.780379	0.768779	21	tags=14%, list=3%, signal=14%	SPARC
HP_INTRAVENTRICULAR_HEMORRHAGE	HP_INTRAVENTRICULAR_HEMORRHAGE	1	0.972789	1.28367	0.0666667	0.780379	0.768779	21	tags=100%, list=3%, signal=97%	SPARC
DER_IFN_GAMMA_RESPONSE_DN	DER_IFN_GAMMA_RESPONSE_DN	1	-0.972789	-1.28731	0.0670611	0.780379	0.768779	22	tags=100%, list=3%, signal=97%
GOBP_ANTRAL_OVARIAN_FOLLICLE_GROWTH	GOBP_ANTRAL_OVARIAN_FOLLICLE_GROWTH	1	-0.972789	-1.28731	0.0670611	0.780379	0.768779	22	tags=100%, list=3%, signal=97%
GOMF_AMYLASE_ACTIVITY	GOMF_AMYLASE_ACTIVITY	1	-0.971429	-1.28551	0.0670611	0.780379	0.768779	23	tags=100%, list=3%, signal=97%
GOMF_CHLORIDE_ION_BINDING	GOMF_CHLORIDE_ION_BINDING	1	-0.971429	-1.28551	0.0670611	0.780379	0.768779	23	tags=100%, list=3%, signal=97%
HOEK_MYELOID_DENDRITIC_CELL_2011_2012_TIV_ADULT_7DY_UP	HOEK_MYELOID_DENDRITIC_CELL_2011_2012_TIV_ADULT_7DY_UP	1	-0.972789	-1.28731	0.0670611	0.780379	0.768779	22	tags=100%, list=3%, signal=97%
KEGG_ASTHMA	KEGG_ASTHMA	1	-0.970068	-1.28371	0.0670611	0.780379	0.768779	24	tags=100%, list=3%, signal=97%
MARCINIAK_ER_STRESS_RESPONSE_VIA_CHOP	MARCINIAK_ER_STRESS_RESPONSE_VIA_CHOP	1	-0.972789	-1.28731	0.0670611	0.780379	0.768779	22	tags=100%, list=3%, signal=97%
REACTOME_DIGESTION	REACTOME_DIGESTION	1	-0.971429	-1.28551	0.0670611	0.780379	0.768779	23	tags=100%, list=3%, signal=97%
REACTOME_DIGESTION_AND_ABSORPTION	REACTOME_DIGESTION_AND_ABSORPTION	1	-0.971429	-1.28551	0.0670611	0.780379	0.768779	23	tags=100%, list=3%, signal=97%
REACTOME_DIGESTION_OF_DIETARY_CARBOHYDRATE	REACTOME_DIGESTION_OF_DIETARY_CARBOHYDRATE	1	-0.971429	-1.28551	0.0670611	0.780379	0.768779	23	tags=100%, list=3%, signal=97%
VERNELL_RETINOBLASTOMA_PATHWAY_UP	VERNELL_RETINOBLASTOMA_PATHWAY_UP	1	-0.972789	-1.28731	0.0670611	0.780379	0.768779	22	tags=100%, list=3%, signal=97%
HP_SHORT_DIGIT	HP_SHORT_DIGIT	10	0.694884	1.52339	0.0671666	0.780452	0.768851	212	tags=70%, list=29%, signal=51%	RAC1/AIFM1/IGF2/MGP/RPS7/AHSG/FLNA
GSE1432_1H_VS_24H_IFNG_MICROGLIA_DN	GSE1432_1H_VS_24H_IFNG_MICROGLIA_DN	21	-0.61282	-1.40502	0.0672043	0.780452	0.768851	192	tags=48%, list=26%, signal=36%	PDIA3/MTHFD1/BIN2/IGFBP4/PSMA2/TYMP/PSMA4/LAP3/PSMB9/PSMB8
GSE37301_HEMATOPOIETIC_STEM_CELL_VS_COMMON_LYMPHOID_PROGENITOR_UP	GSE37301_HEMATOPOIETIC_STEM_CELL_VS_COMMON_LYMPHOID_PROGENITOR_UP	16	0.575331	1.46466	0.0672325	0.780452	0.768851	23	tags=19%, list=3%, signal=19%	CD59/PRSS2/SERPINE1
GOBP_PHOSPHATIDYLCHOLINE_METABOLIC_PROCESS	GOBP_PHOSPHATIDYLCHOLINE_METABOLIC_PROCESS	14	-0.665703	-1.41528	0.0672389	0.780452	0.768851	141	tags=36%, list=19%, signal=29%	LIPC/ENPP2/FABP3/APOA5/PLA2G2A
GSE360_CTRL_VS_L_MAJOR_MAC_UP	GSE360_CTRL_VS_L_MAJOR_MAC_UP	13	-0.675588	-1.42595	0.0673352	0.781072	0.769462	109	tags=38%, list=15%, signal=33%	PEBP1/GDI2/CD163/GANAB/PSMA7
GOBP_LIPOPROTEIN_CATABOLIC_PROCESS	GOBP_LIPOPROTEIN_CATABOLIC_PROCESS	3	-0.888418	-1.32601	0.0676157	0.78241	0.77078	74	tags=67%, list=10%, signal=60%	APOB/CTSD
HP_GINGIVITIS	HP_GINGIVITIS	3	-0.888455	-1.32606	0.0676157	0.78241	0.77078	15	tags=67%, list=2%, signal=66%	CAT/ELANE
GOBP_RAS_PROTEIN_SIGNAL_TRANSDUCTION	GOBP_RAS_PROTEIN_SIGNAL_TRANSDUCTION	13	0.623448	1.45937	0.0677549	0.78241	0.77078	47	tags=23%, list=6%, signal=22%	CDH13/ARHGDIA/RAC1
GOBP_RESPONSE_TO_INORGANIC_SUBSTANCE	GOBP_RESPONSE_TO_INORGANIC_SUBSTANCE	57	-0.495236	-1.32383	0.0678571	0.78241	0.77078	130	tags=28%, list=18%, signal=25%	CPS1/MT1X/SORD/FABP1/HNRNPA1/MB/PKLR/SNCA/IGFBP2/SDC1/TXN/FBLN5/ICAM1/MPO/MMP9/S100A8
GOBP_POSITIVE_REGULATION_OF_I_KAPPAB_KINASE_NF_KAPPAB_SIGNALING	GOBP_POSITIVE_REGULATION_OF_I_KAPPAB_KINASE_NF_KAPPAB_SIGNALING	6	-0.787366	-1.38625	0.0679934	0.78241	0.77078	60	tags=50%, list=8%, signal=46%	TFRC/LTF/LGALS1
HP_PREMATURELY_AGED_APPEARANCE	HP_PREMATURELY_AGED_APPEARANCE	6	-0.788503	-1.38825	0.0679934	0.78241	0.77078	63	tags=67%, list=9%, signal=61%	NPM1/MYO5A/FBLN5/PSMB8
DEBIASI_APOPTOSIS_BY_REOVIRUS_INFECTION_DN	DEBIASI_APOPTOSIS_BY_REOVIRUS_INFECTION_DN	16	-0.652147	-1.42326	0.0682451	0.78241	0.77078	172	tags=44%, list=23%, signal=34%	HYOU1/VCAN/ENPP2/LASP1/DHX9/DAG1/SELENBP1
DEURIG_T_CELL_PROLYMPHOCYTIC_LEUKEMIA_UP	DEURIG_T_CELL_PROLYMPHOCYTIC_LEUKEMIA_UP	16	-0.652472	-1.42397	0.0682451	0.78241	0.77078	173	tags=56%, list=24%, signal=44%	COL18A1/HSP90AB1/ENPP2/SORD/TKT/IGKV1D-13/NUP214/MCAM/MMP9
GSE360_DC_VS_MAC_M_TUBERCULOSIS_UP	GSE360_DC_VS_MAC_M_TUBERCULOSIS_UP	16	-0.6508	-1.42032	0.0682451	0.78241	0.77078	151	tags=56%, list=21%, signal=46%	KRT2/FABP4/CFHR3/CDH1/HSP90AB1/ENPP2/TXN/PSMA5/MRC1
GOCC_CHYLOMICRON	GOCC_CHYLOMICRON	9	-0.737944	-1.42391	0.0686427	0.78241	0.77078	42	tags=56%, list=6%, signal=53%	APOH/APOB/APOA4/APOC3/APOA5
GSE13738_TCR_VS_BYSTANDER_ACTIVATED_CD4_TCELL_DN	GSE13738_TCR_VS_BYSTANDER_ACTIVATED_CD4_TCELL_DN	9	-0.735726	-1.41963	0.0686427	0.78241	0.77078	54	tags=56%, list=7%, signal=52%	UBC/GSR/TXN/FTL/DAG1
GSE22886_NAIVE_TCELL_VS_MONOCYTE_DN	GSE22886_NAIVE_TCELL_VS_MONOCYTE_DN	14	-0.664379	-1.41246	0.0686695	0.78241	0.77078	36	tags=29%, list=5%, signal=28%	VCAN/FTL/CD93/S100A9
GSE2770_IL12_VS_TGFB_AND_IL12_TREATED_ACT_CD4_TCELL_48H_UP	GSE2770_IL12_VS_TGFB_AND_IL12_TREATED_ACT_CD4_TCELL_48H_UP	14	-0.662289	-1.40802	0.0686695	0.78241	0.77078	55	tags=29%, list=7%, signal=27%	NID1/SPP1/PTGR1/CD93
GSE43863_NAIVE_VS_MEMORY_TFH_CD4_TCELL_D150_LCMV_UP	GSE43863_NAIVE_VS_MEMORY_TFH_CD4_TCELL_D150_LCMV_UP	13	0.623082	1.45851	0.068744	0.78241	0.77078	208	tags=69%, list=28%, signal=51%	CNN2/EEF2/LNPEP/MSN/WDR1/CA2/ITGB3/THBS1/MYH9
GOBP_TISSUE_REGENERATION	GOBP_TISSUE_REGENERATION	8	-0.752158	-1.41616	0.0688	0.78241	0.77078	44	tags=38%, list=6%, signal=36%	IGFBP1/APOA5/DAG1
GOBP_NEGATIVE_REGULATION_OF_FIBRINOLYSIS	GOBP_NEGATIVE_REGULATION_OF_FIBRINOLYSIS	8	0.716065	1.47658	0.0689655	0.78241	0.77078	23	tags=12%, list=3%, signal=12%	SERPINE1
GOBP_MODULATION_OF_PROCESS_OF_OTHER_ORGANISM	GOBP_MODULATION_OF_PROCESS_OF_OTHER_ORGANISM	18	-0.636053	-1.40426	0.0692521	0.78241	0.77078	126	tags=44%, list=17%, signal=38%	DEFA3/REG3A/CSF1R/REG1A/LTF/DAG1/PTX3/S100A9
GOBP_LEUKOCYTE_MEDIATED_IMMUNITY	GOBP_LEUKOCYTE_MEDIATED_IMMUNITY	180	-0.40698	-1.22757	0.069255	0.78241	0.77078	120	tags=16%, list=16%, signal=17%	PSMA2/FTH1/PYGL/GPI/LCN2/ACTR2/CORO1A/CTSD/CHGA/LTF/GDI2/IGHV3-16/FTL/IGHA2/CD93/LTA4H/ICAM1/MPO/MMP9/PRG2/PTX3/PSMA5/S100A8/ELANE/B4GALT1/SERPINB1/CHI3L1/S100A9
ANDERSEN_LIVER_CANCER_KRT19_DN	ANDERSEN_LIVER_CANCER_KRT19_DN	16	-0.648888	-1.41615	0.0696379	0.78241	0.77078	77	tags=25%, list=10%, signal=23%	PKLR/APOA5/PTGR1/SELENBP1
GOBP_PROCESS_UTILIZING_AUTOPHAGIC_MECHANISM	GOBP_PROCESS_UTILIZING_AUTOPHAGIC_MECHANISM	16	-0.648412	-1.41511	0.0696379	0.78241	0.77078	76	tags=19%, list=10%, signal=17%	SNCA/S100A8/S100A9
GOMF_GROWTH_FACTOR_BINDING	GOMF_GROWTH_FACTOR_BINDING	16	-0.648639	-1.41561	0.0696379	0.78241	0.77078	163	tags=56%, list=22%, signal=45%	IGFBP7/IGFBP6/NRP1/IGFBP4/RPS2/IGFBP2/IGFBP1/TSKU/COL6A1
HP_RESPIRATORY_FAILURE	HP_RESPIRATORY_FAILURE	16	-0.650056	-1.4187	0.0696379	0.78241	0.77078	108	tags=31%, list=15%, signal=27%	COL6A3/HNRNPA1/CTSD/DAG1/COL6A1
GSE2770_IL12_AND_TGFB_ACT_VS_ACT_CD4_TCELL_6H_UP	GSE2770_IL12_AND_TGFB_ACT_VS_ACT_CD4_TCELL_6H_UP	6	-0.785908	-1.38368	0.0696517	0.78241	0.77078	143	tags=67%, list=19%, signal=54%	PDLIM1/MMRN1/COL6A3/KRT86
LIM_MAMMARY_LUMINAL_PROGENITOR_UP	LIM_MAMMARY_LUMINAL_PROGENITOR_UP	6	-0.784744	-1.38163	0.0696517	0.78241	0.77078	16	tags=50%, list=2%, signal=49%	PIGR/LBP/S100A8
BOWIE_RESPONSE_TO_EXTRACELLULAR_MATRIX	BOWIE_RESPONSE_TO_EXTRACELLULAR_MATRIX	2	-0.923706	-1.28369	0.0697248	0.78241	0.77078	59	tags=100%, list=8%, signal=92%	PSMB8
GARGALOVIC_RESPONSE_TO_OXIDIZED_PHOSPHOLIPIDS_TURQUOISE_UP	GARGALOVIC_RESPONSE_TO_OXIDIZED_PHOSPHOLIPIDS_TURQUOISE_UP	2	-0.923973	-1.28406	0.0697248	0.78241	0.77078	38	tags=100%, list=5%, signal=95%	PTGR1
GOCC_SPERMATOPROTEASOME_COMPLEX	GOCC_SPERMATOPROTEASOME_COMPLEX	2	-0.923706	-1.28369	0.0697248	0.78241	0.77078	59	tags=100%, list=8%, signal=92%	PSMB8
KUROZUMI_RESPONSE_TO_ONCOCYTIC_VIRUS	KUROZUMI_RESPONSE_TO_ONCOCYTIC_VIRUS	2	-0.923691	-1.28367	0.0697248	0.78241	0.77078	55	tags=100%, list=7%, signal=93%	SPP1
GOCC_MICROTUBULE_CYTOSKELETON	GOCC_MICROTUBULE_CYTOSKELETON	38	0.435135	1.35453	0.0698869	0.78241	0.77078	131	tags=42%, list=18%, signal=36%	DCXR/RAB11A/TUBB8/CCT2/CCT6A/TUBA8/YWHAE/ALDOB/CBX1/CLTC/HNRNPU/DBH/TUBA1C/HSPA6/HSPB1/ACTG2
GSE17301_ACD3_ACD28_VS_ACD3_ACD28_AND_IFNA5_STIM_CD8_TCELL_DN	GSE17301_ACD3_ACD28_VS_ACD3_ACD28_AND_IFNA5_STIM_CD8_TCELL_DN	13	-0.671895	-1.41815	0.0702006	0.78241	0.77078	157	tags=54%, list=21%, signal=43%	PTGDS/CDH1/ENPP2/MYO5A/CD93/B4GALT1/SERPINB1
GSE5589_UNSTIM_VS_180MIN_LPS_STIM_MACROPHAGE_UP	GSE5589_UNSTIM_VS_180MIN_LPS_STIM_MACROPHAGE_UP	13	-0.67245	-1.41933	0.0702006	0.78241	0.77078	172	tags=54%, list=23%, signal=42%	HYOU1/DDX54/ASL/LAP3/GOLM1/PTGR1/SELENBP1
HP_ABNORMALITY_OF_THE_ULNA	HP_ABNORMALITY_OF_THE_ULNA	7	-0.768563	-1.38429	0.0703518	0.78241	0.77078	88	tags=57%, list=12%, signal=51%	COLEC11/B2M/COLEC10/MMP9
KAAB_FAILED_HEART_VENTRICLE_DN	KAAB_FAILED_HEART_VENTRICLE_DN	7	-0.76769	-1.38272	0.0703518	0.78241	0.77078	8	tags=29%, list=1%, signal=29%	SERPINA3/SERPINB1
GOBP_ANIMAL_ORGAN_MORPHOGENESIS	GOBP_ANIMAL_ORGAN_MORPHOGENESIS	48	-0.511602	-1.33603	0.0703884	0.78241	0.77078	129	tags=46%, list=18%, signal=40%	PSMA6/MTHFD1/FGL1/COL18A1/PSMB5/NRP1/PSMB3/PSMA2/PSMA4/PSMB4/CSF1R/TNC/SDC1/LTF/PSMB9/PSMA1/PSMA3/DAG1/PSMA5/TSKU/PSMA7/PSMB8
GSE24574_BCL6_LOW_TFH_VS_NAIVE_CD4_TCELL_DN	GSE24574_BCL6_LOW_TFH_VS_NAIVE_CD4_TCELL_DN	11	-0.694761	-1.39706	0.0704648	0.78241	0.77078	78	tags=36%, list=11%, signal=33%	MB/BHMT/TIMP1/SPARCL1
GOBP_CHEMICAL_HOMEOSTASIS	GOBP_CHEMICAL_HOMEOSTASIS	74	-0.472986	-1.31213	0.070615	0.78241	0.77078	152	tags=32%, list=21%, signal=29%	SLC4A1/SAA1/LIPC/KRT16/KRT1/CPS1/FABP3/CES1/FTH1/PYGL/MT1X/LCN2/CORO1A/SNCA/REG1A/LTF/APOA5/FTL/LGALS1/ICAM1/TSKU/S100A8/ELANE/S100A9
GSE12366_PLASMA_CELL_VS_MEMORY_BCELL_UP	GSE12366_PLASMA_CELL_VS_MEMORY_BCELL_UP	12	0.649327	1.48082	0.0706675	0.78241	0.77078	48	tags=25%, list=7%, signal=24%	PI16/PSAT1/GSTP1
BROWNE_HCMV_INFECTION_48HR_DN	BROWNE_HCMV_INFECTION_48HR_DN	41	-0.526498	-1.33413	0.0707071	0.78241	0.77078	210	tags=39%, list=29%, signal=30%	LIMS1/NAP1L1/IGFBP6/ACTG1/PYGM/PSG4/IGFBP4/PSG3/ENPP2/CORO1A/SPTB/SDC1/SPP1/FBLN5/PSMB8/COL6A1
GOMF_HORMONE_BINDING	GOMF_HORMONE_BINDING	7	0.774392	1.55169	0.0709039	0.78241	0.77078	4	tags=14%, list=1%, signal=14%	CDH13
GSE27786_LIN_NEG_VS_NKCELL_UP	GSE27786_LIN_NEG_VS_NKCELL_UP	7	0.774024	1.55096	0.0709039	0.78241	0.77078	111	tags=57%, list=15%, signal=49%	TNXB/BLVRB/TPM2/G3BP1
BAKER_HEMATOPOESIS_STAT1_TARGETS	BAKER_HEMATOPOESIS_STAT1_TARGETS	1	-0.968707	-1.28191	0.0710059	0.78241	0.77078	25	tags=100%, list=3%, signal=97%
BAKER_HEMATOPOIESIS_STAT3_TARGETS	BAKER_HEMATOPOIESIS_STAT3_TARGETS	1	-0.968707	-1.28191	0.0710059	0.78241	0.77078	25	tags=100%, list=3%, signal=97%
GOBP_NEGATIVE_REGULATION_OF_INTERLEUKIN_2_PRODUCTION	GOBP_NEGATIVE_REGULATION_OF_INTERLEUKIN_2_PRODUCTION	1	-0.967347	-1.28011	0.0710059	0.78241	0.77078	26	tags=100%, list=4%, signal=97%
GOBP_NEGATIVE_REGULATION_OF_MACROPHAGE_ACTIVATION	GOBP_NEGATIVE_REGULATION_OF_MACROPHAGE_ACTIVATION	1	-0.967347	-1.28011	0.0710059	0.78241	0.77078	26	tags=100%, list=4%, signal=97%
GOBP_NEUROINFLAMMATORY_RESPONSE	GOBP_NEUROINFLAMMATORY_RESPONSE	1	-0.968707	-1.28191	0.0710059	0.78241	0.77078	25	tags=100%, list=3%, signal=97%
GOBP_POSITIVE_REGULATION_OF_RELEASE_OF_CYTOCHROME_C_FROM_MITOCHONDRIA	GOBP_POSITIVE_REGULATION_OF_RELEASE_OF_CYTOCHROME_C_FROM_MITOCHONDRIA	1	-0.968707	-1.28191	0.0710059	0.78241	0.77078	25	tags=100%, list=3%, signal=97%
GOBP_REGULATION_OF_COMPLEMENT_ACTIVATION_ALTERNATIVE_PATHWAY	GOBP_REGULATION_OF_COMPLEMENT_ACTIVATION_ALTERNATIVE_PATHWAY	1	-0.967347	-1.28011	0.0710059	0.78241	0.77078	26	tags=100%, list=4%, signal=97%
GOBP_REGULATION_OF_EPITHELIAL_CELL_DIFFERENTIATION_INVOLVED_IN_KIDNEY_DEVELOPMENT	GOBP_REGULATION_OF_EPITHELIAL_CELL_DIFFERENTIATION_INVOLVED_IN_KIDNEY_DEVELOPMENT	1	-0.968707	-1.28191	0.0710059	0.78241	0.77078	25	tags=100%, list=3%, signal=97%
GOBP_REGULATION_OF_KERATINOCYTE_MIGRATION	GOBP_REGULATION_OF_KERATINOCYTE_MIGRATION	1	-0.968707	-1.28191	0.0710059	0.78241	0.77078	25	tags=100%, list=3%, signal=97%
WP_ANGIOGENESIS	WP_ANGIOGENESIS	1	-0.968707	-1.28191	0.0710059	0.78241	0.77078	25	tags=100%, list=3%, signal=97%
WP_KISSPEPTINKISSPEPTIN_RECEPTOR_SYSTEM_IN_THE_OVARY	WP_KISSPEPTINKISSPEPTIN_RECEPTOR_SYSTEM_IN_THE_OVARY	1	-0.968707	-1.28191	0.0710059	0.78241	0.77078	25	tags=100%, list=3%, signal=97%
WP_NEOVASCULARISATION_PROCESSES	WP_NEOVASCULARISATION_PROCESSES	1	-0.968707	-1.28191	0.0710059	0.78241	0.77078	25	tags=100%, list=3%, signal=97%
GOBP_REGULATION_OF_TRIGLYCERIDE_CATABOLIC_PROCESS	GOBP_REGULATION_OF_TRIGLYCERIDE_CATABOLIC_PROCESS	5	-0.814074	-1.37707	0.071066	0.78241	0.77078	42	tags=60%, list=6%, signal=57%	APOA4/APOC3/APOA5
HP_RECURRENT_RESPIRATORY_INFECTIONS	HP_RECURRENT_RESPIRATORY_INFECTIONS	33	-0.549156	-1.35928	0.071066	0.78241	0.77078	144	tags=30%, list=20%, signal=26%	NPM1/PRTN3/COL6A3/CORO1A/MYO5A/FBLN5/UGP2/ELANE/PSMB8/COL6A1
GOLDRATH_EFF_VS_MEMORY_CD8_TCELL_UP	GOLDRATH_EFF_VS_MEMORY_CD8_TCELL_UP	14	-0.658485	-1.39993	0.0715308	0.78241	0.77078	54	tags=29%, list=7%, signal=27%	TXN/LGALS1/PSMA5/S100A8
GSE11961_MEMORY_BCELL_DAY7_VS_GERMINAL_CENTER_BCELL_DAY40_UP	GSE11961_MEMORY_BCELL_DAY7_VS_GERMINAL_CENTER_BCELL_DAY40_UP	7	0.730713	1.46417	0.0716049	0.78241	0.77078	105	tags=57%, list=14%, signal=49%	SPARC/TNXB/MINPP1/ASS1
GSE13522_WT_VS_IFNAR_KO_SKIN_UP	GSE13522_WT_VS_IFNAR_KO_SKIN_UP	7	0.729101	1.46094	0.0716049	0.78241	0.77078	104	tags=71%, list=14%, signal=62%	IGLC7/RSU1/UPB1/PDIA6/ADH1C
HP_THROMBOEMBOLISM	HP_THROMBOEMBOLISM	7	0.728777	1.46029	0.0716049	0.78241	0.77078	2	tags=14%, list=0%, signal=14%	PRDX1
WHITEFORD_PEDIATRIC_CANCER_MARKERS	WHITEFORD_PEDIATRIC_CANCER_MARKERS	8	0.712803	1.46985	0.071618	0.78241	0.77078	152	tags=50%, list=21%, signal=40%	PSAT1/KPNA2/PON3/ENO1
BROWNE_HCMV_INFECTION_30MIN_UP	BROWNE_HCMV_INFECTION_30MIN_UP	9	-0.730892	-1.41031	0.0717629	0.78241	0.77078	101	tags=33%, list=14%, signal=29%	GPX3/LCN2/COL6A1
GOBP_REGULATION_OF_FATTY_ACID_METABOLIC_PROCESS	GOBP_REGULATION_OF_FATTY_ACID_METABOLIC_PROCESS	9	-0.731143	-1.41079	0.0717629	0.78241	0.77078	127	tags=44%, list=17%, signal=37%	FABP5/FABP3/FABP1/APOA5
GOBP_REGULATION_OF_VIRAL_LIFE_CYCLE	GOBP_REGULATION_OF_VIRAL_LIFE_CYCLE	9	-0.733745	-1.41581	0.0717629	0.78241	0.77078	60	tags=44%, list=8%, signal=41%	P4HB/LTF/LGALS1/PTX3
GSE11961_MARGINAL_ZONE_BCELL_VS_GERMINAL_CENTER_BCELL_DAY40_UP	GSE11961_MARGINAL_ZONE_BCELL_VS_GERMINAL_CENTER_BCELL_DAY40_UP	9	-0.732936	-1.41425	0.0717629	0.78241	0.77078	85	tags=67%, list=12%, signal=60%	RNASE4/PDLIM1/FSTL1/CTSD/ACAA2/NUCB1
GSE20198_IL12_VS_IFNA_TREATED_ACT_CD4_TCELL_DN	GSE20198_IL12_VS_IFNA_TREATED_ACT_CD4_TCELL_DN	9	-0.72994	-1.40847	0.0717629	0.78241	0.77078	103	tags=56%, list=14%, signal=48%	GOT2/TXN/ACAA2/NUP214/NUCB1
GSE21379_WT_VS_SAP_KO_TFH_CD4_TCELL_DN	GSE21379_WT_VS_SAP_KO_TFH_CD4_TCELL_DN	9	-0.73233	-1.41308	0.0717629	0.78241	0.77078	46	tags=33%, list=6%, signal=32%	VNN1/CD163/ICAM1
GSE27786_BCELL_VS_ERYTHROBLAST_UP	GSE27786_BCELL_VS_ERYTHROBLAST_UP	9	-0.729676	-1.40796	0.0717629	0.78241	0.77078	156	tags=67%, list=21%, signal=53%	YWHAB/PDLIM1/HNRNPA3/PSMB4/PSMA3/DAG1
RUTELLA_RESPONSE_TO_HGF_VS_CSF2RB_AND_IL4_UP	RUTELLA_RESPONSE_TO_HGF_VS_CSF2RB_AND_IL4_UP	47	-0.512501	-1.33107	0.0719512	0.78241	0.77078	179	tags=47%, list=24%, signal=38%	MDH1/GSR/PSMB5/NRP1/PTGDS/VNN1/CES1/FTH1/MT1X/TYMP/GOT2/CTSD/SPP1/ACAA2/NUP214/CD163/LTA4H/VSIG4/MMP9/AMY1A/CHI3L1/S100A9
GOCC_MICROVILLUS	GOCC_MICROVILLUS	9	0.685229	1.46838	0.0720222	0.78241	0.77078	176	tags=56%, list=24%, signal=43%	DCXR/MSN/FSCN1/CA2/ITGB3
GSE13229_MATURE_VS_INTMATURE_NKCELL_UP	GSE13229_MATURE_VS_INTMATURE_NKCELL_UP	9	0.682351	1.46221	0.0720222	0.78241	0.77078	118	tags=33%, list=16%, signal=28%	TUBA8/MUC16/PLXNC1
GOBP_REGULATION_OF_POSITIVE_CHEMOTAXIS	GOBP_REGULATION_OF_POSITIVE_CHEMOTAXIS	2	0.934605	1.33167	0.0722101	0.78241	0.77078	50	tags=100%, list=7%, signal=93%	CDH13/F7
GSE22432_MULTIPOTENT_PROGENITOR_VS_CDC_UP	GSE22432_MULTIPOTENT_PROGENITOR_VS_CDC_UP	2	0.936258	1.33403	0.0722101	0.78241	0.77078	31	tags=50%, list=4%, signal=48%	PEBP4
GSE7459_UNTREATED_VS_IL6_TREATED_ACT_CD4_TCELL_UP	GSE7459_UNTREATED_VS_IL6_TREATED_ACT_CD4_TCELL_UP	2	0.936032	1.33371	0.0722101	0.78241	0.77078	43	tags=50%, list=6%, signal=47%	CPA1
HP_MYOCARDIAL_FIBROSIS	HP_MYOCARDIAL_FIBROSIS	2	0.93596	1.33361	0.0722101	0.78241	0.77078	23	tags=50%, list=3%, signal=49%	SERPINE1
REACTOME_BMAL1_CLOCK_NPAS2_ACTIVATES_CIRCADIAN_GENE_EXPRESSION	REACTOME_BMAL1_CLOCK_NPAS2_ACTIVATES_CIRCADIAN_GENE_EXPRESSION	2	0.934605	1.33167	0.0722101	0.78241	0.77078	50	tags=100%, list=7%, signal=93%	SERPINE1/F7
WU_HBX_TARGETS_1_DN	WU_HBX_TARGETS_1_DN	2	0.933647	1.33031	0.0722101	0.78241	0.77078	46	tags=50%, list=6%, signal=47%	YWHAE
WU_HBX_TARGETS_2_UP	WU_HBX_TARGETS_2_UP	2	0.933647	1.33031	0.0722101	0.78241	0.77078	46	tags=50%, list=6%, signal=47%	YWHAE
GOCC_VACUOLAR_LUMEN	GOCC_VACUOLAR_LUMEN	33	-0.547374	-1.35487	0.072335	0.78241	0.77078	134	tags=33%, list=18%, signal=29%	VCAN/PRTN3/DEFA3/ACTR2/CTSD/SDC1/OGN/GDI2/FTL/MPO/ELANE
FOURNIER_ACINAR_DEVELOPMENT_LATE_2	FOURNIER_ACINAR_DEVELOPMENT_LATE_2	22	0.509392	1.41359	0.0723893	0.78241	0.77078	33	tags=18%, list=4%, signal=18%	PRDX1/YWHAH/ARHGDIA/CCT2
HP_ABNORMAL_ABDOMEN_MORPHOLOGY	HP_ABNORMAL_ABDOMEN_MORPHOLOGY	53	-0.499997	-1.32157	0.0724638	0.78241	0.77078	152	tags=30%, list=21%, signal=26%	SLC4A1/SAA1/NPM1/GBE1/ASL/PYGL/GPI/TKT/PSMB4/PKLR/BPGM/SPTB/PSMB9/SPP1/PRKCSH/PSMB8
GSE17721_POLYIC_VS_CPG_24H_BMDC_UP	GSE17721_POLYIC_VS_CPG_24H_BMDC_UP	6	-0.783304	-1.3791	0.0729685	0.78241	0.77078	15	tags=50%, list=2%, signal=49%	FABP3/ELANE/S100A9
GSE9316_CD4_TCELL_BALBC_VS_TH17_ENRI_CD4_TCELL_SKG_PMA_IONO_STIM_FR4NEG_UP	GSE9316_CD4_TCELL_BALBC_VS_TH17_ENRI_CD4_TCELL_SKG_PMA_IONO_STIM_FR4NEG_UP	6	-0.782908	-1.3784	0.0729685	0.78241	0.77078	38	tags=50%, list=5%, signal=48%	SOD2/PTGR1/TSKU
BYSTRYKH_SCP2_QTL	BYSTRYKH_SCP2_QTL	1	-0.965986	-1.27831	0.0729783	0.78241	0.77078	27	tags=100%, list=4%, signal=96%
GOERING_BLOOD_HDL_CHOLESTEROL_QTL_TRANS	GOERING_BLOOD_HDL_CHOLESTEROL_QTL_TRANS	1	-0.965986	-1.27831	0.0729783	0.78241	0.77078	27	tags=100%, list=4%, signal=96%
GRAHAM_CML_QUIESCENT_VS_CML_DIVIDING_DN	GRAHAM_CML_QUIESCENT_VS_CML_DIVIDING_DN	1	-0.965986	-1.27831	0.0729783	0.78241	0.77078	27	tags=100%, list=4%, signal=96%
GRAHAM_CML_QUIESCENT_VS_NORMAL_DIVIDING_DN	GRAHAM_CML_QUIESCENT_VS_NORMAL_DIVIDING_DN	1	-0.965986	-1.27831	0.0729783	0.78241	0.77078	27	tags=100%, list=4%, signal=96%
PID_IL23_PATHWAY	PID_IL23_PATHWAY	1	-0.965986	-1.27831	0.0729783	0.78241	0.77078	27	tags=100%, list=4%, signal=96%
REACTOME_ROS_AND_RNS_PRODUCTION_IN_PHAGOCYTES	REACTOME_ROS_AND_RNS_PRODUCTION_IN_PHAGOCYTES	1	-0.965986	-1.27831	0.0729783	0.78241	0.77078	27	tags=100%, list=4%, signal=96%
WP_BENZENE_METABOLISM	WP_BENZENE_METABOLISM	1	-0.965986	-1.27831	0.0729783	0.78241	0.77078	27	tags=100%, list=4%, signal=96%
NAKAMURA_ADIPOGENESIS_LATE_DN	NAKAMURA_ADIPOGENESIS_LATE_DN	5	0.812585	1.46773	0.0729927	0.78241	0.77078	142	tags=100%, list=19%, signal=81%	CALD1/SERPINE1/ACTG2/POSTN/TPM1
GSE2405_0H_VS_1.5H_A_PHAGOCYTOPHILUM_STIM_NEUTROPHIL_UP	GSE2405_0H_VS_1.5H_A_PHAGOCYTOPHILUM_STIM_NEUTROPHIL_UP	25	-0.575312	-1.36166	0.0731071	0.78241	0.77078	93	tags=32%, list=13%, signal=29%	PSMB3/PSMB4/LAP3/HINT1/SNCA/PSMB9/SERPINB1/S100A9
REACTOME_REGULATION_OF_EXPRESSION_OF_SLITS_AND_ROBOS	REACTOME_REGULATION_OF_EXPRESSION_OF_SLITS_AND_ROBOS	25	-0.574983	-1.36088	0.0731071	0.78241	0.77078	129	tags=48%, list=18%, signal=41%	PSMB3/PSMA2/PSMA4/RPS2/PSMB4/PSMB9/PSMA1/PSMA3/DAG1/PSMA5/PSMA7/PSMB8
GOBP_REGULATION_OF_ORGAN_GROWTH	GOBP_REGULATION_OF_ORGAN_GROWTH	4	0.855374	1.42728	0.0731707	0.78241	0.77078	68	tags=50%, list=9%, signal=46%	PI16/IGF2
HP_ABNORMALITY_OF_THE_EXTRINSIC_PATHWAY	HP_ABNORMALITY_OF_THE_EXTRINSIC_PATHWAY	4	0.855161	1.42692	0.0731707	0.78241	0.77078	59	tags=50%, list=8%, signal=46%	F7/PGM1
HP_ABNORMALITY_OF_THE_SUPRAORBITAL_RIDGES	HP_ABNORMALITY_OF_THE_SUPRAORBITAL_RIDGES	4	0.855603	1.42766	0.0731707	0.78241	0.77078	24	tags=25%, list=3%, signal=24%	FHL1
GSE26030_UNSTIM_VS_RESTIM_TH17_DAY5_POST_POLARIZATION_UP	GSE26030_UNSTIM_VS_RESTIM_TH17_DAY5_POST_POLARIZATION_UP	10	0.679744	1.4902	0.0733938	0.78241	0.77078	160	tags=50%, list=22%, signal=40%	CKB/ECI1/PON3/PEPD/SH3BGRL3
BRUINS_UVC_RESPONSE_VIA_TP53_GROUP_C	BRUINS_UVC_RESPONSE_VIA_TP53_GROUP_C	2	-0.922691	-1.28228	0.0733945	0.78241	0.77078	43	tags=100%, list=6%, signal=94%	IL1RL1
GOCC_COSTAMERE	GOCC_COSTAMERE	2	-0.923345	-1.28319	0.0733945	0.78241	0.77078	35	tags=100%, list=5%, signal=96%	DAG1
GOMF_DYSTROGLYCAN_BINDING	GOMF_DYSTROGLYCAN_BINDING	2	-0.923345	-1.28319	0.0733945	0.78241	0.77078	35	tags=100%, list=5%, signal=96%	DAG1
GOMF_CHOLESTEROL_BINDING	GOMF_CHOLESTEROL_BINDING	8	-0.748046	-1.40842	0.0736	0.78241	0.77078	42	tags=25%, list=6%, signal=24%	CETP/APOA5
GOMF_STEROL_BINDING	GOMF_STEROL_BINDING	8	-0.748046	-1.40842	0.0736	0.78241	0.77078	42	tags=25%, list=6%, signal=24%	CETP/APOA5
GSE41867_NAIVE_VS_DAY8_LCMV_ARMSTRONG_EFFECTOR_CD8_TCELL_DN	GSE41867_NAIVE_VS_DAY8_LCMV_ARMSTRONG_EFFECTOR_CD8_TCELL_DN	8	-0.74803	-1.40839	0.0736	0.78241	0.77078	33	tags=50%, list=4%, signal=48%	ANK1/FCGR2A/CD93/MRC1
HP_ABNORMAL_PHALANGEAL_JOINT_MORPHOLOGY_OF_THE_HAND	HP_ABNORMAL_PHALANGEAL_JOINT_MORPHOLOGY_OF_THE_HAND	8	-0.749128	-1.41046	0.0736	0.78241	0.77078	108	tags=50%, list=15%, signal=43%	COL6A3/HINT1/PSMB8/COL6A1
LEE_LIVER_CANCER_CIPROFIBRATE_UP	LEE_LIVER_CANCER_CIPROFIBRATE_UP	8	-0.749203	-1.4106	0.0736	0.78241	0.77078	154	tags=62%, list=21%, signal=50%	VNN1/LCN2/IGFBP2/IGFBP1/S100A9
KUMAR_TARGETS_OF_MLL_AF9_FUSION	KUMAR_TARGETS_OF_MLL_AF9_FUSION	35	-0.548195	-1.36821	0.0736041	0.78241	0.77078	60	tags=20%, list=8%, signal=19%	LTF/SPP1/TXN/IL1RL1/MMP9/PRG2/MRC1
GSE29618_PRE_VS_DAY7_POST_TIV_FLU_VACCINE_PDC_UP	GSE29618_PRE_VS_DAY7_POST_TIV_FLU_VACCINE_PDC_UP	10	-0.711783	-1.41008	0.0736842	0.78241	0.77078	101	tags=30%, list=14%, signal=26%	LCN2/DHX9/PLA2G2A
HOEK_B_CELL_2011_2012_TIV_ADULT_7DY_UP	HOEK_B_CELL_2011_2012_TIV_ADULT_7DY_UP	7	-0.765975	-1.37963	0.0737018	0.78241	0.77078	98	tags=43%, list=13%, signal=38%	IGKV3-7/SDC1/S100A9
RASHI_RESPONSE_TO_IONIZING_RADIATION_6	RASHI_RESPONSE_TO_IONIZING_RADIATION_6	17	-0.644539	-1.41133	0.0737135	0.78241	0.77078	59	tags=18%, list=8%, signal=17%	PSMB9/S100A8/S100A9
GSE36888_UNTREATED_VS_IL2_TREATED_STAT5_AB_KNOCKIN_TCELL_2H_UP	GSE36888_UNTREATED_VS_IL2_TREATED_STAT5_AB_KNOCKIN_TCELL_2H_UP	20	-0.607596	-1.38229	0.0737265	0.78241	0.77078	189	tags=45%, list=26%, signal=34%	SOD2/PSMA6/NRP1/FTH1/CLIC1/TXN/PSMA3/ICAM1/S100A9
GSE24634_TEFF_VS_TCONV_DAY3_IN_CULTURE_DN	GSE24634_TEFF_VS_TCONV_DAY3_IN_CULTURE_DN	22	-0.597118	-1.38312	0.0737813	0.78241	0.77078	118	tags=32%, list=16%, signal=28%	NRP1/PYGL/TYMP/SNCA/CD163/VSIG4/S100A8
GOBP_REGULATION_OF_HYDROLASE_ACTIVITY	GOBP_REGULATION_OF_HYDROLASE_ACTIVITY	104	-0.443492	-1.27986	0.0737885	0.78241	0.77078	109	tags=19%, list=15%, signal=19%	PEBP1/COL6A3/WFDC2/FABP1/SNCA/CTSD/LTF/PSMB9/DHX9/GDI2/APOA5/PSMA3/ICAM1/MMP9/PTX3/TIMP1/S100A8/PSMB8/SERPINB1/S100A9
HP_ABNORMAL_SUBARACHNOID_SPACE_MORPHOLOGY	HP_ABNORMAL_SUBARACHNOID_SPACE_MORPHOLOGY	8	0.710899	1.46592	0.0742706	0.78241	0.77078	91	tags=38%, list=12%, signal=33%	RAB11A/AIFM1/CLTC
GOMF_TRANSFORMING_GROWTH_FACTOR_BETA_BINDING	GOMF_TRANSFORMING_GROWTH_FACTOR_BETA_BINDING	4	-0.836623	-1.34619	0.0743243	0.78241	0.77078	17	tags=50%, list=2%, signal=49%	VASN/TSKU
FLETCHER_PBMC_BCG_10W_INFANT_BCG_STIMULATED_VS_UNSTIMULATED_10W_DN	FLETCHER_PBMC_BCG_10W_INFANT_BCG_STIMULATED_VS_UNSTIMULATED_10W_DN	27	-0.578006	-1.37749	0.0743692	0.78241	0.77078	89	tags=26%, list=12%, signal=24%	CSF1R/CTSD/SPP1/PTGR1/FTL/LGALS1/MMP9
GSE19198_1H_VS_6H_IL21_TREATED_TCELL_DN	GSE19198_1H_VS_6H_IL21_TREATED_TCELL_DN	14	-0.658149	-1.39922	0.074392	0.78241	0.77078	59	tags=29%, list=8%, signal=27%	PSMB9/TXN/TIMP1/PSMB8
GSE360_L_DONOVANI_VS_L_MAJOR_DC_DN	GSE360_L_DONOVANI_VS_L_MAJOR_DC_DN	14	-0.657305	-1.39742	0.074392	0.78241	0.77078	84	tags=36%, list=11%, signal=32%	SLC4A1/CLIC1/UGP2/VSIG4/S100A8
GSE18804_SPLEEN_MACROPHAGE_VS_COLON_TUMORAL_MACROPHAGE_DN	GSE18804_SPLEEN_MACROPHAGE_VS_COLON_TUMORAL_MACROPHAGE_DN	11	0.657999	1.47377	0.0744048	0.78241	0.77078	154	tags=64%, list=21%, signal=51%	YWHAE/AK1/AIFM1/PGM1/ENO3/ECI1/ALDH1L1
LINDGREN_BLADDER_CANCER_CLUSTER_1_DN	LINDGREN_BLADDER_CANCER_CLUSTER_1_DN	25	-0.57283	-1.35579	0.0744125	0.78241	0.77078	142	tags=48%, list=19%, signal=40%	P4HB/COL18A1/PAPPA/FABP3/PSMB4/BPGM/TNC/PSMA1/MCAM/DAG1/LGALS1/PRG2
GOBP_MYELOID_LEUKOCYTE_DIFFERENTIATION	GOBP_MYELOID_LEUKOCYTE_DIFFERENTIATION	12	-0.678352	-1.40205	0.0744526	0.78241	0.77078	134	tags=33%, list=18%, signal=28%	PRTN3/CSF1R/LTF/MMP9
GOBP_TRIGLYCERIDE_CATABOLIC_PROCESS	GOBP_TRIGLYCERIDE_CATABOLIC_PROCESS	12	-0.678098	-1.40153	0.0744526	0.78241	0.77078	141	tags=50%, list=19%, signal=41%	FABP4/LIPC/CPS1/FABP3/FABP1/APOA5
GSE41867_DAY6_EFFECTOR_VS_DAY30_MEMORY_CD8_TCELL_LCMV_ARMSTRONG_UP	GSE41867_DAY6_EFFECTOR_VS_DAY30_MEMORY_CD8_TCELL_LCMV_ARMSTRONG_UP	6	-0.781713	-1.37629	0.0746269	0.78241	0.77078	59	tags=50%, list=8%, signal=46%	CAPN1/PSMB9/LGALS1
GOBP_MYOBLAST_DIFFERENTIATION	GOBP_MYOBLAST_DIFFERENTIATION	3	-0.885917	-1.32228	0.0747331	0.78241	0.77078	65	tags=67%, list=9%, signal=61%	SDC1/LGALS1
HAN_JNK_SINGALING_UP	HAN_JNK_SINGALING_UP	3	-0.886509	-1.32316	0.0747331	0.78241	0.77078	67	tags=100%, list=9%, signal=91%	TNC/IL1RL1
GOMF_TROPOMYOSIN_BINDING	GOMF_TROPOMYOSIN_BINDING	1	0.971429	1.28187	0.0747475	0.78241	0.77078	22	tags=100%, list=3%, signal=97%	CALD1
REICHERT_MITOSIS_LIN9_TARGETS	REICHERT_MITOSIS_LIN9_TARGETS	1	0.971429	1.28187	0.0747475	0.78241	0.77078	22	tags=100%, list=3%, signal=97%	CALD1
WHITFIELD_CELL_CYCLE_S	WHITFIELD_CELL_CYCLE_S	1	0.971429	1.28187	0.0747475	0.78241	0.77078	22	tags=100%, list=3%, signal=97%	CALD1
REACTOME_VEGFR2_MEDIATED_VASCULAR_PERMEABILITY	REACTOME_VEGFR2_MEDIATED_VASCULAR_PERMEABILITY	3	0.891319	1.39333	0.0748299	0.78241	0.77078	47	tags=33%, list=6%, signal=31%	RAC1
SOBOLEV_PBMC_PANDEMRIX_AGE_18_64YO_CORRELATED_WITH_AGE_1DY_POSITIVE	SOBOLEV_PBMC_PANDEMRIX_AGE_18_64YO_CORRELATED_WITH_AGE_1DY_POSITIVE	3	0.892288	1.39485	0.0748299	0.78241	0.77078	49	tags=67%, list=7%, signal=62%	EEF2/AK1
YAO_TEMPORAL_RESPONSE_TO_PROGESTERONE_CLUSTER_15	YAO_TEMPORAL_RESPONSE_TO_PROGESTERONE_CLUSTER_15	3	0.890506	1.39206	0.0748299	0.78241	0.77078	1	tags=33%, list=0%, signal=33%	CD59
GOBP_ION_HOMEOSTASIS	GOBP_ION_HOMEOSTASIS	36	-0.542491	-1.35969	0.0748731	0.78241	0.77078	152	tags=39%, list=21%, signal=32%	SLC4A1/SAA1/CPS1/FTH1/MT1X/LCN2/CORO1A/SNCA/REG1A/LTF/FTL/S100A8/ELANE/S100A9
BIOCARTA_BLYMPHOCYTE_PATHWAY	BIOCARTA_BLYMPHOCYTE_PATHWAY	1	-0.964626	-1.2765	0.0749507	0.78241	0.77078	28	tags=100%, list=4%, signal=96%
BIOCARTA_TCYTOTOXIC_PATHWAY	BIOCARTA_TCYTOTOXIC_PATHWAY	1	-0.964626	-1.2765	0.0749507	0.78241	0.77078	28	tags=100%, list=4%, signal=96%
BIOCARTA_THELPER_PATHWAY	BIOCARTA_THELPER_PATHWAY	1	-0.964626	-1.2765	0.0749507	0.78241	0.77078	28	tags=100%, list=4%, signal=96%
GOBP_CELLULAR_RESPONSE_TO_ALKALOID	GOBP_CELLULAR_RESPONSE_TO_ALKALOID	1	-0.964626	-1.2765	0.0749507	0.78241	0.77078	28	tags=100%, list=4%, signal=96%
GOBP_ESTABLISHMENT_OF_ENDOTHELIAL_INTESTINAL_BARRIER	GOBP_ESTABLISHMENT_OF_ENDOTHELIAL_INTESTINAL_BARRIER	1	-0.964626	-1.2765	0.0749507	0.78241	0.77078	28	tags=100%, list=4%, signal=96%
GOBP_POSITIVE_REGULATION_OF_CELLULAR_EXTRAVASATION	GOBP_POSITIVE_REGULATION_OF_CELLULAR_EXTRAVASATION	1	-0.964626	-1.2765	0.0749507	0.78241	0.77078	28	tags=100%, list=4%, signal=96%
GOBP_RECEPTOR_MEDIATED_VIRION_ATTACHMENT_TO_HOST_CELL	GOBP_RECEPTOR_MEDIATED_VIRION_ATTACHMENT_TO_HOST_CELL	1	-0.964626	-1.2765	0.0749507	0.78241	0.77078	28	tags=100%, list=4%, signal=96%
GOBP_T_CELL_ACTIVATION_VIA_T_CELL_RECEPTOR_CONTACT_WITH_ANTIGEN_BOUND_TO_MHC_MOLECULE_ON_ANTIGEN_PRESENTING_CELL	GOBP_T_CELL_ACTIVATION_VIA_T_CELL_RECEPTOR_CONTACT_WITH_ANTIGEN_BOUND_TO_MHC_MOLECULE_ON_ANTIGEN_PRESENTING_CELL	1	-0.964626	-1.2765	0.0749507	0.78241	0.77078	28	tags=100%, list=4%, signal=96%
GOBP_T_CELL_ANTIGEN_PROCESSING_AND_PRESENTATION	GOBP_T_CELL_ANTIGEN_PROCESSING_AND_PRESENTATION	1	-0.964626	-1.2765	0.0749507	0.78241	0.77078	28	tags=100%, list=4%, signal=96%
GOBP_T_CELL_EXTRAVASATION	GOBP_T_CELL_EXTRAVASATION	1	-0.964626	-1.2765	0.0749507	0.78241	0.77078	28	tags=100%, list=4%, signal=96%
MOREIRA_RESPONSE_TO_TSA_DN	MOREIRA_RESPONSE_TO_TSA_DN	1	-0.964626	-1.2765	0.0749507	0.78241	0.77078	28	tags=100%, list=4%, signal=96%
NAKAYA_PBMC_FLUMIST_AGE_18_50YO_7DY_IFN_SUBSET_DN	NAKAYA_PBMC_FLUMIST_AGE_18_50YO_7DY_IFN_SUBSET_DN	1	-0.964626	-1.2765	0.0749507	0.78241	0.77078	28	tags=100%, list=4%, signal=96%
NICK_RESPONSE_TO_PROC_TREATMENT_DN	NICK_RESPONSE_TO_PROC_TREATMENT_DN	1	-0.964626	-1.2765	0.0749507	0.78241	0.77078	28	tags=100%, list=4%, signal=96%
SHIN_B_CELL_LYMPHOMA_CLUSTER_8	SHIN_B_CELL_LYMPHOMA_CLUSTER_8	1	-0.964626	-1.2765	0.0749507	0.78241	0.77078	28	tags=100%, list=4%, signal=96%
GOBP_ANTIGEN_PROCESSING_AND_PRESENTATION_OF_PEPTIDE_ANTIGEN_VIA_MHC_CLASS_I	GOBP_ANTIGEN_PROCESSING_AND_PRESENTATION_OF_PEPTIDE_ANTIGEN_VIA_MHC_CLASS_I	20	-0.606374	-1.37951	0.075067	0.78241	0.77078	129	tags=50%, list=18%, signal=42%	PSMB3/PSMA2/PSMA4/PSMB4/PSMB9/PSMA1/PSMA3/PSMA5/PSMA7/PSMB8
GSE37301_HEMATOPOIETIC_STEM_CELL_VS_CD4_TCELL_UP	GSE37301_HEMATOPOIETIC_STEM_CELL_VS_CD4_TCELL_UP	20	-0.604985	-1.37635	0.075067	0.78241	0.77078	118	tags=35%, list=16%, signal=30%	PYGL/LCN2/CSF1R/MYO5A/LTF/MMP9/S100A9
HP_ABNORMAL_LYMPHOCYTE_PHYSIOLOGY	HP_ABNORMAL_LYMPHOCYTE_PHYSIOLOGY	20	-0.606127	-1.37895	0.075067	0.78241	0.77078	93	tags=40%, list=13%, signal=36%	MTHFD1/HYOU1/KRT1/PSMB4/PSMB9/ELANE/KRT9/PSMB8
GAURNIER_PSMD4_TARGETS	GAURNIER_PSMD4_TARGETS	6	0.784958	1.48643	0.075188	0.78241	0.77078	10	tags=17%, list=1%, signal=17%	HLA-C
GSE22886_DAY0_VS_DAY7_MONOCYTE_IN_CULTURE_UP	GSE22886_DAY0_VS_DAY7_MONOCYTE_IN_CULTURE_UP	10	-0.711394	-1.40931	0.075188	0.78241	0.77078	33	tags=30%, list=4%, signal=29%	FCGR2A/CD93/S100A9
GSE23321_CENTRAL_MEMORY_VS_NAIVE_CD8_TCELL_DN	GSE23321_CENTRAL_MEMORY_VS_NAIVE_CD8_TCELL_DN	10	-0.710753	-1.40804	0.075188	0.78241	0.77078	170	tags=50%, list=23%, signal=39%	ADAM12/FABP3/REG3A/TYMP/ELANE
GSE40274_CTRL_VS_GATA1_TRANSDUCED_ACTIVATED_CD4_TCELL_UP	GSE40274_CTRL_VS_GATA1_TRANSDUCED_ACTIVATED_CD4_TCELL_UP	10	-0.710236	-1.40702	0.075188	0.78241	0.77078	47	tags=30%, list=6%, signal=28%	GDI2/MMP9/S100A8
GSE14000_TRANSLATED_RNA_VS_MRNA_DC_DN	GSE14000_TRANSLATED_RNA_VS_MRNA_DC_DN	7	0.770689	1.54427	0.0753585	0.78241	0.77078	86	tags=43%, list=12%, signal=38%	RPLP2/RPS6/RPS12
GSE34156_TLR1_TLR2_LIGAND_VS_NOD2_AND_TLR1_TLR2_LIGAND_6H_TREATED_MONOCYTE_DN	GSE34156_TLR1_TLR2_LIGAND_VS_NOD2_AND_TLR1_TLR2_LIGAND_6H_TREATED_MONOCYTE_DN	7	-0.765056	-1.37797	0.0753769	0.78241	0.77078	143	tags=43%, list=19%, signal=35%	PDLIM1/KRT85/KRT9
MARTORIATI_MDM4_TARGETS_NEUROEPITHELIUM_DN	MARTORIATI_MDM4_TARGETS_NEUROEPITHELIUM_DN	7	-0.765075	-1.37801	0.0753769	0.78241	0.77078	90	tags=43%, list=12%, signal=38%	CORO1A/CSF1R/MRC1
GOBP_EXOCYTOSIS	GOBP_EXOCYTOSIS	149	-0.415302	-1.2356	0.0754516	0.78241	0.77078	157	tags=24%, list=21%, signal=24%	PTGDS/VNN1/HSPA1B/HSP90AB1/MMRN1/PRTN3/KRT1/PSMA2/FTH1/PYGL/SRGN/GPI/LCN2/ACTR2/CORO1A/SNCA/CTSD/SDC1/CHGA/LTF/GDI2/FTL/CD93/LTA4H/MPO/MMP9/PRG2/PTX3/TIMP1/PSMA5/S100A8/ELANE/B4GALT1/SERPINB1/CHI3L1/S100A9
GSE17301_CTRL_VS_48H_ACD3_ACD28_IFNA5_STIM_CD8_TCELL_UP	GSE17301_CTRL_VS_48H_ACD3_ACD28_IFNA5_STIM_CD8_TCELL_UP	4	0.852689	1.4228	0.0756098	0.78241	0.77078	35	tags=25%, list=5%, signal=24%	CKB
GSE3982_DC_VS_EFF_MEMORY_CD4_TCELL_UP	GSE3982_DC_VS_EFF_MEMORY_CD4_TCELL_UP	14	-0.656136	-1.39494	0.0758226	0.78241	0.77078	30	tags=43%, list=4%, signal=42%	CAT/SERPINA1/CST3/NRP1/UGP2/MRC1
GOCC_INTERMEDIATE_FILAMENT_CYTOSKELETON	GOCC_INTERMEDIATE_FILAMENT_CYTOSKELETON	12	-0.675044	-1.39522	0.0759124	0.78241	0.77078	137	tags=83%, list=19%, signal=69%	KRT2/KRT33B/KRT75/KRT16/KRT1/KRT85/KRT86/KRT31/S100A8/KRT9
GSE13484_UNSTIM_VS_YF17D_VACCINE_STIM_PBMC_DN	GSE13484_UNSTIM_VS_YF17D_VACCINE_STIM_PBMC_DN	12	-0.677241	-1.39976	0.0759124	0.78241	0.77078	135	tags=67%, list=18%, signal=55%	ENPP2/CES1/MT1X/PSMA4/LAP3/PSMB9/SPP1/PSMB8
GOBP_NEGATIVE_REGULATION_OF_ION_TRANSPORT	GOBP_NEGATIVE_REGULATION_OF_ION_TRANSPORT	18	-0.629033	-1.38876	0.0761773	0.78241	0.77078	76	tags=28%, list=10%, signal=26%	SNCA/CHGA/TXN/ICAM1/MMP9
VERHAAK_AML_WITH_NPM1_MUTATED_DN	VERHAAK_AML_WITH_NPM1_MUTATED_DN	24	-0.584842	-1.37774	0.076326	0.78241	0.77078	134	tags=46%, list=18%, signal=39%	PRTN3/KRT1/NCAM1/LCN2/SNCA/BPGM/LTF/MPO/MMP9/ELANE/CHI3L1
TONKS_TARGETS_OF_RUNX1_RUNX1T1_FUSION_HSC_DN	TONKS_TARGETS_OF_RUNX1_RUNX1T1_FUSION_HSC_DN	20	-0.604041	-1.3742	0.0764075	0.78241	0.77078	176	tags=40%, list=24%, signal=31%	BIN2/GSR/IGFBP4/PDLIM1/IGFBP2/LGALS1/PRG2/S100A9
GSE22886_NAIVE_BCELL_VS_NEUTROPHIL_DN	GSE22886_NAIVE_BCELL_VS_NEUTROPHIL_DN	22	-0.592281	-1.37191	0.0764163	0.78241	0.77078	189	tags=41%, list=26%, signal=31%	SOD2/BIN2/VASP/PYGL/SRGN/TXN/NUP214/S100A8/S100A9
CHIARADONNA_NEOPLASTIC_TRANSFORMATION_KRAS_CDC25_DN	CHIARADONNA_NEOPLASTIC_TRANSFORMATION_KRAS_CDC25_DN	9	-0.721441	-1.39207	0.0764431	0.78241	0.77078	67	tags=56%, list=9%, signal=51%	NID1/RNASE4/TNC/IL1RL1/PTX3
GOBP_ORGANIC_ANION_TRANSPORT	GOBP_ORGANIC_ANION_TRANSPORT	9	-0.723091	-1.39525	0.0764431	0.78241	0.77078	152	tags=44%, list=21%, signal=36%	SLC4A1/CES1/PLA2G2A/CA3
GSE43863_NAIVE_VS_LY6C_LOW_CXCR5NEG_CD4_EFF_TCELL_D6_LCMV_DN	GSE43863_NAIVE_VS_LY6C_LOW_CXCR5NEG_CD4_EFF_TCELL_D6_LCMV_DN	9	-0.721542	-1.39227	0.0764431	0.78241	0.77078	74	tags=56%, list=10%, signal=51%	PSMB5/CTSD/NUP214/CD163/LGALS1
GSE29618_PRE_VS_DAY7_POST_LAIV_FLU_VACCINE_MDC_UP	GSE29618_PRE_VS_DAY7_POST_LAIV_FLU_VACCINE_MDC_UP	11	-0.690177	-1.38784	0.0764618	0.78241	0.77078	195	tags=64%, list=26%, signal=47%	GPD1/HYOU1/ADAM12/NRP1/ENPP2/GBE1/KRT86
GOBP_NEGATIVE_REGULATION_OF_PLATELET_DERIVED_GROWTH_FACTOR_RECEPTOR_SIGNALING_PATHWAY	GOBP_NEGATIVE_REGULATION_OF_PLATELET_DERIVED_GROWTH_FACTOR_RECEPTOR_SIGNALING_PATHWAY	3	-0.885238	-1.32126	0.0765125	0.78241	0.77078	76	tags=67%, list=10%, signal=60%	ADIPOQ/SNCA
HP_THICK_LOWER_LIP_VERMILION	HP_THICK_LOWER_LIP_VERMILION	3	-0.884952	-1.32084	0.0765125	0.78241	0.77078	9	tags=67%, list=1%, signal=66%	UGDH/PSMB8
WP_METHIONINE_DE_NOVO_AND_SALVAGE_PATHWAY	WP_METHIONINE_DE_NOVO_AND_SALVAGE_PATHWAY	3	-0.884414	-1.32003	0.0765125	0.78241	0.77078	56	tags=100%, list=8%, signal=93%	BHMT/TXN
BLANCO_MELO_SARS_COV_1_INFECTION_MCR5_CELLS_DN	BLANCO_MELO_SARS_COV_1_INFECTION_MCR5_CELLS_DN	2	0.930398	1.32568	0.0765864	0.78241	0.77078	29	tags=50%, list=4%, signal=48%	ADH1B
GOBP_NEGATIVE_REGULATION_OF_CARDIAC_MUSCLE_TISSUE_GROWTH	GOBP_NEGATIVE_REGULATION_OF_CARDIAC_MUSCLE_TISSUE_GROWTH	2	0.93157	1.32735	0.0765864	0.78241	0.77078	7	tags=50%, list=1%, signal=50%	PI16
GOBP_NEGATIVE_REGULATION_OF_MONOCYTE_CHEMOTACTIC_PROTEIN_1_PRODUCTION	GOBP_NEGATIVE_REGULATION_OF_MONOCYTE_CHEMOTACTIC_PROTEIN_1_PRODUCTION	2	0.929336	1.32417	0.0765864	0.78241	0.77078	48	tags=50%, list=7%, signal=47%	GSTP1
GOBP_NEGATIVE_REGULATION_OF_ORGAN_GROWTH	GOBP_NEGATIVE_REGULATION_OF_ORGAN_GROWTH	2	0.93157	1.32735	0.0765864	0.78241	0.77078	7	tags=50%, list=1%, signal=50%	PI16
GOBP_POSITIVE_REGULATION_OF_MONONUCLEAR_CELL_MIGRATION	GOBP_POSITIVE_REGULATION_OF_MONONUCLEAR_CELL_MIGRATION	2	0.929701	1.32469	0.0765864	0.78241	0.77078	23	tags=50%, list=3%, signal=49%	SERPINE1
GOBP_REGULATION_OF_HEART_GROWTH	GOBP_REGULATION_OF_HEART_GROWTH	2	0.93157	1.32735	0.0765864	0.78241	0.77078	7	tags=50%, list=1%, signal=50%	PI16
GOBP_SKELETAL_MUSCLE_CELL_DIFFERENTIATION	GOBP_SKELETAL_MUSCLE_CELL_DIFFERENTIATION	2	0.931113	1.3267	0.0765864	0.78241	0.77078	44	tags=50%, list=6%, signal=47%	EEF2
GRABARCZYK_BCL11B_TARGETS_DN	GRABARCZYK_BCL11B_TARGETS_DN	2	0.931288	1.32695	0.0765864	0.78241	0.77078	19	tags=50%, list=3%, signal=49%	PRSS2
HP_BROAD_PALM	HP_BROAD_PALM	2	0.929155	1.32391	0.0765864	0.78241	0.77078	54	tags=100%, list=7%, signal=93%	FHL1/AIFM1
HP_INCREASED_CONNECTIVE_TISSUE	HP_INCREASED_CONNECTIVE_TISSUE	2	0.929155	1.32391	0.0765864	0.78241	0.77078	54	tags=100%, list=7%, signal=93%	TNXB/AIFM1
SCHUHMACHER_MYC_TARGETS_DN	SCHUHMACHER_MYC_TARGETS_DN	2	0.931728	1.32758	0.0765864	0.78241	0.77078	15	tags=50%, list=2%, signal=49%	ILK
WP_AMPACTIVATED_PROTEIN_KINASE_AMPK_SIGNALING	WP_AMPACTIVATED_PROTEIN_KINASE_AMPK_SIGNALING	2	0.931868	1.32777	0.0765864	0.78241	0.77078	44	tags=50%, list=6%, signal=47%	EEF2
GOBP_ANTIGEN_PROCESSING_AND_PRESENTATION_OF_EXOGENOUS_PEPTIDE_ANTIGEN_VIA_MHC_CLASS_I	GOBP_ANTIGEN_PROCESSING_AND_PRESENTATION_OF_EXOGENOUS_PEPTIDE_ANTIGEN_VIA_MHC_CLASS_I	19	-0.612024	-1.36904	0.0766074	0.78241	0.77078	129	tags=53%, list=18%, signal=45%	PSMB3/PSMA2/PSMA4/PSMB4/PSMB9/PSMA1/PSMA3/PSMA5/PSMA7/PSMB8
HP_INTRAMUSCULAR_HEMATOMA	HP_INTRAMUSCULAR_HEMATOMA	7	0.767198	1.53728	0.0768507	0.78241	0.77078	50	tags=29%, list=7%, signal=27%	SERPINE1/F7
BIOCARTA_AMI_PATHWAY	BIOCARTA_AMI_PATHWAY	10	0.677027	1.48425	0.0769231	0.78241	0.77078	50	tags=10%, list=7%, signal=9%	F7
GOBP_ARACHIDONIC_ACID_SECRETION	GOBP_ARACHIDONIC_ACID_SECRETION	1	-0.963265	-1.2747	0.0769231	0.78241	0.77078	29	tags=100%, list=4%, signal=96%
GOBP_ICOSANOID_SECRETION	GOBP_ICOSANOID_SECRETION	1	-0.963265	-1.2747	0.0769231	0.78241	0.77078	29	tags=100%, list=4%, signal=96%
GOBP_ICOSANOID_TRANSPORT	GOBP_ICOSANOID_TRANSPORT	1	-0.963265	-1.2747	0.0769231	0.78241	0.77078	29	tags=100%, list=4%, signal=96%
GOBP_PHOSPHATIDYLCHOLINE_ACYL_CHAIN_REMODELING	GOBP_PHOSPHATIDYLCHOLINE_ACYL_CHAIN_REMODELING	1	-0.963265	-1.2747	0.0769231	0.78241	0.77078	29	tags=100%, list=4%, signal=96%
[truncated: 15,522 more rows]

## Sheet: Table 5
ID	Description	GeneRatio	BgRatio	pvalue	p.adjust	qvalue	geneID	Count
[truncated: 15 more rows]

## Sheet: Table 6
	ONTOLOGY	ID	Description	GeneRatio	BgRatio	pvalue	p.adjust	qvalue	geneID	Count	upregulate
[truncated: 516 more rows]

[truncated: 3 more sheets: Table 7, Table 8, Table 9]
