# Supplementary material for: Pyroptotic Patterns in Blood Leukocytes Predict Disease Severity and Outcome in COVID-19 Patients
Source: Front Immunol. 2022 Jul 19;13:888661. doi: 10.3389/fimmu.2022.888661 (PMC9343985; doi:10.3389/fimmu.2022.888661)
Supplement: Supplementary file 3 [file Table_2.xlsx]

## Sheet: Contents
Description	Sheet
Different expression of 35 pyroptosis-related genes between 2 types of patients	1A
The proportion of ICU, diabetes mellitus, sex, and age between two PYRclusters	S1B,C,D
The pearson correlation between 35 pyroptosis-related genes in COVID -19 patients	1B
The differences of leukocytes' abundance between the 2 types of patients	2B
Significantly different pyroptosis-related genes’ relative expression between two PYRclusters	3C
The difference in clinical features between the two PYRclusters	3D-F,S2A-C
Differences of varieties clinical information including Days admitted before enrollment, replacement therapy (pre-enrollment), mechanical ventilation, albumin, hemoglobin, hemogram.	S3A,D,E,F
Percent of replacement therapy (pre-enrollment) or patients with mechanical ventilation in 2 PYRclusters	S3B,C
The differences of leukocytes' abundance between PYRclusters	4B
ImmuneScore calculated by “Estimate” package between two PYRclusters	4C
Pearson correlation between expressions of 35 pyroptosis-related genes and abundance of leukocytes	4D
Pyrscore between two PYRclusters	5B
The pearson correlations between pyrscore and clinical features	5C-D,S4A-D
The pearson correlation of differentially expressed pyroptosis-related genes and transcription factors in PYRclusters	7B
The pearson correlation between different clinical data and transcription factors	7C

## Sheet: 1A
	variable	p	pwr
1	AIM2	0.000117832	0.752762
2	CASP1	9.86703e-09	0.986042
3	CASP3	3.72554e-09	0.999814
4	CASP4	0.351944	0.134975
5	CASP5	0.81591	0.0543279
6	CASP6	6.63851e-06	0.964791
7	CASP8	0.017196	0.713347
8	CASP9	0.000765227	0.910005
9	ELANE	0.0157943	0.29982
10	GPX4	0.232983	0.274145
11	GSDMA	0.00473213	0.565492
12	GSDMB	0.133798	0.316577
13	GSDMC	1.44007e-09	0.99201
14	GSDMD	0.00476214	0.967756
15	GSDME	0.0633423	0.261198
16	GZMA	0.0371778	0.436734
17	GZMB	0.000503724	0.707315
18	IL18	0.12387	0.322411
19	IL1B	0.50349	0.092971
20	IL6	0.00194134	0.472173
21	NLRC4	0.967178	0.0502028
22	NLRP1	0.022387	0.558545
23	NLRP2	0.0120846	0.403494
24	NLRP3	0.0752494	0.325781
25	NLRP6	0.950891	0.050347
26	NLRP7	2.4629e-06	0.894265
27	NOD1	0.00851415	0.593718
28	NOD2	2.32312e-05	0.941646
29	PJVK	0.981066	0.050085
30	PLCG1	0.336483	0.143256
31	PRKACA	0.0329532	0.44329
32	PYCARD	2.70021e-06	0.999951
33	SCAF11	2.0535e-06	0.983132
34	TIRAP	2.91281e-05	0.949278
35	TNF	0.592109	0.0856787

## Sheet: 1B
	AIM2	CASP1	CASP3	CASP4	CASP5	CASP6	CASP8	CASP9	ELANE	GPX4	GSDMA	GSDMB	GSDMC	GSDMD	GSDME	GZMA	GZMB	IL18	IL1B	IL6	NLRC4	NLRP1	NLRP2	NLRP3	NLRP6	NLRP7	NOD1	NOD2	PJVK	PLCG1	PRKACA	PYCARD	SCAF11	TIRAP	TNF
AIM2	1	1	0.998668	1	1	0.120162	0.985305	0.998869	0.814876	0.997663	0.285718	0.279239	0.998867	0.049861	0.141065	0.24056	0.0604214	0.268163	0.98826	0.0740909	1	0.0554032	0.189712	0.543595	0.347683	0.202921	0.429427	0.99491	0.37066	0.507319	0.285578	0.525977	0.998963	0.797895	0.188834
CASP1	1	1	0.999998	1	1	0.916191	0.999995	1	0.999103	0.780716	0.219431	0.994239	0.999995	0.159399	0.638363	0.579455	0.704651	0.395978	1	0.108384	0.997666	0.991421	0.606986	0.975174	0.149897	0.356645	0.999801	1	0.0498622	0.152963	0.98748	0.379293	1	0.996463	0.637899
CASP3	0.998668	0.999998	1	0.960702	0.26879	1	1	1	0.994067	0.175461	0.888041	0.951759	0.715592	0.186209	0.992857	0.960826	0.835842	0.546988	0.997686	0.726867	0.776876	1	0.854449	0.98672	0.0504737	0.993015	0.970989	1	0.947896	0.962255	0.999996	0.992564	1	1	0.843455
CASP4	1	1	0.960702	1	1	0.0722401	0.999759	0.996703	0.997319	0.984945	0.0903219	0.424798	1	0.0689203	0.0663992	0.0502916	0.0523057	0.148512	1	0.058166	0.999189	0.698553	0.165448	0.826236	0.824652	0.0510294	0.480333	0.999443	0.297286	0.366148	0.792669	0.416369	0.999907	0.662816	0.0510296
CASP5	1	1	0.26879	1	1	0.164824	0.947111	0.817764	0.941791	0.998419	0.11603	0.0498409	0.999517	0.0971541	0.117593	0.24266	0.164431	0.11192	0.999996	0.163762	0.999871	0.146466	0.0504807	0.761582	0.67608	0.118131	0.101499	0.683645	0.679772	0.716358	0.277192	0.357678	0.966871	0.263107	0.0645919
CASP6	0.120162	0.916191	1	0.0722401	0.164824	1	0.994748	0.99993	0.96954	0.812909	0.999558	1	0.0594632	0.182993	0.98579	1	0.999726	0.352619	0.856321	0.992468	0.372244	0.999998	0.999634	0.615093	0.927759	0.999871	0.999999	0.999967	1	1	0.993549	0.923465	1	0.999984	0.999903
CASP8	0.985305	0.999995	1	0.999759	0.947111	0.994748	1	1	0.98513	0.877355	0.521867	0.102337	0.960173	0.986305	0.476303	0.0809715	0.149811	0.887099	0.999793	0.0617781	0.979006	1	0.129809	0.999904	0.751816	0.223851	0.178611	1	0.356778	0.111329	1	0.99985	1	1	0.174083
CASP9	0.998869	1	1	0.996703	0.817764	0.99993	1	1	0.938605	0.0566718	0.824463	0.881667	0.977267	0.228175	0.94984	0.732349	0.61874	0.931513	0.95055	0.639766	0.611072	1	0.531873	1	0.190662	0.781111	0.989162	1	0.668191	0.749694	1	0.866527	1	1	0.493733
ELANE	0.814876	0.999103	0.994067	0.997319	0.941791	0.96954	0.98513	0.938605	1	0.269717	0.360746	0.933868	0.70662	0.0782566	0.417293	0.816907	0.48415	0.519206	0.999379	0.549789	0.084105	0.819427	0.714738	0.570131	0.254807	0.449352	0.848683	0.900758	0.817074	0.818542	0.902944	0.798239	0.999884	0.880081	0.965755
GPX4	0.997663	0.780716	0.175461	0.984945	0.998419	0.812909	0.877355	0.0566718	0.269717	1	0.682899	0.968865	0.830822	0.999814	0.39948	0.998979	0.999713	0.049913	0.791036	0.401466	1	0.386913	0.376407	0.0867559	0.0697191	0.235201	0.965589	0.0541326	0.921267	0.999675	0.0498703	0.999969	0.785534	0.348044	0.825841
GSDMA	0.285718	0.219431	0.888041	0.0903219	0.11603	0.999558	0.521867	0.824463	0.360746	0.682899	1	0.981212	0.100686	0.0510124	0.173444	0.998746	0.973703	0.200435	0.204686	0.886917	0.475066	0.979043	0.899289	0.617635	0.282475	0.538284	0.951593	0.713568	0.94483	0.999683	0.807975	0.246551	0.90625	0.884466	0.835835
GSDMB	0.279239	0.994239	0.951759	0.424798	0.0498409	1	0.102337	0.881667	0.933868	0.968865	0.981212	1	0.616097	0.998081	0.949133	1	1	0.0540169	0.815768	0.985595	0.980102	0.974038	1	0.0790056	0.911587	0.825639	1	0.993838	0.999713	1	0.0512337	0.0499736	0.866683	0.189238	0.998573
GSDMC	0.998867	0.999995	0.715592	1	0.999517	0.0594632	0.960173	0.977267	0.70662	0.830822	0.100686	0.616097	1	0.0566321	0.128781	0.0660288	0.0504776	0.145567	0.975692	0.406833	0.376556	0.686997	0.162016	0.858507	0.374983	0.176453	0.67457	0.998542	0.306571	0.129601	0.556301	0.475412	0.992742	0.621018	0.0890815
GSDMD	0.049861	0.159399	0.186209	0.0689203	0.0971541	0.182993	0.986305	0.228175	0.0782566	0.999814	0.0510124	0.998081	0.0566321	1	0.0563491	0.959672	0.999918	0.88609	0.0521007	0.0836625	0.868838	0.211293	0.558611	0.750361	0.0984705	0.374298	0.999657	0.0531067	0.0729718	0.968706	0.703084	1	0.809351	0.787408	0.577381
GSDME	0.141065	0.638363	0.992857	0.0663992	0.117593	0.98579	0.476303	0.94984	0.417293	0.39948	0.173444	0.949133	0.128781	0.0563491	1	0.975461	0.920643	0.229481	0.759538	0.124331	0.0499417	0.770299	0.802532	0.295401	0.887652	0.395102	0.996792	0.907736	0.481038	0.973545	0.776907	0.141253	0.918358	0.922684	0.999951
GZMA	0.24056	0.579455	0.960826	0.0502916	0.24266	1	0.0809715	0.732349	0.816907	0.998979	0.998746	1	0.0660288	0.959672	0.975461	1	1	0.0573287	0.542672	0.930365	0.99723	0.986425	0.997156	0.143448	0.927163	0.90984	1	0.912416	0.999958	1	0.295608	0.0527394	0.655913	0.278049	0.999988
GZMB	0.0604214	0.704651	0.835842	0.0523057	0.164431	0.999726	0.149811	0.61874	0.48415	0.999713	0.973703	1	0.0504776	0.999918	0.920643	1	1	0.0502585	0.131229	0.94401	0.992335	0.586482	0.997822	0.0601967	0.864527	0.881764	1	0.848395	0.991216	1	0.0500803	0.385035	0.204843	0.0736992	0.992743
IL18	0.268163	0.395978	0.546988	0.148512	0.11192	0.352619	0.887099	0.931513	0.519206	0.049913	0.200435	0.0540169	0.145567	0.88609	0.229481	0.0573287	0.0502585	1	0.0697214	0.108722	0.754983	0.977445	0.060708	0.54559	0.0579084	0.0535363	0.155857	0.749212	0.308863	0.0967922	0.871136	0.367715	0.834934	0.91472	0.327281
IL1B	0.98826	1	0.997686	1	0.999996	0.856321	0.999793	0.95055	0.999379	0.791036	0.204686	0.815768	0.975692	0.0521007	0.759538	0.542672	0.131229	0.0697214	1	0.11341	0.921264	0.997617	0.469611	0.366143	0.167185	0.0606732	0.936851	0.999472	0.198104	0.551796	0.991809	0.449963	1	0.983974	0.999562
IL6	0.0740909	0.108384	0.726867	0.058166	0.163762	0.992468	0.0617781	0.639766	0.549789	0.401466	0.886917	0.985595	0.406833	0.0836625	0.124331	0.930365	0.94401	0.108722	0.11341	1	0.809231	0.413145	0.993494	0.390152	0.370542	0.996358	0.880907	0.84093	0.999008	0.993272	0.167292	0.550089	0.518584	0.196101	0.39234
NLRC4	1	0.997666	0.776876	0.999189	0.999871	0.372244	0.979006	0.611072	0.084105	1	0.475066	0.980102	0.376556	0.868838	0.0499417	0.99723	0.992335	0.754983	0.921264	0.809231	1	0.0523005	0.700925	0.498614	0.567351	0.187238	0.841529	0.304209	0.914542	0.999662	0.879286	0.548755	0.949717	0.952369	0.528066
NLRP1	0.0554032	0.991421	1	0.698553	0.146466	0.999998	1	1	0.819427	0.386913	0.979043	0.974038	0.686997	0.211293	0.770299	0.986425	0.586482	0.977445	0.997617	0.413145	0.0523005	1	0.565551	0.999072	0.523506	0.584125	0.964061	1	0.998122	0.99933	1	0.639651	1	1	0.938586
NLRP2	0.189712	0.606986	0.854449	0.165448	0.0504807	0.999634	0.129809	0.531873	0.714738	0.376407	0.899289	1	0.162016	0.558611	0.802532	0.997156	0.997822	0.060708	0.469611	0.993494	0.700925	0.565551	1	0.0627592	0.478995	0.999998	0.999924	0.852204	0.994313	0.99997	0.0543626	0.109166	0.677302	0.118242	0.746129
NLRP3	0.543595	0.975174	0.98672	0.826236	0.761582	0.615093	0.999904	1	0.570131	0.0867559	0.617635	0.0790056	0.858507	0.750361	0.295401	0.143448	0.0601967	0.54559	0.366143	0.390152	0.498614	0.999072	0.0627592	1	0.169023	0.0736784	0.197206	0.999888	0.378659	0.267366	1	0.885797	0.999997	0.999969	0.16609
NLRP6	0.347683	0.149897	0.0504737	0.824652	0.67608	0.927759	0.751816	0.190662	0.254807	0.0697191	0.282475	0.911587	0.374983	0.0984705	0.887652	0.927163	0.864527	0.0579084	0.167185	0.370542	0.567351	0.523506	0.478995	0.169023	1	0.197369	0.974908	0.123229	0.827431	0.983571	0.640411	0.852657	0.0845473	0.0547592	0.976867
NLRP7	0.202921	0.356645	0.993015	0.0510294	0.118131	0.999871	0.223851	0.781111	0.449352	0.235201	0.538284	0.825639	0.176453	0.374298	0.395102	0.90984	0.881764	0.0535363	0.0606732	0.996358	0.187238	0.584125	0.999998	0.0736784	0.197369	1	0.819293	0.914578	0.874185	0.97651	0.490037	0.135206	0.761482	0.596413	0.335153
NOD1	0.429427	0.999801	0.970989	0.480333	0.101499	0.999999	0.178611	0.989162	0.848683	0.965589	0.951593	1	0.67457	0.999657	0.996792	1	1	0.155857	0.936851	0.880907	0.841529	0.964061	0.999924	0.197206	0.974908	0.819293	1	0.999513	0.976359	1	0.119617	0.0978909	0.960649	0.443449	0.999998
NOD2	0.99491	1	1	0.999443	0.683645	0.999967	1	1	0.900758	0.0541326	0.713568	0.993838	0.998542	0.0531067	0.907736	0.912416	0.848395	0.749212	0.999472	0.84093	0.304209	1	0.852204	0.999888	0.123229	0.914578	0.999513	1	0.615168	0.918637	0.999996	0.671381	1	0.999999	0.853825
PJVK	0.37066	0.0498622	0.947896	0.297286	0.679772	1	0.356778	0.668191	0.817074	0.921267	0.94483	0.999713	0.306571	0.0729718	0.481038	0.999958	0.991216	0.308863	0.198104	0.999008	0.914542	0.998122	0.994313	0.378659	0.827431	0.874185	0.976359	0.615168	1	1	0.815682	0.592478	0.872479	0.884352	0.944115
PLCG1	0.507319	0.152963	0.962255	0.366148	0.716358	1	0.111329	0.749694	0.818542	0.999675	0.999683	1	0.129601	0.968706	0.973545	1	1	0.0967922	0.551796	0.993272	0.999662	0.99933	0.99997	0.267366	0.983571	0.97651	1	0.918637	1	1	0.561	0.0802523	0.906701	0.832442	1
PRKACA	0.285578	0.98748	0.999996	0.792669	0.277192	0.993549	1	1	0.902944	0.0498703	0.807975	0.0512337	0.556301	0.703084	0.776907	0.295608	0.0500803	0.871136	0.991809	0.167292	0.879286	1	0.0543626	1	0.640411	0.490037	0.119617	0.999996	0.815682	0.561	1	0.570068	1	1	0.934191
PYCARD	0.525977	0.379293	0.992564	0.416369	0.357678	0.923465	0.99985	0.866527	0.798239	0.999969	0.246551	0.0499736	0.475412	1	0.141253	0.0527394	0.385035	0.367715	0.449963	0.550089	0.548755	0.639651	0.109166	0.885797	0.852657	0.135206	0.0978909	0.671381	0.592478	0.0802523	0.570068	1	0.999987	0.995314	0.0498539
SCAF11	0.998963	1	1	0.999907	0.966871	1	1	1	0.999884	0.785534	0.90625	0.866683	0.992742	0.809351	0.918358	0.655913	0.204843	0.834934	1	0.518584	0.949717	1	0.677302	0.999997	0.0845473	0.761482	0.960649	1	0.872479	0.906701	1	0.999987	1	1	0.869505
TIRAP	0.797895	0.996463	1	0.662816	0.263107	0.999984	1	1	0.880081	0.348044	0.884466	0.189238	0.621018	0.787408	0.922684	0.278049	0.0736992	0.91472	0.983974	0.196101	0.952369	1	0.118242	0.999969	0.0547592	0.596413	0.443449	0.999999	0.884352	0.832442	1	0.995314	1	1	0.901274
TNF	0.188834	0.637899	0.843455	0.0510296	0.0645919	0.999903	0.174083	0.493733	0.965755	0.825841	0.835835	0.998573	0.0890815	0.577381	0.999951	0.999988	0.992743	0.327281	0.999562	0.39234	0.528066	0.938586	0.746129	0.16609	0.976867	0.335153	0.999998	0.853825	0.944115	1	0.934191	0.0498539	0.869505	0.901274	1

## Sheet: S1B,C,D
	power
Sex	1
icu	1
dm	1

## Sheet: 2B
	variable	p	pwr
1	Activated B cell	0.42134	0.127878
2	Activated CD4 T cell	1.68536e-09	0.999998
3	Activated CD8 T cell	0.745617	0.0641999
4	Activated dendritic cell	0.000540422	0.979515
5	CD56bright natural killer cell	0.112025	0.477436
6	CD56dim natural killer cell	0.0603159	0.53789
7	Central memory CD4 T cell	0.115923	0.405619
8	Central memory CD8 T cell	0.0103992	0.64552
9	Effector memeory CD4 T cell	0.000832916	0.891556
10	Effector memeory CD8 T cell	0.0939403	0.426178
11	Eosinophil	0.999825	0.05
12	Gamma delta T cell	0.0422892	0.5655
13	Immature B cell	0.173884	0.331975
14	Immature dendritic cell	0.000243363	0.975347
15	Macrophage	0.00233024	0.854166
16	Mast cell	0.0133845	0.601049
17	MDSC	0.00241712	0.813666
18	Memory B cell	6.25012e-06	0.964326
19	Monocyte	1.13726e-08	0.999998
20	Natural killer cell	0.0104579	0.777473
21	Natural killer T cell	0.00447062	0.752746
22	Neutrophil	0.343227	0.220874
23	Plasmacytoid dendritic cell	0.00688486	0.82311
24	Regulatory T cell	8.19824e-08	0.998898
25	T follicular helper cell	0.000640306	0.894117
26	Type 1 T helper cell	0.463303	0.110193
27	Type 17 T helper cell	0.193502	0.214261
28	Type 2 T helper cell	3.79574e-08	0.999992

## Sheet: 3C
	variable	p	pwr
1	AIM2	8.49564e-06	0.97676
2	CASP1	0.000587922	0.939795
3	CASP3	0.90609	0.0517963
4	CASP4	1.82418e-10	0.999983
5	CASP5	6.98661e-06	0.964279
6	CASP6	0.00177423	0.963074
7	CASP8	5.2729e-05	0.981667
8	CASP9	0.310121	0.195741
9	ELANE	0.041099	0.766054
10	GPX4	1.42206e-10	1
11	GSDMA	0.0128827	0.903418
12	GSDMB	0.000582467	0.973815
13	GSDMC	9.23815e-05	0.945232
14	GSDMD	0.000159517	0.993595
15	GSDME	0.126685	0.458064
16	GZMA	1.78929e-07	1
17	GZMB	4.33749e-07	1
18	IL18	0.970511	0.0501557
19	IL1B	0.00158565	0.79425
20	IL6	0.069971	0.390715
21	NLRC4	1.16238e-10	0.99998
22	NLRP1	0.975564	0.0500964
23	NLRP2	0.017983	0.833919
24	NLRP3	0.391597	0.166786
25	NLRP6	0.00159737	0.778546
26	NLRP7	0.0345039	0.651942
27	NOD1	0.000388028	0.978688
28	NOD2	0.15196	0.269735
29	PJVK	0.000820608	0.948623
30	PLCG1	3.54985e-06	0.999991
31	PRKACA	0.0973554	0.371069
32	PYCARD	0.00773198	0.863473
33	SCAF11	0.0173656	0.706203
34	TIRAP	0.146664	0.3153
35	TNF	0.000689134	0.977326

## Sheet: 3D-F,S2A-C
	variable	p	effect size
1	age (years)	0.683253	0.0415918
2	apacheii	0.103173	0.217195
3	ventilator-free days	0.0014052	0.31976
4	HF45	0.000213574	0.370603
5	ferritin (ng/ml)	0.419914	0.0835972
6	crp (mg/l)	0.081485	0.182054
7	ddimer (mg/l_feu)	0.013564	0.268265
8	procalcitonin (ng/ml)	0.177931	0.144902
9	lactate (mmol/l)	0.432248	0.0998443
10	fibrinogen	0.995942	0.00114454
11	sofa	0.25806	0.152521

## Sheet: S3A,D,E,F
	variable	p	effect size
1	Days_admitted_before_enrollment	0.76876	0.0299219
2	Albumin_mg.L	0.0115483	0.254204
3	White_blood_cells_K.uL	2.75414e-06	0.471563
4	Hemoglobin_g.dL	0.0384341	0.208428
5	Mean_corpuscular_volume_fL	0.384669	0.0877361
6	Platelet_K.uL	0.200455	0.129036
7	Neutrophils_percent	7.31162e-10	0.619388
8	Lymphocytes_percent	3.01128e-09	0.596452
9	Monocytes_percent	2.90533e-05	0.42055

## Sheet: S3B,C
	power
Mech_Ventilation	1
Plasma_or_CRRT_before_enrollment	1

## Sheet: 4B
	variable	p	pwr
1	Activated B cell	0.000582604	0.899349
2	Activated CD4 T cell	0.115088	0.381526
3	Activated CD8 T cell	5.94e-14	1
4	Activated dendritic cell	0.0044862	0.898175
5	CD56bright natural killer cell	0.00610687	0.739523
6	CD56dim natural killer cell	2.72e-08	0.999999
7	Central memory CD4 T cell	0.000640726	0.97513
8	Central memory CD8 T cell	0.0626719	0.483571
9	Effector memeory CD4 T cell	0.263686	0.204239
10	Effector memeory CD8 T cell	2.93e-11	1
11	Eosinophil	0.00617769	0.779998
12	Gamma delta T cell	3.71e-06	0.997895
13	Immature B cell	0.0627018	0.458798
14	Immature dendritic cell	0.517885	0.100076
15	Macrophage	0.993884	0.0500074
16	Mast cell	0.804914	0.0582233
17	MDSC	3.13e-06	0.999257
18	Memory B cell	0.534059	0.0983163
19	Monocyte	0.000954359	0.906972
20	Natural killer cell	0.302586	0.201035
21	Natural killer T cell	0.0246061	0.635738
22	Neutrophil	1.21e-13	1
23	Plasmacytoid dendritic cell	0.604047	0.0876394
24	Regulatory T cell	0.00152153	0.933303
25	T follicular helper cell	9.91e-07	0.999472
26	Type 1 T helper cell	1.79e-06	0.999349
27	Type 17 T helper cell	0.824523	0.0553438
28	Type 2 T helper cell	0.449793	0.112899
29	Macrophages M2	1.69e-09	1

[truncated: 6 more sheets: 4C, 4D, 5B, 5C-D,S4A-D, 7B, 7C]
